# Supplementary material
Source: publisher site journal article supplement (https://www.degruyterbrill.com/publication/isbn/9783110692143/downloadAsset/9783110692143_Zusatzmaterial_Basiswissen.zip)
Supplement: Supplementary file 1 [file Basiswissen, Zusatzaufgaben Kapitel 0, Aufgaben.doc]

Hochschule Trier, Fachbereich Technik

Prof. Dr.-Ing. Hubert Hinzen

Maschinenelemente Kapitel 0:

Grundlagen der Festigkeitslehre

Aufgabensammlung B:

Stand: 30.03.2020

Inhalt

[1 Werkstoffvergleich im Spannungs-Dehnungs-Diagramm II 2](#__RefHeading___Toc36456044)

[2 Gespanntes Seil 3](#__RefHeading___Toc36456045)

[3 Seilaufhängung II 4](#__RefHeading___Toc36456046)

[4 Fördergurt II 5](#__RefHeading___Toc36456047)

[5 Hubvorrichtung mit Hydraulikzylinder II 6](#__RefHeading___Toc36456048)

[6 Hubvorrichtung mit starrem Ausleger 7](#__RefHeading___Toc36456049)

[7 Canadierpaddel 8](#__RefHeading___Toc36456050)

[8 Bürolocher 9](#__RefHeading___Toc36456051)

[9 Mountainbike-Lenker 11](#__RefHeading___Toc36456052)

[10 Kreuzförmiger Schraubschlüssel 13](#__RefHeading___Toc36456053)

# Werkstoffvergleich im Spannungs-Dehnungs-Diagramm II

*Diese Aufgabe sollte vorzugsweise nach dem Vorlesungskapitel 0.1.1.2 behandelt werden.*

In unten skizziertem Spannungs-Dehnungs-Diagramm sind drei Werkstoffe gegenübergestellt. Kreuzen Sie die jeweils richtige Antwort an!


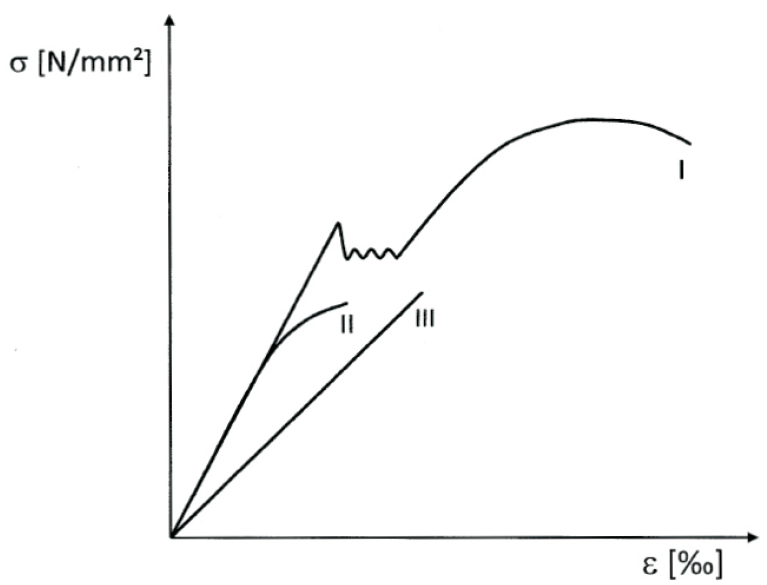


| Werkstoff | I | II | III |
| --- | --- | --- | --- |
| Welcher Werkstoff weist den geringsten Elastizitätsmodul auf? |  |  |  |
| Welcher Werkstoff hat die geringste Steifigkeit? |  |  |  |
| Welcher Werkstoff weist die größte Streckgrenze auf? |  |  |  |
| Welcher Werkstoff erträgt die geringste Bruchlast? |  |  |  |
| Welcher Werkstoff zeigt beim Bruch die geringste plastische Dehnung? |  |  |  |

# Gespanntes Seil

Die unten abgebildete Spannvorrichtung besteht aus zwei Seilen: Das rechte Seil ist mit beiden Enden rechts an eine feste Wand angebunden und umschlingt auf halbem Wege eine Seilrolle, die in einer gabelförmigen Vorrichtung gelagert ist. Diese Gabel ist an ihrem linken Ende mit einem Spannschloss verbunden, welches über ein zweites Seil an eine linke Wand angebunden ist. Durch Drehung der Schraube, deren Kopfreibung durch ein Axialkugellager erleichtert wird, werden die Seile gespannt. Die Abmessungen der Befestigungsmechanismen, des Spannschlosses und der Rolle sind gegenüber den Seillängen vernachlässigbar klein.


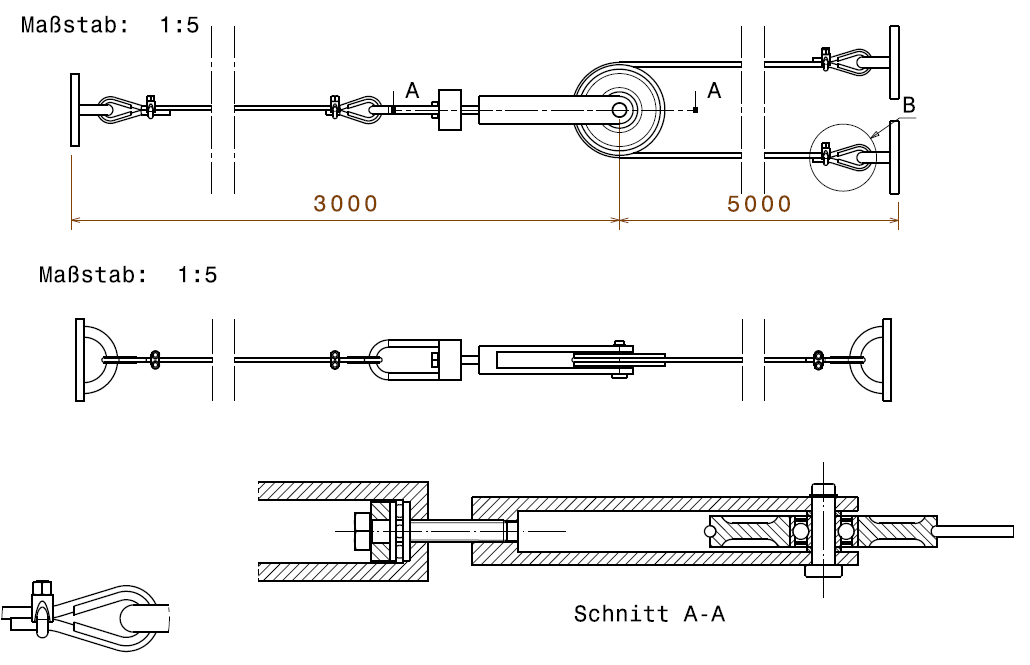


- Welche maximale Zugkraft FSeil kann im einzelnen Seil maximal eingeleitet werden, wenn dessen werkstoffkundliche Belastbarkeit vollständig ausgenutzt werden soll?
- Welche maximale Kraft FSpann kann am Spannschloss aufgebracht werden, ohne dass eins der beiden Seile überlastet wird?
- Welche relative Dehnung  und welche absolute Dehnung LSeil stellt sich dann in den beiden Seilen ein?
- Um welchen Betrag LSpann muss das linke Seil eingezogen werden, damit dieser Lastzustand herbeigeführt wird?

|  | A | Werkstoff | E – Modul | zul | FSeil | FSpann |  | LSeil |
| --- | --- | --- | --- | --- | --- | --- | --- | --- |
|  | mm² |  | N/mm² | N/mm² | N | N | 10-3 | mm |
| linkes Seil | 30 | Stahl | 2,1 * 105 | 760 |  |  |  |  |
| rechtes Seil | 26 | Aluminium | 1,1 * 105 | 320 |  |  |  |  |

| LSpann | mm |  |
| --- | --- | --- |

# Seilaufhängung II

*Diese Aufgabe sollte vorzugsweise nach dem Vorlesungskapitel 0.1.1.4 behandelt werden.*

| 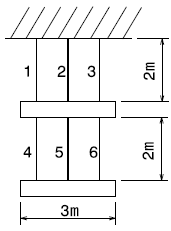 | Zwei Balken werden nach nebenstehender Anordnung mit Seilen an einer Decke befestigt. Die Masse des Balkens kann mit einer Streckenlast von 1 kN/m beschrieben werden.  Die oberen drei Seile unterscheiden sich durch ihren Querschnitt, die unteren drei durch ihren Werkstoff.  Berechnen Sie sowohl die relativen als auch die absoluten Verformungen sowie die Spannungen und Kräfte in den Seilen. |
| --- | --- |

|  |  |  | Seil 1 | Seil 2 | Seil 3 |
| --- | --- | --- | --- | --- | --- |
| Werkstoff |  |  | Stahl | Stahl | Stahl |
| Querschnittsfläche | A | mm² | 10 | 20 | 10 |
| Elastizitätsmodul | E | N/mm² | 2,1*105 | 2,1*105 | 2,1*105 |
| relative Verformung |  | 10-3 |  |  |  |
| absolute Verformung | L | mm |  |  |  |
| Spannung im Seil |  | N/mm² |  |  |  |
| Seilkraft | S | N |  |  |  |

|  |  |  | Seil 4 | Seil 5 | Seil 6 |
| --- | --- | --- | --- | --- | --- |
| Werkstoff |  |  | Kupfer | Aluminium | Kupfer |
| Querschnittsfläche | A | mm² | 10 | 10 | 10 |
| Elastizitätsmodul | E | N/mm² | 1,25*105 | 0,72*105 | 1,25*105 |
| relative Verformung |  | 10-3 |  |  |  |
| absolute Verformung | L | mm |  |  |  |
| Spannung im Seil |  | N/mm² |  |  |  |
| Seilkraft | S | N |  |  |  |

# Fördergurt II

*Diese Aufgabe sollte vorzugsweise nach dem Vorlesungskapitel 0.1.1.4 behandelt werden.*

Ein Förderband aus Gummi soll zur Verbesserung seiner Zugfestigkeit mit Stahleinlagen versehen werden. In einem ersten Entwurf wird vorgeschlagen, nach untenstehender Skizze 5 Stahleinlagen einzubetten, die aus 10 Litzen mit je 0,5 mm Durchmesser bestehen.


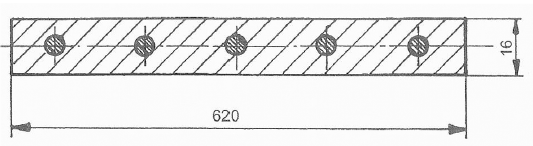


Für die Werkstoffe Stahl und Gummi sind die folgenden Kennwerte gegeben:

|  | E-Modul [N/mm²] | zul [N/mm²] |
| --- | --- | --- |
| Stahl | 210 000 | 600 |
| Gummi | 45 | 12 |

Mit welcher statischen Zugkraft Fmax kann der Fördergurt maximal belastet werden, wenn weder das Gummi noch die Stahleinlage über die zulässige Spannung hinaus belastet werden dürfen?

Die Zugfestigkeit dieses ersten Entwurfs ist unbefriedigend. Welche Maßnahmen würden unter Beibehaltung sämtlicher anderen Parameter die Belastbarkeit des Förderbandes steigern?

|  | ja | nein |
| --- | --- | --- |
| Stahleinlage weglassen |  |  |
| Anzahl der Stahleinlagen verringern |  |  |
| Anzahl der Stahleinlagen erhöhen |  |  |
| Querschnittsfläche Gummi erhöhen |  |  |
| Querschnittsfläche Gummi verringern |  |  |
| zul des Stahls erhöhen |  |  |
| zul des Gummis erhöhen |  |  |

# Hubvorrichtung mit Hydraulikzylinder II

*Diese Aufgabe sollte vorzugsweise nach dem Vorlesungskapitel 0.1.2.2 behandelt werden.*

Mit der unten dargestellten Hubvorrichtung soll eine Last von 500 kg angehoben werden. Der Hebelarm ist links gelenkig im Gestell gelagert und kann in seiner Neigung durch den in der Mitte angreifenden Hydraulikzylinder verstellt werden. Die hier geforderte Festigkeitsberechnung beschränkt sich allerdings auf die dargestellte Lage. Es kann vorausgesetzt werden, daß die Last quasistatisch aufgebracht wird und dass nur die Biegebelastung maßgebend ist.


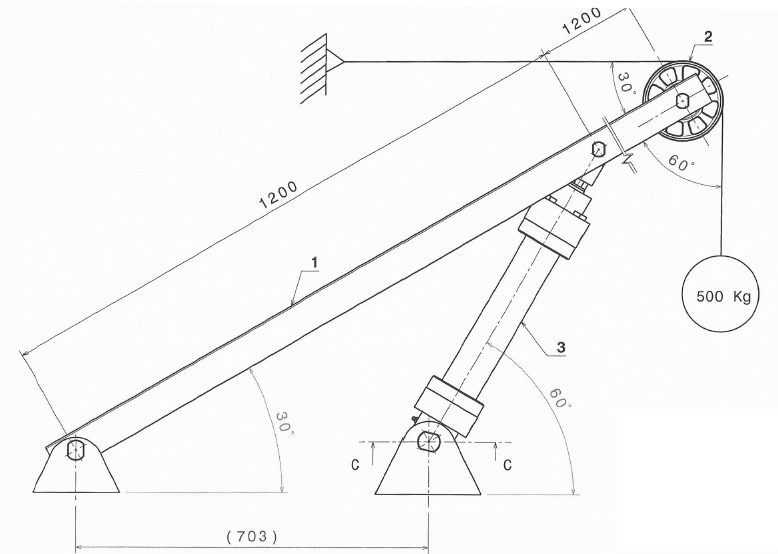


1. An welcher Stelle erfährt der Biegebalken seine höchste Belastung?
2. Wie groß ist das Biegemoment an dieser Stelle?
3. Der verwendete Werkstoff kann mit einer zulässigen Spannung von σzul = 120 N/mm² belastet werden. Wie hoch ist das erforderliche Widerstandsmoment?
4. Es soll ein U-Träger nach DIN 1026 verwendet werden. Welches der beiden Widerstandsmomente ist maßgebend, Wy oder Wz?
5. Welche Profilhöhe ist minimal erforderlich?

| a | b | c | d | e |
| --- | --- | --- | --- | --- |
| Das größte Biegemoment tritt auf | Mbmax  [Nm] | Wmin  [mm³] |  | U-Träger nach  DIN 1026 |
| O an der Rollenachse  O am Anlenkpunkt des Zylinders  O am Anlenkpunkt am Gestell |  |  | O Wy  O Wz |  |

# Hubvorrichtung mit starrem Ausleger

*Diese Aufgabe sollte vorzugsweise nach dem Vorlesungskapitel 0.1.2.5 behandelt werden.*

Die unten skizzierte Hubvorrichtung wird aus zwei Rechteckrohren gleichen Querschnitts zusammengesetzt. Der Rollendurchmesser kann als sehr klein gegenüber den anderen Abmessungen angenommen werden. Es soll eine Last von maximal 60 kg angehoben werden. Es kann eine Biegespannung bzul = 250 N/mm² zugelassen werden.


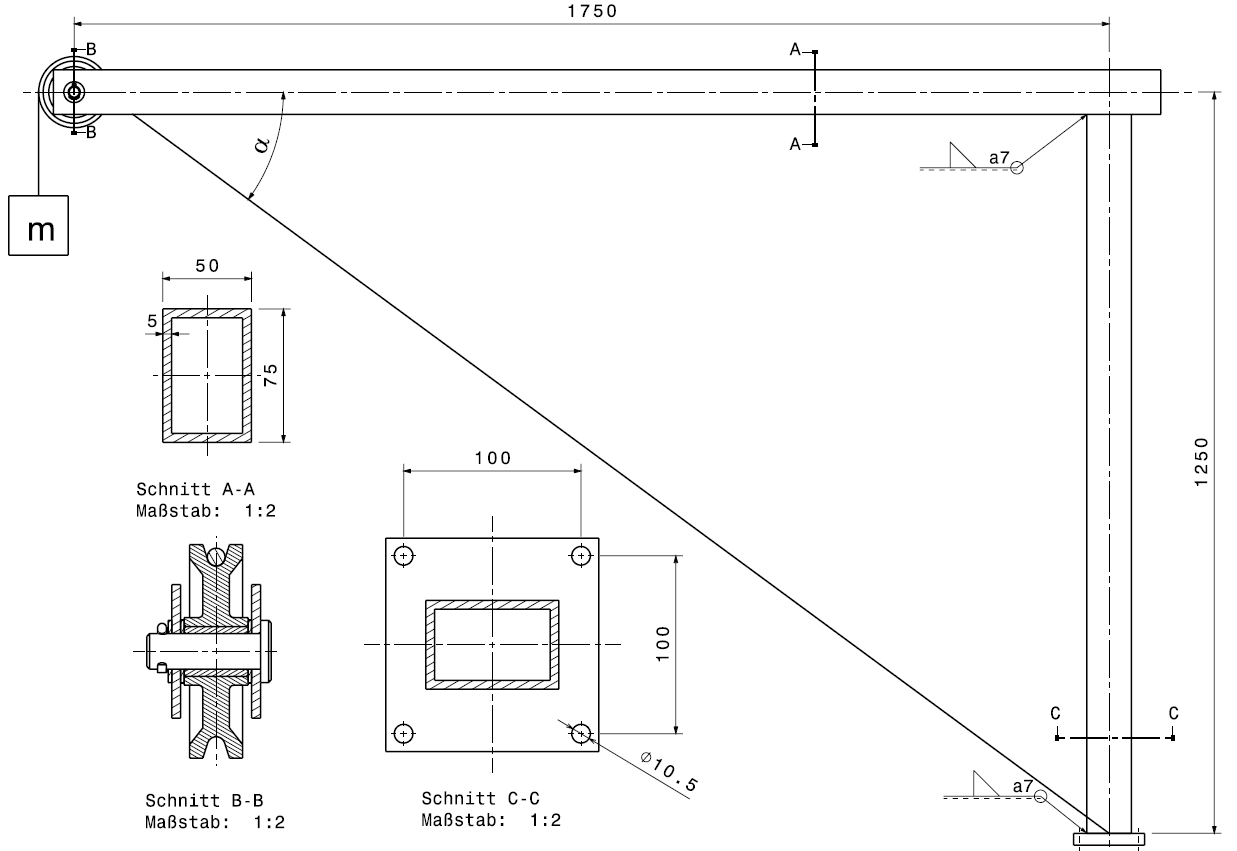


| Ermitteln Sie die an der Rolle wirkende Kraft in ihren Komponenten! | Fx  Fy | N  N |  |
| --- | --- | --- | --- |
| Ermitteln Sie die Größe der an der Rolle wirkenden resultierenden Kraft! | Fres | N |  |

| An welcher Stelle der Konstruktion tritt das größte Biegemoment auf? Dabei kann es hilfreich sein, die Größe des Biegemomentes über der gesamten Konstruktion graphisch aufzutragen. | O an der Seilrolle  O an der Eckverbindung beider Profile  O an der Bodenbefestigung |
| --- | --- |

| Berechnen Sie das größte Biegemoment! | Mb | Nm |  |
| --- | --- | --- | --- |
| Berechnen Sie die größte Biegespannung! | σb | N/mm² |  |
| Wie groß ist die Sicherheit? | S | - |  |

# Canadierpaddel

Während Kajaks mit einem doppelseitigen Paddel gefahren werden, wird für einen Canadier („Kanu“) ein einseitiges Stechpaddel verwendet, welches mit einem einzelnen Paddelblatt ausgestattet ist. Am oberen Ende des Paddelschaftes ist ein querstehendes Griffstück angebracht, mit dem das Paddel zur Ausführung von Steuerbewegungen um seine Hochachse geschwenkt werden kann.

| 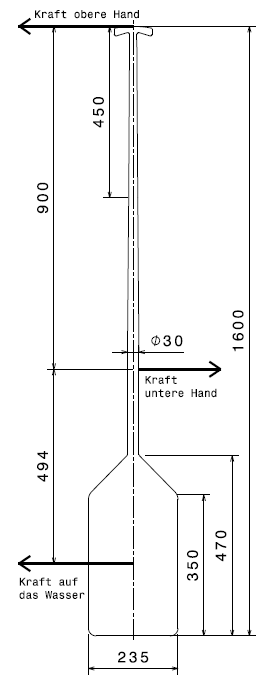 | Der Schaft wird als Biegebalken im Wesentlichen durch drei Kräfte belastet: Für den Vortrieb des Kanus wird am Flächenschwerpunkt des Paddelblattes eine in Fahrtrichtung horizontal auf das Wasser zu übertragene Vortriebskraft erforderlich, die am Schaft als Kräftepaar durch die Hände des Paddlers eingeleitet wird: Die untere Hand übt eine Kraft entgegen der Fahrtrichtung aus, während die obere Hand in Fahrtrichtung drückt. Der Kontakt beider Hände mit dem Schaft kann jeweils als „Gelenk“ im Sinne der Mechanik betrachtet werden.   | - Füllen Sie zunächst die erste Spalte des unten stehenden Schemas aus: Welche Kräfte müssen mit den Händen eingeleitet werden, um am Paddelblatt eine Vortriebskraft von 220 N zu erzeugen? - Welches Biegemoment liegt an den betreffenden Stellen des Paddelblattes vor (zweite Spalte)? - Im Bereich der unteren Hand weist der Paddelschaft einen Durchmesser von 30 mm auf. Wie groß ist dann die Biegespannung? - Auf halbem Wege zwischen oberer und unterer Hand soll der Paddelschaft mit der gleichen Biegespannung belastet werden. Auf welches Maß kann der Durchmesser an dieser Stelle reduziert werden? | | --- | | | | | | |
| --- | --- | --- | --- | --- | --- | --- | --- |
|  | | Kraft | Biege-moment | Durch-messer | Biege-spannung |  |
|  | | N | Nm | mm | N/mm² |  |
| obere Hand | |  |  |  |  |  |
| auf halbem Wege zwischen  oberer und unterer Hand | |  |  |  |  |  |
| untere Hand | |  |  | 30 |  |  |
| Schwerpunkt Paddelblatt | | 220 |  |  |  |  |

# Bürolocher

*Diese Aufgabe sollte vorzugsweise nach dem Vorlesungskapitel 0.2.2. behandelt werden.*

Es sollen die Kräfte und Spannungen betrachtet werden, die beim Ausstanzen von Löchern mittels des unten dargestellten Bürolochers entstehen. Papier bzw. Karton schert bei einer Schubspannung von 3 N/mm² sicher ab. Sicherheitshalber soll eine ebene Stirnfläche des Lochstempels angenommen werden. Die Feder ist so vorgespannt, dass deren Kraft mit einem konstanten Wert von 30 N angenommen werden kann. Reibeinflüsse in den Gelenken und Führungen können vernachlässigt werden.


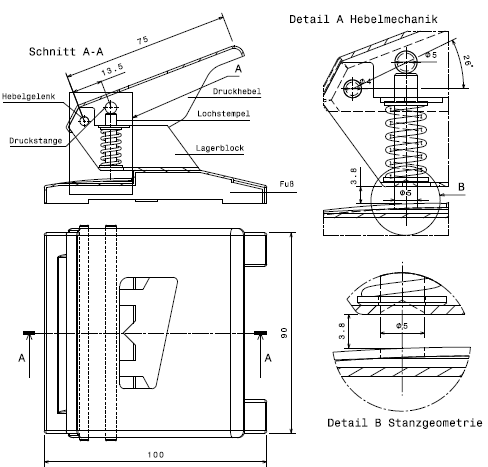


|  | Welche Prozeßkraft ist für das Ausstanzen eines einzelnen Loches erforderlich? | Welche Kraft muss an der oberen Stirnfläche eines jeden Lochstempels eingeleitet werden? | Welche Kraft muss in vertikaler Richtung auf das äußere Ende des Druckhebels aufgebracht werden? |
| --- | --- | --- | --- |
| Es wird ein einzelnes Blatt Papier (Blattdicke 0,12 mm) gelocht. |  |  |  |
| Es wird ein 1 mm starker Karton gelocht. |  |  |  |
| Es wird ein Papierstapel gelocht, der so hoch ist wie es der Locher zulässt. |  |  |  |

Auch die Mechanik des Lochers selber ist schubspannungsbelastet.

| Wie groß ist die größtmögliche Schubspannung in der Druckstange? | N/mm² |  |
| --- | --- | --- |
| Wie groß ist die größtmögliche Schubspannung im Hebelgelenk? | N/mm² |  |

# Mountainbike-Lenker

*Diese Aufgabe sollte vorzugsweise nach dem Vorlesungskapitel 0.2.3.2. behandelt werden.*

Der Lenker eines Mountainbikes ist in seiner Belastung zu überprüfen, wobei zwei kritische Betriebszustände zu unterscheiden sind:


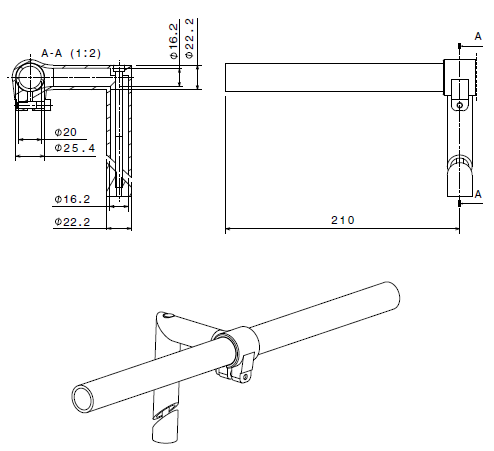


**Vollbremsung:**

Bei Vollbremsung muss im ungünstigsten Fall davon ausgegangen werden, dass sowohl die gesamte Gewichtskraft (nach unten) als auch die gesamte Bremskraft des Fahrers (nach vorne) am Lenker abgestützt wird. In diesem Fall wirkt am äußeren Ende einer jeden Hälfte des Lenkerbügels Kraft von 550 N, die unter einem Winkel von 45° zur Fahrtrichtung angreift. Berechnen Sie die Belastung an der kritischen Stelle des Lenkerbügels, die im Wesentlichen aus Biegung besteht!

| Mbmax | Nm |  |
| --- | --- | --- |
| Wax | mm³ |  |
| bmax | N/mm² |  |

**Wiegetritt:**

Beim Wiegetritt geht der Fahrer aus dem Sattel, so dass die durch das Treten verursachten Kräfte nur am Lenker abgestützt werden können. Dabei wird im ungünstigsten Fall an den beiden äußeren Ende des Lenkerbügels eine Kraft von je 150 N eingeleitet, die auf der einen Seite nach oben und auf der anderen Seite nach unten gerichtet ist. Die Belastung auf den Lenkerbügel ist geringer als die bei Vollbremsung, aber der Vorbau (Verbindungsstück zwischen Lenkerbügel und Steuerrohr) ist nun zu untersuchen, wobei die Belastung im waagerechten Teil des Vorbaus im Wesentlichen aus Torsion und im senkrechten Teil des Vorbaus aus Biegung besteht.

| waagerechter Teil des Vorbaus | | | senkrechter Teil des Vorbaus | | |
| --- | --- | --- | --- | --- | --- |
| Mtmax | Nm |  | Mbmax | Nm |  |
| Wpol | mm³ |  | Wax | mm³ |  |
| tmax | N/mm² |  | bmax | N/mm² |  |

# Kreuzförmiger Schraubschlüssel

Vor allen Dingen für den Radwechsel von Kraftfahrzeugen wird häufig ein kreuzförmiger Schraubschlüssel verwendet, an dessen vier Enden unterschiedlich große glockenförmige "Nüsse" angeordnet sind. Das Anzugsmoment wird querkraftfrei über die beiden jeweils quer stehenden Stangen mit zwei entgegengesetzt gerichteten, aber betragsmäßig gleichgroßen Handkräften an gleichen Hebelarmen eingeleitet. Auf eine Verwendung des in der rechten Bildhälfte skizzierten Verlängerungsrohres wird verzichtet. Eine Handkraft von maximal 1.000 N kann im Extremfall am äußersten Ende des quer stehenden Hebelarmes eingeleitet werden.


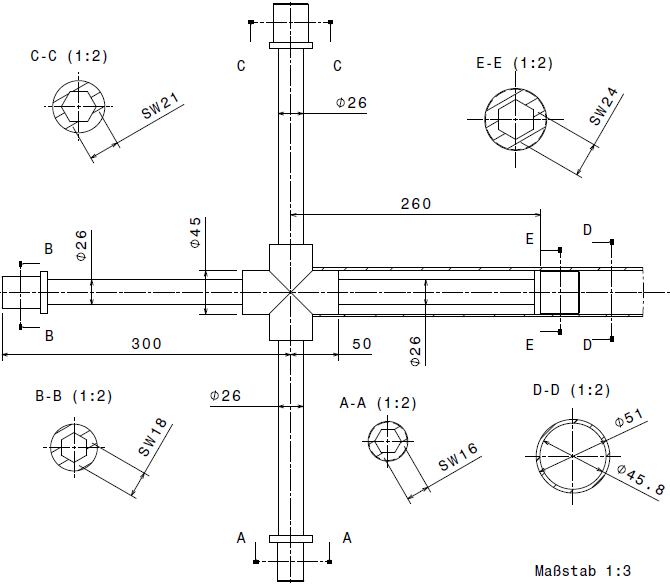


| Welches Torsionsmoment kann maximal in Verlängerung der Schraubenachse auftreten? | Nm |  |
| --- | --- | --- |
| Wie groß ist das polare Widerstandsmoment des auf Torsion belasteten Abschnitts? | mm³ |  |
| Wie hoch ist die maximale Torsionsspannung? | N/mm² |  |
|  |  |  |
| Wie groß ist das Biegemoment an der festigkeitsmäßig kritischen Stelle des querstehende Hebelarmes? | Nm |  |
| Wie groß ist das axiale Widerstandsmoment an dieser Stelle? | mm³ |  |
| Wie groß ist die maximale Biegespannung? | N/mm² |  |
