# Supplementary material
Source: publisher site journal article supplement (https://www.degruyterbrill.com/publication/isbn/9783110692143/downloadAsset/9783110692143_Zusatzmaterial_Basiswissen.zip)
Supplement: Supplementary file 2 [file Basiswissen, Zusatzaufgaben Kapitel 0, Lösungen.doc]

Hochschule Trier, Fachbereich Technik

Prof. Dr.-Ing. Hubert Hinzen

Maschinenelemente Kapitel 0

Grundlagen Festigkeitslehre

Aufgabensammlung B

Lösungen

Stand: 30.03.2020

Inhalt

[1 Spannungs-Dehnungs-Diagramm II 2](#__RefHeading___Toc16847286)

[2 Werkstoffvergleich im Spannungs-Dehnungs-Diagramm II 4](#__RefHeading___Toc16847287)

[3 Gespanntes Seil 5](#__RefHeading___Toc16847288)

[4 Seilaufhängung II 6](#__RefHeading___Toc16847289)

[5 Fördergurt II 8](#__RefHeading___Toc16847290)

[6 Hubvorrichtung mit Hydraulikzylinder II 9](#__RefHeading___Toc16847291)

[7 Brücke II 10](#__RefHeading___Toc16847292)

[8 Unwuchtantrieb II 12](#__RefHeading___Toc16847293)

[9 Förderzeug 14](#__RefHeading___Toc16847294)

[10 Hubvorrichtung mit starrem Ausleger 15](#__RefHeading___Toc16847295)

[11 Verfahrbare Hubvorrichtung 16](#__RefHeading___Toc16847296)

[12 T-Profil als Biegebalken 17](#__RefHeading___Toc16847297)

[13 Canadierpaddel 18](#__RefHeading___Toc16847298)

[14 Lochzange für Leder 19](#__RefHeading___Toc16847299)

[15 Bürolocher 20](#__RefHeading___Toc16847300)

[16 Mountainbike-Lenker 22](#__RefHeading___Toc16847301)

[Vollbremsung 22](#__RefHeading___Toc16847302)

[Wiegetritt 22](#__RefHeading___Toc16847303)

[17 Kreuzförmiger Schraubschlüssel 23](#__RefHeading___Toc16847304)

# Werkstoffvergleich im Spannungs-Dehnungs-Diagramm II

| Werkstoff | I | II | III |
| --- | --- | --- | --- |
| Welcher Werkstoff weist den geringsten Elastizitätsmodul auf? |  |  | X |
| Welcher Werkstoff hat die geringste Steifigkeit? |  |  | X |
| Welcher Werkstoff weist die größte Streckgrenze auf? | X |  |  |
| Welcher Werkstoff erträgt die geringste Bruchlast? |  | X |  |
| Welcher Werkstoff zeigt beim Bruch die geringste plastische Dehnung? |  |  | X |

# Gespanntes Seil

Das rechte Seil erreicht früher seine Festigkeitsgrenze, ist das Schwachglied in der Kette

links:

rechts:

→

links:

rechts:

|  | A | Werkstoff | E – Modul | zul | FSeil | FSpann |  | LSeil |
| --- | --- | --- | --- | --- | --- | --- | --- | --- |
|  | mm² |  | N/mm² | N/mm² | N | N | 10-3 | mm |
| linkes Seil | 30 | Stahl | 2,1 * 105 | 760 | 22.800 | 16.640 | 2,64 | 7,29 |
| rechtes Seil | 26 | Aluminium | 1,1 * 105 | 320 | 8.320 |  | 2,91 | 29,10 |

| LSpann | mm | 21,84 |
| --- | --- | --- |

# Seilaufhängung II

Sowohl der untere als auch der obere Balken weisen folgende Gewichtskraft auf:

Gunten = Goben = 3 m * 1 kN/m = 3 kN

unteres Teilsystem:

Gunten = S4 + S5 + S6 → S = σ * A σ = E * ɛ

Gunten = E4 * ɛu * A4 + E5 * ɛu * A5 + E6 * ɛu * A6 = (2 * ECu + EAl) * 10 mm² * ɛu

→ ∆Lu = ɛu * L = 0,932 * 10³ * 2.000 mm = 1,863 mm

σ = E * ɛ

S = σ * A

zur Kontrolle: 2 * SCu + SAl = 2 * 1.165 N + 671 N = 3.001 N = Gunten

oberes Teilsystem:

G = Gunten + Goben = 6 kN

G = S1 + S2 + S3 → S = σ * A σ = E * ɛ

G = E1 * ɛo * A1 + E2 * ɛo * A3 + E3 * ɛo * A3 = ESt * ɛo * (2 * A1 + A2)

→ ∆Lo = ɛo * L = 0,714*10³ * 2.000 mm = 1,429 mm

σ = E * ɛ

S = σ * A

zur Kontrolle: 2 * S1 + S2 = 2 * 1.500 N + 3.000 N = 6.00 N = G

|  |  |  | Seil 1 | Seil 2 | Seil 3 |
| --- | --- | --- | --- | --- | --- |
| Werkstoff |  |  | Stahl | Stahl | Stahl |
| Querschnittfläche | A | mm² | 10 | 20 | 10 |
| Elastizitätsmodul | E | N/mm² | 2,1*105 | 2,1*105 | 2,1*105 |
| relative Verformung |  | 10-3 | 0,714*10³ | 0,714*10³ | 0,714*10³ |
| absolute Verformung | L | mm | 1,429 | 1,429 | 1,429 |
| Spannung im Seil |  | N/mm² | 150,0 | 150,0 | 150,0 |
| Seilkraft | S | N | 1.500 | 3.000 | 1.500 |

|  |  |  | Seil 4 | Seil 5 | Seil 6 |
| --- | --- | --- | --- | --- | --- |
| Werkstoff |  |  | Kupfer | Aluminium | Kupfer |
| Querschnittfläche | A | mm² | 10 | 10 | 10 |
| Elastizitätsmodul | E | N/mm² | 1,25*105 | 0,72*105 | 1,25*105 |
| relative Verformung |  | 10-3 | 0,932 | 0,932 | 0,932 |
| absolute Verformung | L | mm | 1,863 | 1,863 | 1,863 |
| Spannung im Seil |  | N/mm² | 116,5 | 67,1 | 116,5 |
| Seilkraft | S | N | 1.165 | 671 | 1.165 |

# Fördergurt II

Gummi: maxGummi =

Stahl: maxStahl =

maßgebend für den Verbundwerkstoff ist der kleinere der beiden Werte: max = 0,002857

homogener Werkstoff: Fzul = zul * A = E * zul * A

Verbundwerkstoff: Fzul = max * (EStahl * AStahl + EGummi * AGummi)

Fzul = 0,002857 * (2.061.670 N + 446.400 N) = 7.166 N

| Fmax [N] | 7.166 |
| --- | --- |

Stahleinlagen weglassen:

Fzul = AGummi * zulGummi = 620 mm * 16 mm * 12 N/mm² = 119 040 N (technisch kaum realisierbar, weil dann das Band um 26,7 % vorgespannt werden müßte)

Anzahl der Stahleinlagen verringern:

max = 0,002857 würde bestehen bleiben, aber AStahl würde kleiner werden

Anzahl der Stahleinlagen erhöhen:

max = 0,002857 würde bestehen bleiben, aber AStahl würde größer werden

Querschnittsfläche Gummi erhöhen:

max = 0,002857 würde bestehen bleiben, aber AGummi würde größer werden

Querschnittsfläche Gummi verringern:

max = 0,002857 würde bestehen bleiben, aber AGummi würde kleiner werden

zulStahl erhöhen: max würde größer werden

zulGummi erhöhen: max würde nicht größer werden

|  | ja | nein |
| --- | --- | --- |
| Stahleinlage weglassen | X |  |
| Anzahl der Stahleinlagen verringern |  | X |
| Anzahl der Stahleinlagen erhöhen | X |  |
| Querschnittsfläche Gummi erhöhen | X |  |
| Querschnittsfläche Gummi verringern |  | X |
| zul des Stahls erhöhen | X |  |
| zul des Gummis erhöhen |  | X |

# Hubvorrichtung mit Hydraulikzylinder II

1. größte Belastung am Anlenkpunkt des Hydraulikkolbens
2. Gewichtskraft G = m * g =

tritt sowohl als nach unten gerichtete Gewichtsbelastung als auch nach links gerichtete Seilkraft auf

c. 

e. U 160 mit h = 160 mm mit Wax z = 18.300 mm³ (s. Tabelle S. 20 oben)

| a | b | c | d | e |
| --- | --- | --- | --- | --- |
| Das größte Biegemoment tritt auf | Mbmax  [Nm] | Wmin  [mm³] |  | U-Träger nach  DIN 1026 |
| O an der Rollenachse   am Anlenkpunkt des Zylinders  O am Anlenkpunkt am Gestell | 2.154 | 17.953 | O Wy   Wz | U 160 |

# Hubvorrichtung mit starrem Ausleger

Winkel der Resultierenden =

| Ermitteln Sie die an der Rolle wirkende Kraft in ihren Komponenten! | Fx  Fy | N  N | 479  931 |
| --- | --- | --- | --- |
| Ermitteln Sie die Größe der an der Rolle wirkenden resultierenden Kraft! | Fres | N | 1.047 |

| An welcher Stelle der Konstruktion tritt das größte Biegemoment auf? Dabei kann es hilfreich sein, die Größe des Biegemomentes über der gesamten Konstruktion graphisch aufzutragen. | O an der Seilrolle  **** an der Eckverbindung beider Profile  O an der Bodenbefestigung |
| --- | --- |

| Berechnen Sie das größte Biegemoment! | Mb | Nm | 1.629 |
| --- | --- | --- | --- |
| Berechnen Sie die größte Biegespannung! | σb | N/mm² | 72,5 |
| Wie groß ist die Sicherheit? | S | - | 3,45 |

# Canadierpaddel

Momentengleichgewicht um die untere Hand:

Kräftegleichgewicht in der Horizontalen:

Biegemoment im Paddelschaft am Angriffspunkt der unteren Hand:

Biegemoment im Paddelschaft auf halbem Wege zwischen oberer und unterer Hand:

Biegespannung im Paddelschaft am Angriffspunkt der unteren Hand:

Biegespannung im Paddelschaft auf halbem Wege zwischen oberer und unterer Hand:

|  | Kraft | Biege-moment | Durch-messer | Biege-spannung |
| --- | --- | --- | --- | --- |
|  | N | Nm | mm | N/mm² |
| obere Hand | 121 | 0 |  |  |
| auf halbem Wege zwischen  oberer und unterer Hand |  | 54 | 23,7 | 41,1 |
| untere Hand | 341 | 109 | **30** | 41,1 |
| Schwerpunkt Paddelblatt | **220** | 0 |  |  |

# Bürolocher

Kraft für Stanzvorgang:

für einzelnes Blatt Papier:

für einen 1 mm dicken Karton:

für Papierstapel maximaler Höhe:

Die Kraft an der oberen Stirnfläche des Lochstempels FLS setzt sich aus der Kraft des Stanzvorganges und der Federkraft (30 N) zusammen.

Kraft am Druckhebel:

∑MG = 0:

für einzelnes Blatt Papier:

für einen 1 mm dicken Karton:

für Papierstapel maximaler Höhe:

|  | Welche Prozeßkraft ist für das Ausstanzen eines einzelnen Loches erforderlich? | Welche Kraft muss an der oberen Stirnfläche eines jeden Lochstempels eingeleitet werden? | Welche Kraft muss in vertikaler Richtung auf das äußere Ende des Druckhebels aufgebracht werden? |
| --- | --- | --- | --- |
| Es wird ein einzelnes Blatt Papier (Blattdicke 0,12 mm) gelocht. | 5,7 | 35,7 | 12,9 |
| Es wird ein 1 mm starker Karton gelocht. | 47,1 | 77,1 | 27,8 |
| Es wird ein Papierstapel gelocht, der so hoch ist wie es der Locher zulässt. | 179,1 | 209,1 | 75,3 |

Schubspannung in der Druckstange:

Zur Ermittlung der Kraft im Hebelgelenk wird das Momentengleichgewicht um die Druckstange formuliert:

Schubspannung im Hebelgelenk:

| Wie groß ist die Schubspannung in der Druckstange? | N/mm² | 10,6 |
| --- | --- | --- |
| Wie groß ist die Schubspannung im Hebelgelenk? | N/mm² | 12,2 |

# Mountainbike-Lenker

## Vollbremsung

| Mbmax | Nm | 115,5 |
| --- | --- | --- |
| Wax | mm³ | 990,4 |
| bmax | N/mm² | 116,0 |

## Wiegetritt

waagerechter Teil des Vorbaus

senkrechter Teil des Vorbaus

Mbmax = Mtmax = 63,0 Nm

| waagerechter Teil des Vorbaus | | | senkrechter Teil des Vorbaus | | |
| --- | --- | --- | --- | --- | --- |
| Mtmax | Nm | 63,0 | Mbmax | Nm | 63,0 |
| Wpol | mm³ | 1.539 | Wax | mm³ | 769 |
| tmax | N/mm² | 40,9 | bmax | N/mm² | 81,9 |

# Kreuzförmiger Schraubschlüssel

**Torsion:**

**Biegung:**

| Welches Torsionsmoment kann maximal in Verlängerung der Schraubenachse auftreten? | Nm | 600 |
| --- | --- | --- |
| Wie groß ist das polare Widerstandsmoment des auf Torsion belasteten Abschnitts? | mm³ | 3.451 |
| Wie hoch ist die maximale Torsionsspannung? | N/mm² | 173,9 |
|  |  |  |
| Wie groß ist das Biegemoment an der festigkeitsmäßig kritischen Stelle des querstehende Hebelarmes? | Nm | 250 |
| Wie groß ist das axiale Widerstandsmoment an dieser Stelle? | mm³ | 1.726 |
| Wie groß ist die maximale Biegespannung? | N/mm² | 144,8 |
