# Supplementary material
Source: publisher site journal article supplement (https://www.degruyterbrill.com/publication/isbn/9783110692143/downloadAsset/9783110692143_Zusatzmaterial_Basiswissen.zip)
Supplement: Supplementary file 3 [file Basiswissen, Zusatzaufgaben Kapitel 1, Aufgaben.doc]

Hochschule Trier, Fachbereich Technik

Prof. Dr.-Ing. Hubert Hinzen

Maschinenelemente Kapitel 1

Achsen, Wellen, Betriebsfestigkeit

Aufgabensammlung B

Stand: 30.03.2020

Inhalt

[1 Aufhängevorrichtung 2](#__RefHeading___Toc36457013)

[2 Haltevorrichtung I 3](#__RefHeading___Toc36457014)

[3 Rollenlaufbahn 4](#__RefHeading___Toc36457015)

[3.1 Dimensionierung des Profils 4](#__RefHeading___Toc36457016)

[3.2 Belastung der Rollenachse 5](#__RefHeading___Toc36457017)

[3.3 Belastung des Verbindungsbolzens 5](#__RefHeading___Toc36457018)

[4 Haltevorrichtung II 6](#__RefHeading___Toc36457019)

[5 Kurbel 7](#__RefHeading___Toc36457020)

[6 Achse Hubvorrichtung 8](#__RefHeading___Toc36457021)

[7 Belastbarkeit einer Achse in Abhängigkeit von der Lagerung II 9](#__RefHeading___Toc36457022)

[8 Getriebewelle Zahnrad - Reibrad I ohne Dauerfestigkeitsnachweis 11](#__RefHeading___Toc36457023)

[9 Kurbelwelle, beidseitig gelagert 12](#__RefHeading___Toc36457024)

[10 Dauerfestigkeitsnachweis Hubwerkwelle 14](#__RefHeading___Toc36457025)

[11 Dauerfestigkeit Tretlagerwelle 16](#__RefHeading___Toc36457026)

# Aufhängevorrichtung

*Diese Aufgabe sollte vorzugsweise nach dem Vorlesungskapitel 1.1. behandelt werden.*

Gegeben ist die unten stehende L-förmige Anordnung zweier warmgewalzter I-Träger nach DIN 1025 T3 (breite I-Träger, leichte Ausführung). Die Breite der Träger beträgt 180 mm. Die Konstruktion wird in der dargestellten Weise mit einer Kraft von 50 kN belastet.


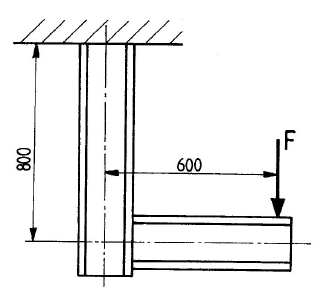


Wie groß ist die Normalspannung im senkrecht angeordneten Profil?

# Haltevorrichtung I

*Diese Aufgabe sollte vorzugsweise nach dem Vorlesungskapitel 1.1. behandelt werden.*

Die unten dargestellte Haltevorrichtung besteht aus einem Rohr (Pos.1) und einem senkrecht dazu angebrachten Rechteckrohr (Pos. 2, Wandstärke 3 mm), welches mit einer Kraft F = 400 N belastet wird. Das Rohr 1 ist am oberen, hinteren Ende mit einer Rundumnaht an der festen Umgebung angeschweißt und in der Nähe des anderen Endes in einer Buchse (Pos. 5) drehbar gelagert.


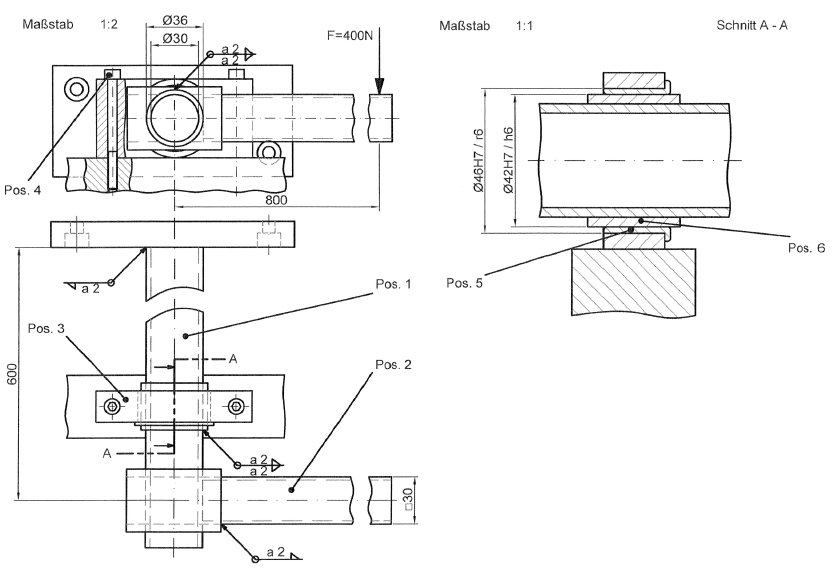


Der Abstand zwischen Rechteckrohr und Lagerbock ist vernachlässigbar klein.

Wie groß sind die größten Spannungen (Torsionsschub, Querkraftschub, Biegespannung, Vergleichsspannung) im Rohr bzw. Rechteckrohr, wenn der Lagerbock fest mit der Umgebung verbunden ist?

|  |  |  | Rohr 1 | Rechteckrohr 2 |
| --- | --- | --- | --- | --- |
| Torsionsschub | τt | N/mm² |  |  |
| Biegespannung | σb | N/mm² |  |  |
|  |  |  |  |  |
| Vergleichsspannung | σV | N/mm² |  |  |

Wie groß sind die größten Spannungen, wenn der Lagerbock entfällt?

|  |  |  | Rohr 1 | Rechteckrohr 2 |
| --- | --- | --- | --- | --- |
| Torsionsschub | τt | N/mm² |  |  |
| Biegespannung | σb | N/mm² |  |  |
|  |  |  |  |  |
| Vergleichsspannung | σV | N/mm² |  |  |

# Rollenlaufbahn

*Diese Aufgabe sollte vorzugsweise nach dem Vorlesungskapitel 1.1. behandelt werden.*

An die unten abgebildete Rollenlaufbahn wird eine Last von 1.268 kg angehängt und in der Horizontalen verfahren.


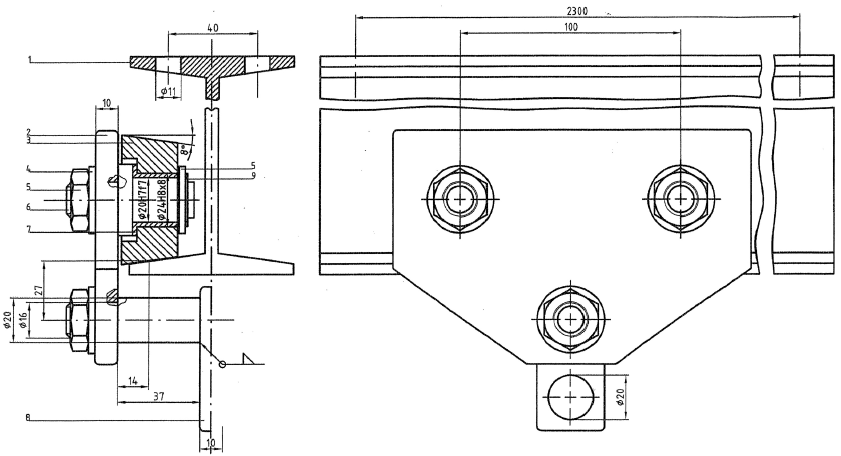


Es sind sowohl das Profil als auch die Rollenachse und der Verbindungsbolzen auf Festigkeit zu dimensionieren. Die einzelnen Aufgabenteile können unabhängig voneinander gelöst werden.

## Dimensionierung des Profils

Für die Dimensionierung des Profils können folgende Annahmen getroffen werden:

- Für die Festigkeit des Profils ist nur die Biegebelastung maßgebend
- Das Eigengewicht des Trägers ist zu vernachlässigen
- Die Laufschiene wird abschnittsweise an der Decke montiert, wobei die Befestigung als Gelenk angenommen werden kann.
- Es wird sichergestellt, daß sich nur jeweils eine Laufkatze auf einem Laufbahnabschnitt befindet.

Es wird das Profil I160 aus St34 (bS = 300 N/mm²) verwendet. Wie weit dürfen die Deckenbefestigungen maximal auseinander liegen, wenn eine Sicherheit von 2,5 gefordert wird?

## Belastung der Rollenachse

Die Rollenachse wird mit einer Mutter M16 befestigt. Das Anzugsmoment ist so bemessen, daß durch das Anziehen der Mutter eine Zugspannung von 100 N/mm² eingeleitet wird. Welche Vergleichsspannung liegt an der kritischen Stelle vor? Zur Dokumentation der Ergebnisse bedienen Sie sich bitte des folgenden Schemas:

| FV [N] = L [N] | Z [N/mm²] = 100 |
| --- | --- |
| Q [N] = | Q [N/mm²] = |
| Mb [Nm]= | b [N/mm²] = |
|  | V [N/mm²] = |

## Belastung des Verbindungsbolzens

Der Verbindungsbolzen der beiden Seitenlaschen untereinander ist ebenfalls an jeder Seite mit einer Mutter M16 gesichert. Das Anzugsmoment ist so bemessen, daß durch das Anziehen der Mutter eine Zugspannung von 100 N/mm² eingeleitet wird. Führen Sie den Festigkeitsnachweis sowohl an der Verbindungsstelle zwischen Lasche und Verbindungsbolzen als auch in der Mitte des Verbindungsbolzens. Welche Vergleichsspannung liegt vor? Zur Dokumentation der Ergebnisse bedienen Sie sich bitte des folgenden Schemas:

| Verbindungsstelle Seitenlasche – Bolzen | | Bolzenmitte | |
| --- | --- | --- | --- |
| FV [N] | Z [N/mm²] = 100 |  |  |
| L [N] = | Z [N/mm²] = | L [N] = | Z [N/mm²] = |
| Q [N] = | Q [N/mm²] = | Q [N] = | Q [N/mm²] = |
| Mb [Nm]= | b [N/mm²] = | Mb [Nm] = | b [N/mm²] = |
|  | V [N/mm²] = |  | V [N/mm²] = |

# Haltevorrichtung II

*Diese Aufgabe sollte vorzugsweise nach dem Vorlesungskapitel 1.1. behandelt werden.*

Die unten skizzierte Haltevorrichtung besteht aus einem in der Wand festgelegten Rohr und einem daran befestigten Hebelarm (quadratischer Querschnitt 30 mm * 30 mm), an dessen Ende eine Kraft eingeleitet wird. Das Rohr wird in der Nähe der Verbindungsstelle mit einem Stehlager abgestützt, welches eine Drehung ermöglicht und Querkräfte abstützt. Alle Bauteile können eine Schubspannung von 70 N/mm² und eine Normalspannung von 100 N/mm² aufnehmen.


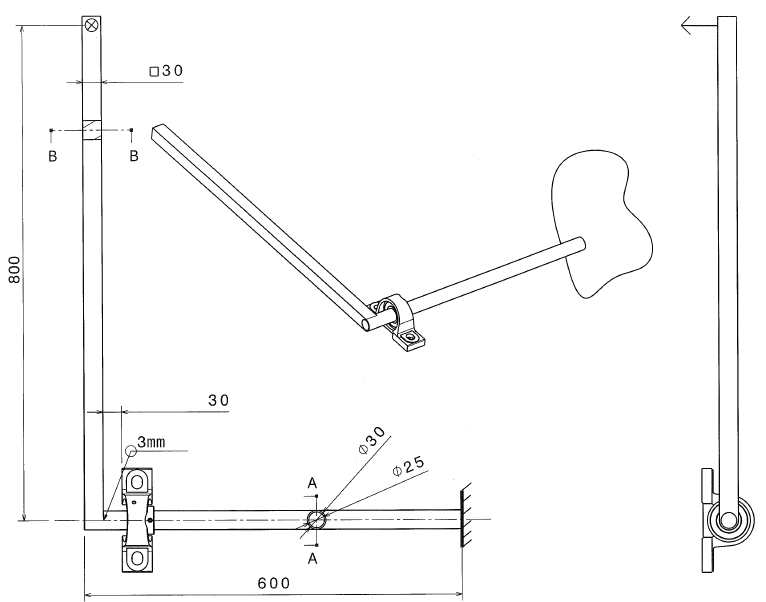


| Wie groß darf die belastende Kraft höchstens werden, wenn ausschließlich die Belastbarkeit des Hebels mit quadratischem Querschnitt betrachtet wird? | N |  |
| --- | --- | --- |
| Wie groß darf die belastende Kraft höchstens werden, wenn ausschließlich die Belastbarkeit des Rohres betrachtet wird? | N |  |
| Wie groß darf die belastende Kraft höchstens werden, wenn die Festigkeit der gesamten Konstruktion betrachtet wird? | N |  |
| Wie groß darf die belastende Kraft höchstens werden, wenn entgegen der bisherigen Aufgabenstellung das Stützlager entfernt wird und die Festigkeit der gesamten Konstruktion betrachtet wird? | N |  |

# Kurbel

*Diese Aufgabe sollte vorzugsweise nach dem Vorlesungskapitel 1.4.4. behandelt werden.*

| 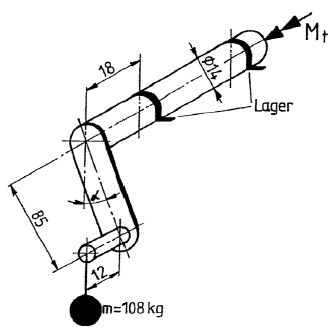 | Mit dem nebenstehend skizzierten Kurbeltrieb wird durch Drehung der Welle eine Masse von 108 kg kreisbogenförmig angehoben und wieder in die Ursprungsstellung abgesenkt. Der Vorgang vollzieht sich so langsam, dass er als quasistatisch angesehen werden kann.  An welcher Stelle wird die Welle am höchsten belastet?  O in der Lasteinleitungsebene  O in der Ebene des Kurbelarmes  O am linken Lager  O am rechten Lager |
| --- | --- |

Die Belastung der Welle ändert sich in Funktion des Stellungswinkels . Berechnen Sie für die in untenstehendem Schema spaltenweise aufgeführten Stellungswinkel die Zahlenwerte für den Querkraftschub Q, den Torsionsschub t, die Biegespannung b und die Vergleichsspannung V!

|  |  |  = 0° |  = 90° |  = 180° |  = 270° |
| --- | --- | --- | --- | --- | --- |
|  |  |  |  |  |  |
| Q | N |  |  |  |  |
| Mb | Nm |  |  |  |  |
| Mt | Nm |  |  |  |  |
| Q | N/mm² |  |  |  |  |
| b | N/mm² |  |  |  |  |
| t | N/mm² |  |  |  |  |
|  |  |  |  |  |  |
| V | N/mm² |  |  |  |  |

Die Welle besteht aus C45 (Biegewechselfestigkeit 410 N/mm²). Welche Sicherheit gegen Überlast liegt hier vor, wenn der gesamte Bewegungsablauf in die Betrachtung einbezogen werden soll?

# Achse Hubvorrichtung

*Diese Aufgabe sollte vorzugsweise nach dem Vorlesungskapitel 1.4.4. behandelt werden.*

| 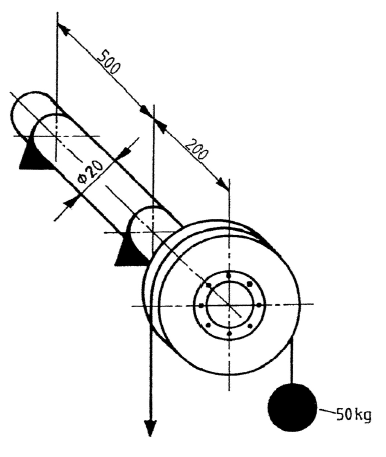 | Gegeben ist die nebenstehend skizzierte Achse eines Hubwerkes.  Kreuzen Sie an, an welcher Stelle die Achse ihr größtes Biegemoment erfährt!  O am hinteren Lager/Gelenk  O am vorderen Lager/Gelenk  O in der Seilebene |
| --- | --- |

Ermitteln Sie an der kritischen Stelle die Belastungen und Spannungen. Unterscheiden Sie dabei die beiden folgenden Fälle:

1. Die Achse ist an den bezeichneten Stellen am Gestell befestigt, dreht sich selber jedoch nicht. Die Drehung der Seilscheibe wird durch eine Lagerung zwischen Seilscheibe und Achse ermöglicht.
2. Die Achse ist an den bezeichneten Stellen im Gestell gelagert und dreht sich mit der Seilscheibe um.

|  |  | statisch | dynamisch |
| --- | --- | --- | --- |
| a. | Q [N] = | Qstat [N/mm²] = | Qdyn [N/mm²] = |
|  | Mb [Nm] = | bstat [N/mm²] = | bdyn [N/mm²] = |
|  |  | vstat [N/mm²] = | vdyn [N/mm²] = |

|  |  | statisch | dynamisch |
| --- | --- | --- | --- |
| b. | Q [N] = | Qstat [N/mm²] = | Qdyn [N/mm²] = |
|  | Mb [Nm] = | bstat [N/mm²] = | bdyn [N/mm²] = |
|  |  | vstat [N/mm²] = | vdyn [N/mm²] = |

# Belastbarkeit einer Achse in Abhängigkeit von der Lagerung II

Die unten stehenden vier Varianten einer Achse unterschieden sich zwar durch die Lagerung, sind aber allesamt aus dem gleichen Werkstoff gefertigt, der unter Berücksichtigung aller Konstruktionsparameter eine statische Biegespannung von 200 N/mm² und eine dynamische Biegespannung von 100 N/mm² zulässt. Der Querkraftschub ist zu vernachlässigen.

- Stellen Sie zunächst für jede der vier Varianten fest, ob die Biegespannung statisch oder dynamisch ist. Falschankreuzungen führen zu Punkteabzug!
- Berechnen Sie weiterhin das zulässige Biegemoment an der kritischen Stelle unter Berücksichtigung des dort vorliegenden Durchmessers.
- Ermitteln Sie schließlich die jeweils maximale Kraft, die auf die sich drehende Laufrolle ausgeübt werden kann.


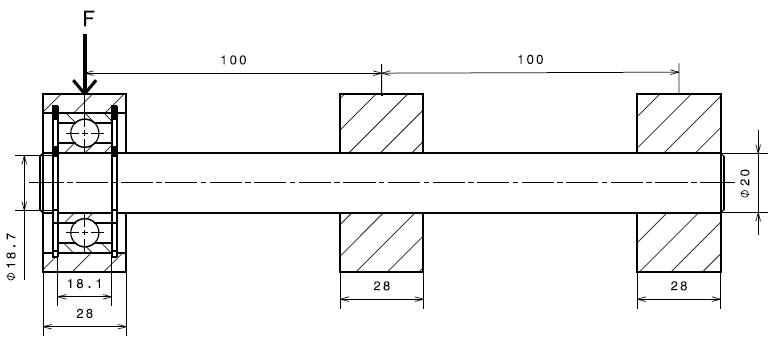


die Biegespannung in der Achse ist Mbzul [Nm] =

O statisch Fzul [N] =

O dynamisch


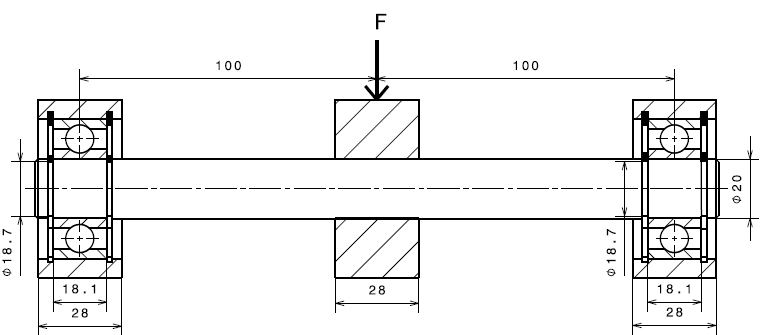


die Biegespannung in der Achse ist Mbzul [Nm] =

O statisch Fzul [N] =

O dynamisch


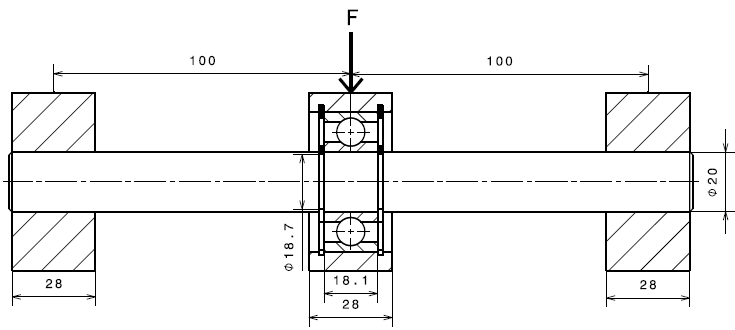


die Biegespannung in der Achse ist Mbzul [Nm] =

O statisch Fzul [N] =

O dynamisch


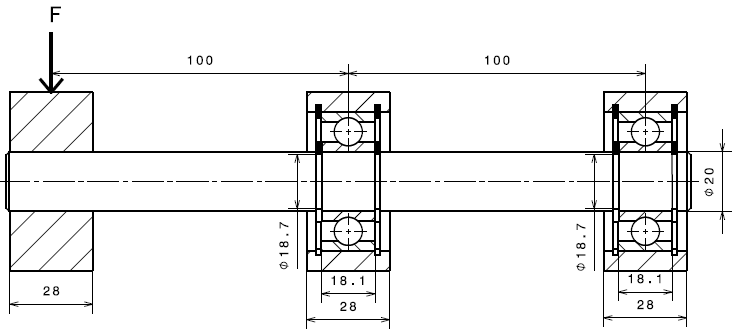


die Biegespannung in der Achse ist Mbzul [Nm] =

O statisch Fzul [N] =

O dynamisch

# Getriebewelle Zahnrad - Reibrad I ohne Dauerfestigkeitsnachweis

*Diese Aufgabe sollte vorzugsweise nach dem Vorlesungskapitel 1.4.4. behandelt werden.*

Gegeben ist die unten skizzierte Getriebewelle, die am rechten Ende ein Reibrad trägt. Mit der Getriebewelle wird eine Leistung von 18 kW bei einer Drehzahl von 2.960 min-1 übertragen. Der Reibwert an der Reibradpaarung beträgt 0,2.


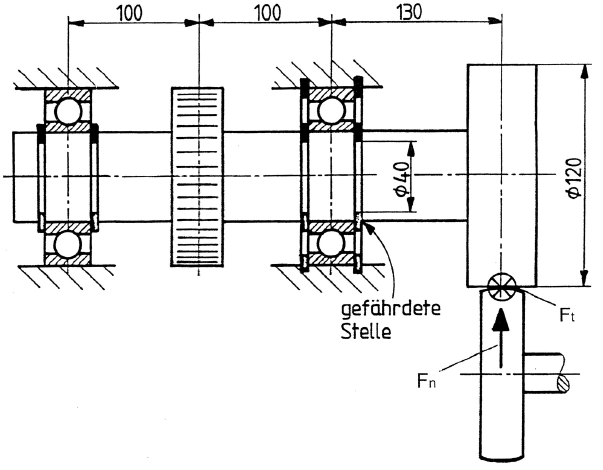


An der gekennzeichneten Stelle ist die statische und dynamische Vergleichsspannung zu ermitteln. Zur Sicherstellung von Zwischenergebnissen füllen Sie bitte die folgende Tabelle aus:

|  | statisch | dynamisch |
| --- | --- | --- |
| L [N] = | ZDstat [N/mm²] = | ZDdyn [N/mm²] = |
| Q [N] = | Qstat [N/mm²] = | Qdyn [N/mm²] = |
| Mb [Nm] = | bstat [N/mm²] = | bdyn [N/mm²] = |
| Mt [Nm] = | tstat [N/mm²] = | tdyn [N/mm²] = |
|  | vstat [N/mm²] = | vdyn [N/mm²] = |

Wenn es nicht gelingt, die genauen Zahlenwerte zu ermitteln, so sollten Sie zu klären versuchen, ob die jeweilige Belastung auftritt (ja) oder nicht (nein).

# Kurbelwelle, beidseitig gelagert

*Diese Aufgabe sollte vorzugsweise nach dem Vorlesungskapitel 1.4.4. behandelt werden.*

Die unten abgebildeten Kurbelwelle wird am Pleuel mit einer senkrecht nach unten gerichtete Kraft von 1.200 N belastet und das dadurch hervorgerufene Torsionsmoment wird auf der rechten Seite der Kurbelwelle querkraftfrei abgenommen. Es kann angenommen werden, dass die Pleuelkraft nur während der gesamten Abwärtsbewegung ausgeübt wird, während die Aufwärtsbewegung kraftlos erfolgt.


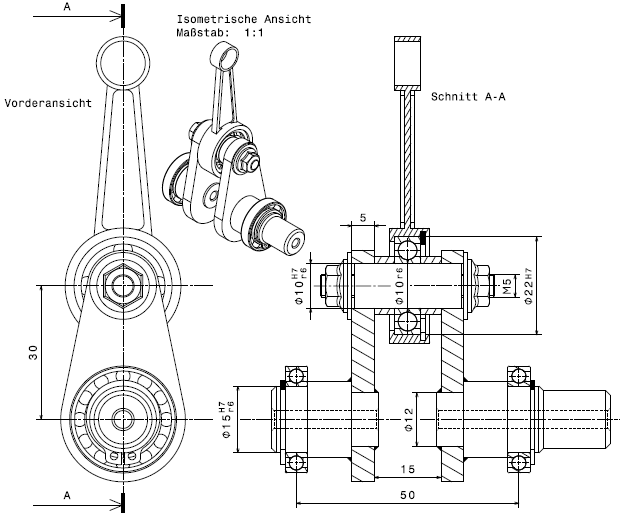


Welche Spannungen liegen im Bereich des linken Kurbelwellenlagers (Lagersitz Ø15) vor?

|  | statisch | dynamisch |
| --- | --- | --- |
| L [N] = | ZDstat [N/mm²] = | ZDdyn [N/mm²] = |
| Q [N] = | Qstat [N/mm²] = | Qdyn [N/mm²] = |
| Mb [Nm] = | bstat [N/mm²] = | bdyn [N/mm²] = |
| Mt [Nm] = | tstat [N/mm²] = | tdyn [N/mm²] = |
|  | vstat [N/mm²] = | vdyn [N/mm²] = |

Welche Spannungen liegen im Bereich des mittleren Pleuellagers (Lagersitz Ø10) vor? Die durch das Anziehen der Muttern M5 hervorgerufenen Belastungen bleiben dabei unberücksichtigt.

|  | statisch | dynamisch |
| --- | --- | --- |
| L [N] = | ZDstat [N/mm²] = | ZDdyn [N/mm²] = |
| Q [N] = | Qstat [N/mm²] = | Qdyn [N/mm²] = |
| Mb [Nm] = | bstat [N/mm²] = | bdyn [N/mm²] = |
| Mt [Nm] = | tstat [N/mm²] = | tdyn [N/mm²] = |
|  | vstat [N/mm²] = | vdyn [N/mm²] = |

Welche Spannungen liegen im Bereich des rechten Kurbelwellenlagers (Lagersitz Ø15) vor?

|  | statisch | dynamisch |
| --- | --- | --- |
| L [N] = | ZDstat [N/mm²] = | ZDdyn [N/mm²] = |
| Q [N] = | Qstat [N/mm²] = | Qdyn [N/mm²] = |
| Mb [Nm] = | bstat [N/mm²] = | bdyn [N/mm²] = |
| Mt [Nm] = | tstat [N/mm²] = | tdyn [N/mm²] = |
|  | vstat [N/mm²] = | vdyn [N/mm²] = |

# Dauerfestigkeitsnachweis Hubwerkwelle

*Diese Aufgabe sollte vorzugsweise nach dem Vorlesungskapitel 1.6. behandelt werden.*

Gegeben ist die unten skizzierte Hubtrommel, die mit einem Reibradgetriebe angetrieben wird. Die Reibzahl beträgt µ = 0,2. Es soll eine Last von 100kg quasistatisch angehoben werden. Die Belastung der Welle ist rechts neben Lager B zu untersuchen.


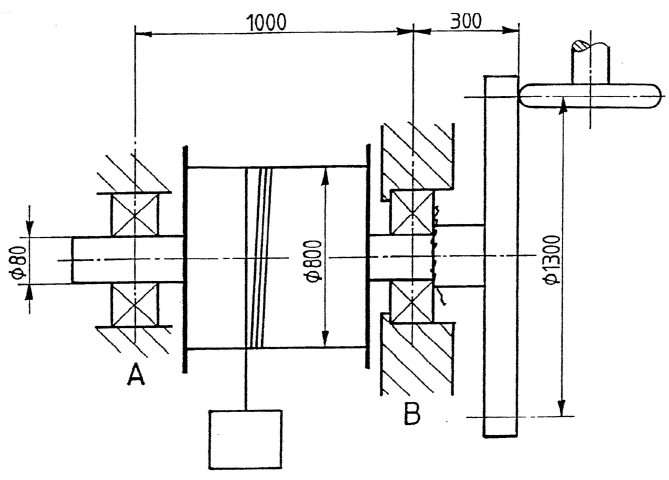


An der bezeichneten Stelle sind die Kräfte und Momente sowie die daraus resultierenden Spannungen zu ermitteln. Füllen Sie dazu folgendes Schema aus:

|  | statisch | dynamisch |
| --- | --- | --- |
| L [N] =  Q [N] =  Mb [Nm] =  Mt [Nm] = | ZDstat [N/mm²] =  Qstat [N/mm²] =  bstat [N/mm²] =  tstat [N/mm²] = | Zddyn [N/mm²] =  Qdyn [N/mm²] =  bdyn [N/mm²] =  tdyn [N/mm²] = |
|  | vstat [N/mm²] = | vdyn [N/mm²] = |

Wenn Sie keine Zahlenwerte ermitteln, so sollten Sie zumindest markieren, ob dieser Spannungsanteil auftritt (ja) oder nicht (nein).

Die Welle besteht aus dem Werkstoff St42. Der Oberflächenbeiwert beträgt 0,8 und die Kerbwirkungszahl 1,8. Zeichnen Sie das Dauerfestigkeitsschaubild!

|  | o |  |  |  |  |  |  |  |  |  |  |
| --- | --- | --- | --- | --- | --- | --- | --- | --- | --- | --- | --- |
|  |  |  |  |  |  |  |  |  |  |  |  |
|  |  |  |  |  |  |  |  |  |  |  |  |
|  |  |  |  |  |  |  |  |  |  |  |  |
|  |  |  |  |  |  |  |  |  |  |  |  |
|  |  |  |  |  |  |  |  |  |  |  |  |
|  |  |  |  |  |  |  |  |  |  |  |  |
|  |  |  |  |  |  |  |  |  |  |  |  |
|  |  |  |  |  |  |  |  |  |  |  |  |
|  |  |  |  |  |  |  |  |  |  |  |  |
|  |  |  |  |  |  |  |  |  |  |  | m |

Wie groß sind die folgenden Kenndaten aus dem Dauerfestigkeitsschaubild?

| bw |  | bSch |  | bS |  |
| --- | --- | --- | --- | --- | --- |
| bW‘ |  | bSch‘ |  | bS‘ |  |
| GbW |  | AK‘ |  | GAK |  |

| Welche Sicherheit muss ermittelt werden? | O statische Belastung steigt, dynamische Belastung bleibt konstant  O statische Belastung bleibt konstant, dynamische Belastung steigt  O statische und dynamische Belastung steigen |
| --- | --- |

| Wie groß ist die Sicherheit gegenüber Dauerbruch? | - |  |
| --- | --- | --- |
| Welche maximale Last kann befördert werden? | kg |  |

# Dauerfestigkeit Tretlagerwelle

*Diese Aufgabe sollte vorzugsweise nach dem Vorlesungskapitel 1.6. behandelt werden.*

Die unten dargestellte Tretlagerung eines Fahrrades ist auf Dauerfestigkeit zu untersuchen. Die höchste Belastung ist am Lager in Fahrtrichtung links zu erwarten, weil dort neben der Torsion die maximale Biegung auftritt. Die Welle weist an dieser Stelle einen Durchmesser von 17 mm auf.


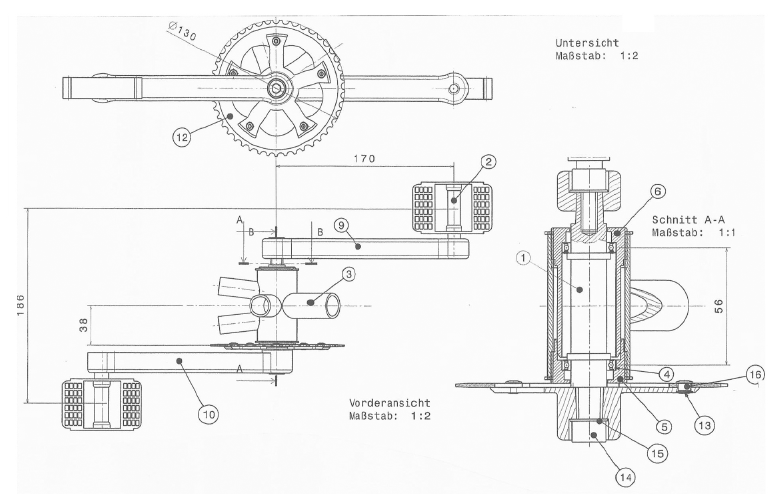


Die größte Belastung tritt dann auf, wenn sich der Radfahrer mit seinem ganzen Gewicht von 60 kg zentrisch auf dem linken Pedal abstützt. Sicherheitshalber wird angenommen, dass maximale Querkraft, maximale Torsion und maximale Biegung gleichzeitig auftreten und dass die Belastung wechselnd ist. Dadurch wird ein Dauerfestigkeitsschaubild überflüssig.

Berechnen Sie zunächst die Belastungen und die sich daraus ergebenden Spannungen sowie die Vergleichsspannung.

| Q | N |  | Qdyn | N/mm² |  |
| --- | --- | --- | --- | --- | --- |
| Mb | Nm |  | bdyn | N/mm² |  |
| Mt | Nm |  | tdyn | N/mm² |  |
|  |  |  | vdyn | N/mm² |  |

Die Welle besteht aus dem Werkstoff 42CrMo4 und ist geschlichtet. Es kann eine Kerbwirkungszahl von 1,5 angenommen werden.

| Notieren Sie die Biegewechselfestigkeit des Werkstoffs! | bw | N/mm² |  |
| --- | --- | --- | --- |
| Wie groß ist die Biegewechselfestigkeit unter Berücksichtigung des Größeneinflusses | bW‘ | N/mm² |  |
| Wie groß ist die Gestaltbiegewechselfestigkeit? | GbW | N/mm² |  |

| Wie groß ist die Sicherheit gegenüber Dauerbruch? | - |  |
| --- | --- | --- |
| Wie schwer darf der Radfahrer maximal werden, wenn in jedem Fall Dauerfestigkeit gewährleistet werden soll? | kg |  |
