# Supplementary material
Source: publisher site journal article supplement (https://www.degruyterbrill.com/publication/isbn/9783110692143/downloadAsset/9783110692143_Zusatzmaterial_Basiswissen.zip)
Supplement: Supplementary file 4 [file Basiswissen, Zusatzaufgaben Kapitel 1, Lösungen.doc]

Hochschule Trier, Fachbereich Technik

Prof. Dr.-Ing. Hubert Hinzen

Maschinenelemente Kapitel 1

Achsen, Wellen, Betriebsfestigkeit

Aufgabensammlung B

Lösungen

Stand: 30.03.2020

Inhalt

[1 Aufhängevorrichtung 2](#__RefHeading___Toc36457398)

[2 Haltevorrichtung I 3](#__RefHeading___Toc36457399)

[3 Rollenlaufbahn 4](#__RefHeading___Toc36457400)

[3.1 Dimensionierung des Profils 4](#__RefHeading___Toc36457401)

[3.2 Belastung der Rollenachse 4](#__RefHeading___Toc36457402)

[3.3 Belastung des Verbindungsbolzens 4](#__RefHeading___Toc36457403)

[4 Haltevorrichtung II 6](#__RefHeading___Toc36457404)

[5 Kurbel 7](#__RefHeading___Toc36457405)

[6 Achse Hubvorrichtung 8](#__RefHeading___Toc36457406)

[7 Belastbarkeit einer Achse in Abhängigkeit von der Lagerung II 9](#__RefHeading___Toc36457407)

[8 Getriebewelle Zahnrad - Reibrad ohne Dauerfestigkeitsnachweis I 10](#__RefHeading___Toc36457408)

[9 Kurbelwelle, beidseitig gelagert 11](#__RefHeading___Toc36457409)

[10 Dauerfestigkeitsnachweis Hubwerkwelle 13](#__RefHeading___Toc36457410)

[11 Dauerfestigkeit Tretlagerwelle 15](#__RefHeading___Toc36457411)

# Aufhängevorrichtung

A = 4.530 mm², Wax = 295.000 mm³

Lösung:

Z = = 11,04 N/mm²; b = = 101,7 N/mm²

ges = Z + b = 112,7 N/mm²

# Haltevorrichtung I

mit Lagerbock

Torsionsschub Rohr:

Biegespannung Rechteckrohr:

Vergleichsspannung Rohr:

Vergleichsspannung Rechteckrohr:

|  |  |  | Rohr 1 | Rechteckrohr 2 |
| --- | --- | --- | --- | --- |
| Torsionsschub | τt | N/mm² | 67,5 | 0 |
| Biegespannung | σb | N/mm² | 0 | 120,4 |
|  |  |  |  |  |
| Vergleichsspannung | σV | N/mm² | 116,9 | 120,4 |

ohne Lagerbock

Belastung des Rechteckrohres wie zuvor

Torsionsschub des Rohres wie zuvor

Biegespannung Rohr:

Vergleichsspannung Rohr:

|  |  |  | Rohr 1 | Rechteckrohr 2 |
| --- | --- | --- | --- | --- |
| Torsionsschub | τt | N/mm² | 67,5 | 0 |
| Biegespannung | σb | N/mm² | 101,2 | 120,4 |
|  |  |  |  |  |
| Vergleichsspannung | σV | N/mm² | 154,6 | 120,4 |

# Rollenlaufbahn

## Dimensionierung des Profils

I 160: Wax = 117 * 103 mm3 laut Tabelle Bild 0.12

→

→

## Belastung der Rollenachse

→ Fax = 437 N

Die Kraft Fax wird formschlüssig abgestützt und belastet deshalb die kritische Stelle der Rollenachse nicht auf Längskraft. Allerdings hat diese Kraft einen Anteil an der Biegemomentenbelastung der Achse.

| FV [N] = L [N] | Z [N/mm²] = 100 |
| --- | --- |
| Q [N] = 3.110 | Q [N/mm²] = 15,5 |
| Mb [Nm]= 31,7 | b [N/mm²] = 78,9 |
|  | V [N/mm²] = 180,9 |

## Belastung des Verbindungsbolzens

Der verbindungsbolzen wird durch zwei Rollen belastet.

L = 437,1 N * 2 = 874,2 N Q = 3.110 N * 2 = 6.220 N

Seitenlasche - Bolzen:

Mb = 874,2 N * 27 mm + 6.220 N * 14 mm = 110,6 Nm

Sicherheitshalber wird angenommen, dass sich das Biegemoment auf dem Durchmesser von 16 mm abstützt:

Bolzenmitte:

Mb = 6.220 N * (37 -14) mm - 874 N * 27 mm = 119,4 Nm

| Verbindungsstelle Seitenlasche – Bolzen | | Bolzenmitte | |
| --- | --- | --- | --- |
| FV [N] | Z [N/mm²] = 100 |  |  |
| L [N] = 874,2 | Z [N/mm²] = 4,3 | L [N] = 874,2 | Z [N/mm²] = 2,8 |
| Q [N] = 6.220 | Q [N/mm²] = 30,9 | Q [N] = 6.220 | Q [N/mm²] = 19,8 |
| Mb [Nm]= 110,6 | b [N/mm²] = 275 | Mb [Nm]= 119,4 | b [N/mm²] = 152,1 |
|  | V [N/mm²] = 383 |  | V [N/mm²] = 158,6 |

# Haltevorrichtung II

Belastung ausschließlich auf Biegung

| Wie groß darf die belastende Kraft höchstens werden, wenn ausschließlich die Belastbarkeit des Hebels mit quadratischem Querschnitt betrachtet wird? | N | 562,5 |
| --- | --- | --- |

Belastung ausschließlich auf Torsion

| Wie groß darf die belastende Kraft höchstens werden, wenn ausschließlich die Belastbarkeit des Rohres betrachtet wird? | N | 240,2 |
| --- | --- | --- |

Der kleinere der beiden Werte ist maßgebend

| Wie groß darf die belastende Kraft höchstens werden, wenn die Festigkeit der gesamten Konstruktion betrachtet wird? | N | 240,2 |
| --- | --- | --- |

Die Vergleichsspannung an der Verbindungsstelle zur Wand ist maßgebend

s.o.

| Wie groß darf die belastende Kraft höchstens werden, wenn entgegen der bisherigen Aufgabenstellung das Stützlager entfernt wird und die Festigkeit der gesamten Konstruktion betrachtet wird? | N | 149.7 |
| --- | --- | --- |

# Kurbel

G = m * g = 108 kg * 9,81 m/s² = 1.059 N

An welcher Stelle wird die Welle am höchsten belastet?

O in der Lasteinleitungsebene

O in der Ebene des Kurbelarmes

**** am linken Lager

O am rechten Lager

für alle Stellungen

für alle Stellungen

für alle Stellungen

für  = 90° und  = 270°

für  = 90° und  = 270°

für  = 0° und  = 180°

für  = 90° und  = 270°

|  |  |  = 0° |  = 90° |  = 180° |  = 270° |
| --- | --- | --- | --- | --- | --- |
|  |  |  |  |  |  |
| Q | N | 1.059 | 1.059 | 1.059 | 1.059 |
| Mb | Nm | 31,77 | 31,77 | 31,77 | 31,77 |
| Mt | Nm | 0 | 90,02 | 0 | 90,02 |
| Q | N/mm² | 6,9 | 6,9 | 6,9 | 6,9 |
| b | N/mm² | 117,9 | 117,9 | 117,9 | 117,9 |
| t | N/mm² | 0 | 167,1 | 0 | 167,1 |
|  |  |  |  |  |  |
| V | N/mm² | 118,5 | 323,6 | 118,5 | 323,6 |

zul = 410 N/mm²  S = = 1,27

# Achse Hubvorrichtung

Kreuzen Sie an, an welcher Stelle die Achse ihr größtes Biegemoment erfährt!

O am hinteren Lager/Gelenk

 am vorderen Lager/Gelenk

O in der Seilebene

Querkraft:

Querkraftschub:

Biegemoment:

Biegespannung:

**Fall a. (stillstehende Achse):**

Belastung wirkt statisch, weil sowohl die Querkraft als auch das Biegemoment zur stillstehenden Achse stets die gleiche Winkelstellung einnimmt

**Fall b. (drehende Achse):**

Belastung wirkt dynamisch, weil die Richtung von Querkraft und Biegemoment zur sich drehenden Welle ständig ändert (Umlaufbiegung).

|  |  | statisch | dynamisch |
| --- | --- | --- | --- |
| a. | Q [N] = 981 | Qstat [N/mm²] = 3,1 | Qdyn [N/mm²] = 0 |
|  | Mb [Nm] = 196,2 | bstat [N/mm²] = 249,8 | bdyn [N/mm²] = 0 |
|  |  | vstat [N/mm²] = 249,9 | vdyn [N/mm²] = 0 |

|  |  | statisch | dynamisch |
| --- | --- | --- | --- |
| b. | Q [N] = 981 | Qstat [N/mm²] = 0 | Qdyn [N/mm²] = 3,1 |
|  | Mb [Nm] = 196,2 | bstat [N/mm²] = 0 | bdyn [N/mm²] = 249,8 |
|  |  | vstat [N/mm²] = 0 | vdyn [N/mm²] = 249,9 |

=

# Belastbarkeit einer Achse in Abhängigkeit von der Lagerung II

Konstruktionsvariante 1:

→

→

die Biegespannung in der Achse ist Mbzul [Nm] = 157,1

**** statisch Fzul [N] = 1.826

O dynamisch

Konstruktionsvariante 2:

→

die Biegespannung in der Achse ist Mbzul [Nm] = 78,5

O statisch Fzul [N] = 1.826

**** dynamisch

Konstruktionsvariante 3:

→

die Biegespannung in der Achse ist Mbzul [Nm] = 128,4

**** statisch Fzul [N] = 2.824

O dynamisch

Konstruktionsvariante 4:

→

die Biegespannung in der Achse ist Mbzul [Nm] = 64,2

O statisch Fzul [N] = 706

**** dynamisch

# Getriebewelle Zahnrad - Reibrad ohne Dauerfestigkeitsnachweis I

|  | statisch | dynamisch |
| --- | --- | --- |
| L [N] = 0 | ZDstat [N/mm²] = 0 | ZDdyn [N/mm²] = 0 |
| Q [N] = 4.936 | Qstat [N/mm²] = 0 | Qdyn [N/mm²] = 3,9 |
| Mb [Nm] = 641,5 | bstat [N/mm²] = 0 | bdyn [N/mm²] = 102,1 |
| Mt [Nm] = 58,1 | tstat [N/mm²] = 4,6 | tdyn [N/mm²] = 0 |
|  | vstat [N/mm²] = 8,0 | vdyn [N/mm²] = 102,3 |

# Kurbelwelle, beidseitig gelagert

Spannungen im Bereich des linken Kurbelwellenlagers

wechselnd

keine Biegung

keine Torsion

|  | statisch | dynamisch |
| --- | --- | --- |
| L [N] = 0 | ZDstat [N/mm²] = 0 | ZDdyn [N/mm²] = 0 |
| Q [N] = 600 | Qstat [N/mm²] = 0 | Qdyn [N/mm²] = 3,4 |
| Mb [Nm] = 0 | bstat [N/mm²] = 0 | bdyn [N/mm²] = 0 |
| Mt [Nm] = 0 | tstat [N/mm²] = 0 | tdyn [N/mm²] = 0 |
|  | vstat [N/mm²] = 0 | vdyn [N/mm²] = 5,9 |

Spannungen im Bereich des mittleren Pleuellagers

wechselnd

Umlaufbiegung

keine Torsion

|  | statisch | dynamisch |
| --- | --- | --- |
| L [N] = 0 | ZDstat [N/mm²] = 0 | ZDdyn [N/mm²] = 0 |
| Q [N] = 600 | Qstat [N/mm²] = 0 | Qdyn [N/mm²] = 7,6 |
| Mb [Nm] = 15,0 | bstat [N/mm²] = 0 | bdyn [N/mm²] = 152,8 |
| Mt [Nm] = 0 | tstat [N/mm²] = 0 | tdyn [N/mm²] = 0 |
|  | vstat [N/mm²] = 0 | vdyn [N/mm²] = 153,4 |

Spannungen im Bereich des rechten Kurbelwellenlagers

wechselnd

keine Biegung

schwellend, also je zur Hälfte statisch und dynamisch

|  | statisch | dynamisch |
| --- | --- | --- |
| L [N] = 0 | ZDstat [N/mm²] = 0 | ZDdyn [N/mm²] = 0 |
| Q [N] = 600 | Qstat [N/mm²] = 0 | Qdyn [N/mm²] = 3,4 |
| Mb [Nm] = 0 | bstat [N/mm²] = 0 | bdyn [N/mm²] = 0 |
| Mt [Nm] = 36 | tstat [N/mm²] = 27,2 | tdyn [N/mm²] = 27,2 |
|  | vstat [N/mm²] = 47,0 | vdyn [N/mm²] = 53,0 |

# Dauerfestigkeitsnachweis Hubwerkwelle

Hubkraft

an der Reibscheibe:

 wird aber nicht als Längskraft an der gefährdeten Stelle wirksam, weil diese Kraft vorher über das Lager abgestützt wird

sowohl in der Zeichenebene als auch senkrecht dazu wird ein Biegemoment wirksam:

wird dynamisch wirksam, weil die Kraftrichtung relativ zu der sich drehenden Welle ständig wechselt

wird dynamisch wirksam, weil die Momentenrichtung relativ zu der sich drehenden Welle ständig wechselt

wird statisch wirksam, weil das Moment unabhängig von der Stellung der Welle ständig wirksam ist

|  | statisch | dynamisch |
| --- | --- | --- |
| L [N] = 0  Q [N] = 603,7  Mb [Nm] = 1.970  Mt [Nm] = 392,4 | ZDstat [N/mm²] = 0  Qstat [N/mm²] = 0  bstat [N/mm²] = 0  tstat [N/mm²] = 3,9 | Zddyn [N/mm²] = 0  Qdyn [N/mm²] = 0,1  bdyn [N/mm²] = 39,1  tdyn [N/mm²] = 0 |
|  | vstat [N/mm²] = 6,7 | vdyn [N/mm²] = 39,1 |

St42: Rm = 420 ... 500 N/mm²

bS = 380 N/mm² bSch = 380 N/mm² bW = 220 N/mm²

erste Verkleinerung: bG = 0,74

bS‘ = bS * bG = 380 N/mm² * 0,74 = 281 N/mm²

Sch‘ = bSch * bG = 380 N/mm² * 0,74 = 281 N/mm²

W‘ = W * bG = 220 N/mm² * 0,74 = 163 N/mm²

zweite Verkleinerung: bO = 0,8 k = 1,8

bei Überlast werden sowohl die statische als auch die dynamische Vergleichsspannung erhöht

ablesen: (Vstat +σVdyn)zul = 84 N/mm²

mmax = 100 kg * 1,83 = 183 kg

| bw | 380 | bSch | 380 | bS | 220 |
| --- | --- | --- | --- | --- | --- |
| bW‘ | 281 | bSch‘ | 281 | bS‘ | 163 |
| GbW | 72 | AK‘ | 141 | GAK | 62 |

| Welche Sicherheit muss ermittelt werden? | O statische Belastung steigt, dynamische Belastung bleibt konstant  O statische Belastung bleibt konstant, dynamische Belastung steigt  X statische und dynamische Belastung steigen |
| --- | --- |

| Wie groß ist die Sicherheit gegenüber Dauerbruch? | - | 1,83 |
| --- | --- | --- |
| Welche maximale Last kann befördert werden? | kg | 183 |

# Dauerfestigkeit Tretlagerwelle

| Q | N | 589 | Qdyn | N/mm² | 2,6 |
| --- | --- | --- | --- | --- | --- |
| Mb | Nm | 38,3 | bdyn | N/mm² | 79,3 |
| Mt | Nm | 100 | tdyn | N/mm² | 103 |
|  |  |  | vdyn | N/mm² | 201 |

Werkstoff 42CrMo4 bw = 450 N/mm²

erste Verkleinerung: 17 mm  bG = 0,95 (Bild 1.18, S. 101)

bW‘ = bG * bW = 0,95 * 450 N/mm² = 427 N/mm²

zweite Verkleinerung: Aufgabenstellung: k = 1,5

Bild 1.22, S. 107: bO = 0,85

GbW = * bW‘ = * 427 N/mm² = 242 N/mm²

| Notieren Sie die Biegewechselfestigkeit des Werkstoffs! | bw | N/mm² | 450 |
| --- | --- | --- | --- |
| Wie groß ist die Biegewechselfestigkeit unter Berücksichtigung des Größeneinflusses | bW‘ | N/mm² | 427 |
| Wie groß ist die Gestaltbiegewechselfestigkeit? | GbW | N/mm² | 242 |

| Wie groß ist die Sicherheit gegenüber Dauerbruch? | - | 1,20 |
| --- | --- | --- |
| Wie schwer darf der Radfahrer maximal werden, wenn in jedem Fall Dauerfestigkeit gewährleistet werden soll? | kg | 72,2 |
