# Supplementary material
Source: publisher site journal article supplement (https://www.degruyterbrill.com/publication/isbn/9783110692143/downloadAsset/9783110692143_Zusatzmaterial_Basiswissen.zip)
Supplement: Supplementary file 5 [file Basiswissen, Zusatzaufgaben Kapitel 2, Aufgaben.doc]

Hochschule Trier, Fachbereich Technik

Prof. Dr.-Ing. Hubert Hinzen

Maschinenelemente Kapitel 2

Federn und weitere elastische Verformungen

Aufgabensammlung B

Stand: 30.03.2020

Inhalt

[1 Optimierung Zug-/Druckfedern 2](#__RefHeading___Toc36458134)

[2 Drehstabfeder - rohrförmige Feder I 4](#__RefHeading___Toc36458135)

[3 Schraubenzugfeder II 5](#__RefHeading___Toc36458136)

[4 Schraubenzugfeder unter Volllast und Teillast II 6](#__RefHeading___Toc36458137)

[5 Schraubenzugfeder unter Volllast und Teillast III 7](#__RefHeading___Toc36458138)

[6 Abfederung Krankatze II 8](#__RefHeading___Toc36458139)

[7 Schraubenzugfeder, Variation des Windungsdurchmessers 9](#__RefHeading___Toc36458140)

# Optimierung Zug-/Druckfedern

Ein Federwerkstoff weist folgende Werkstoffkenndaten auf:

σzul = 840 N/mm² E = 210.000 N/mm²

Mit diesem Werkstoff soll eine Zug-/Druckfeder ausgestattet werden, die nach unten stehender Skizze aus drei ineinander geschachtelten Rohren besteht: Das innere Rohr wird von oben auf Druck belastet und stützt sich am unteren Ende auf dem Kragen eines umgebenden Rohres ab, welches durch die gleiche Kraft auf Zug belastet wird. Das Zugrohr ist am oberen Ende in ähnlicher Weise mit einem äußeren Rohr verbunden, welches seinerseits dann wieder als Druckfeder belastet wird. Die beiden Varianten A und B unterscheiden sich durch die Wandstärke der Rohre.

Berechnen Sie für beide Fälle sowohl für die einzelnen Rohre als auch für die gesamte Konstruktion

- die Belastbarkeiten
- die Steifigkeiten

Ermitteln Sie dann die speicherbare Arbeiten

- für jede Feder einzeln mit der jeweiligen Einzelbelastbarkeit
- für das Gesamtsystem mit der Gesamtbelastbarkeit

|  | links | | | | rechts | | | |
| --- | --- | --- | --- | --- | --- | --- | --- | --- |
|  | innen | Mitte | außen | gesamt | innen | Mitte | außen | gesamt |
| Fmax [N]  c [N/µm]  W [Nm] |  |  |  |  |  |  |  |  |


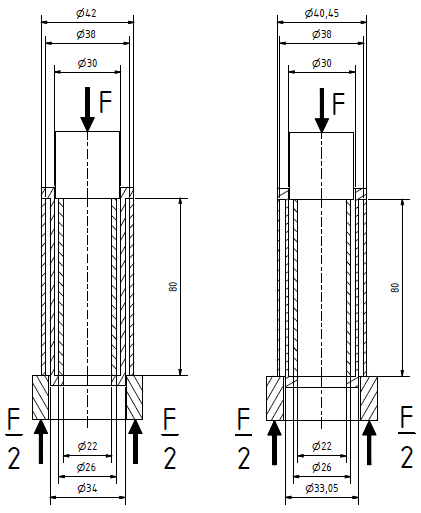


# Drehstabfeder - rohrförmige Feder I

*Diese Aufgabe sollte vorzugsweise nach dem Vorlesungskapitel 2.2.1. behandelt werden.*

Gegeben ist die untenstehend skizzierte Federkonstruktion, die aus einer Drehstabfeder besteht, die von einer rohrförmigen Feder umgeben ist. Das Torsionsmoment wird von links in die Drehstabfeder eingeleitet, welche am rechten Ende über eine Kopfplatte mit dem Rohr verbunden ist. Dieses Rohr stützt sich am linken Ende an der Umgebungskonstruktion ab.


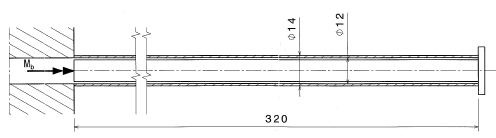


E = 210.000 N/mm² zul = 900 N/mm²

G = 70.000 N/mm² zul = 720 N/mm²

Im Sinne einer optimalen Werkstoffausnutzung ist der Außendurchmesser der Drehstabfeder so zu dimensionieren, dass die Drehstabfeder und die Rohrfeder die gleiche Materialbelastung erfahren.

Ermitteln Sie die unten aufgeführten Kenngrößen der Federkombination.

|  |  | Drehstabfeder | Rohrfeder | Gesamtsystem |
| --- | --- | --- | --- | --- |
| Innendurchmesser | di [mm] | 0 | 12 | ------------- |
| Außendurchmesser | da [mm] |  | 14 | ------------- |
| Belastbarkeit | Mtmax [Nm] |  |  |  |
| Steifigkeit | ct [Nm] |  |  |  |
| speicherbare Arbeit | Wmax [Nm] |  |  |  |

# Schraubenzugfeder II

*Diese Aufgabe sollte vorzugsweise nach dem Vorlesungskapitel 2.2.2.2. behandelt werden.*

| 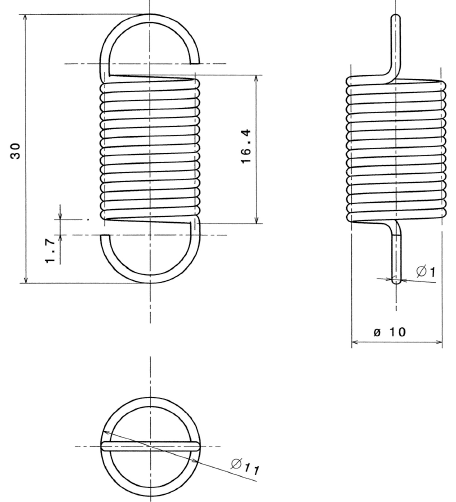 | Die nebenstehende Abbildung zeigt eine Schraubenzugfeder in allen ihren Abmessungen.  Die Feder besteht aus Stahl, hat 15 federnde Windungen und weist folgende Werkstoffdaten auf:  E = 210.000 N/mm²  G = 85.000 N/mm²  zul = 840 N/mm²  zul = 660 N/mm² |
| --- | --- |

| Welche maximale Zugkraft kann in die Feder eingeleitet werden? | Fmax [N] = |  |
| --- | --- | --- |
| Wie groß ist die Steifigkeit  dieser Feder? | c [N/mm] = |  |
| Um welchen maximalen Federweg darf die Feder ausgelenkt werden? | fmax [mm] = |  |
| Wie groß ist die Arbeit, die maximal in dieser Feder gespeichert werden kann? | Wmax [Nm] = |  |
| Um welchen Federweg lenkt sich die Feder aus, wenn sie mit 15 N belastet wird? | f(15 N) [mm] = |  |
| Welche Kraft stellt sich ein, wenn die Feder um 25 mm ausgelenkt wird? | F(25 mm) [N] = |  |

# Schraubenzugfeder unter Volllast und Teillast II

*Diese Aufgabe sollte vorzugsweise nach dem Vorlesungskapitel 2.2.2.2. behandelt werden.*

| 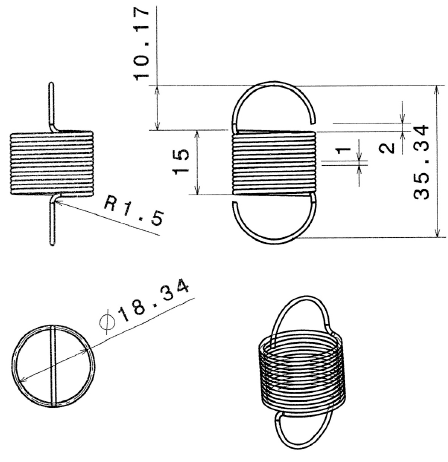 | Die nebenstehende Abbildung zeigt eine Schraubenzugfeder in allen ihren Abmessungen.  Die Feder besteht aus Stahl und weist folgende Werkstoffdaten auf:  E = 210.000 N/mm²  G = 85.000 N/mm²  zul = 600 N/mm²  zul = 520 N/mm² |
| --- | --- |

1. Welche maximale Zugkraft kann in die Feder eingeleitet werden? Wie groß ist dann der Federweg f und die in der Feder gespeicherte Arbeit W?
2. Um welchen Federweg lenkt sich die Feder aus, wenn sie mit 5 N belastet wird? Welche Arbeit wird dann gespeichert?
3. Die Feder wird um 20 mm ausgelenkt. Welche Kraft stellt sich ein und welche Arbeit wird gespeichert?
4. In der Feder wird eine Arbeit von 300 Nmm gespeichert. Welche Kraft F ist dazu erforderlich und welcher Federweg f stellt sich ein?

|  | Aufgabenteil a | Aufgabenteil b | Aufgabenteil c | Aufgabenteil d |
| --- | --- | --- | --- | --- |
|  | Volllast | Teillast mit | Teillast mit | Teillast mit |
| F [N] |  | 5 |  |  |
| f [mm] |  |  | 20 |  |
| W [Nmm] |  |  |  | 300 |

# Schraubenzugfeder unter Volllast und Teillast III

| 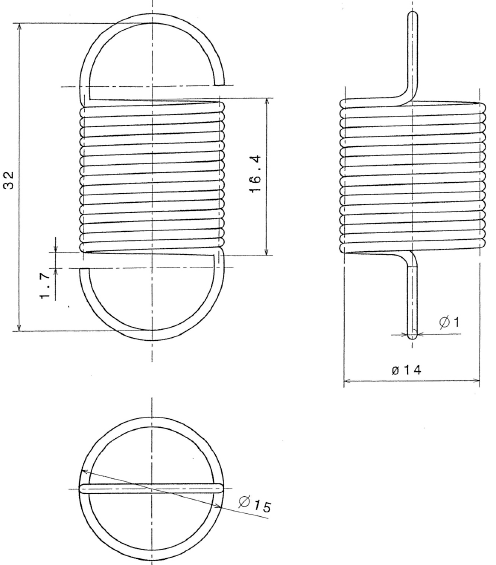 | Die nebenstehende Abbildung zeigt eine Schraubenzugfeder in allen ihren Abmessungen.  Die Feder besteht aus Stahl und weist folgende Werkstoffdaten auf:  E = 210.000 N/mm²  G = 85.000 N/mm²  zul = 640 N/mm²  zul = 560 N/mm² |
| --- | --- |

1. Welche maximale Zugkraft kann in die Feder eingeleitet werden? Wie groß ist dann der Federweg f und die in der Feder gespeicherte Arbeit W?
2. Um welchen Federweg lenkt sich die Feder aus, wenn sie mit 10 N belastet wird? Welche Arbeit wird dann gespeichert?
3. Die Feder wird um 20 mm ausgelenkt. Welche Kraft stellt sich ein und welche Arbeit wird gespeichert?
4. In der Feder wird eine Arbeit von 300 Nmm gespeichert. Welche Kraft F ist dazu erforderlich und welcher Federweg f stellt sich ein?

|  | Aufgabenteil a | Aufgabenteil b | Aufgabenteil c | Aufgabenteil d |
| --- | --- | --- | --- | --- |
|  | Volllast | Teillast mit | Teillast mit | Teillast mit |
| F [N] |  | 10 |  |  |
| f [mm] |  |  | 20 |  |
| W [Nmm] |  |  |  | 300 |

# Abfederung Krankatze II

*Diese Aufgabe sollte vorzugsweise nach dem Vorlesungskapitel 2.2.2.2. behandelt werden.*

| 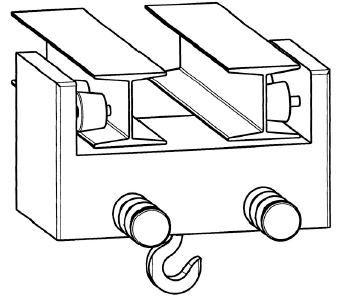 | Die nebenstehend skizzierte Katze eines Kranes hat eine Masse von 265 kg. Die am Haken transportierte Nutzlast von 1,2 t wird im ungünstigsten Fall in der oberen Endstellung des Hakens transportiert, so dass beide Massen in horizontaler Richtung zu bewegen sind. Die Katze prallt bei ausgeschaltetem Motor mit einer Geschwindigkeit von 2 m/s gegen einen festen Anschlag, wobei ein zentrischer Stoß angenommen werden kann. Sowohl an der Stirnseite der Katze als auch am stationären Anschlag am Ende der Laufbahn sind je zwei federnde Puffern angebracht. |
| --- | --- |

Die Schraubenfedern haben 17 federnde Windungen, der Drahtdurchmesser beträgt 20 mm, der mittlere Windungsdurchmesser 100 mm. Der Schubmodul des Federwerkstoffs wird mit 70.000 N/mm² angegeben. Die Belastung dieser Feder soll ermittelt werden. Gehen Sie dabei sinnvollerweise folgendermaßen vor:

| Welche Arbeit muss die einzelne Feder beim Aufprall aufnehmen? | W | Nm |  |
| --- | --- | --- | --- |
| Berechnen Sie die Steifigkeit der oben beschriebenen Feder. | c | N/mm |  |
| Mit welcher Kraft wird die Feder während des Stoßes belastet? | Fmax | N |  |
| Wie hoch ist dann die Schubspannung in der Feder? | max | N/mm² |  |

# Schraubenzugfeder, Variation des Windungsdurchmessers

*Diese Aufgabe sollte vorzugsweise nach dem Vorlesungskapitel 2.2.2.2. behandelt werden.*

Für die unten abgebildeten Schraubenfedern gelten folgende Daten:

zulässige Schubspannung zul = 760 N/mm²

Schubmodul G = 85.000 N/mm²

Drahtdurchmesser d = 2 mm (für alle Federn)

Anzahl der federnden Windungen iW = 24 (für alle Federn)

Die einzelnen Federn unterscheiden sich nur durch den Windungsdurchmesser.

Ermitteln Sie den Wahl’schen Faktor K, die Belastbarkeit der Feder Fmax, die Federsteifigkeit c sowie die in der Feder speicherbare Arbeit W. Bedienen Sie sich bei der Darstellung der Ergebnisse des untenstehenden Schemas. Alle Zahlenwerte sind mit einer dreistelligen Genauigkeit anzugeben.

|  |  | Dm = 4 mm | Dm = 8 mm | Dm = 16 mm | Dm = 32 mm | Dm = 64 mm |
| --- | --- | --- | --- | --- | --- | --- |
|  |  | 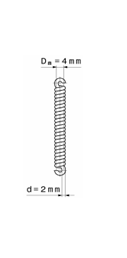 | 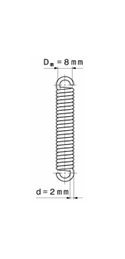 | 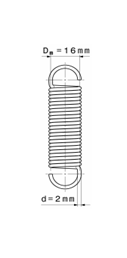 | 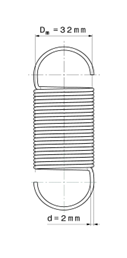 | 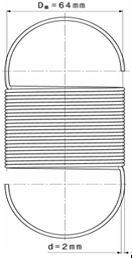 |
| K | - |  |  |  |  |  |
| Fmax | N |  |  |  |  |  |
| c | N/mm |  |  |  |  |  |
| Wmax | Nm |  |  |  |  |  |
