# Supplementary material
Source: publisher site journal article supplement (https://www.degruyterbrill.com/publication/isbn/9783110692143/downloadAsset/9783110692143_Zusatzmaterial_Basiswissen.zip)
Supplement: Supplementary file 6 [file Basiswissen, Zusatzaufgaben Kapitel 2, Lösungen.doc]

Hochschule Trier, Fachbereich Technik

Prof. Dr.-Ing. Hubert Hinzen

Maschinenelemente Kapitel 2

Federn und weitere elastische Verformungen

Aufgabensammlung B

Lösungen

Stand: 30.03.2020

Inhalt

[1 Optimierung Zug-/Druckfedern 2](#__RefHeading___Toc36458568)

[2 Drehstabfeder - rohrförmige Feder I 4](#__RefHeading___Toc36458569)

[3 Schraubenzugfeder II 5](#__RefHeading___Toc36458570)

[4 Schraubenzugfeder unter Volllast und Teillast II 6](#__RefHeading___Toc36458571)

[5 Schraubenzugfeder unter Volllast und Teillast III 7](#__RefHeading___Toc36458572)

[6 Abfederung Krankatze II 8](#__RefHeading___Toc36458573)

[7 Schraubenzugfeder, Variation des Windungsdurchmessers 9](#__RefHeading___Toc36458574)

# Optimierung Zug-/Druckfedern

links:













Es liegt eine Hintereinanderschaltung von drei Federn (inneres, mittleres und äußeres Rohr) vor.

cges = 168.4 N/µm









rechts:













Es liegt eine Hintereinanderschaltung von drei Federn (inneres, mittleres und äußeres Rohr) vor.

cges = 132,1 N/µm









|  | links | | | | rechts | | | |
| --- | --- | --- | --- | --- | --- | --- | --- | --- |
|  | innen | Mitte | außen | gesamt | innen | Mitte | außen | gesamt |
| Fmax [N] | 126.669 | 168.892 | 211.115 | 126.669 | 126.669 | 126.869 | 126.803 | 126.669 |
| c [N/µm] | 395,8 | 527,8 | 659,7 | 168.4 | 395,8 | 396,5 | 396,2 | 132,1 |
| W [Nm] | 20,27 | 27,02 | 33,78 | 47,64 | 20,27 | 20,30 | 20,29 | 60,73 |

# Drehstabfeder - rohrförmige Feder I

Belastbarkeit Rohrfeder:

gleiche Belastbarkeit für Drehstabfeder:

Steifigkeit der Drehstabfeder:

Steifigkeit Rohrfeder:

Steifigkeit Gesamtsystem:



Maximal speicherbare Arbeit Drehstabfeder:

Maximal speicherbare Arbeit Rohrfeder:

Maximal speicherbare Arbeit Gesamtsystem:

Wmaxges = WmaxD + WmaxR = 41,96 Nm + 54,53 Nm = 96,49Nm

|  |  | Drehstabfeder | Rohrfeder | Gesamtsystem |
| --- | --- | --- | --- | --- |
| Innendurchmesser | di [mm] | 0 | 12 | ------------- |
| Außendurchmesser | da [mm] | 10,8 | 14 | ------------- |
| Belastbarkeit | Mtmax [Nm] | 178,5 | 178,5 | 178,5 |
| Steifigkeit | ct [Nm] | 292,17 | 379,67 | 165.1 |
| maximal speicherbare Arbeit | Wmax [Nm] | 54,53 | 41,96 | 96,49 |

# Schraubenzugfeder II

aus der Zeichnung lassen sich die Berechnung maßgeblichen Daten ablesen:

d = 1 mm Dm = 10 mm







| Welche maximale Zugkraft kann in die Feder eingeleitet werden? | Fmax [N] = | 22,835 |
| --- | --- | --- |
| Wie groß ist die Steifigkeit  dieser Feder? | c [N/mm] = | 0,708 |
| Um welchen maximalen Federweg darf die Feder ausgelenkt werden? | fmax [mm] = | 32,2 |
| Wie groß ist die Arbeit, die maximal in dieser Feder gespeichert werden kann? | Wmax [Nm] = | 0,368 |
| Um welchen Federweg lenkt sich die Feder aus, wenn sie mit 15 N belastet wird? | f(15 N) [mm] = | 21,2 |
| Welche Kraft stellt sich ein, wenn die Feder um 25 mm ausgelenkt wird? | F(25 mm) [N] = | 17,7 |

# Schraubenzugfeder unter Volllast und Teillast II

aus der Zeichnung lassen sich die Berechnung maßgeblichen Daten ablesen:

d = 1 mm Dm = 18,34 mm i = 15,5

Aufgabenteil a:



Aufgabenteil b:



Aufgabenteil c:



Aufgabenteil d:





|  | Aufgabenteil a | Aufgabenteil b | Aufgabenteil c | Aufgabenteil d |
| --- | --- | --- | --- | --- |
|  | Volllast | Teillast mit | Teillast mit | Teillast mit |
| F [N] | 10,4 | **5** | 2,22 | 8,16 |
| f [mm] | 93,6 | 45,1 | **20** | 73,5 |
| W [Nmm] | 487,2 | 112,6 | 22,2 | **300** |

# Schraubenzugfeder unter Volllast und Teillast III

aus der Zeichnung lassen sich die Berechnung maßgeblichen Daten ablesen:

d = 1 mm Dm = 15 mm - 1 mm = 14 mm i = 15,5

Aufgabenteil a:



Aufgabenteil b:



Aufgabenteil c:



Aufgabenteil d:





|  | Aufgabenteil a | Aufgabenteil b | Aufgabenteil c | Aufgabenteil d |
| --- | --- | --- | --- | --- |
|  | Volllast | Teillast mit | Teillast mit | Teillast mit |
| F [N] | 14,36 | **10** | 4,996 | 12,24 |
| f [mm] | 57,5 | 40,0 | **20** | 49,0 |
| W [Nmm] | 412 | 200 | 49,96 | **300** |

# Abfederung Krankatze II

kinetische Energie der Krankatze beim Auftreffen auf die Feder:

Arbeit, die von einer einzelnen Feder aufgenommen werden muss:

WFeder = = 732,5 Nm



| Welche Arbeit muss die einzelne Feder beim Aufprall aufnehmen? | W | Nm | 732,5 |
| --- | --- | --- | --- |
| Berechnen Sie die Steifigkeit der oben beschriebenen Feder. | c | N/mm | 82,35 |
| Mit welcher Kraft wird die Feder während des Stoßes belastet? | Fmax | N | 10.984 |
| Wie hoch ist dann die Schubspannung in der Feder? | max | N/mm² | 451 |

# Schraubenzugfeder, Variation des Windungsdurchmessers

abgelesen: Anzahl der federnden Windungen iw = 24

| Dm | [mm] | 4 | 8 | 16 | 32 | 64 |
| --- | --- | --- | --- | --- | --- | --- |
| K | [-] | 1,969 | 1,383 | 1,172 | 1,082 | 1,040 |
| Fmax | [N] | 303,1 | 215,8 | 127,3 | 69,0 | 35,9 |
| c | [N/mm] | 110,7 | 13,8 | 1,72 | 0,216 | 0,0270 |
| Wmax | [Nm] | 0,415 | 1,68 | 4,69 | 11,01 | 23,8 |

Die erste Feder mit einem Windungsdurchmesser von 4 mm ist wenig sinnvoll: Sie ist viel zu steif und hat einen viel zu hohen K-Faktor.
