# Supplementary material
Source: publisher site journal article supplement (https://www.degruyterbrill.com/publication/isbn/9783110692143/downloadAsset/9783110692143_Zusatzmaterial_Basiswissen.zip)
Supplement: Supplementary file 7 [file Basiswissen, Zusatzaufgaben Kapitel 3, Aufgaben.doc]

Hochschule Trier, Fachbereich Technik

Prof. Dr.-Ing. Hubert Hinzen

Maschinenelemente Kapitel 3

Verbindungselemente und Verbindungstechniken

Aufgabensammlung B

Stand: 30.03.2020

Inhalt

[1 Befestigung einer Seilrollenlagerung 2](#__RefHeading___Toc36460052)

[2 Nietverbindung mit 8 Nieten I 3](#__RefHeading___Toc36460053)

[3 Nietverbindung mit 8 Nieten II 5](#__RefHeading___Toc36460054)

[4 Nietverbindung mit 12 Nieten II 7](#__RefHeading___Toc36460055)

# Befestigung einer Seilrollenlagerung

*Diese Aufgabe sollte vorzugsweise nach dem Vorlesungskapitel 3.1.4.3. behandelt werden.*

Die untenstehend skizzierte, doppelwandige Konsole dient zur Lagerung einer Seilrolle. Sie ist in der dargestellten Weise mit zwei gleichen, kaltgeschlagenen Nieten an einem Trägerblech befestigt. Mit dieser Vorrichtung werden Lasten von maximal 64 kg angehoben.


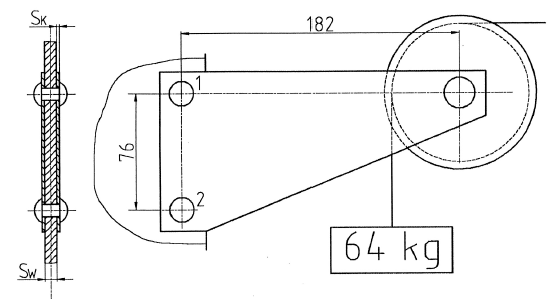


Die Nieten dürfen mit einer maximalen Schubspannung von zul = 90 N/mm² belastet werden. Die Konsolenbleche können bis pzul von 120 N/mm² belastet werden, der Wandträger hält einem Lochleibungsdruck von pzul 100 N/mm² stand.

a. Berechnen Sie die in den beiden Nieten zu übertragenden Kräfte! Differenzieren Sie dabei zunächst nach der querkraftbedingten Komponente Fq und nach der momentenbedingten Komponente Fm und und differenzieren Sie dabei jeweils nach x- und y-Komponente. Bestimmen Sie schließlich die resultierende Kraft FNiet!

|  |  | Niet 1 | Niet 2 |
| --- | --- | --- | --- |
|  | Fqx [N] |  |  |
|  | Fqy [N] |  |  |
|  | Fmx [N] |  |  |
|  | Fmy [N] |  |  |
|  | FNiet [N] |  |  |

b. Ermitteln Sie den erforderlichen Nietdurchmesser d (auf volle Millimeter aufrunden) und die für Konsole und Wandträger erforderlichen Blechstärken sK und sW!

|  |  | d [mm] | s [mm] |
| --- | --- | --- | --- |
|  | Wandträger |  |  |
|  | Konsole |  |  |

# Nietverbindung mit 8 Nieten I

*Diese Aufgabe sollte vorzugsweise nach dem Vorlesungskapitel 3.1.4.3. behandelt werden.*

Entsprechend untenstehender Skizze wird eine Konsolenkonstruktion mit insgesamt 8 gleichen Nieten (20 mm) an zwei U-Trägern befestigt. Die Konsole wird durch eine Kraft F = 48 kN zentrisch belastet.


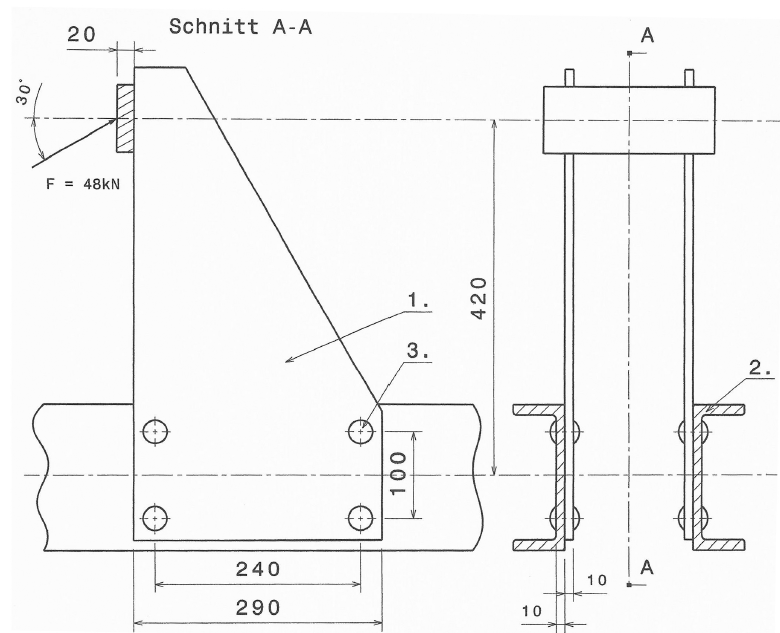


a. Ermitteln Sie die Kraft FNiet für alle Nieten! Orientieren Sie sich bei der Dokumentation Ihrer Ergebnisse an untenstehendem Schema. Berechnen Sie zweckmäßigerweise zunächst die Anteile Fq und Fm in ihren jeweiligen x- und y-Komponenten.

|  |  | oben links | oben rechts |
| --- | --- | --- | --- |
|  | Fqx [N]  Fqy [N]  Fmx [N]  Fmy [N] |  |  |
|  | **FNiet [N]** |  |  |
|  |  | unten links | unten rechts |
|  | Fqx [N]  Fqy [N]  Fmx [N]  Fmy [N] |  |  |
|  | **FNiet [N]** |  |  |

1. Ermitteln für den am höchsten belasteten Niet den Querkraftschub und den Lochleibungsdruck!

|  |  [N/mm²] |  |
| --- | --- | --- |
|  | pL [N/mm²] |  |

# Nietverbindung mit 8 Nieten II

*Diese Aufgabe sollte vorzugsweise nach dem Vorlesungskapitel 3.1.4.3. behandelt werden.*

Entsprechend der untenstehender Darstellung wird eine Konsolenkonstruktion mit insgesamt 8 gleichen Nieten an zwei Trägern befestigt. Die Konsole wird durch eine Kraft F zentrisch belastet.


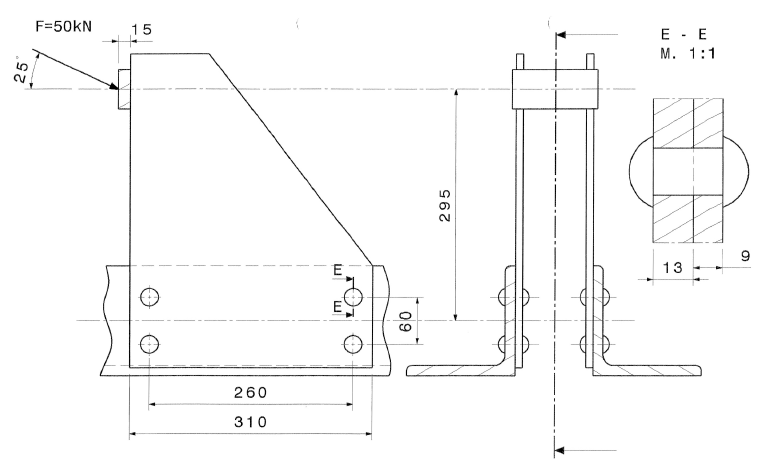


a. Ermitteln Sie die Kraft FNiet für alle Nieten! Orientieren Sie sich bei der Dokumentation Ihrer Ergebnisse an untenstehendem Schema. Berechnen Sie zweckmäßigerweise zunächst die Anteile Fq und Fm in ihren jeweiligen x- und y-Komponenten.

|  |  | oben links | oben rechts |
| --- | --- | --- | --- |
|  | Fqx [N]  Fqy [N]  Fmx [N]  Fmy [N] |  |  |
|  | **FNiet [N]** |  |  |
|  |  | unten links | unten rechts |
|  | Fqx [N]  Fqy [N]  Fmx [N]  Fmy [N] |  |  |
|  | **FNiet [N]** |  |  |

1. Die Nieten weisen einen Durchmesser von 15 mm auf. Ermitteln für den am höchsten belasteten Niet den Querkraftschub und den Lochleibungsdruck!

|  |  [N/mm²] |  |
| --- | --- | --- |
|  | pL [N/mm²] |  |

# Nietverbindung mit 12 Nieten II

*Diese Aufgabe sollte vorzugsweise nach dem Vorlesungskapitel 3.1.4.3. behandelt werden.*

Eine aus zwei Blechen bestehende Konsolenkonstruktion wird mit insgesamt 12 gleichen Nieten an zwei T-Trägern befestigt. Die Konsole wird durch eine Kraft F = 60 kN mittig belastet.


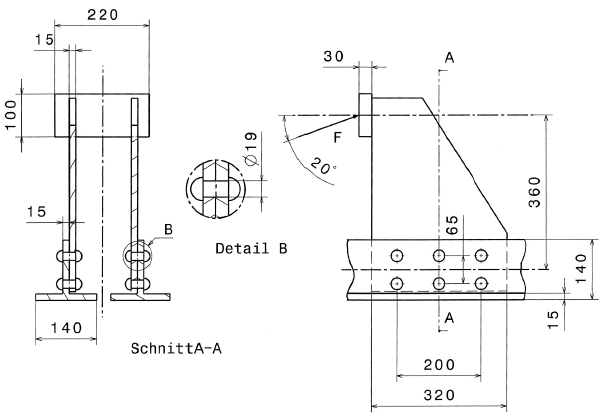


a. Ermitteln Sie die Kraft Fges für alle Nieten! Orientieren Sie sich bei der Dokumentation Ihrer Ergebnisse an untenstehendem Schema. Berechnen Sie zweckmäßigerweise zunächst die Anteile Fq und Fm. Zur Ermittlung der Gesamtkraft FNiet ist es zweckmäßig, die zuvor berechneten Werte in x- und y-Komponente zu zerlegen.

|  |  | Niet 1: | Niet 2: | Niet 3: |
| --- | --- | --- | --- | --- |
|  | Fqx [N]  Fqy [N]  Fmx [N]  Fmy [N] |  |  |  |
|  | **FNiet [N]** |  |  |  |
|  |  | Niet 4: | Niet 5: | Niet 6: |
|  | Fqx [N]  Fqy [N]  Fmx [N]  Fmy [N] |  |  |  |
|  | **FNiet [N]** |  |  |  |

1. Ermitteln für den am höchsten belasteten Niet den Querkraftschub und den Lochleibungsdruck!

|  |  [N/mm²] |  |
| --- | --- | --- |
|  | pL [N/mm²] |  |
