# Supplementary material
Source: publisher site journal article supplement (https://www.degruyterbrill.com/publication/isbn/9783110692143/downloadAsset/9783110692143_Zusatzmaterial_Basiswissen.zip)
Supplement: Supplementary file 8 [file Basiswissen, Zusatzaufgaben Kapitel 3, Lösungen.doc]

Hochschule Trier, Fachbereich Technik

Prof. Dr.-Ing. Hubert Hinzen

Maschinenelemente Kapitel 3:

Verbindungselemente und Verbindungstechniken

Aufgabensammlung B

Lösungen

Stand: 30.03.2020

Inhalt

[1 Befestigung einer Seilrollenlagerung 2](#__RefHeading___Toc36460277)

[2 Nietverbindung mit 8 Nieten I 3](#__RefHeading___Toc36460278)

[3 Nietverbindung mit 8 Nieten II 4](#__RefHeading___Toc36460279)

[4 Nietverbindung mit 12 Nieten II 5](#__RefHeading___Toc36460280)

# Befestigung einer Seilrollenlagerung

1. Die Gewichtskraft G = m * g = 628 N wirkt sowohl nach unten (y-Richtung) als auch nach rechts (x-Richtung) und teilt sich dabei zu gleichen Anteilen auf die beiden Nieten auf:

Um den Schwerpunkt der Nietverbindung, der genau zwischen den beiden Nieten liegt, wird ein Moment eingeleitet:

eingeleitet:

Dieses Moment wird auf die beiden Nieten abgestützt, wobei nur Reaktionkräfte in x-Richtung entstehen:

abgestützt 

Zur Berechnung der Gesamtkraft FNiet werden alle Anteile unter Berücksichtigung ihres Vorzeichen komponentenweise addiert und zu einer Resultierenden zusammengesetzt:

Niet 1:

Niet 2:

|  |  | Niet 1 | Niet 2 |
| --- | --- | --- | --- |
|  | Fqx [N] | 314 | 314 |
|  | Fqy [N] | -314 | -314 |
|  | Fmx [N] | 1.817 | -1.817 |
|  | Fmy [N] | 0 | 0 |
|  | FNiet [N] | 2.154 | 1.536 |

b. zweischnittige Nietverbindung:





Wand:

Konsole:

|  |  | d [mm] | s [mm] |
| --- | --- | --- | --- |
|  | Wandträger | 4 | 5,4 |
|  | Konsole | 4 | 2,3 |

# Nietverbindung mit 8 Nieten I

Fgesx = 48 kN * cos 30° = 41,57 kN Fgesy = 48 kN * sin 30° = 24,00 kN

Querkraftbedingte Belastung für jeden einzelnen Niet:

im Betrag und in der Richtung für alle Nieten gleich

Moment eingeleitet:

Momentenbedingte Belastung für den einzelnen Niet:

mit

den Winkel , der für die Zerlegung von Fm in x- und y-Komponente erforderlich ist, gewinnt man aus der Geometrie der Nietanordnung:

Fmx = Fm * cos 67,3° = 7.947 N Fmy = Fm * sin 67,3° = 18.999 N

im Betrag für alle Nieten gleich, aber unterschiedlich im Vorzeichen (s. untenstehendes Schema)

|  |  | oben links | oben rechts |
| --- | --- | --- | --- |
|  | Fqx [N]  Fqy [N]  Fmx [N]  Fmy [N] | 5.196  3.000  7.947  18.999 | 5.196  3.000  7.947  -18.999 |
|  | **FNiet [N]** | 25.626 | 20.705 |
|  |  | unten links | unten rechts |
|  | Fqx [N]  Fqy [N]  Fmx [N]  Fmy [N] | 5.196  3.000  -7.947  18.999 | 5.196  3.000  -7.947  -18.999 |
|  | **FNiet [N]** | 22.170 | 16.233 |

|  |  [N/mm²] | 81 |
| --- | --- | --- |
|  | pL [N/mm²] | 128 |

# Nietverbindung mit 8 Nieten II

Fgesx = 50 kN * cos 25° = 45.315 N Fgesy = 50 kN * sin 25° = 21.131 N

Moment eingeleitet:

Querkraftbedingte Belastung für den einzelnen Niet:

im Betrag und in der Richtung für alle Nieten gleich

Momentenbedingte Belastung für den einzelnen Niet:

mit

den Winkel , der für die Zerlegung von Fm in x- und y-Komponente erforderlich ist, gewinnt man aus der Geometrie der Nietanordnung:

Fmx = Fm * cos 77,0° = 2.061 N Fmy = Fm * sin 77,0° = 8.925 N

im Betrag für alle Nieten gleich, aber unterschiedlich im Vorzeichen (s. untenstehendes Schema)

|  |  | oben links | oben rechts |
| --- | --- | --- | --- |
|  | Fqx [N]  Fqy [N]  Fmx [N]  Fmy [N] | 5.660  -2.640  2.061  8.925 | 5.660  -2.640  2.061  -8.925 |
|  | **FNiet [N]** | 9.956 | 13.906 |
|  |  | unten links | unten rechts |
|  | Fqx [N]  Fqy [N]  Fmx [N]  Fmy [N] | 5.660  -2.640  -2.061  8.925 | 5.660  -2.640  -2.061  -8.925 |
|  | **FNiet [N]** | 7.243 | 12.112 |

|  |  [N/mm²] | 79 |
| --- | --- | --- |
|  | pL [N/mm²] | 103 |

# Nietverbindung mit 12 Nieten II

Fgesx = 60 kN * cos 20° = 56,38 kN Fgesy = 60 kN * sin 20° = 20,52 kN

Moment eingeleitet:

Querkraftbedingte Belastung für den einzelnen Niet:

im Betrag und in der Richtung für alle Nieten gleich

Abstände der einzelnen Nieten zum Schwerpunkt der Nietverbindung:

Abstützung des Momentes, momentenbedingte Belastung für den einzelnen Niet:

für Niet 1, 3, 4 und 6:

für Niet 2 und 5:

den Winkel , der für die Zerlegung von Fm in x- und y-Komponente erforderlich ist, gewinnt man aus der Geometrie der Nietanordnung:

für Niet 1, 3, 4 und 6:

Fmx1346 = Fm1346 * cos  = 27453 N * cos 72,00° = 8.483 N

Fmy1346 = Fm1346 * sin  = 27453 N * cos 72,00° = 26.109 N

für Niet 2 und 5:

Fmx25 = Fm25 = 8.483 N

Fmy25 = 0

|  |  | Niet 1: | Niet 2: | Niet 3: |
| --- | --- | --- | --- | --- |
|  | Fqx [N]  Fqy [N]  Fmx [N]  Fmy [N] | 4.698  1.710  8.483  26.109 | 4.698  1.710  8.483  0 | 4.698  1.710  8.483  -26.109 |
|  | **FNiet [N]** | 30.784 | 13.294 | 27.732 |

|  |  | Niet 4: | Niet 5: | Niet 6: |
| --- | --- | --- | --- | --- |
|  | Fqx [N]  Fqy [N]  Fmx [N]  Fmy [N] | 4.698  1.710  -8.483  26.109 | 4.698  1.710  -8.483  0 | 4.698  1.710  -8.483  -26.109 |
|  | **FNiet [N]** | 28.075 | 4.155 | 24.691 |

|  |  [N/mm²] | 109 |
| --- | --- | --- |
|  | pL [N/mm²] | 108 |
