# Supplementary material
Source: publisher site journal article supplement (https://www.degruyterbrill.com/publication/isbn/9783110692143/downloadAsset/9783110692143_Zusatzmaterial_Basiswissen.zip)
Supplement: Supplementary file 9 [file Basiswissen, Zusatzaufgaben Kapitel 4, Aufgaben.doc]

Hochschule Trier, Fachbereich Technik

Prof. Dr.-Ing. Hubert Hinzen

Maschinenelemente Kapitel 4

Schrauben

Aufgabensammlung B

Stand: 30.03.2020

Inhalt

[1 Winkelgesteuertes Anziehen II 2](#__RefHeading___Toc36461304)

[2 Schnellspannnabe Fahrrad 3](#__RefHeading___Toc36461305)

[3 Rohrleitungsflansch II 5](#__RefHeading___Toc36461306)

[4 Druckbehälter statisch belastet II 7](#__RefHeading___Toc36461307)

[5 Rohrleitungsflansch III 9](#__RefHeading___Toc36461308)

[6 Rohrleitungsflansch IV 11](#__RefHeading___Toc36461309)

[7 Druckbehälter statisch und dynamisch belastet III 13](#__RefHeading___Toc36461310)

[8 Ausschlagspannung Schrauben 15](#__RefHeading___Toc36461311)

[9 Druckbehälter dynamisch belastet II 16](#__RefHeading___Toc36461312)

[10 Druckbehälter dynamisch belastet III 17](#__RefHeading___Toc36461313)

# Winkelgesteuertes Anziehen II

Es ist eine Stahlschraube M10 mit der freien Klemmlänge L = 65 mm gegeben. Die Steifigkeit der Zwischenlage ist doppelt so groß wie die der Schraube. Der Reibwert im Gewinde beträgt µGew = 0,12. Es kann weiterhin angenommen werden, dass das Kopfreibungsmoment genau so groß ist wie das Gewindemoment beim Anziehen. Das Gewinde erstreckt sich bis zum Kopf der Schraube. Zur Bearbeitung dieser Aufgabe ist die Skizzierung des Verspannungsschaubildes hilfreich.

Die Schraube wird mit einem Gesamtmoment von 32 Nm angezogen.

| Berechnen Sie die Steifigkeit der Schraube! | cS | N/µm |  |
| --- | --- | --- | --- |
| Berechnen Sie die Steifigkeit der Zwischenlage! | cZ | N/µm |  |
| Wie groß ist die Vorspannkraft? | FV | N |  |
| Um welchen Betrag wird die Schraube gelängt? | fS | µm |  |
| Um welchen Betrag wird die Zwischenlage gestaucht? | fZ | µm |  |
| Um welchen Winkel muss die Schraube beim Festziehen zwischen der ersten festen Berührung der Kontaktflächen und dem endgültigen Montagezustand verdreht werden? |  | ° |  |
| Welches Gesamtmoment muss aufgewendet werden, um die Schraubverbindung zu lösen? | Mgeslös | Nm |  |

# Schnellspannnabe Fahrrad

*Diese Aufgabe sollte vorzugsweise nach dem Vorlesungskapitel 4.4.1. behandelt werden.*

Das folgende Bild zeigt die Schnellspannnabe für das Vorderrad eines Fahrrades.


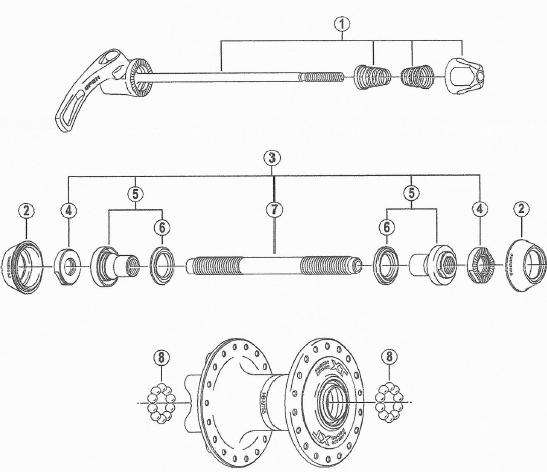


Das Vorderrad wird in die Fahrradgabel eingeführt und mit dem im oberen Detailbild links dargestellten Hebel an den Ausfallenden der Gabel verklemmt. Zuvor muß jedoch mit der im oberen Bilddrittel rechts dargestellten handbetätigten Mutter die richtige Vorspannung eingestellt werden. Dazu geht man zweckmäßigerweise folgendermaßen vor: Zunächst wird bei gelöster Einstellmutter der Schließhebel geschlossen. Dann wird die Einstellmutter momentenlos bis zum Anschlag gedreht. Dann wird der Schließhebel wieder geöffnet und die Einstellmutter um einen Voreinstellwinkel  verdreht, bevor der Schließhebel dann endgültig geschlossen wird.

Ziel dieser Aufgabe ist es, diesen Voreinstellwinkel  zu berechnen. Zur Bestimmung der Steifigkeiten werden die in folgender Skizze dokumentierten vereinfachenden Annahmen getroffen:


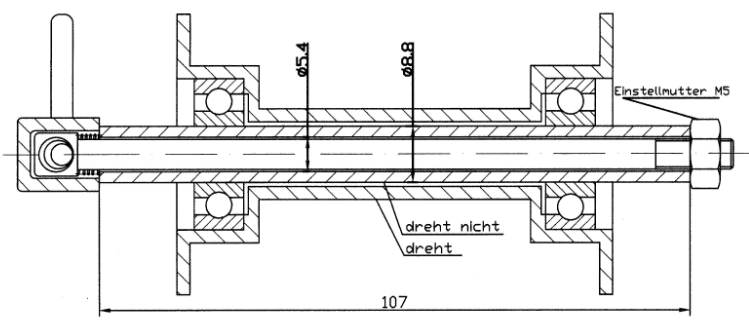


Der Zuganker („Schraube“) besteht aus einem zylindrischen Stab mit 5 mm Durchmesser und 107 mm Länge. Die Achse mit den weiteren verklemmten Bauteilen einschließlich der Ausfallenden („Zwischenlage“) besteht ersatzweise aus einem rohrförmigen Körper mit einem Innendurchmesser von 5,4 mm und einem Außendurchmesser von 8,8 mm.

1. Berechnen Sie den Voreinstellwinkel Stahl für einen Stahlwerkstoff, der mit einer Zugspannung von 500 N/mm² belastet werden soll.
2. Berechnen Sie den Voreinstellwinkel Titan für einen Titanwerkstoff, der mit einer Zugspannung von 350 N/mm² belastet werden soll.

Zur Dokumentierung der (Zwischen-) ergebnisse benutzen Sie bitte das folgende Schema:

|  | Z [N/mm²] | E [N/mm²] | cS [N/µm] | cZ [N/µm] | FV [N] |  [°] |
| --- | --- | --- | --- | --- | --- | --- |
| Stahl | 500 | 2,10*105 |  |  |  |  |
| Titan | 350 | 1,15*105 |  |  |  |  |

# Rohrleitungsflansch II

*Diese Aufgabe sollte vorzugsweise nach dem Vorlesungskapitel 4.5.2.1. behandelt werden.*

Die einzelnen Rohre einer Rohrleitung werden mit den nachfolgend dargestellten Flanschverbindungen untereinander verbunden.


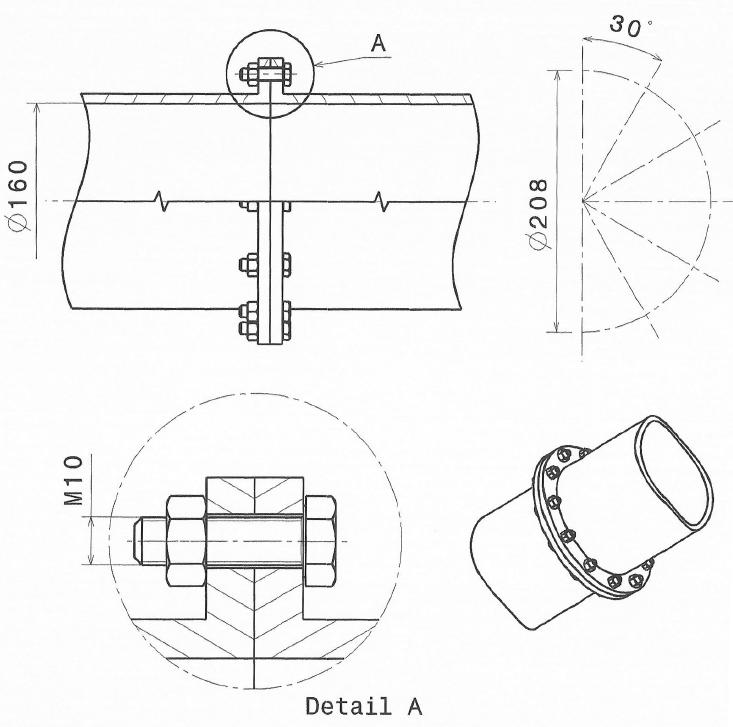


Die Rohrleitung steht unter einem statischen Druck von 80 bar. Die Steifigkeit der Zwischenlage ist doppelt so groß wie die Schraubensteifigkeit. Die Restdichtkraft FRK soll aus Sicherheitsgründen das 1,3-fache der Betriebskraft FBL betragen. Im Gewinde liegt ein Reibwert von µGew = 0,18 vor. Es kann weiterhin angenommen werden, dass das Anzugsmoment das 1,6-fache des Gewindemomentes beträgt.

| Berechnen Sie zunächst die an der einzelnen Schraube wirkende Betriebskraft, die Restklemmkraft, die maximale Schraubenkraft und die Vorspannkraft. | | FBL  FRK  FSmax  FV | N  N  N  N |  |
| --- | --- | --- | --- | --- |
| Wie groß ist das Gewindemoment, das Kopfreibungsmoment und das Anzugsmoment? | | MGew  MKR  Manz | Nm  Nm  Nm |  |
| Wie groß ist die Zugspannung in der Schraube? | | Z | N/mm² |  |
| Welche Schubspannung wird in der Schraube hervorgerufen? | | t | N/mm² |  |
| Mit welcher Vergleichsspannung wird die Schraube belastet? | | V | N/mm² |  |
| Welche Schraubengüte ist erforderlich? Markieren Sie die Schraubengüte durch Ankreuzen. | 3.6 4.6 4.8 5.6 5.8  6.8 8.8 9.8 10.9 12.9 | | | |
| Auf welchen Betrag kann der Innendruck der Rohrleitung unter ansonsten gleichen Bedingungen gesteigert werden, wenn Schrauben der Festigkeitsklasse 12.9 verwendet werden? | | p12.9 | bar |  |

# Druckbehälter statisch belastet II

*Diese Aufgabe sollte vorzugsweise nach dem Vorlesungskapitel 4.5.2.1. behandelt werden.*

Ein Behälter steht unter einem statischen Überdruck von 12 bar. Das kreisrunde Einstiegsloch wird mit einer Platte verschlossen, die mit insgesamt 24 Schrauben M12 befestigt wird. Die Schraubensteifigkeit sei genau halb so groß wie die Steifigkeit der Zwischenlage. Die Restdichtkraft muss aus Sicherheitsgründen doppelt so hoch sein wie die Betriebskraft. Der Reibwert im Gewinde kann zu  = 0,15 angenommen werden. Der wirksame Radius der Kopfauflage beträgt rK = 6 mm und der Reibwert an der Kopfauflage ist zu µ = 0,15 zu setzen.


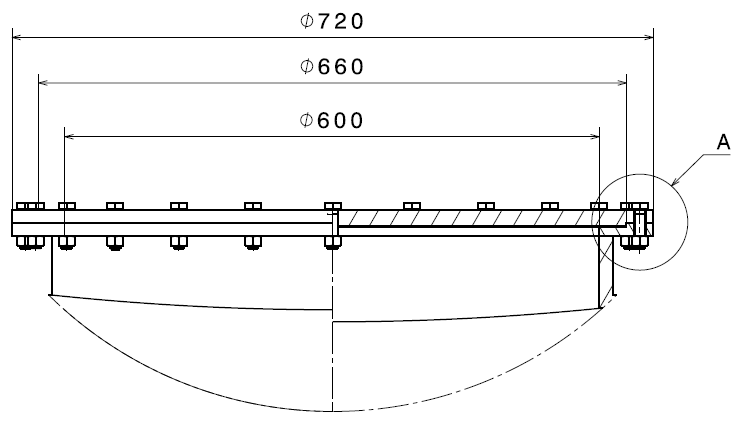


| Wie groß ist die Betriebskraft auf jede einzelne Schraube? | | FBL | N |  |
| --- | --- | --- | --- | --- |
| Welche Restdichtkraft wird an der Trennfuge wirksam? | | FRK | N |  |
| Mit welcher Kraft wird die maximal belastet? | | FSmax | N |  |
| Mit welcher Kraft müssen die Schrauben vorgespannt werden? | | FV | N |  |
| Wie groß ist das Gewindemoment beim Anziehen der Schraube? | | MGewanz | Nm |  |
| Welches Moment ist zum Lösen des Gewindes erforderlich? | | MGewlös | Nm |  |
| Mit welchem Gesamtmoment müssen die Schrauben angezogen werden? | | Mgesanz | Nm |  |
| Welches Gesamtmoment ist erforderlich, um die Schrauben zu lösen? | | Mgeslös | Nm |  |
| Wie groß ist die Zugspannung in der Schraube? | | Z | N/mm² |  |
| Welche Schubspannung wird in der Schraube hervorgerufen? | | t | N/mm² |  |
| Mit welcher Vergleichsspannung wird die Schraube belastet? | | V | N/mm² |  |
| Welche Schraubengüte ist erforderlich? Markieren Sie die Schraubengüte durch Ankreuzen. | 3.6 4.6 4.8 5.6 5.8  6.8 8.8 9.8 10.9 12.9 | | | |
| Auf welchen Wert könnte der Kesseldruck gesteigert werden, wenn unter ansonsten gleichbleibenden Bedingungen die Schraubengüte 12.9 verwendet würde? | | p12.9 | bar |  |

# Rohrleitungsflansch III

*Diese Aufgabe sollte vorzugsweise nach dem Vorlesungskapitel 4.5.2.1. behandelt werden.*

Die einzelnen Rohre einer Rohrleitung werden mit den nachfolgend dargestellten Flanschverbindungen untereinander verbunden.


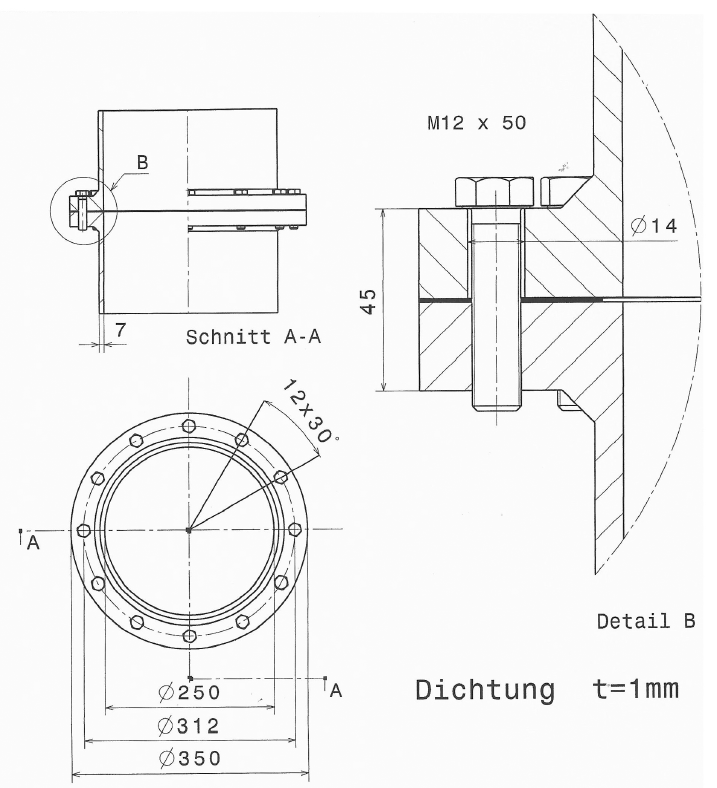


Die Rohrleitung steht unter einem statischen Druck von 50 bar. Die Steifigkeit der Zwischenlage ist doppelt so groß wie die Schraubensteifigkeit. Die Restdichtkraft FRK soll aus Sicherheitsgründen das 1,8-fache der Betriebskraft FBL betragen. Im Gewinde liegt ein Reibwert von µGew = 0,15 vor. Es kann weiterhin angenommen werden, dass das Anzugsmoment das 1,8-fache des Gewindemomentes beträgt.

| Berechnen Sie zunächst die an der einzelnen Schraube wirkende Betriebskraft, die Restklemmkraft, die maximale Schraubenkraft und die Vorspannkraft. | | FBL  FRK  FSmax  FV | kN  kN  kN  kN | 20,45  36,82  57,27  50,45 |
| --- | --- | --- | --- | --- |
| Wie groß ist das Gewindemoment, das Kopfreibungsmoment und das Anzugsmoment? | | MGew  MKR  Manz | Nm  Nm  Nm | 62,09  49,67  111,76 |
| Wie groß ist die Zugspannung in der Schraube?  Welche Schubspannung wird in der Schraube hervorgerufen?  Mit welcher Vergleichsspannung wird die Schraube belastet? | | Z  t  V | N/mm²  N/mm²  N/mm² | 679  285  839 |
| Welche Schraubengüte ist erforderlich? Markieren Sie die Schraubengüte durch Ankreuzen. | 3.6 4.6 4.8 5.6 5.8  6.8 8.8 9.8 **10.9** 12.9 | | | |
| Auf welchen Betrag kann der Innendruck der Rohrleitung unter ansonsten gleichen Bedingungen gesteigert werden, wenn Schrauben der Festigkeitsklasse 12.9 verwendet werden? | | p12.9 | bar | 64,3 |

# Rohrleitungsflansch IV

Die einzelnen Rohre einer Rohrleitung werden mit den nachfolgend dargestellten Flanschverbindungen untereinander verbunden.


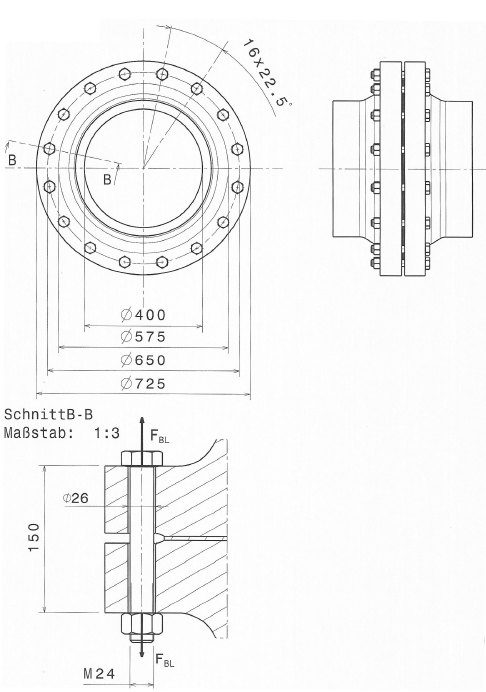


Die Rohrleitung steht unter einem statischen Druck von 20 bar. Die Steifigkeit der Zwischenlage ist doppelt so groß wie die Schraubensteifigkeit. Die Restdichtkraft FRK soll aus Sicherheitsgründen das 1,5-fache der Betriebskraft FBL betragen. Im Gewinde liegt ein Reibwert von µGew = 0,12 vor. Es kann weiterhin angenommen werden, dass das Kopfreibungsmoment das 0,8-fache des Gewindemomentes beträgt.

|  | Berechnen Sie zunächst die an der einzelnen Schraube wirkende Betriebskraft, die Restklemmkraft sowie die maximale Schraubenkraft! | FBL  FRK  FSmax | | N  N  N |  |
| --- | --- | --- | --- | --- | --- |
|  | Mit welcher Kraft muss die Schraube vorgespannt werden? | FV | | N |  |
|  | Wie groß ist das Gewindemoment, das Kopfreibungsmoment und das Anzugsmoment? | MGew  MKR  Manz | | Nm  Nm  Nm |  |
| Kennzeichnen Sie durch Ankreuzen die Schraubengüte, die erforderlich ist, um die Festigkeit der Verbindung sicherzustellen? | | | 3.6 - 4.6 - 4.8 - 5.6 - 5.8  6.8 - 8.8 - 10.9 – 12.9 | | |
|  | Auf welchen Betrag kann der Innendruck der Rohrleitung unter ansonsten gleichen Bedingungen gesteigert werden, wenn Belastbarkeit der Schrauben vollständig ausgenutzt wird? | pmax | | bar |  |

# Druckbehälter statisch und dynamisch belastet III

Der unten skizzierte Druckbehälter wird mit einer Platte verschlossen, die mit 16 Schrauben fixiert wird. Die Verschraubung kann in drei verschiedenen Versionen ausgeführt werden. Sämtliche Bauteile werden in Stahl ausgeführt.


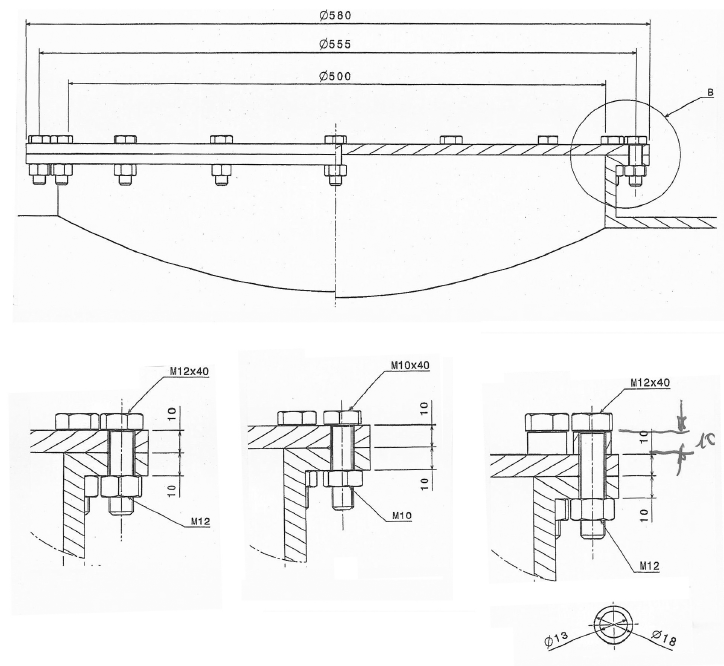


Es kann vereinfachend angenommen werden, dass die Steifigkeit der Zwischenlage in allen drei Fällen cZ = 1.900 N/µm beträgt. Die Restklemmkraft soll 40 % der maximalen Betriebskraft betragen.

|  |  | Variante A  statischer Druck  26 bar | Variante A  dynamischer  Druck zwischen  0 und 26 bar pulsierend | Variante B  dynamischer  Druck zwischen  0 und 26 bar pulsierend | Variante C  dynamischer  Druck zwischen  0 und 26 bar pulsierend |
| --- | --- | --- | --- | --- | --- |
| cZ | N/µm | 1.900 | 1.900 | 1.900 | 1.900 |
| cS bzw. cSH | N/µm |  |  |  |  |
| FBL | N |  |  |  |  |
| FRK | N |  |  |  |  |
| FV | N |  |  |  |  |
| FSmax | N |  |  |  |  |
| FSmin | N |  |  |  |  |
| FSstat | N |  |  |  |  |
| FSdyn | N |  |  |  |  |
| Zstat | N/mm² |  |  |  |  |
| Zdyn | N/mm² |  |  |  |  |

# Ausschlagspannung Schrauben

*Diese Aufgabe sollte vorzugsweise nach dem Vorlesungskapitel 4.5.2.2. behandelt werden.*

Es sind drei Stahlschrauben M8, M10 und M12 gegeben. Das Maß DA (vgl. Bild 4.42) zur Ermittlung der Ersatzfläche für die Berechnung der Zwischenlagensteifigkeit beträgt 34 mm. Das Gewinde erstreckt sich annähernd bis zum Kopf der Schraube.

Die Schraube ist so weit vorgespannt, daß immer noch eine Restklemmkraft vorhanden ist. Die so vorgespannte Schraubverbindung wird am Schraubenkopf mit einer Betriebskraft FBL = 20 kN schwellend belastet.

1. Berechnen Sie die Steifigkeit der Schraube cS und der Zwischenlage cZ sowie das Verspannungsverhältnis .
2. Wie groß ist die durch die Betriebskraft bedingte Laständerung der Schraube FBS und der Zwischenlage FBZ?
3. Welche Verformung fB tritt aufgrund der Betriebskraft ein?
4. Welche Ausschlagsspannung A wird durch die schwellend aufgebrachte Betriebskraft verursacht?

|  |  | 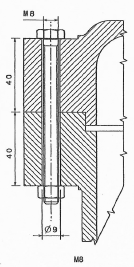 | 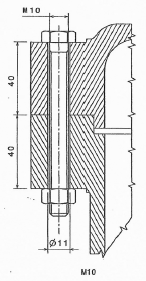 | 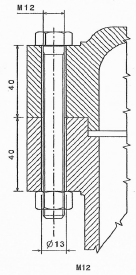 |
| --- | --- | --- | --- | --- |
| cS | [N/µm] |  |  |  |
| cZ | [N/µm] |  |  |  |
|  |  |  |  |  |
| FBS | [N] |  |  |  |
| FBZ | [N] |  |  |  |
| fB | [µm] |  |  |  |
| A | [N/mm²] |  |  |  |

# Druckbehälter dynamisch belastet II

Ein Druckbehälter wird mit einem Deckel verschlossen, dessen Innendurchmesser d = 500 mm beträgt. Der Behälter steht unter einem dynamisch pulsierenden Überdruck zwischen pu = 5 bar und po = 8 bar. Er ist mit 20 Schrauben M10 befestigt. Die Steifigkeit der Zwischenlage ist 1,5-fach so groß wie die der Schraube. Die Schraubverbindung soll so vorgespannt werden, dass die Restdichtkraft so groß ist wie die maximale Betriebskraft. Der Reibwert kann einheitlich mit µ = 0,12 angenommen werden.


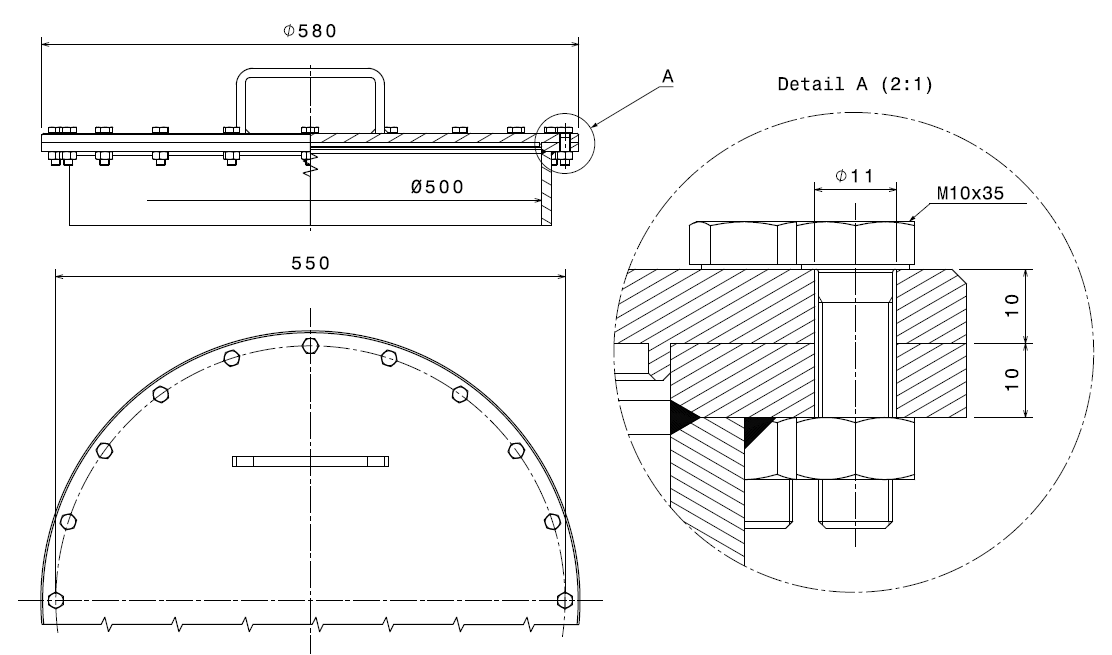


| Wie groß ist die auf die einzelne Schraube wirkende maximale Betriebskraft, die minimale Betriebskraft und die Restklemmkraft? | FBLmax  FBLmin  FRK | N  N  N |  |
| --- | --- | --- | --- |
| Wie groß ist die Vorspannkraft? | FV | N |  |
| Wie groß ist die maximale und die minimale Kraft auf die Schraube während des pulsierenden Druckbetriebes? | FSmax  FSmin | N  N |  |
| Wie groß ist die statische und die dynamische Vergleichsspannung in der Schraube? | Vstat  Vdyn | N/mm²  N/mm² |  |

# Druckbehälter dynamisch belastet III

*Diese Aufgabe sollte vorzugsweise nach dem Vorlesungskapitel 4.5.2.2. behandelt werden.*

Der unten dargestellte Druckbehälter steht unter einem dynamisch pulsierenden Überdruck zwischen pu = 5 bar und po = 8 bar. Der Deckel ist mit 24 Schrauben M12 befestigt. Die Steifigkeit der Zwischenlage ist 1,5-fach so groß wie die der Schraube. Die Schraubverbindung soll so vorgespannt werden, dass die Restdichtkraft doppelt so groß ist wie die maximale Betriebskraft. Der Reibwert kann einheitlich mit µ = 0,12 angenommen werden.


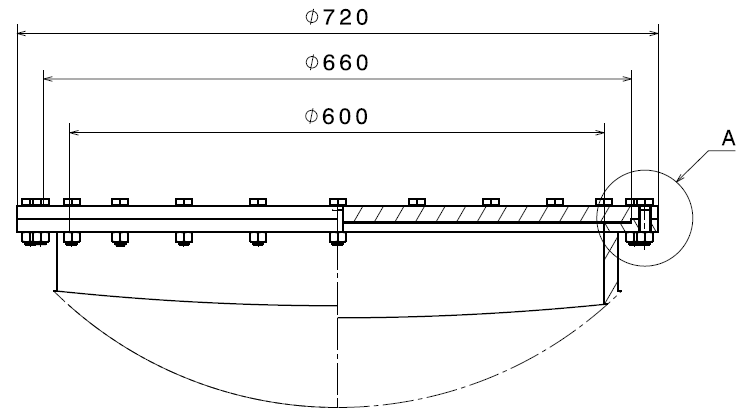


1. Wie groß ist die auf die einzelne Schraube wirkende maximale Betriebskraft FBmax und die minimale Betriebskraft FBmin?
2. Wie groß ist und die Restklemmkraft FRK und die Vorspannkraft FV?
3. Wie groß ist die maximale Kraft auf die Schraube FSmax und die minimale Kraft auf die Schraube FSmin?
4. Wie groß ist die statische Kraft FSstat und die dynamische Kraft FSdyn, die die einzelne Schraube belastet?
5. Wie groß ist die statische Vergleichsspannung Vstat und die dynamische Vergleichsspannung Vdyn in der Schraube?

| a | FBLmax | N |  | FBLmin | N |  |
| --- | --- | --- | --- | --- | --- | --- |
| b | FRK | N |  | FV | N |  |
| c | FSmax | N |  | FSmin | N |  |
| d | FSstat | N |  | FSdyn | N |  |
| e | Vstat | N/mm² |  | Vdyn | N/mm² |  |
