# Supplementary material
Source: publisher site journal article supplement (https://www.degruyterbrill.com/publication/isbn/9783110692143/downloadAsset/9783110692143_Zusatzmaterial_Basiswissen.zip)
Supplement: Supplementary file 10 [file Basiswissen, Zusatzaufgaben Kapitel 4, Lösungen.doc]

Hochschule Trier, Fachbereich Technik

Prof. Dr.-Ing. Hubert Hinzen

Maschinenelemente Kapitel 4

Schrauben

Aufgabensammlung B

Lösungen

Stand: 30.03.2020

Inhalt

[1 Winkelgesteuertes Anziehen II 2](#__RefHeading___Toc36462026)

[2 Schnellspannnabe Fahrrad 3](#__RefHeading___Toc36462027)

[3 Rohrleitungsflansch II 4](#__RefHeading___Toc36462028)

[4 Druckbehälter statisch belastet II 6](#__RefHeading___Toc36462029)

[5 Rohrleitungsflansch III 8](#__RefHeading___Toc36462030)

[6 Rohrleitungsflansch IV 10](#__RefHeading___Toc36462031)

[7 Druckbehälter statisch und dynamisch belastet III 11](#__RefHeading___Toc36462032)

[8 Ausschlagspannung Schrauben 13](#__RefHeading___Toc36462033)

[9 Druckbehälter dynamisch belastet II 15](#__RefHeading___Toc36462034)

[10 Druckbehälter dynamisch belastet III 16](#__RefHeading___Toc36462035)

# Winkelgesteuertes Anziehen II

Gl. 4.31

Gl. 4.15/16

Faktor 2, weil Man = MGew + MKR und MGew = MKR

Gl. 4.11





Gl. 4.4

= - 23,1Nm

| Berechnen Sie die Steifigkeit der Schraube! | cS | N/µm | 187,4 |
| --- | --- | --- | --- |
| Berechnen Sie die Steifigkeit der Zwischenlage! | cZ | N/µm | 374,8 |
| Wie groß ist die Vorspannkraft? | FV | N | 18.379 |
| Um welchen Betrag wird die Schraube gelängt? | fS | µm | 98,1 |
| Um welchen Betrag wird die Zwischenlage gestaucht? | fZ | µm | 49,1 |
| Um welchen Winkel muss die Schraube beim Festziehen zwischen der ersten festen Berührung der Kontaktflächen und dem endgültigen Montagezustand verdreht werden? |  | ° | 35,3 |
| Welches Gesamtmoment muss aufgewendet werden, um die Schraubverbindung zu lösen? | Mgeslös | Nm | 23 |

# Schnellspannnabe Fahrrad

Der Wert für die Titanschraube errechnet sich auf ähnliche Weise. Wegen der Linearität der Zusammenhänge kann die Berechnung aber auch „per Dreisatz“ erfolgen:

|  | Z [N/mm²] | E [N/mm²] | cS [N/µm] | cZ [N/µm] | FV [N] |  [°] |
| --- | --- | --- | --- | --- | --- | --- |
| Stahl | 500 | 2,10*105 | 38,5 | 74,4 | 7100 | 126 |
| Titan | 350 | 1,15*105 | 21,1 | 40,7 | 4970 | 161 |

# Rohrleitungsflansch II

Kräfte für die gesamte Schraubverbindung:

Kraft für die einzelne Schraube:

FRK = 1,3 * FBL = 17,42kN

FSmax = FRK + FBL = 13,40 kN + 17,42 kN = 30,82 kN

mit Gl. 4.55

Gl. 4.12

Gl. 4.11

MKR = 0,6 MGew = 0,6 * 31,36 Nm = 18,81 Nm

Manz = MGew + MKR = 31,36 Nm + 18,81 Nm = 50,17 Nm

V =

Schraubengüte 10.9 mit zul = 900 N/mm²

Schraubengüte 12.9 mit zul = 1.080 N/mm²



| Berechnen Sie zunächst die an der einzelnen Schraube wirkende Betriebskraft, die Restklemmkraft, die maximale Schraubenkraft und die Vorspannkraft. | | FBL  FRK  FSmax  FV | N  N  N  N | 13.400  17.420  30.820  26.350 |
| --- | --- | --- | --- | --- |
| Wie groß ist das Gewindemoment, das Kopfreibungsmoment und das Anzugsmoment? | | MGew  MKR  Manz | Nm  Nm  Nm | 31,36  18,81  50,17 |
| Wie groß ist die Zugspannung in der Schraube? | | Z | N/mm² | 531 |
| Welche Schubspannung wird in der Schraube hervorgerufen? | | t | N/mm² | 252 |
| Mit welcher Vergleichsspannung wird die Schraube belastet? | | V | N/mm² | 687 |
| Welche Schraubengüte ist erforderlich? Markieren Sie die Schraubengüte durch Ankreuzen. | 3.6 4.6 4.8 5.6 5.8  6.8 8.8 9.8 **10.9** 12.9 | | | |
| Auf welchen Betrag kann der Innendruck der Rohrleitung unter ansonsten gleichen Bedingungen gesteigert werden, wenn Schrauben der Festigkeitsklasse 12.9 verwendet werden? | | p12.9 | bar | 125,7 |

# Druckbehälter statisch belastet II

z: Anzahl der Schrauben

p = 12 bar = 12 * 105 N/m² und

FRK = 2 * FBL =28.274 N FSmax = FBL + FRK = 42.411 N

FV = = 37.699 N

Mgesanz = MGewanz + MKR = 46,4 Nm + 33,9 Nm = 80,34 Nm

Mgeslös = MGewlös - MKR = -24,7 Nm - 33,9 Nm = -58,6 Nm

V = = 624 N/mm²

Schraubengüte 8.8: zul = 0,8 * 800 N/mm² = 640 N/mm²

Schraubengüte 12.9: zul = 0,9 * 1.200 N/mm² = 1.080 N/mm²

| Wie groß ist die Betriebskraft auf jede einzelne Schraube? | | FBL | N | 14.137 |
| --- | --- | --- | --- | --- |
| Welche Restdichtkraft wird an der Trennfuge wirksam? | | FRK | N | 28.274 |
| Mit welcher Kraft wird die maximal belastet? | | FSmax | N | 42.411 |
| Mit welcher Kraft müssen die Schrauben vorgespannt werden? | | FV | N | 37.699 |
| Wie groß ist das Gewindemoment beim Anziehen der Schraube? | | MGewanz | Nm | 46,6 |
| Welches Moment ist zum Lösen des Gewindes erforderlich? | | MGewlös | Nm | 24,7 |
| Mit welchem Gesamtmoment müssen die Schrauben angezogen werden? | | Mgesanz | Nm | 80,34 |
| Welches Gesamtmoment ist erforderlich, um die Schrauben zu lösen? | | Mgeslös | Nm | 24,7 |
| Wie groß ist die Zugspannung in der Schraube? | | Z | N/mm² | 503 |
| Welche Schubspannung wird in der Schraube hervorgerufen? | | t | N/mm² | 213 |
| Mit welcher Vergleichsspannung wird die Schraube belastet? | | V | N/mm² | 624 |
| Welche Schraubengüte ist erforderlich? Markieren Sie die Schraubengüte durch Ankreuzen. | 3.6 4.6 4.8 5.6 5.8  6.8 **8.8** 9.8 10.9 12.9 | | | |
| Auf welchen Wert könnte der Kesseldruck gesteigert werden, wenn unter ansonsten gleichbleibenden Bedingungen die Schraubengüte 12.9 verwendet würde? | | p12.9 | bar | 20,8 |

# Rohrleitungsflansch III

Kräfte für die gesamte Schraubverbindung:

Kraft für die einzelne Schraube:

FRK = 1,8 * FBL = 36,82kN

FSmax = FRK + FBL = 36,82 kN + 20,45 kN = 57,27 kN

MKR = 0,8 MGew = 0,8 * 62,09 Nm = 49,67 Nm

Manz = MGew + MKR = 62,09 Nm + 49,67 Nm = 111,76 Nm

V =

Schraubengüte 10.9 mit zul = 900 N/mm²

Schraubengüte 12.9 mit zul = 1.080 N/mm²



| Berechnen Sie zunächst die an der einzelnen Schraube wirkende Betriebskraft, die Restklemmkraft, die maximale Schraubenkraft und die Vorspannkraft. | | FBL  FRK  FSmax  FV | kN  kN  kN  kN | 20,45  36,82  57,27  50,45 |
| --- | --- | --- | --- | --- |
| Wie groß ist das Gewindemoment, das Kopfreibungsmoment und das Anzugsmoment? | | MGew  MKR  Manz | Nm  Nm  Nm | 62,09  49,67  111,76 |
| Wie groß ist die Zugspannung in der Schraube?  Welche Schubspannung wird in der Schraube hervorgerufen?  Mit welcher Vergleichsspannung wird die Schraube belastet? | | Z  t  V | N/mm²  N/mm²  N/mm² | 679  285  839 |
| Welche Schraubengüte ist erforderlich? Markieren Sie die Schraubengüte durch Ankreuzen. | 3.6 4.6 4.8 5.6 5.8  6.8 8.8 9.8 **10.9** 12.9 | | | |
| Auf welchen Betrag kann der Innendruck der Rohrleitung unter ansonsten gleichen Bedingungen gesteigert werden, wenn Schrauben der Festigkeitsklasse 12.9 verwendet werden? | | p12.9 | bar | 64,3 |

# Rohrleitungsflansch IV

Kräfte für die gesamte Schraubverbindung:

Kraft für die einzelne Schraube:

FRK = 1,5 * FBL = 23,56kN

FSmax = FRK + FBL = 15,71 kN + 23,56 kN = 39,27 kN

MKR = 0,8 MGew = 0,8 * 68,65 Nm = 54,92 Nm

Manz = MGew + MKR = 68,65 Nm + 54,92 Nm = 123,57 Nm

V =

Schraubengüte 3.6 mit zul = 180 N/mm²



|  | Berechnen Sie zunächst die an der einzelnen Schraube wirkende Betriebskraft, die Restklemmkraft sowie die maximale Schraubenkraft! | FBL  FRK  FSmax | | N  N  N | 15.710  23.560  39.270 |
| --- | --- | --- | --- | --- | --- |
|  | Mit welcher Kraft muss die Schraube vorgespannt werden? | FV | | N | 34.030 |
|  | Wie groß ist das Gewindemoment, das Kopfreibungsmoment und das Anzugsmoment? | MGew  MKR  Manz | | Nm  Nm  Nm | 68,65  54,92  123,57 |
| Kennzeichnen Sie durch Ankreuzen die Schraubengüte, die erforderlich ist, um die Festigkeit der Verbindung sicherzustellen? | | | **3.6** - 4.6 - 4.8 - 5.6 - 5.8  6.8 - 8.8 - 10.9 – 12.9 | | |
|  | Auf welchen Betrag kann der Innendruck der Rohrleitung unter ansonsten gleichen Bedingungen gesteigert werden, wenn Belastbarkeit der Schrauben vollständig ausgenutzt wird? | pmax | | bar | 28,1 |

# Druckbehälter statisch und dynamisch belastet III

z: Anzahl der Schrauben

p = 26 bar = 26 * 105 N/m² und

FRK = 0,4 * FBL = 12763 N FSmax = FBL + FRK = 44670 N

Konstruktionsvariante A wird mit einem statischen Druck von 26 bar belastet

Je nach Annahme, wie sich die federnde Schraubenlänge auf Schaft- und Gewindeanteil aufteilt, ergeben sich andere Zahlenwerte. Die Annahme, dass die federnde Schraubenlänge nur aus Schaft besteht, ergibt die höchste Steifigkeit, man befindet sich also auf der „sicheren Seite“.

FSmin = FSmax = 44670 N

Konstruktionsvariante A wird mit einem Druck belastet, der zwischen 0 und 26 bar pulsiert

wie zuvor

wie zuvor

FSmin =

Konstruktionsvariante B wird mit einem Druck belastet, der zwischen 0 und 26 bar pulsiert

FSmin =

Konstruktionsvariante C wird mit einem Druck belastet, der zwischen 0 und 26 bar pulsiert

 cSH = 604 N/µm

FSmin =

|  |  | Variante A  statischer Druck  26 bar | Variante A  dynamischer  Druck zwischen  0 und 26 bar pulsierend | Variante B  dynamischer  Druck zwischen  0 und 26 bar pulsierend | Variante C  dynamischer  Druck zwischen  0 und 26 bar pulsierend |
| --- | --- | --- | --- | --- | --- |
| cZ | N/µm | 1900 | 1900 | 1900 | 1900 |
| cS bzw. cSH | N/µm | 1188 | 1188 | 825 | 604 |
| FBL | N | 31907 | 31907 | 31907 | 31907 |
| FRK | N | 12763 | 12763 | 12763 | 12763 |
| FV | N | 32395 | 32395 | 35010 | 36974 |
| FSmax | N | 44670 | 44670 | 44670 | 44670 |
| FSmin | N | 44670 | 32395 | 35010 | 36974 |
| FSstat | N | 44670 | 38533 | 39840 | 40822 |
| FSdyn | N | 0 | 6138 | 4830 | 3848 |
| Zstat | N/mm² | 530 | 457 | 687 | 484 |
| Zdyn | N/mm² | 0 | 73 | 83 | 56 |

# Ausschlagspannung Schrauben

Schraubensteifigkeit:

für M8:

für M10:

für M12:

Zwischenlagensteifigkeit:

für M8: dK = SW = 13; DA = 34 mm  dK  DA  3 * dK

Gl. 4.64

für M10: dK = SW = 17; DA = 34 mm  dK  DA  3 * dK

für M12: dK = SW = 19; DA = 34 mm  dK  DA  3 * dK

für M8:

für M10:

für M12:

für M8:

für M10:

für M12:

FBZ = FBL - FBS für M8: FBZ = 20.000 N – 2.640 N = 17.360 N

für M10: FBZ = 20.000 N – 3.600 N = 16.400 N

für M12: FBZ = 20.000 N – 4.820 N = 15.180 N

 für M8:

für M10:

für M12:

für M8:

für M10:

für M12:

|  |  | M8 | M10 | M12 |
| --- | --- | --- | --- | --- |
| cS | [N/µm] | 96 | 152 | 221 |
| cZ | [N/µm] | 633 | 693 | 695 |
|  |  | 0,132 | 0,180 | 0,241 |
| FBS | [N] | 2.640 | 3.600 | 4.820 |
| FBZ | [N] | 17.360 | 16.400 | 15.180 |
| fB | [µm] | 27,5 | 23,7 | 21,8 |
| A | [N/mm²] | 36,1 | 31,0 | 25,3 |

# Druckbehälter dynamisch belastet II

a.  F = p * A mit

FBLmax = =7.854 N FRK = 7.854 N

FBLmin = = 4.909 N

c. FV = = 12.566 N

1. FSmax = FRK + FBLmax = 2 * FBLmax = 15.708 N

FSmin = = 14.530 N

1.  Zstat = = 260,7 N/mm²

Vstat =

 Zdyn = = 10 N/mm² = Vdyn

| Wie groß ist die auf die einzelne Schraube wirkende maximale Betriebskraft, die minimale Betriebskraft und die Restklemmkraft? | FBLmax  FBLmin  FRK | N  N  N | 7.854  4.909  7.854 |
| --- | --- | --- | --- |
| Wie groß ist die Vorspannkraft? | FV | N | 12.566 |
| Wie groß ist die maximale und die minimale Kraft auf die Schraube während des pulsierenden Druckbetriebes? | FSmax  FSmin | N  N | 15.708  14.530 |
| Wie groß ist die statische und die dynamische Vergleichsspannung in der Schraube? | Vstat  Vdyn | N/mm²  N/mm² | 302  10 |

# Druckbehälter dynamisch belastet III

a.  F = p * A mit

FBLmax =

FBLmin =

1. FRK = 2 * FBLmax = 2 * 9.425 N = 18.850 N

FV =

c. FSmax = FRK + FBLmax = 18.850 N + 9.425 N = 28.275 N

FSmin =

d.


Vstat =

| a | FBLmax | N | 9.425 | FBLmin | N | 5.890 |
| --- | --- | --- | --- | --- | --- | --- |
| b | FRK | N | 18.850 | FV | N | 24.505 |
| c | FSmax | N | 28.275 | FSmin | N | 26.861 |
| d | FSstat | N | 27.568 | FSdyn | N | 707 |
| e | Vstat | N/mm² | 385 | Vdyn | N/mm² | 8 |
