# Supplementary material
Source: publisher site journal article supplement (https://www.degruyterbrill.com/publication/isbn/9783110692143/downloadAsset/9783110692143_Zusatzmaterial_Basiswissen.zip)
Supplement: Supplementary file 11 [file Basiswissen, Zusatzaufgaben Kapitel 5, Aufgaben.doc]

Hochschule Trier, Fachbereich Technik

Prof. Dr.-Ing. Hubert Hinzen

Maschinenelemente Kapitel 5:

Lager

Aufgabensammlung B

Stand: 21.03.2023

Inhalt

[1 Lagerung Flaschenzug ohne Lastkollektiv 2](#__RefHeading___Toc130311295)

[2 Seilrollenlagerung II 4](#__RefHeading___Toc130311296)

[3 Seilscheibenlagerung mit Lastkollektiv I 6](#__RefHeading___Toc130311297)

[4 Seilscheibenlagerung mit Zylinderrollenlagern 7](#__RefHeading___Toc130311298)

[5 Schneckenradlagerung II 8](#__RefHeading___Toc130311299)

# Lagerung Flaschenzug ohne Lastkollektiv

*Diese Aufgabe sollte vorzugsweise nach dem Vorlesungskapitel 5.2.3.3. behandelt werden.*

Der Flaschenzug erlaubt es, große Lasten mit relativ geringen Seilkräften anzuheben. Die unten stehende Konstruktion nutzt diesen Effekt gleich doppelt aus. Es ist eine Masse von 1t anzuheben, die Hubhöhe beträgt 10 m. Sowohl die Aufwärts- als auch die Abwärtsbewegung vollzieht sich unter Last. Es sollen 10.000 Hubvorgänge ausgeführt werden können, bevor die Lager erneuert werden müssen.


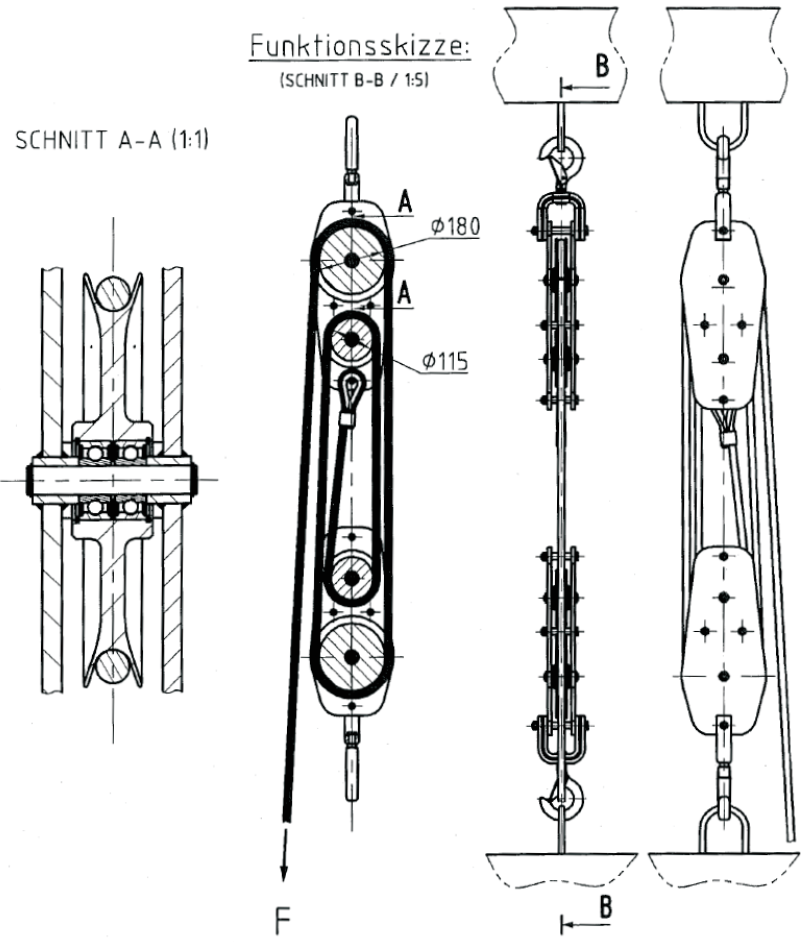


Ermitteln Sie die erforderliche Tragzahl für die verwendeten Lager. Berechnen Sie zweckmäßigerweise zuvor die auf das einzelne Lager wirkende Kraft, die Überrollungen des Lagers für einen Hubvorgang sowie den Lebensdauerkennwert L10.

|  | Kraft auf das einzelne Lager | Überrollungen pro Hubvorgang | Lebensdauer-kennwert L10 | erforderliche Tragzahl |
| --- | --- | --- | --- | --- |
|  | N | - | - | N |
| obere Rolle Oberflasche |  |  |  |  |
| untere Rolle Oberflasche |  |  |  |  |
| obere Rolle Unterflasche |  |  |  |  |
| untere Rolle Unterflasche |  |  |  |  |

# Seilrollenlagerung II

*Diese Aufgabe sollte vorzugsweise nach dem Vorlesungskapitel 5.2.3.3. behandelt werden.*

Die unten dargestellte Seilrollenlagerung wird in zwei Konstruktionsvarianten (links mit einem Kugellager und rechts mit zwei Kugellager) ausgeführt, die Betriebsbedingungen sind für beide Fälle gleich: Es ist eine Last von 2 t auf eine Hubhöhe von 6 m anzuheben und dann wieder abzusetzen. Die Lager sollen 10.000 Hubvorgänge überdauern, bevor sie ausgetauscht werden müssen.


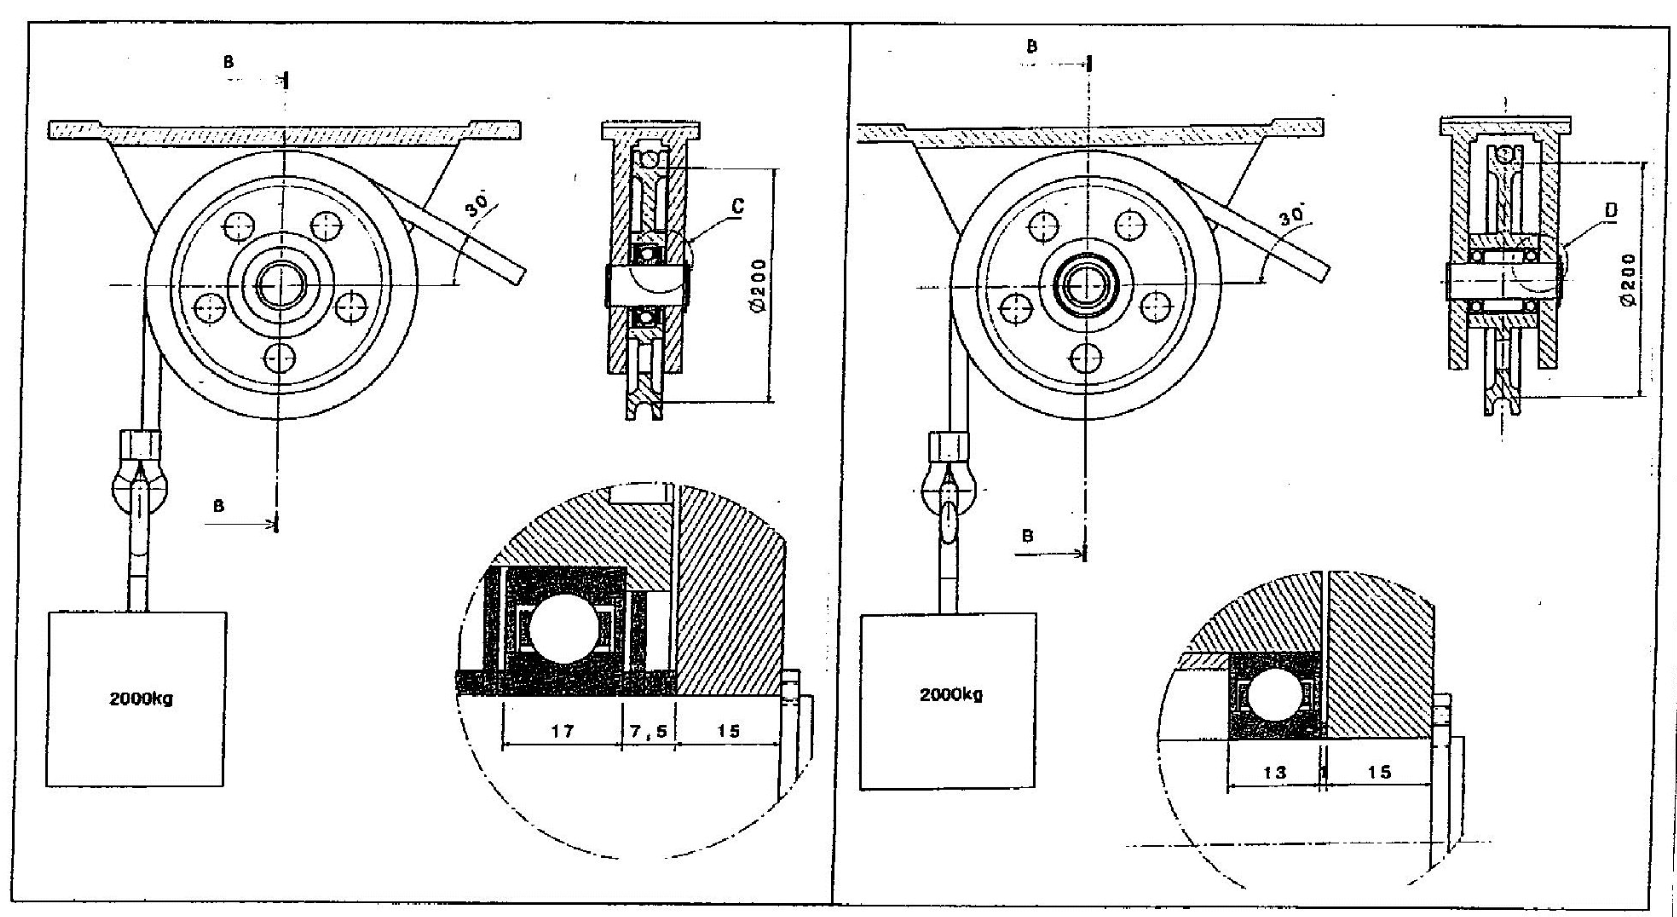


1. Berechnen Sie zunächst die durch das Seil eingeleitete resultierende Kraft für die gesamte Lagerung!
2. Es kann angenommen werden, dass die Belastung in die Achse in Lagerebene eingeleitet wird und in der Mitte der äußeren Lasche abgestützt wird. Berechnen Sie die in der Lagerebene wirksame Querkraft Q sowie das Biegemoment Mb!
3. Ermitteln Sie für den jeweils angegebenen Achsdurchmesser den Querkraftschub τQ, die Biegespannung σb sowie die Vergleichsspannung σV!
4. Welche Last P wird im Lager übertragen?
5. Wie viele Überrollungen erfährt das Lager innerhalb der geforderten Gebrauchsdauer und wie groß ist der Kennwert L10?
6. Welche Tragzahl ist erforderlich?

|  |  |  | ein Lager | zwei Lager |
| --- | --- | --- | --- | --- |
| a | Gesamtkraft Fges | N |  |  |
|  | **Festigkeit Achse** |  |  |  |
| b | Querkraft Q | N |  |  |
|  | Biegemoment Mb | Nm |  |  |
| c | Achsdurchmesser d | mm | 35 | 30 |
|  | Querkraftschub τQ | N/mm² |  |  |
|  | Biegespannung σb | N/mm² |  |  |
|  | Vergleichsspannung σV | N/mm² |  |  |
|  | **Gebrauchsdauer Lager** |  | **Lagertyp 6207**  **C = 25.500 N** | **Lagertyp 6006**  **C = 13.300 N** |
| d | Lagerlast P | N |  |  |
| e | Anzahl der Überrollungen | - |  |  |
|  | Lebensdauerkennwert L10 | - |  |  |
| f | erforderliche Tragzahl C | N |  |  |

# Seilscheibenlagerung mit Lastkollektiv I

*Diese Aufgabe sollte vorzugsweise nach dem Vorlesungskapitel 5.2.3.3. behandelt werden.*

| 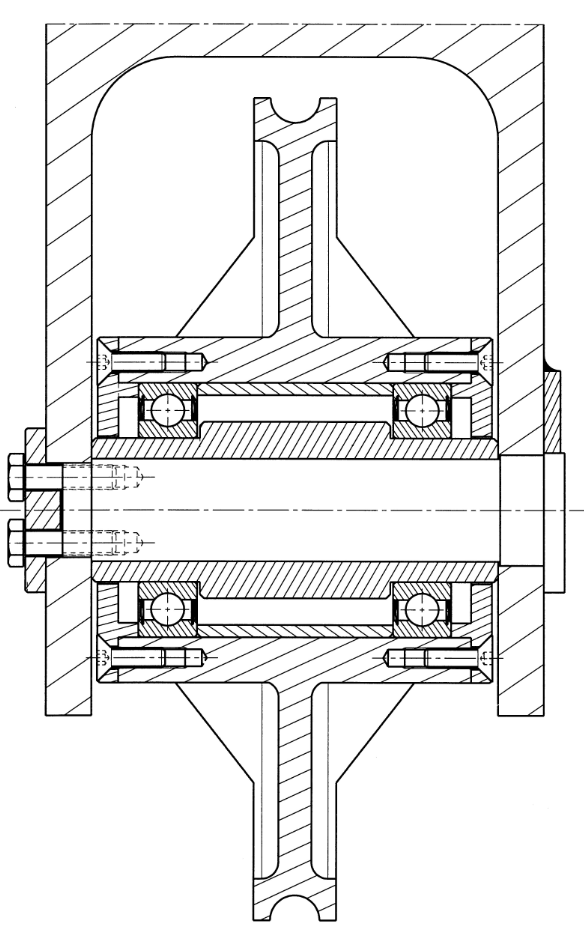 | Die nebenstehend dargestellte Seilrolle wird mit zwei Rillenkugellagern des Typs 6007.2RS ausgestattet, die jeweils eine Tragzahl von 15.900 N aufweisen. Das unter einer Zugkraft von 12 kN stehende Seil umschlingt diese Umlenkrolle um 180°. Der effektive Seilrollendurchmesser beträgt 274 mm. Es gelten die folgende Betriebsbedingungen:   - Die Hubhöhe beträgt 3,5 m. - Stündlich sind 25 Hubvorgänge (auf und ab unter Last) auszuführen. - An 220 Betriebstagen pro Jahr wird die Lagerung an 14 Stunden pro Tag betrieben.   Die beförderte Last ist nicht konstant, sondern es kann folgende zeitliche Verteilung angenommen werden:  10% Maximallast  20% Dreiviertellast  20% halbe Last  50% Leerlauf (Leerfahrten) |
| --- | --- |

| Wie groß ist die maximale Lagerlast für das einzelne Lager? | Fmax [N] = |  |
| --- | --- | --- |
| Wie groß ist die äquivalente Lagerlast für das einzelne Lager? | Pm [N] = |  |
| Wie viele Jahre wird das Lager der Belastung standhalten? | a [-] |  |

# Seilscheibenlagerung mit Zylinderrollenlagern

*Diese Aufgabe sollte vorzugsweise nach dem Vorlesungskapitel 5.2.3.3. behandelt werden.*

| 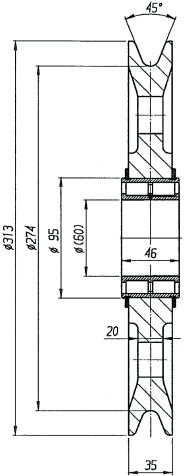 | Die nebenstehend dargestellte Seilrolle wird mit einem zweireihigen Zylinderrollenlager ausgestattet. Das unter einer Zugkraft von 12 kN stehende Seil umschlingt die Umlenkrolle auf 90°. Die dynamische Tragzahl der kompletten Lagereinheit beträgt 37400 N. Für die Gebrauchsdauerberechnung gelten folgende Randbedingungen:   - Die Hubhöhe beträgt 3,5 m. - Stündlich sind 25 Hubvorgänge (auf und ab) auszuführen. - An 220 Betriebstagen pro Jahr wird die Lagerung an 14 Stunden pro Tag betrieben.   Die beförderte Last ist nicht konstant, sondern es kann folgende zeitliche Verteilung angenommen werden:   - 10% Maximallast - 20% Dreiviertellast - 20% halbe Last - 50% Leerlauf (Leerfahrten) |
| --- | --- |

1. Wie groß ist die äquivalente Lagerlast?
2. Wie viele Jahre wird das Lager der Belastung standhalten?

# Schneckenradlagerung II

*Diese Aufgabe sollte vorzugsweise nach dem Vorlesungskapitel 5.2.3.3. behandelt werden.*

Es soll eine Schneckenradlagerung nach untenstehendem Beispiel konstruiert und dimensioniert werden:


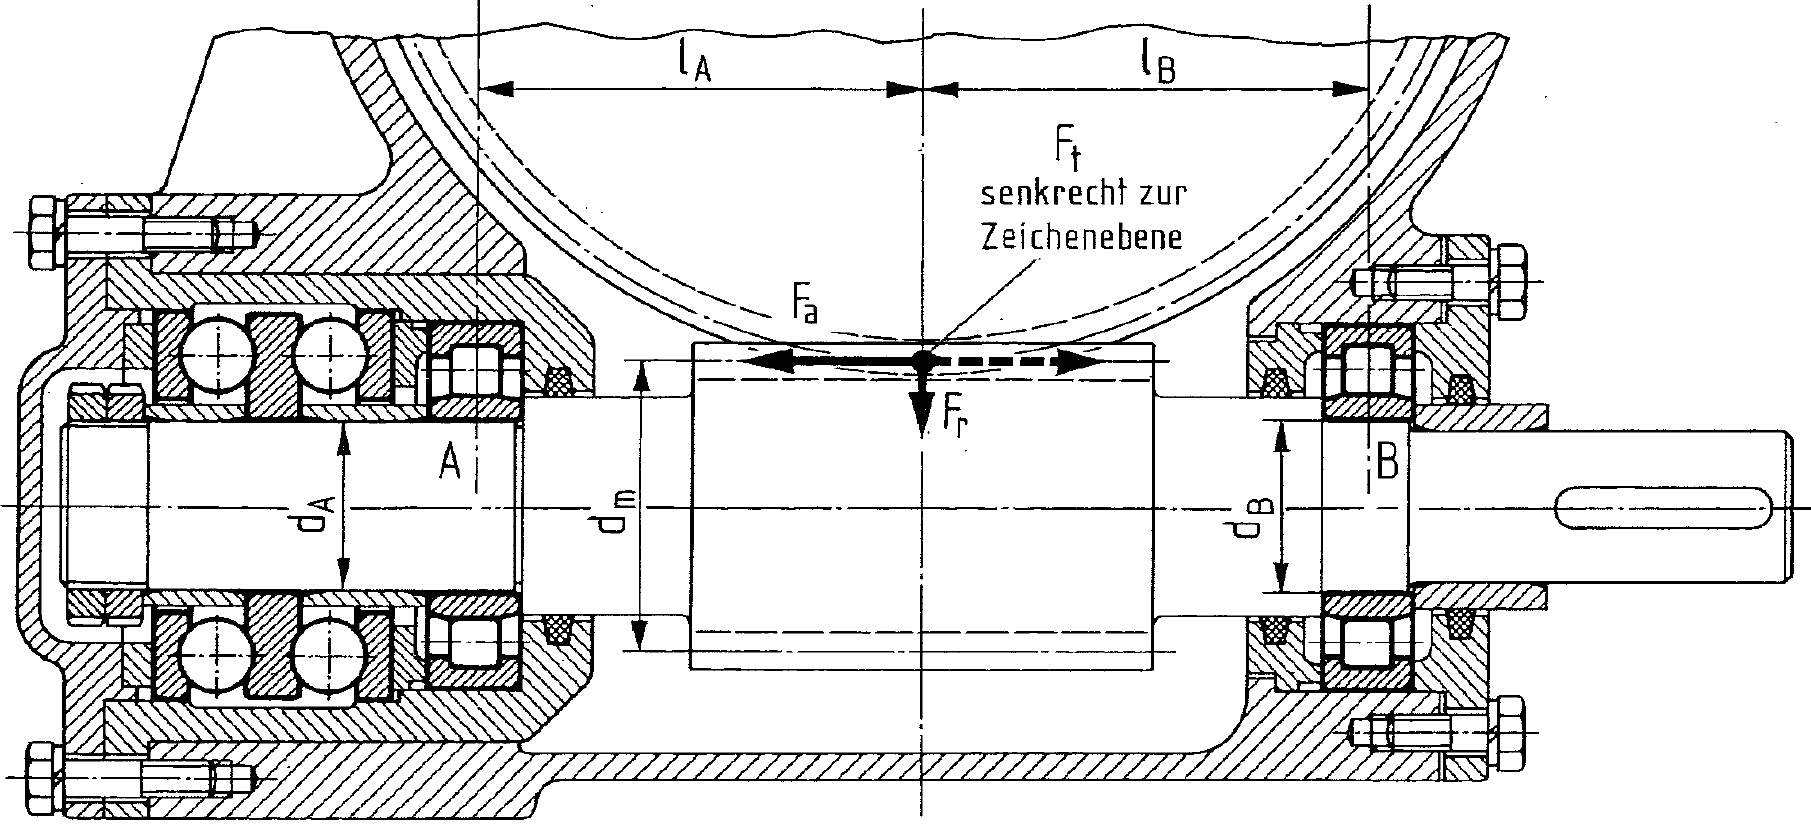


Die Schnecke dreht sich jeweils zur Hälfte ihrer Betriebsdauer in die eine bzw. in die andere Drehrichtung. Die dabei entstehende Axialkraft Fa = 15kN stützt sich je nach Drehrichtung nach rechts oder nach links ab. Es kann vereinfachend angenommen werden, daß Fa in Wellenmitte angreift, die Abstände lA und lB sind gleich groß. Aufgrund der Verzahnungsgeometrie werden weiterhin eine Tangentialkraft Ft = 2,1 kN und eine Radialkraft Fr = 4,0 kN wirksam. Das Getriebe wird zur Hälfte seiner Betriebsdauer mit Volllast und zur anderen Hälfte mit halber Last betrieben. Die Schneckenwelle läuft bei einer Drehzahl von 800 min-1 und soll eine Lebensdauer von 10.000 h erreichen.

Berechnen Sie die erforderliche Tragzahl für jedes der beiden Axial- bzw. Radiallager. Dokumentieren Sie Zwischenergebnisse in untenstehendem Schema.

|  |  | Radiallager | Axiallager |
| --- | --- | --- | --- |
| Kraft bei Volllast | N |  |  |
| äquivalente Lagerlast | N |  |  |
| L10 | - |  |  |
| erforderliche Tragzahl | N |  |  |
