# Supplementary material
Source: publisher site journal article supplement (https://www.degruyterbrill.com/publication/isbn/9783110692143/downloadAsset/9783110692143_Zusatzmaterial_Basiswissen.zip)
Supplement: Supplementary file 12 [file Basiswissen, Zusatzaufgaben Kapitel 5, Lösungen.doc]

Hochschule Trier, Fachbereich Technik

Prof. Dr.-Ing. Hubert Hinzen

Maschinenelemente Kapitel 5:

Lager

Aufgabensammlung B

Lösungen

Stand: 21.03.2023

Inhalt

[1 Lagerung Flaschenzug ohne Lastkollektiv 2](#__RefHeading___Toc130311456)

[2 Seilrollenlagerung II 4](#__RefHeading___Toc130311457)

[3 Seilscheibenlagerung mit Lastkollektiv I 6](#__RefHeading___Toc130311458)

[4 Seilscheibenlagerung mit Zylinderrollenlagern 7](#__RefHeading___Toc130311459)

[5 Schneckenradlagerung II 8](#__RefHeading___Toc130311460)

# Lagerung Flaschenzug ohne Lastkollektiv

maximale Gewichtskraft FG = 1.000 kg * 9,81 m/s² = 9.810 N

Wenn die Unterflasche (Haken mit unteren Seilrollen) im Sinne der Mechanik freigeschnitten wird, so steht die nach unten gerichtete Gewichtskraft im Gleichgewicht mit 4 untereinander gleich großen, nach oben gerichteten Seilkräften:

Jede einzelne Seilscheibe wird mit zwei Seilkräften belastet, die sich in zwei Lagern abstützen. Aus diesem Grund ist die Lagerkraft genau so groß wie die Seilkraft.

Die volle Seillänge beträgt das Vierfache der Hubhöhe von 10 m: L = 4 * 10 m = 40 m

- über die obere Rolle der Oberflasche wird die gesamte Seillänge bei einem Rollendurchmesser von 180 mm abgewickelt:
  Anzahl der Überrollungen pro Hubvorgang
  Faktor 2 wegen Auf- und Abbewegung
  Gesamtanzahl der Überrollungen 141,5 * 10.000 = 1.415.000  L10 = 1,415
  erforderliche Tragzahl: 
- über die untere Rolle der Unterflasche werden 30 m Seillänge bei einem Rollendurchmesser von 180 mm abgewickelt:
  Anzahl der Überrollungen pro Hubvorgang
  Gesamtanzahl der Überrollungen 106,1 * 10.000 = 1.061.000  L10 = 1,061
  erforderliche Tragzahl:
- über die untere Rolle der Oberflasche werden 20 m Seillänge bei einem Rollendurchmesser von 115 mm abgewickelt:
  Anzahl der Überrollungen pro Hubvorgang
  Gesamtanzahl der Überrollungen 110,7 * 10.000 = 1.107.000  L10 = 1,107
  erforderliche Tragzahl:
- über die obere Rolle der Unterflasche werden 10 m Seillänge bei einem Rollendurchmesser von 115 mm abgewickelt:
  Anzahl der Überrollungen pro Hubvorgang
  Gesamtanzahl der Überrollungen 55,4 * 10.000 = 554.000  L10 = 0,554
  erforderliche Tragzahl:

|  | Kraft auf das einzelne Lager | Überrollungen pro Hubvorgang | Lebensdauer-kennwert L10 | erforderliche Tragzahl |
| --- | --- | --- | --- | --- |
|  | N | - | - | N |
| obere Rolle Oberflasche | 2.452 | 141,5 | 1,415 | 2.753 |
| untere Rolle Oberflasche | 2.452 | 110,7 | 1,107 | 2.537 |
| obere Rolle Unterflasche | 2.452 | 55,4 | 0,554 | 2.014 |
| untere Rolle Unterflasche | 2.452 | 106,1 | 1,061 | 2.501 |

# Seilrollenlagerung II

1. FSeil = 2.000 kg * 9,81 m/s² = 19.620 N

Resultierende Kraft in der durch das Seil aufgespannten Ebene:

b.

ein Lager:

zwei Lager:

c.

ein Lager:

zwei Lager:

ein Lager:

zwei Lager:

ein Lager:

zwei Lager:

d. ein Lager: P = Fges = 33.983 N

zwei Lager:

e. Anzahl Überrollungen =

L10 drückt die Anzahl der Überrollungen in Millionen aus:

f. 

ein Lager:

zwei Lager:

|  |  |  | ein Lager | zwei Lager |
| --- | --- | --- | --- | --- |
| a | Gesamtkraft Fges | N | 33.983 | 33.983 |
|  | **Festigkeit Achse** |  |  |  |
| b | Querkraft Q | N | 16.991 | 16.991 |
|  | Biegemoment Mb | Nm | 399 | 255 |
| c | Achsdurchmesser d | mm | 35 | 30 |
|  | Querkraftschub τQ | N/mm² | 17,7 | 24,0 |
|  | Biegespannung σb | N/mm² | 94,9 | 96,1 |
|  | Vergleichsspannung σV | N/mm² | 99,7 | 104.7 |
|  | **Gebrauchsdauer Lager** |  | **Lagertyp 6207**  **C = 25.500 N** | **Lagertyp 6006**  **C = 13.300 N** |
| d | Lagerlast P | N | 33.983 | 16.991 |
| e | Anzahl der Überrollungen | - | 190.986 | 190.986 |
|  | Lebensdauerkennwert L10 | - | 0,191 | 0,191 |
| f | erforderliche Tragzahl C | N | 19.570 | 9.785 |

# Seilscheibenlagerung mit Lastkollektiv I

resultierende Lagerlast bei Volllast:

Faktor wegen Umschlingungswinkel 180°; Faktor ½ wegen Lastverteilung auf zwei Lager

äquivalente Lagerlast:

Anzahl der Überrollungen pro Hubvorgang:

Faktor 2 wegen Auf- und Abfahrt

Anzahl der Überrollungen pro Jahr:

(entspricht 11,110 * 106 Überrollungen)

Lebensdauer in Jahren:

| Wie groß ist die maximale Lagerlast für das einzelne Lager? | Fmax [N] = | 12.000 |
| --- | --- | --- |
| Wie groß ist die äquivalente Lagerlast für das einzelne Lager? | Pm [N] = | 7.126 |
| Wie viele Jahre wird das Lager der Belastung standhalten? | a [-] | 17,7 |

# Seilscheibenlagerung mit Zylinderrollenlagern

1. resultierende Lagerlast bei Volllast:

äquivalente Lagerlast:

1. Anzahl der Überrollungen pro Hubvorgang:

Faktor 2 wegen Auf- und Abfahrt

Anzahl der Überrollungen pro Jahr:

(entspricht 70,887 * 106 Überrollungen)

Lebensdauer in Jahren:

# Schneckenradlagerung II

Kraft bei Volllast

radial:

axial: Fax = 15 kN

äquivalente Lagerlast:

radial:

axial:

erforderliche Tragzahlen:

radial:

axial:

|  |  | Radiallager | Axiallager |
| --- | --- | --- | --- |
| Kraft bei Volllast | N | 2259 | 15000 |
| äquivalente Lagerlast | N | 1888 | 9828 |
| L10 | - | 480 | 480 |
| erforderliche Tragzahl | N | 12.030 | 76.950 |
