# Supplementary material
Source: publisher site journal article supplement (https://www.degruyterbrill.com/publication/isbn/9783110692143/downloadAsset/9783110692143_Zusatzmaterial_Basiswissen.zip)
Supplement: Supplementary file 13 [file Basiswissen, Zusatzaufgaben Kapitel 6, Aufgaben.doc]

Hochschule Trier, Fachbereich Technik

Prof. Dr.-Ing. Hubert Hinzen

Maschinenelemente Kapitel 6:

Welle-Nabe-Verbindungen

Aufgabensammlung B

Stand: 30.03.2020

Inhalt

[1 Miniflex 2](#__RefHeading___Toc36476728)

[2 Sichelbefestigung Motorrasenmäher 4](#__RefHeading___Toc36476729)

[3 Hilfsantrieb 6](#__RefHeading___Toc36476730)

[4 Radialer Klemmverband, Variation der Ansätze II 8](#__RefHeading___Toc36476731)

# Miniflex

*Diese Aufgabe sollte vorzugsweise nach dem Vorlesungskapitel 6.3.1.1. behandelt werden.*

| 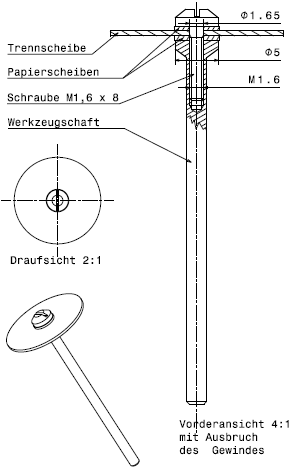 | Die nebenstehend abgebildete kleine Trennscheibe ("Miniflex") wird vorwiegend im Modellbau und in der Elektronik zur trennenden und schleifenden Bearbeitung kleiner Werkstücke benutzt. Die Trennscheibe wird mit einer zentralen Schraube auf einem Werkzeugschaft montiert, der seinerseits vom (hier nicht dargestellte) Spannzeug einer hochtourige Minibohrmaschine aufgenommen wird. Zur gleichmäßigen Übertragung der axialen Kraft wird die Trennscheibe zwischen zwei Papierscheiben gefasst. Da die Trenn- bzw. Schleifscheibe zwischen zwei Flansche gefasst wird, wird das am Werkzeug eingeleitete Torsionsmoment also zunächst einmal in einer Parallelschaltung von zwei Reibschlüssen auf diese beiden Flansche übertragen. Da jedoch der obere Flansch über eine vergleichsweise verdrehweiche Schraubverbindung an die Welle angekoppelt ist, wird es zu einer stark ungleichmäßigen Aufteilung des Torsionsmomentes auf die beiden Flansche kommen. Deshalb wird sicherheitshalber angenommen, dass das Moment ausschließlich über den unteren Flansch übertragen wird. |
| --- | --- |

Es wird eine mechanische Leistung von 40 W bei einer Drehzahl von 20.000 min-1 übertragen. Durch die Papierzwischenlage wird ein Reibwert von 0,12 erzielt. Der Reibwert am Kopf und im Gewinde der Schraube kann ebenfalls mit 0,12 angenommen werden.

| Welches Torsionsmoment ist zu übertragen? | | Mt | Nmm |  |
| --- | --- | --- | --- | --- |
| Welcher Hebelarm ist für die Momentenübertragung zwischen Werkzeug und Flansch maßgebend? | | rm | mm |  |
| Welche Axialkraft muss für die Momentenübertragung zwischen Werkzeug und Flansch aufgebracht werden? | | Fax | N |  |
| Welche Flächenpressung entsteht zwischen Werkzeug und Flansch? | | p | N/mm² |  |
| Welches Gewindemoment muss durch an der Schraube aufgebracht werden, um den Reibschluss des axialen Klemmverbandes sicher zu stellen? | | MGew | Nmm |  |
| Mit welchem Gesamtmoment muss angezogen werden? | | Mges | Nmm |  |
| Das Anzugsmoment der Schraube wird durch Arretieren des Werkzeugschafts abgestützt. Ist es auch möglich, das Moment durch Blockieren der Trennscheibe (also noch vor dem Einführen des Werkzeugschafts in das Spannzeug der Bohrmaschine) abzustützen? Begründen Sie Ihre Aussage durch Ankreuzen. | O ja  O nein  weil O MGewinde < MFlansch-Schleifscheibe  weil O MGewinde ≥ MFlansch-Schleifscheibe | | | |

# Sichelbefestigung Motorrasenmäher

*Diese Aufgabe sollte vorzugsweise nach dem Vorlesungskapitel 6.3.1.1. behandelt werden.*

Das sichelförmige, rotationssymmetrische Messer eines handelsüblichen Rasenmähers mit Verbrennungsmotor wird mittels eines axialen Klemmverbandes mit der Welle verbunden. Der Antriebsmotor erbringt eine Leistung von 3 kW bei einer Drehzahl von 2.800 min-1.

| 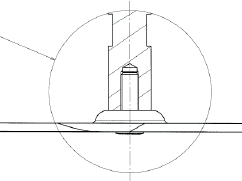 | 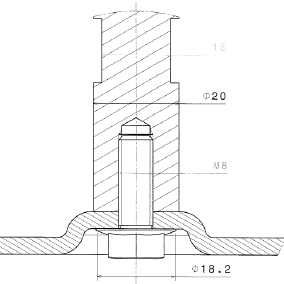 |
| --- | --- |

Zwischen Messer und Welle wird sicherheitshalber ein Reibwert von 0,08 angenommen. Der Reibwert am Kopf und im Gewinde der Schraube beträgt 0,12. Es wird eine Schraube der Festigkeitsklasse 8.8 verwendet.

| Welches Torsionsmoment ist zu übertragen? | | Mt | Nm |  |
| --- | --- | --- | --- | --- |
| Welcher Hebelarm ist für die Momentenübertragung zwischen Welle und Sichel maßgebend? | | rm | mm |  |
| Welche Axialkraft muss für die Momentenübertragung aufgebracht werden? | | Fax | N |  |
| Welche Flächenpressung stelle sich zwischen Sichel und Welle ein? | | p |  |  |
| Welches Gewindemoment muss durch an der Schraube aufgebracht werden, um den Reibschluss am axialen Klemmverbänden sicher zu stellen? | | MGew | Nm |  |
| Welches Kopfreibungsmoment entsteht zwischen Schraube und Messer? | | MKR | Nm |  |
| Mit welchem Gesamtmoment muss mindestens angezogen werden, um den Reibschluss der Welle-Nabe-Verbindung sicher zu stellen? | | Mges | Nm |  |
| Mit welchem Gesamtmoment darf unter Berücksichtigung der Schraubenfestigkeit höchstens angezogen werden? | | Mgesmax | Nm |  |
| Das Anzugsmoment der Schraube wird mit einem Schraubschlüssel an der Welle abgestützt. Ist es auch möglich, das Moment ohne Schraubschlüssel durch Blockieren des Messers abzustützen? Begründen Sie Ihre Aussage durch Ankreuzen. | O nein  O ja  weil O Mgesanz ≥ MWNV  weil O MGew ≥ MWNV  weil O MKopfreibung ≥ MWNV  weil O Mgesanz < MWNV  weil O MGew < MWNV  weil O MKopfreibung < MWNV | | | |

# Hilfsantrieb

*Diese Aufgabe sollte vorzugsweise nach dem Vorlesungskapitel 6.3.1.1. behandelt werden.*

Auch bei der Welle-Nabe-Verbindung in diesem Beispiel wird davon ausgegangen, dass das Torsionsmoment wegen der geringen Verdrehfedersteifigkeit der Schraube nur zwischen Wellenbund und Nabe, nicht aber an der Verschraubung übertragen wird. Zwischen Wellenbund und Nabenstirnseite darf wegen einer Oberflächenbeschichtung eine Flächenpressung von pzul = 40 N/mm² nicht überschritten werden. Der Reibwert beträgt für sämtliche Reibpaarungen µ = 0,12. Es kann weiterhin angenommen werden, dass das Kopfreibungsmoment so groß ist wie das Gewindemoment beim Anziehen der Schraube.

| 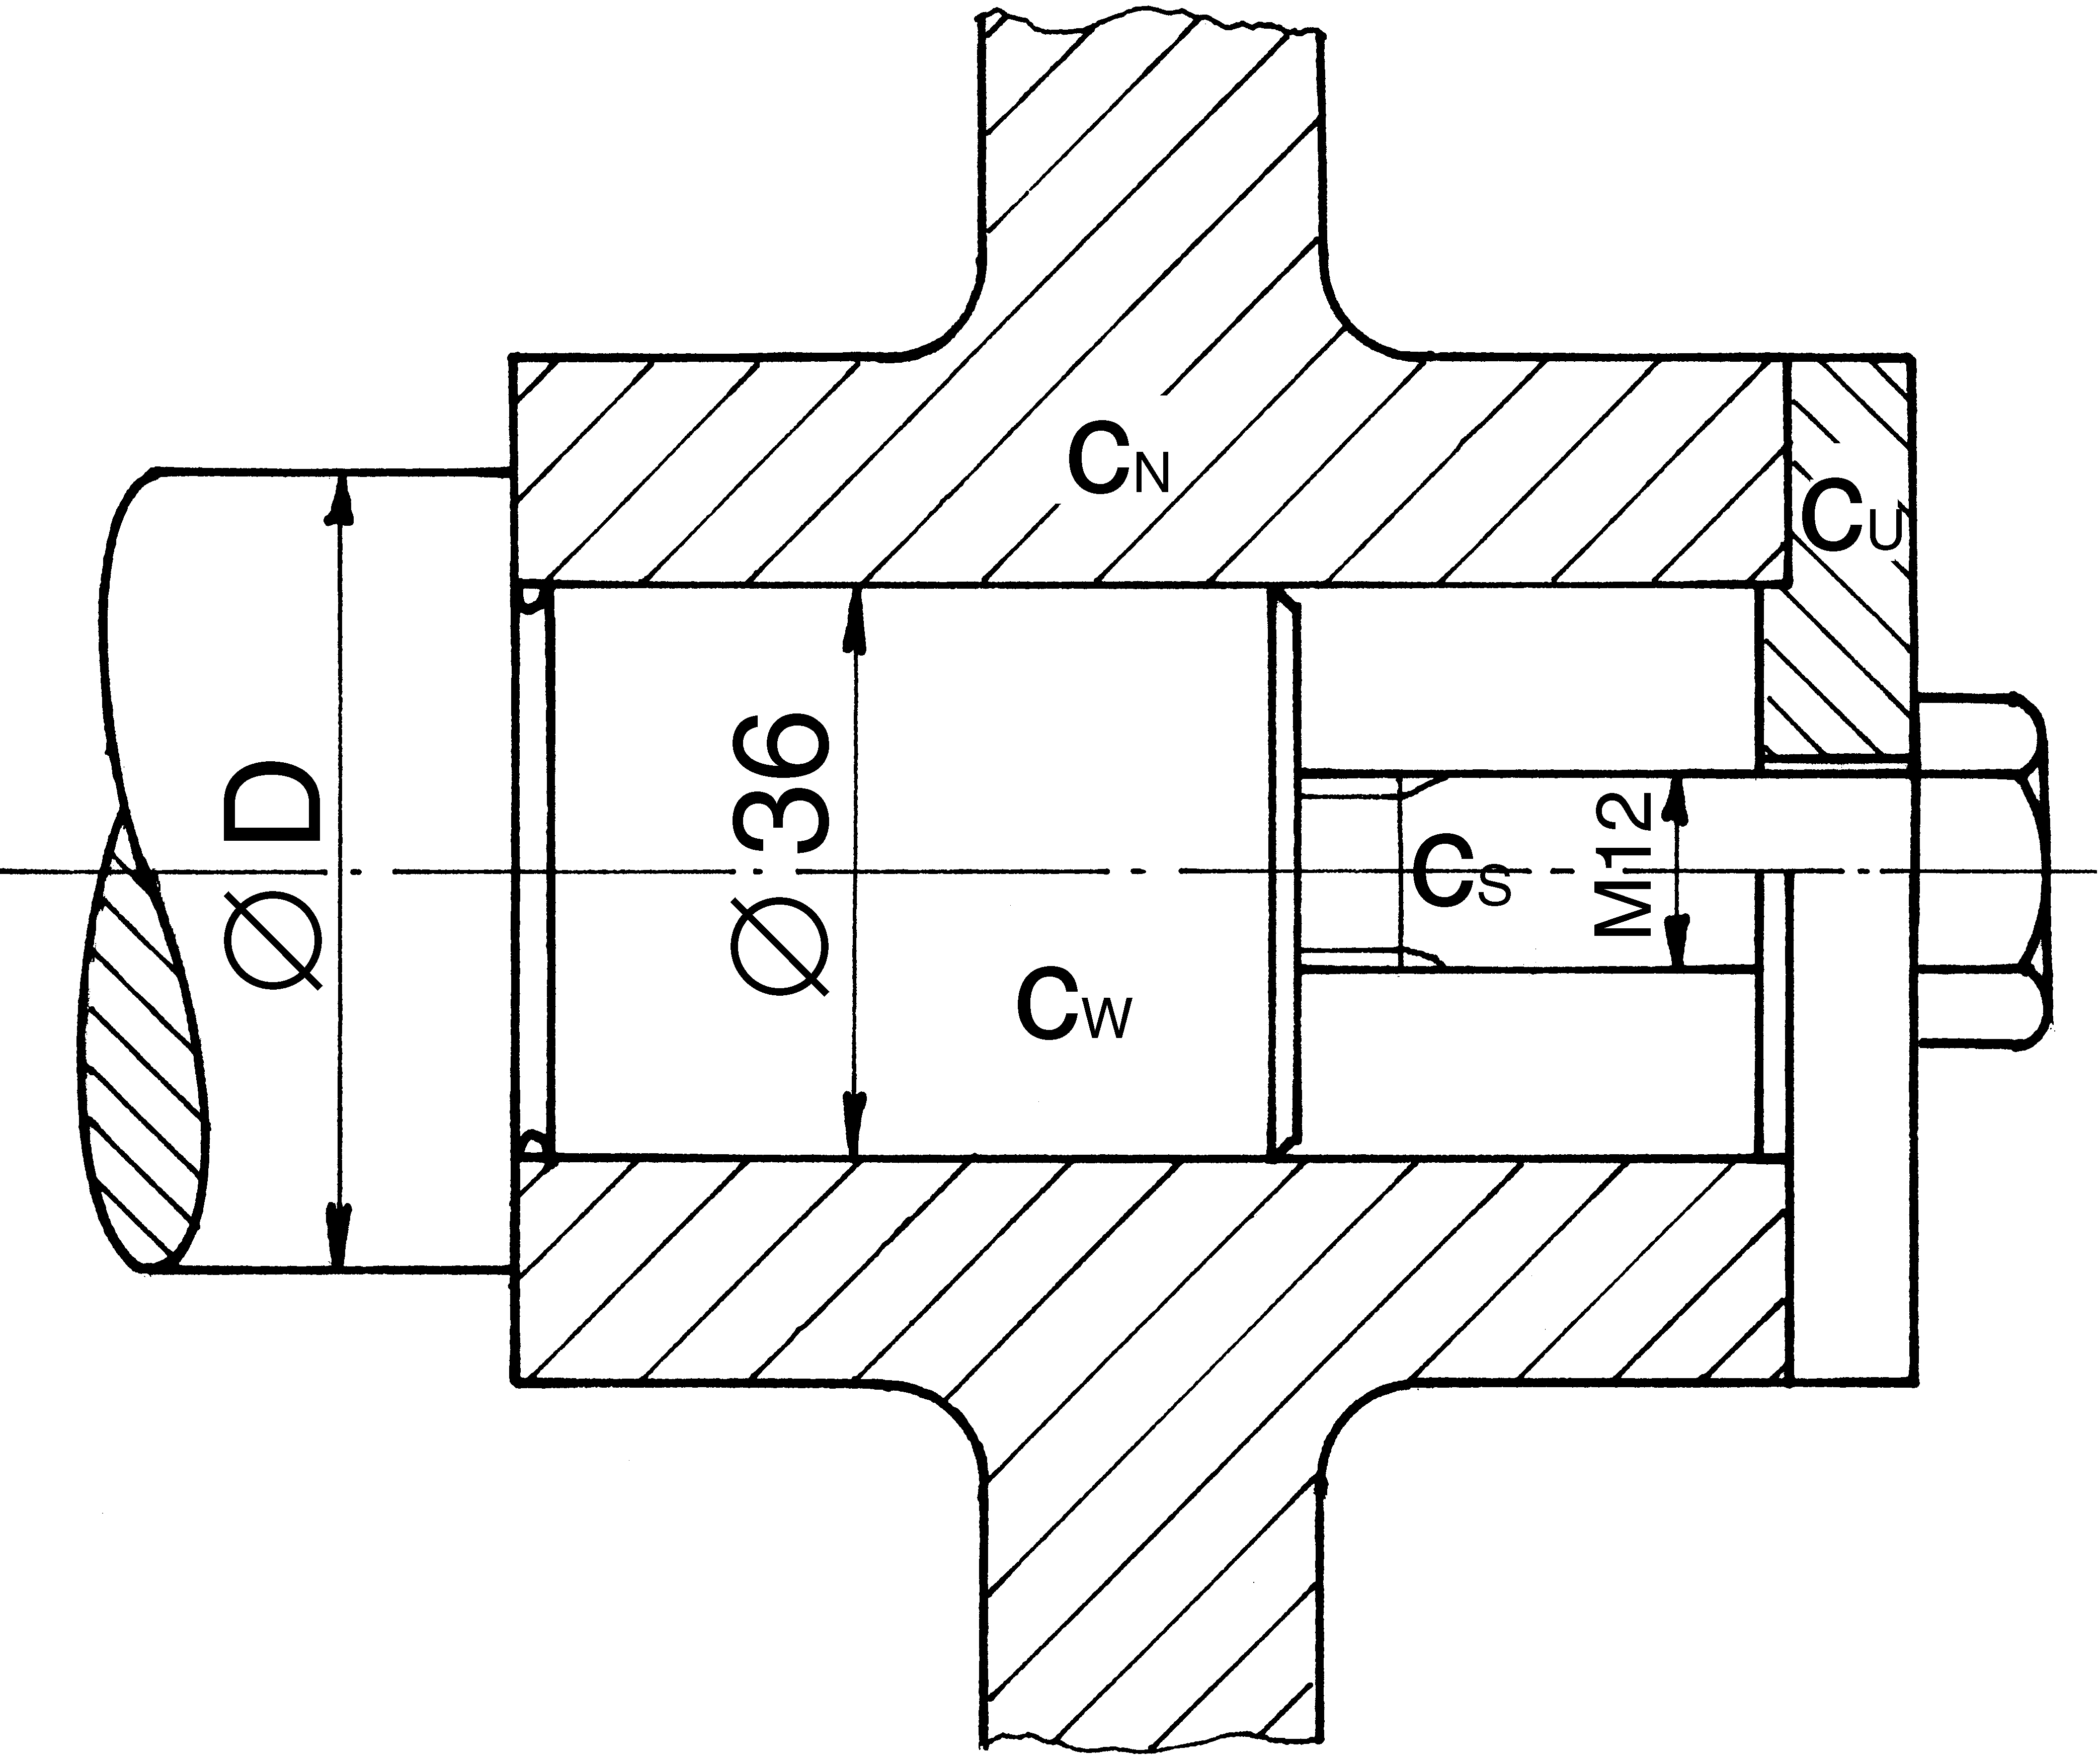 | axiale Steifigkeit der Schraube:  cS = 760 N/µm  axiale Steifigkeit  der Unterlegscheibe:  cU = 360 N/µm  axiale Steifigkeit der Nabe:  cN = 1.956 N/µm  axiale Steifigkeit der Welle:  cW = 4.548 N/µm |
| --- | --- |

a) Die Schraube wird mit einem Gesamtmoment von 60 Nm angezogen. Wie groß ist die Vorspannkraft FVM nach der Montage? Die Setzbeträge der geschlichteten Kontaktflächen sind mit je 8 µm und der des Gewindes mit 5 µm zu berücksichtigen. Wie groß ist die Vorspannkraft FV nach dem Setzen?

|  | FVM [N] = | FV [N] = |
| --- | --- | --- |

b) Wie groß muss der Außendurchmesser der Wellen D mindestens bemessen sein, damit die zulässige Flächenpressung unter keinen Umständen überschritten wird?

|  | D [mm] = |
| --- | --- |

c) Welches maximale Torsionsmoment MoN kann mit dieser Welle-Nabe-Verbindung langfristig übertragen werden, wenn die Schraube nicht nachgezogen wird? Welches maximale Torsionsmoment MmN kann übertragen werden, wenn die Schraube nachgezogen wird?

|  | MoN [Nm] = | MmN [Nm] = |
| --- | --- | --- |

d) Beim Nachziehen der Schraube kann das Schraubenanzugsmoment durch Festhalten der Welle abgestützt werden. Ist es auch möglich, durch Festhalten der Nabe nachzuziehen?

# Radialer Klemmverband, Variation der Ansätze II

*Diese Aufgabe sollte vorzugsweise nach dem Vorlesungskapitel 6.3.1.2. behandelt werden.*

Die unten dargestellte nicht-schaltbare Kupplung verbindet zwei Wellenenden. Sie setzt sich aus zwei hintereinandergeschalteten radialen Klemmverbindungen zusammen: Das Moment wird von der linken Welle wird auf die linke Kupplungsnabe übertragen, von dort auf die rechte Kupplungsnabe übergeleitet und schließlich auf die rechte Welle abgestützt. Wesentlicher Bestandteil der Kupplung sind zwei identische, hintereinander geschaltete Wellen-Nabe-Verbindungen als radialer Klemmverband.

In einer gegenüberstellenden Betrachtung wird die Kupplung sowohl mit biegesteifer als auch mit biegeweicher Nabe ausgeführt. Zwischen Welle und Nabe liegt ein Reibwert µ = 0,08 vor.


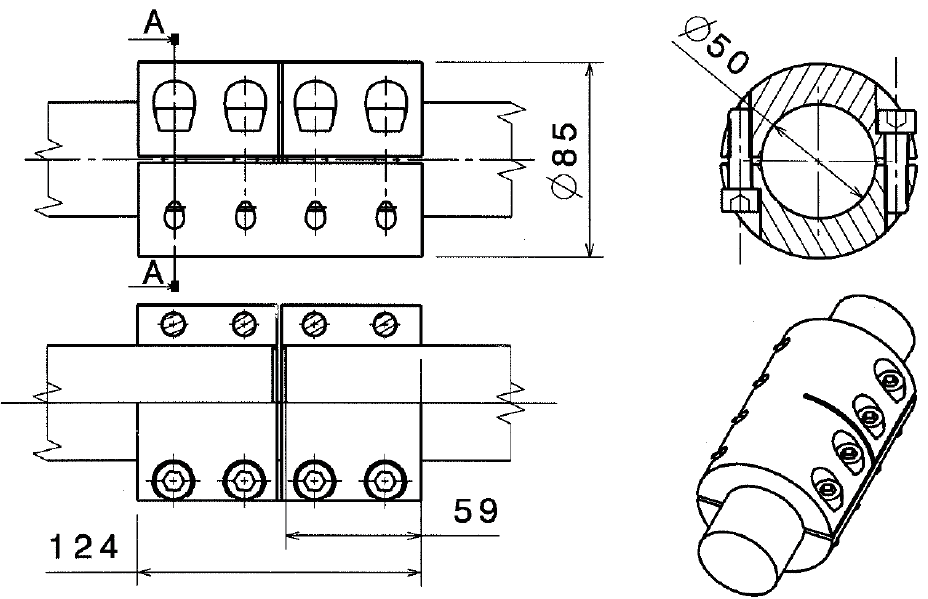


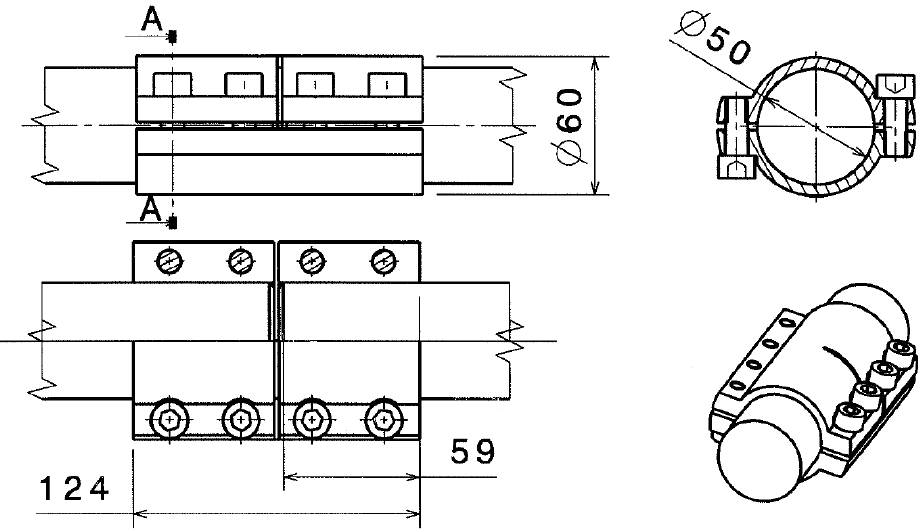


Die folgenden Berechnungen sind sowohl für die Annahme „biegesteife Nabe“ als auch für „biegeweiche Nabe“ anzustellen. Zur Dokumentation der Ergebnisse bedienen Sie sich der untenstehenden Schemata.

a. Dimensionierung nach der **zulässigen Pressung**:

Es wird die Werkstoffpaarung verwendet, die eine Flächenpressung zwischen Welle und Nabe von pzul = 130 N/mm² zulässt. Welches Torsionsmoment Mt ist dann übertragbar und mit welcher Vorspannkraft FV muss die einzelne Schraube dann angezogen werden?

|  |  | Annahme  „biegesteife Nabe“ | Annahme  „biegeweiche Nabe“ |
| --- | --- | --- | --- |
|  | pmax = pzul [N/mm²] | 130 | 130 |
|  | Mt [Nm] |  |  |
|  | FV [kN] |  |  |

b. Dimensionierung nach dem zu **übertragenden Moment**:

Es soll ein Torsionsmoment von Mt = 1 000 Nm übertragen werden. Mit welcher Vorspannkraft FV müssen dann die Schrauben angezogen werden? Wie groß ist in diesem Fall die tatsächlich auftretende maximale Pressung pmax?

|  |  | Annahme  „biegesteife Nabe“ | Annahme  „biegeweiche Nabe“ |
| --- | --- | --- | --- |
|  | pmax [N/mm²] |  |  |
|  | Mt [Nm] | 1 000 | 1 000 |
|  | FV [kN] |  |  |

c. Dimensionierung nach dem zu **maximalen Schraubenvorspannkraft**:

Die Vorspannkraft FV der einzelnen Schraube ist auf 44 kN begrenzt. Wie groß ist in diesem Fall die tatsächlich auftretende maximale Pressung pmax? Welches Torsionsmoment Mt kann dann übertragen werden?

|  |  | Annahme  „biegesteife Nabe“ | Annahme  „biegeweiche Nabe“ |
| --- | --- | --- | --- |
|  | pmax [N/mm²] |  |  |
|  | Mt [Nm] |  |  |
|  | FV = FVmax [kN] | 44 | 44 |
