# Supplementary material
Source: publisher site journal article supplement (https://www.degruyterbrill.com/publication/isbn/9783110692143/downloadAsset/9783110692143_Zusatzmaterial_Basiswissen.zip)
Supplement: Supplementary file 14 [file Basiswissen, Zusatzaufgaben Kapitel 6, Lösungen.doc]

Hochschule Trier, Fachbereich Technik

Prof. Dr.-Ing. Hubert Hinzen

Maschinenelemente Kapitel 6:

Welle-Nabe-Verbindungen

Aufgabensammlung B

Lösungen

Stand: 30.03.2020

Inhalt

[1 Miniflex 2](#__RefHeading___Toc36476941)

[2 Sichelbefestigung Motorrasenmäher 4](#__RefHeading___Toc36476942)

[3 Hilfsantrieb 7](#__RefHeading___Toc36476943)

[4 Radialer Klemmverband, Variation der Ansätze II 8](#__RefHeading___Toc36476944)

# Miniflex

P = Mt * ω →

Mtmax = µ * Fax * rm

MKR = FV * µK * rm =

Mges = MGew + MKR = 13,52 Nmm + 19,07 Nm = 32,59 Nm

| Welches Torsionsmoment ist zu übertragen? | | Mt | Nmm | 19,10 |
| --- | --- | --- | --- | --- |
| Welcher Hebelarm ist für die Momentenübertragung zwischen Werkzeug und Flansch maßgebend? | | rm | mm | 1,80 |
| Welche Axialkraft muss für die Momentenübertragung zwischen Werkzeug und Flansch aufgebracht werden? | | Fax | N | 88,3 |
| Welche Flächenpressung entsteht zwischen Werkzeug und Flansch? | | p | N/mm² | 5,05 |
| Welches Gewindemoment muss durch an der Schraube aufgebracht werden, um den Reibschluss des axialen Klemmverbandes sicher zu stellen? | | MGew | Nmm | 13,52 |
| Mit welchem Gesamtmoment muss angezogen werden? | | Mges | Nmm | 32,59 |
| Das Anzugsmoment der Schraube wird durch Arretieren des Werkzeugschafts abgestützt. Ist es auch möglich, das Moment durch Blockieren der Trennscheibe (also noch vor dem Einführen des Werkzeugschafts in das Spannzeug der Bohrmaschine) abzustützen? Begründen Sie Ihre Aussage durch Ankreuzen. | X ja  O nein  weil X MGewinde < MFlansch-Schleifscheibe  weil O MGewinde ≥ MFlansch-Schleifscheibe | | | |

Ist MGew größer oder kleiner als MFlansch-Schleifscheibe?

Zwischen Flansch und Trennscheibe kann mehr Moment abgestützt werden als im Gewinde übertragen wird. Deshalb ist eine Montage durch Blockieren der Trennscheibe möglich.

# Sichelbefestigung Motorrasenmäher

P = Mt * ω →

Mtmax = µ * Fax * rm

MKR = FV * µK * rK =

Mges = MGew + MKR = 11,99 Nm + 13,53 Nm = 25,52 Nm

V =  zul = 640 N/mm² (für Schraubengüte 8.8)

→

V =

das Gewindemoment kann 1,709-fach überhöht werden

Das Gesamtmoment kann ebenfalls um den Faktor 1,709 überhöht werden:

Mgesmax = Mges * 1,709 = 25,52 Nm * 1,709 = 43,61 Nm

| Welches Torsionsmoment ist zu übertragen? | | Mt | Nm | 10,23 |
| --- | --- | --- | --- | --- |
| Welcher Hebelarm ist für die Momentenübertragung zwischen Welle und Sichel maßgebend? | | rm | mm | 7,43 |
| Welche Axialkraft muss für die Momentenübertragung aufgebracht werden? | | Fax | N | 17.210 |
| Welche Flächenpressung stelle sich zwischen Sichel und Well ein? | | p |  | 65,2 |
| Welches Gewindemoment muss durch an der Schraube aufgebracht werden, um den Reibschluss am axialen Klemmverbänden sicher zu stellen? | | MGew | Nm | 11,99 |
| Welches Kopfreibungsmoment entsteht zwischen Schraube und Messer? | | MKR | Nm | 13,53 |
| Mit welchem Gesamtmoment muss mindestens angezogen werden, um den Reibschluss der Welle-Nabe-Verbindung sicher zu stellen? | | Mges | Nm | 25,52 |
| Mit welchem Gesamtmoment darf unter Berücksichtigung der Schraubenfestigkeit höchstens angezogen werden? | | Mgesmax | Nm | 43,61 |
| Das Anzugsmoment der Schraube wird mit einem Schraubschlüssel an der Welle abgestützt. Ist es auch möglich, das Moment ohne Schraubschlüssel durch Blockieren des Messers abzustützen? Begründen Sie Ihre Aussage durch Ankreuzen. |  nein  O ja  weil O Mgesanz ≥ MWNV  weil  MGew ≥ MWNV  weil O MKopfreibung ≥ MWNV  weil O Mgesanz < MWNV  weil O MGew < MWNV  weil O MKopfreibung < MWNV | | | |

# Hilfsantrieb

1. Gl. 4.12

Faktor 2, weil MGew = MKR

Gl. 4.11

Setzbetrag geschlichtete Oberfläche: 3 * 8 µm = 24 µm

Setzbetrag Gewinde: 5 µm

Gesamtsetzbetrag fV = 29 µm

 Verlust an Vorspannkraft: FV = cges * fV

cges = 207 N/µm

FV = 207 N/µm * 29 µm = 6.011 N

FV = FVM - FV = 28.875 N - 6.011 N = 22.864 N

|  | FVM [N] = 28.875 | FV [N] = 22.864 |
| --- | --- | --- |

b) Schema Bild 6.13, untere Dreieckseite:

|  | D [mm] = 47 |
| --- | --- |

c) Schema Bild 6.13, linke Dreieckseite

ohne Nachziehen: MoN = 22.864N * 20,9 mm * 0,12 = 57,3 Nm

mit Nachziehen: MmN = 28.875N * 20,9 mm * 0,12 = 72,4 Nm

|  | MoN [Nm] = 57,3 | MmN [Nm] = 72,4 |
| --- | --- | --- |

d) ja, weil das Gewindemoment (MGew = 0,5 Mges = 30 Nm) kleiner ist als das Moment, welches durch die Welle-Nabe-Verbindung übertragen werden kann

# Radialer Klemmverband, Variation der Ansätze II

Sämtliche hier benutzten Gleichungen sind in Bild 6.21 zusammengestellt.

1. Dimensionierung nach der **zulässigen Pressung**:

„biegesteife“ Nabe:

Mtmax = 1,57 * L * d² * µ * pzul = 1,57 * 59 mm * (50mm)² * 0,08 * 130 N/mm² = 2 408 Nm

„biegeweiche“ Nabe:

Mtmax = L * d² * µ * pzul = 59 mm * (50mm)² * 0,08 * 130 N/mm² = 1 534 Nm

|  |  | Annahme  „biegesteife Nabe“ | Annahme  „biegeweiche Nabe“ |
| --- | --- | --- | --- |
|  | **pmax = pzul [N/mm²]** | **130** | **130** |
|  | Mt [Nm] | 2 408 | 1 534 |
|  | FV [kN] | 95,9 | 75,2 |

1. Dimensionierung nach dem zu **übertragenden Moment**:

„biegesteife“ Nabe:

„biegeweiche“ Nabe:

|  |  | Annahme  „biegesteife Nabe“ | Annahme  „biegeweiche Nabe“ |
| --- | --- | --- | --- |
|  | pmax [N/mm²] | 54,0 | 84,7 |
|  | **Mt [Nm]** | **1 000** | **1 000** |
|  | FV [kN] | 39,8 | 49,0 |

1. Dimensionierung nach dem zu **maximalen Schraubenvorspannkraft**:

„biegesteife“ Nabe:

Mtmax = 3,14 *µ * d * i * FV = 3,14 * 0,08 * 50mm * 2 * 44kN = 1 105 Nm

„biegeweiche“ Nabe:

Mtmax = 2,55 *µ * d * i * FV = 2,55 * 0,08 * 50mm * 2 * 44kN = 898 Nm

|  |  | Annahme  „biegesteife Nabe“ | Annahme  „biegeweiche Nabe“ |
| --- | --- | --- | --- |
|  | pmax [N/mm²] | 59,7 | 76,1 |
|  | Mt [Nm] | 1 105 | 898 |
|  | **FV = FVmax [kN]** | **44** | **44** |
