# Supplementary material
Source: publisher site journal article supplement (https://www.degruyterbrill.com/publication/isbn/9783110692143/downloadAsset/9783110692143_Zusatzmaterial_Basiswissen.zip)
Supplement: Supplementary file 15 [file Basiswissen, Zusatzaufgaben Kapitel 7, Aufgaben.doc]

Hochschule Trier, Fachbereich Technik

Prof. Dr.-Ing. Hubert Hinzen

Maschinenelemente Kapitel 7

Gleichförmig übersetzende Getriebe

Aufgabensammlung B

Stand: 30.03.2020

Inhalt

[1 Riementrieb, kleinstmöglicher Achsabstand II 2](#__RefHeading___Toc36477665)

[2 Minimaler Scheibendurchmesser eines Riementriebes I 3](#__RefHeading___Toc36477666)

[3 Minimaler Scheibendurchmesser eines Riementriebes II 4](#__RefHeading___Toc36477667)

[4 Brotbackmaschine 5](#__RefHeading___Toc36477668)

[5 Riementrieb mit Auflegevorspannung 7](#__RefHeading___Toc36477669)

[6 Zweistufiges Zahnradgetriebe II 8](#__RefHeading___Toc36477670)

[7 Zweistufiges Zahnradgetriebe IV 9](#__RefHeading___Toc36477671)

[8 Getriebe mit zwei Übersetzungsverhältnissen II 11](#__RefHeading___Toc36477672)

[8.1 Geometrie der Verzahnung 11](#__RefHeading___Toc36477673)

[8.2 Zahnradfestigkeit 11](#__RefHeading___Toc36477674)

[9 Getriebewelle Reibrad – Zahnrad 12](#__RefHeading___Toc36477675)

[9.1 Festigkeit der Welle 13](#__RefHeading___Toc36477676)

[9.2 Reibrad 14](#__RefHeading___Toc36477677)

[9.3 Welle-Nabe-Verbindung 14](#__RefHeading___Toc36477678)

[9.4 Zahnrad 15](#__RefHeading___Toc36477679)

[9.5 Lagerung 15](#__RefHeading___Toc36477680)

# Riementrieb, kleinstmöglicher Achsabstand II

*Diese Aufgabe sollte vorzugsweise nach dem Vorlesungskapitel 7.3.4.2. behandelt werden.*

Ein Flachriementrieb überträgt 3,2 kW bei einer Antriebsdrehzahl von 1.480 min-1 und einem Übersetzungsverhältnis von 1:3,8 ins Langsame. Der Riementrieb soll einen möglichst kleinen Achsabstand aufweisen. Der Riemen ist 2 mm dick und 24 mm breit, darf bis 24 N/mm² belastet werden und weist gegenüber den Scheiben einen Reibwert von µ = 0,7 auf. Biege- und Fliehkrafteinflüsse bleiben unberücksichtigt.

Wie groß müssen die Scheibendurchmesser mindestens sein, wenn der Riemen weder überlastet werden darf noch durchrutschen darf? Tragen Sie im folgenden Schema die wesentlichen Kenngrößen des Riementriebs ein.

| M1 | Nm |  |
| --- | --- | --- |
| M2 | Nm |  |
| SZ | N |  |
| β | ° |  |
|  | ° |  |
| eµ | - |  |
| SL | N |  |
| U | N |  |
| d1 | mm |  |
| d2 | mm |  |
| a | mm |  |

# Minimaler Scheibendurchmesser eines Riementriebes I

*Diese Aufgabe sollte vorzugsweise nach dem Vorlesungskapitel 7.3.4.2. behandelt werden.*

Ein Flachriementrieb soll bei einem Übersetzungsverhältnis von 1:2 ins Langsame ein Antriebsmoment von 120 Nm übertragen und wird so vorgespannt, daß sowohl die Rutschgrenze als auch die Festigkeitsgrenze optimal ausgenutzt wird. Der Riemen ist 3 mm dick, 15 mm breit und darf maximal mit 20 N/mm² belastet werden. Sein Reibwert gegenüber der Scheibe beträgt µ = 0,7. Der Achsabstand ist so groß sein wie der Durchmesser der großen Riemenscheibe.

Welchen Durchmesser müssen die Scheiben mindestens aufweisen? Berechnen Sie zweckmäßigerweise zunächst eµ, die Zugtrumkraft SZ, die Leertrumkraft SL und die Umfangskraft U.

| SZ | N |  |
| --- | --- | --- |
| β | ° |  |
|  | ° |  |
| eµ | - |  |
| SL | N |  |
| U | N |  |
| d1min | mm |  |
| d2min | mm |  |

# Minimaler Scheibendurchmesser eines Riementriebes II

*Diese Aufgabe sollte vorzugsweise nach dem Vorlesungskapitel 7.3.4.2. behandelt werden.*

Ein Flachriementrieb soll bei einem Übersetzungsverhältnis von 1:1 ein Moment von 252 Nm übertragen und wird so vorgespannt, daß sowohl die Rutschgrenze als auch die Festigkeitsgrenze optimal ausgenutzt wird. Der Riemen ist 3 mm dick, 20 mm breit und darf maximal mit 25 N/mm² belastet werden.

Welchen Durchmesser müssen die Scheiben mindestens aufweisen, wenn drei verschiedene Riemen mit gleicher Festigkeit, aber unterschiedlichen Reibwerten zur Verfügung stehen? Berechnen Sie zweckmäßigerweise zunächst eµ, die Zugtrumkraft SZ, die Leertrumkraft SL und die Umfangskraft U.

|  |  | µ = 0,5 | µ = 0,6 | µ = 0,7 |
| --- | --- | --- | --- | --- |
| eµ | - |  |  |  |
| SZ | N |  |  |  |
| SL | N |  |  |  |
| U | N |  |  |  |
| dmin | mm |  |  |  |

# Brotbackmaschine

*Diese Aufgabe sollte vorzugsweise nach dem Vorlesungskapitel 7.3.4.4. behandelt werden.*

Kernstück einer Haushaltsbrotbackmaschine ist ein quaderförmigen Behälter, in dem die Zutaten gemischt, geknetet und gebacken werden. Während des Misch- und Knetvorganges führt ein sog. „Knethaken“ im Backbehälter eine rotierende Rührbewegung aus. Die Welle des Knethakens wird durch den Boden des Behälter heraus geführt und mit einer großen Riemenscheibe bestückt (links im Bild). Der rechts angeordnete Elektromotor treibt über die kleine Riemenscheibe an.


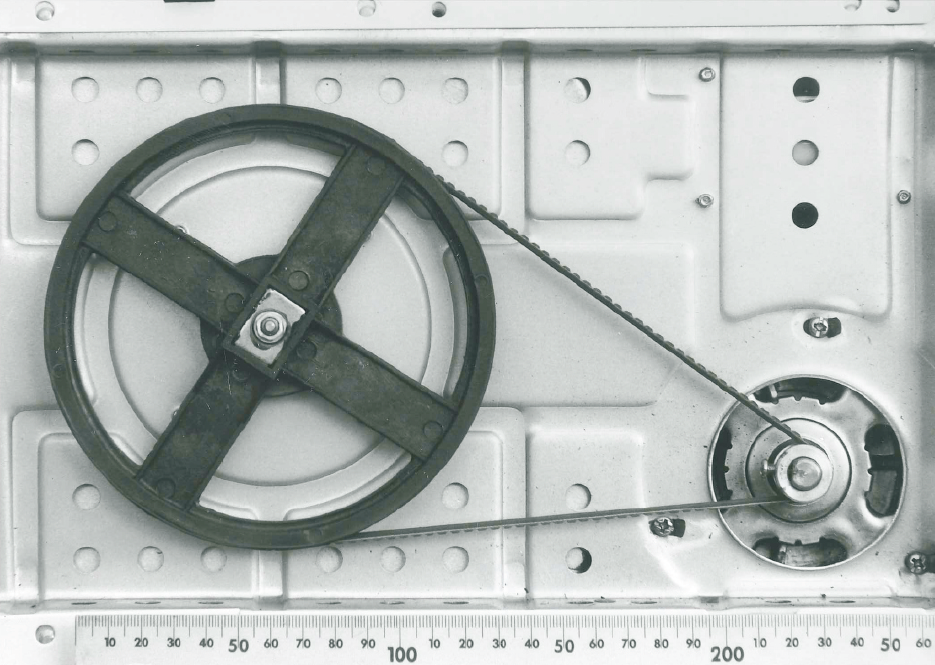


Am unteren Rand des Bild ist ein Maßstab mit aufgenommen worden, so dass die für die Berechnung notwendigen Maße aus dem Bild entnommen werden können.

1. Ermitteln Sie zunächst zeichnerisch die Scheibendurchmesser und den Achsabstand und berechnen Sie den Umschlingungswinkel.
2. Welches Moment kann auf die Welle des Knethakens übertragen werden, wenn der Reibwert zwischen Riemen und Scheibe mit 0,6 angenommen werden kann und im Zugtrum eine Kraft von 150 N vorliegt?
3. Der Antriebsmotor ist mit drei in Langlöchern geführte Schrauben im Bodenblech der Maschine angeflanscht. Der Riementrieb wird durch Parallelverschiebung der Motorwelle vorgespannt. Der Riemen ist 2,8 mm dick, 6 mm breit und weist einen statischen E-Modul von 620 N/mm² auf. Berechnen Sie die Riemenlänge. Um welchen Betrag a muß der Achsabstand vergrößert werden, damit das oben ermittelte maximale Torsionsmoment übertragen werden kann?

| a | d1 | mm |  |
| --- | --- | --- | --- |
|  | d2 | mm |  |
|  | a | mm |  |
|  |  | ° |  |
| b | M2max | Nmm |  |
| c | LRiemen | mm |  |
|  | a | mm |  |

# Riementrieb mit Auflegevorspannung

*Diese Aufgabe sollte vorzugsweise nach dem Vorlesungskapitel 7.3.4.4. behandelt werden.*

Gegeben ist ein Riementrieb mit dem Achsabstand a = 550 mm und dem Übersetzungsverhältnis 1:3 ins Langsame. Der Durchmesser der Scheibe am Abtrieb ist 420 mm. Der Reibwert zwischen Riemen und Scheibe beträgt µ = 0,4. Es soll eine Leistung von 8 kW bei einer Antriebsdrehzahl von 1500 min-1 übertragen werden.

| Wie groß ist die Umfangskraft? | U | N |  |
| --- | --- | --- | --- |
| Wie groß sind die Zugtrumkraft und die Leertrumkraft für den Fall, dass der Riementrieb an der Rutschgrenze betrieben wird? | SZ  SL | N  N |  |
| Die Riemenstärke beträgt 3 mm. Wie breit muss der Riemen sein, damit die für den Riemen zulässige Zugspannung von 15 N/mm² nicht überschritten wird? (Biege- und Fliehkrafteinflüsse können vernachlässigt werden). | b | mm |  |
| Welche Vorspannkraft muss in den Riemen eingeleitet werden, damit er nicht durchrutscht? | SV | N |  |
| Der Elastizitätsmodul des Riemens bezüglich Zug beträgt Estat = 650 N/mm². Um welchen Betrag muss der Achsabstand vergrößert werden, damit die erforderliche Riemenvorspannung erreicht wird? | a | mm |  |
| Wie groß ist dann die Kraft auf die Welle? | FWelle | N |  |
| Es sollen nunmehr nur noch 5 kW Leistung übertragen werden. Auf welchen Betrag kann dann die Vorspannkraft im Riemen zurückgenommen werden, so dass gerade kein Rutschen auftritt? Wie groß ist dann die Zugspannung im Riemen? Um welchen Betrag muss dann der Achsabstand vergrößert werden, damit die erforderliche Riemenvorspannung erreicht wird? | SV  σRiemen  a | N  N/mm²  mm |  |

# Zweistufiges Zahnradgetriebe II

*Diese Aufgabe sollte vorzugsweise nach dem Vorlesungskapitel 7.5.2.12. behandelt werden.*

| 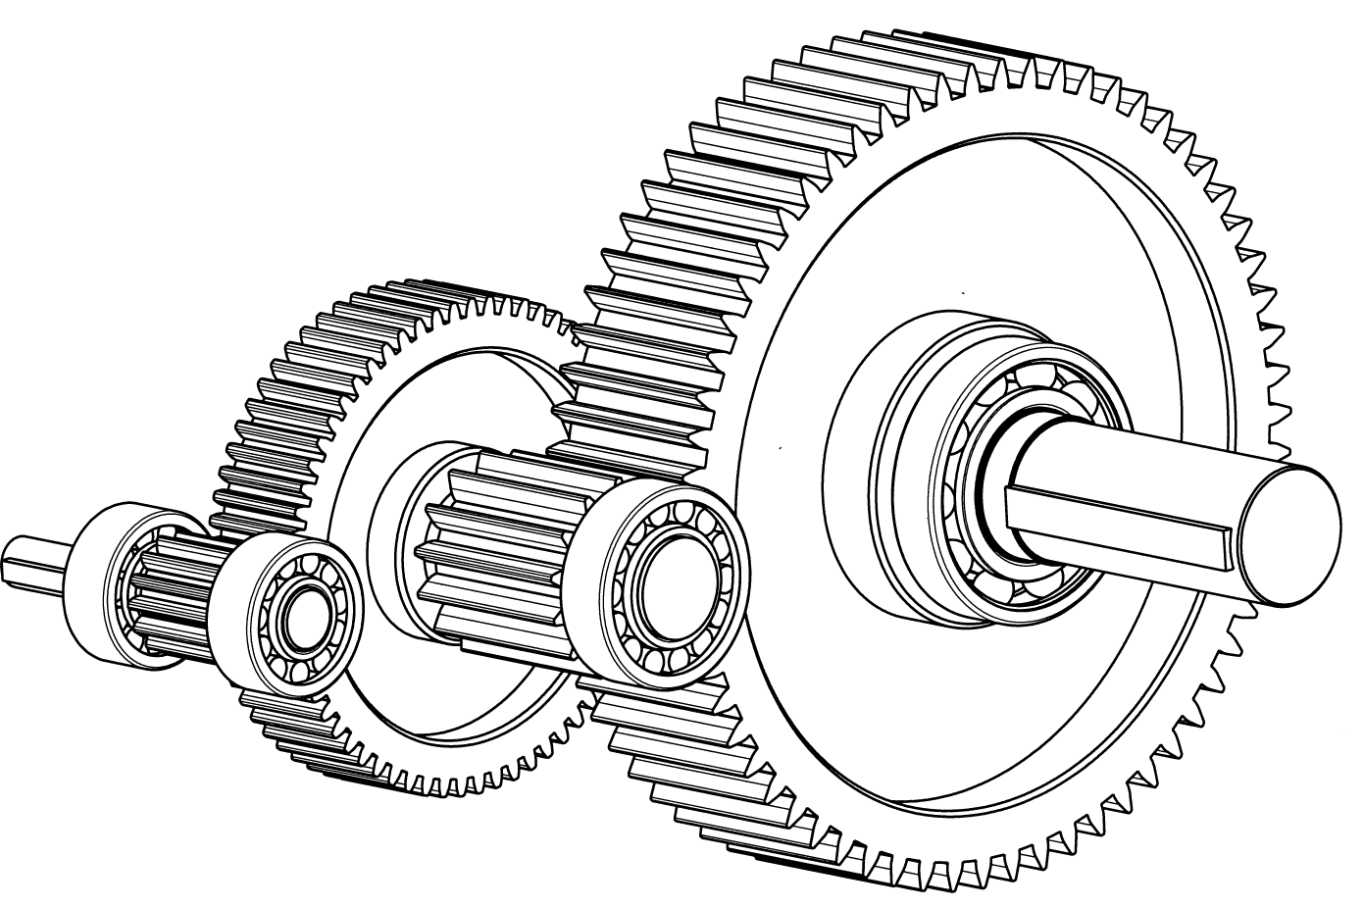 | Ein zweistufiges Zahnradgetriebe soll eine Leistung von 52 kW von einer Eingangsdrehzahl von 2.200 min-1 auf eine Ausgangsdrehzahl von 110 min-1 reduzieren. Das Gesamtübersetzungsverhältnis ist auf zwei gleiche Einzelübersetzungsverhältnisse aufzuteilen. Die Verzahnung ist mit dem normgerechten Eingriffswinkel von 20° ohne Profilverschiebung auszuführen, so dass eine Mindestzähnezahl 14 zu berücksichtigen ist. |
| --- | --- |

Die Zahnbreite soll fünfzehnmal so groß sein wie der Modul. Es kann angenommen werden, dass das Produkt der Faktoren YF*Y*YS*KA*KV*KF*KF = 4,4 beträgt.

- Berechnen Sie zunächst die beiden Einzelübersetzungsverhältnisse und die Zähnezahlen!
- Ermitteln Sie die Geometrie der Verzahnung für beide Stufen: Wälzkreise, Grundkreise, Achsabstände, Kopfkreise, Überdeckungsgrade
- Wie hoch ist die Zahnfußspannung in beiden Stufen?

|  |  | |  | Eingangsstufe | | Endstufe | |
| --- | --- | --- | --- | --- | --- | --- | --- |
|  |  | |  | Ritzel  Antriebs-welle | Großrad  Zwischen-welle | Ritzel  Zwischen-welle | Großrad  Abtriebs-welle |
| Modul | | m | mm | 3 | | 5 | |
| Zahnbreite | | b | mm | 45 | | 75 | |
| Übersetzungsverhältnis | | i | - |  | |  | |
| Zähnezahl | | z | - | 14 |  | 14 |  |
| Teilung | | p | mm |  | |  | |
| Wälzkreisdurchmesser | | d | mm |  |  |  |  |
| Grundkreisdurchmesser | | db | mm |  |  |  |  |
| Achsabstand | | a | mm |  | |  | |
| Kopfkreisdurchmesser | | da | mm |  |  |  |  |
| Überdeckungsgrad | | εα | - |  | |  | |
| Zahnfußspannung | | σF | N/mm² |  | |  | |

# Zweistufiges Zahnradgetriebe IV

*Diese Aufgabe sollte vorzugsweise nach dem Vorlesungskapitel 7.5.2.12. behandelt werden.*

| 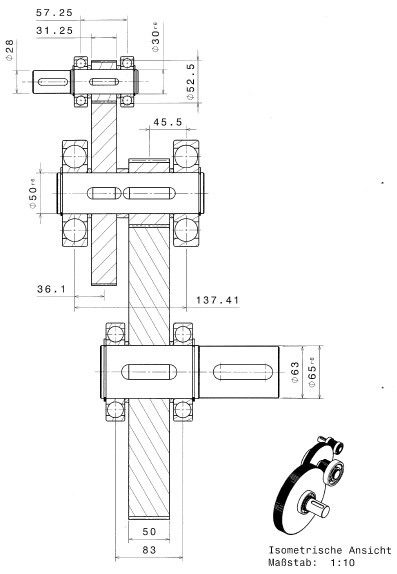 | Ein zweistufiges Zahnradgetriebe soll eine Leistung von 50 kW von einer Eingangsdrehzahl von 3.000 min-1 auf eine Ausgangsdrehzahl von 150 min-1 reduzieren. Das Gesamtübersetzungsverhältnis ist auf zwei gleiche Einzelübersetzungsverhältnisse aufzuteilen. Die Verzahnung ist mit dem normgerechten Eingriffswinkel von 20° ohne Profilverschiebung auszuführen, die Mindestzähnezahl soll 17 betragen und es sind die unten aufgeführten Module zu verwenden. Es kann angenommen werden, dass das Produkt der Faktoren YF*Y*YS*KA*KV*KF*KF = 4,4 beträgt.   - Berechnen Sie zunächst die beiden Einzelübersetzungsverhältnisse und die Zähnezahlen der Großräder! - Ermitteln Sie die Geometrie der Verzahnung für beide Stufen: Wälzkreise, Grundkreise, Achsabstände, Kopfkreise, Überdeckungsgrade - Wie hoch ist die Zahnfußspannung in beiden Stufen? |
| --- | --- |

|  |  | |  | Eingangsstufe | | Endstufe | |
| --- | --- | --- | --- | --- | --- | --- | --- |
|  |  | |  | Ritzel  Antriebs-welle | Großrad  Zwischen-welle | Ritzel  Zwischen-welle | Großrad  Abtriebs-welle |
| Modul | | m | mm | 2,5 | | 4 | |
| Übersetzungsverhältnis | | i | - |  | |  | |
| Zähnezahl | | z | - | 17 |  | 17 |  |
| Teilung | | p | mm |  | |  | |
| Wälzkreisdurchmesser | | d | mm |  |  |  |  |
| Grundkreisdurchmesser | | db | mm |  |  |  |  |
| Achsabstand | | a | mm |  | |  | |
| Kopfkreisdurchmesser | | da | mm |  |  |  |  |
| Überdeckungsgrad | | εα | - |  | |  | |
| Tangentialkraft | | Ft | N |  | |  | |
| Zahnfußspannung | | σF | N/mm² |  | |  | |

# Getriebe mit zwei Übersetzungsverhältnissen II

*Diese Aufgabe sollte vorzugsweise nach dem Vorlesungskapitel 7.5.2.12. behandelt werden.*

Das nachfolgend skizzierte Getriebe besteht aus einer oberen Antriebswelle mit einer Drehzahl von 2.050 min-1 und einer unteren Abtriebswelle.

| 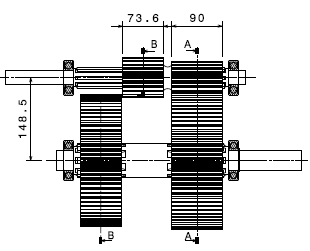 | In der dargestellten Stellung ist das rechte Zahnradpaar im Eingriff und das Getriebe überträgt 1:4,5. Werden die beiden Zahnräder auf der Antriebswelle gemeinsam auf ihrer längsverschiebbaren Welle-Nabe-Verbindung nach links verschoben, so wird das rechte Zahnradpaar außer Eingriff gesetzt und das linke Zahnradpaar kommt in Eingriff, welches dann 1:3,5 untersetzt. Beide Zahnradpaare sind mit dem Modul m = 3 mm ausgeführt. Das kleinste Rad hat 18 Zähne. Sämtliche Zahnräder werden ohne Profilverschiebung ausgeführt. |
| --- | --- |

## Geometrie der Verzahnung

Bestimmen Sie die Zähnezahlen und die weiteren nach untenstehendem Schema aufgeführten geometrischen Kenngrößen der Verzahnung. Die geforderten Übersetzungsverhältnisse sind möglichst genau einzuhalten.

|  |  |  | Rad oben links | Rad unten links | Rad oben rechts | Rad unten rechts |
| --- | --- | --- | --- | --- | --- | --- |
| Zähnezahl | z | - |  |  |  |  |
| Wälzkreisdurchmesser | d | mm |  |  |  |  |
| Grundkreisdurchmesser | db | mm |  |  |  |  |
| Kopfkreisdurchmesser | da | mm |  |  |  |  |
| Profilüberdeckung | ɛ | - |  | |  | |
| Achsabstand | a | mm |  | | | |

## Zahnradfestigkeit

Es kann eine Zahnfußspannung von 400 N/mm² zugelassen werden und es kann angenommen werden, dass das Produkt der Faktoren YF*Y*YS*KA*KV*KF*KF = 4,4 beträgt. Welches Antriebsmoment und welche Leistung kann dann übertragen werden?

|  |  | linkes Zahnradpaar | rechtes Zahnradpaar |
| --- | --- | --- | --- |
| Antriebsmoment | Nm |  |  |
| Leistung | kW |  |  |

# Getriebewelle Reibrad – Zahnrad

*Diese Aufgabe sollte vorzugsweise nach dem Vorlesungskapitel 7.5.2.12. behandelt werden.*

Die unten dargestellte Getriebewelle überträgt eine Leistung von 12 kW bei einer Drehzahl von 1.500 min-1 übertragen. Die Torsion wird am fliegend gelagerten Reibrad von einem weiteren, hier nicht dargestellten Reibrad mit der Reibzahl µ = 0,45 eingeleitet und am beidseitig gelagerten Zahnrad abgenommen.


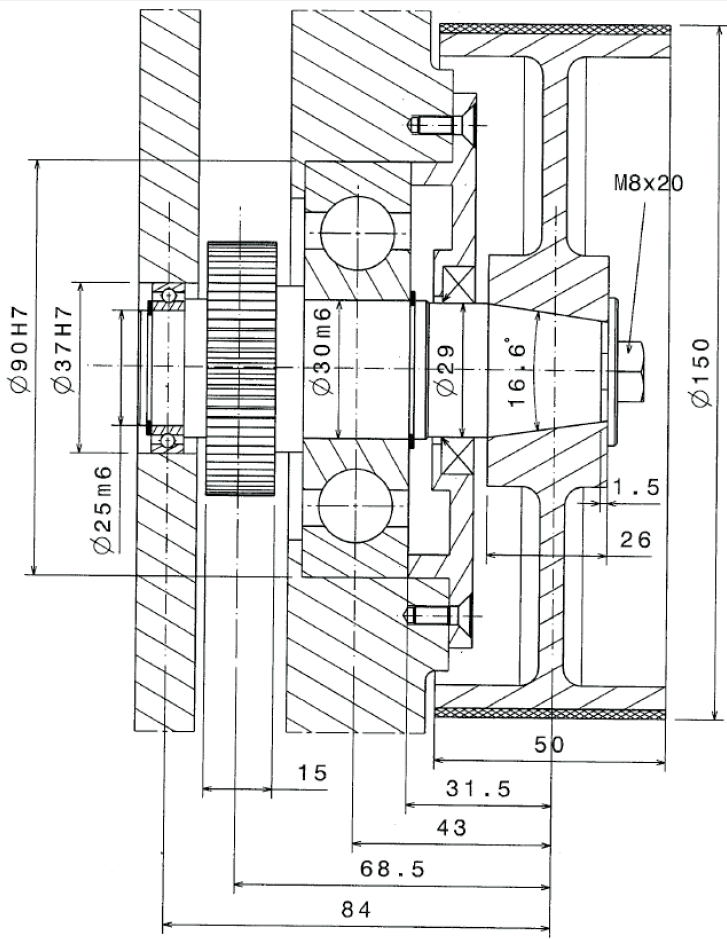


## Festigkeit der Welle

Nach den Gesetzmäßigkeiten der Mechanik ist die größte Wellenbelastung am rechten Lager zu erwarten. Am Seegerringeinstich rechts neben dem Lager ist der Restquerschnitt besonders gering und die Kerbwirkung besonders hoch. An dieser Stelle ist die Vergleichsspannung zu ermitteln. Zur Dokumentierung Ihrer Ergebnisse benutzen Sie bitte folgendes Schema:

|  | statisch | dynamisch |
| --- | --- | --- |
| L [N] = | ZDstat [N/mm²] = | ZDdyn [N/mm²] = |
| Q [N] = | Qstat [N/mm²] = | Qdyn [N/mm²] = |
| Mb [Nm] = | bstat [N/mm²] = | bdyn [N/mm²] = |
| Mt [Nm] = | tstat [N/mm²] = | tdyn [N/mm²] = |
|  | vstat [N/mm²] = | vdyn [N/mm²] = |

## Reibrad

Die Reibradpaarung ist mit organischem Reibwerkstoff ausgestattet und wird trocken betrieben. Das hier nicht dargestellte Gegenrad weist einen Durchmesser von 50 mm auf.

| Wie groß ist der Ersatzkrümmungsdurchmesser? | mm |  |
| --- | --- | --- |
| Wie hoch ist die Wälzpressung? | N/mm² |  |

## Welle-Nabe-Verbindung

Die Welle-Nabe-Verbindung des Reibrades ist als Kegelpreßverband mit einem Reibwert von µ = 0,1 ausgeführt.

| Wie groß ist der für die Momentenübertragung maßgebende mittlere Wellendurchmesser? | dm | mm |  |
| --- | --- | --- | --- |
| Wie groß ist die erforderliche Vorspannkraft der Schraube? | FV | N |  |
| Wie groß ist die Flächenpressung am Kegelmantel? | p | N/mm² |  |

## Zahnrad

Das hier dargestellte, antreibende Zahnrad ist mit 20 Zähnen ausgestattet. Das Zahnradpaar untersetzt 1:3 ins Langsame. Die normgerechte Evolventenverzahnung mit Modul 2,5 mm wird ohne Profilverschiebung ausgeführt. Die Fußausrundung beträgt 25% des Moduls. Klären Sie zunächst die Geometrie der Verzahnung, in dem Sie die unten aufgeführten Kenngrößen ermitteln.

|  |  | Rad 1 | Rad 2 |
| --- | --- | --- | --- |
| Zähnezahl z | - |  |  |
| Grundkreisdurchmesser db | mm |  |  |
| Wälzkreisdurchmesser dw | mm |  |  |
| Kopfkreisdurchmesser da | mm |  |  |
| Fußkreisdurchmesser df | mm |  |  |
| Teilung | mm |  | |
| Achsabstand | mm |  | |
| Profilüberdeckung  | - |  | |

Berechnen Sie die an der Verzahnung wirkenden Kräfte:

| Tangentialkraft | Ft | N |  |
| --- | --- | --- | --- |
| Radialkraft | Fr | N |  |
| Normalkraft | Fn | N |  |

Wie groß ist die Zahnfußspannung F, wenn das Produkt der Faktoren YF*Y*YS*KA*KV*KF*KF = 4,4 beträgt.

| Zahnfußspannung | F | N/mm² |  |
| --- | --- | --- | --- |

## Lagerung

Die Getriebewelle wird mit Wälzlagern gelagert. Das Kugellager an der linken Lagerstelle weist eine dynamische Tragzahl von 4.360 N auf (Typ 61805), das Kugellager an der rechten Lagerstelle verfügt über eine dynamische Tragzahl von 43.600 N (Typ 6406).

Die Welle wird mit der resultierenden Kraft des Reibradgetriebes und der aus der Verzahnung resultierenden Kräften Fn belastet. In diesem Konstruktionsstadium ist noch nicht klar, welche Lage diese beiden Kräfte zueinander einnehmen. Aus diesem Grunde werden die beiden unten aufgeführten Modellfälle betrachtet. Berechnen Sie für beide Fälle sowohl die Lagerlasten als auch die Lebensdauer der Lager:

|  | | Kraftresultierende des Wälzgetriebes und  Kraftresultierende der Verzahnung wirken genau in | | | |
| --- | --- | --- | --- | --- | --- |
|  | | **gleiche** Richtung | | **entgegengesetzte** Richtung | |
|  |  | links | rechts | links | rechts |
| FLager | N |  |  |  |  |
| Lh | h |  |  |  |  |
