# Supplementary material
Source: publisher site journal article supplement (https://www.degruyterbrill.com/publication/isbn/9783110692143/downloadAsset/9783110692143_Zusatzmaterial_Basiswissen.zip)
Supplement: Supplementary file 16 [file Basiswissen, Zusatzaufgaben Kapitel 7, Lösungen.doc]

Hochschule Trier, Fachbereich Technik

Prof. Dr.-Ing. Hubert Hinzen

Basiswissen Maschinenelemente

Kapitel 7: Getriebe

Aufgabensammlung B

Lösungen

Stand: 30.03.2020

Die Hinweisnummern auf Gleichungen, Bilder und Tabellen beziehen sich auf die aktuelle, dritte Auflage von „Basiswissen Maschinenelemente“.

Inhalt

[1 Reibradgetriebe mit Tellerrad 2](#__RefHeading___Toc17702175)

[2 Reibradgetriebe Gummi – Stahl Variation des Übersetzungsverhältnisses 5](#__RefHeading___Toc17702176)

[3 Wälzgetriebe mit Kettenabtrieb 6](#__RefHeading___Toc17702177)

[4 Zweistufiges Reibradgetriebe Stahl – Gummi mit Lagerung und Welle – Nabe - Verbindung 7](#__RefHeading___Toc17702178)

[4.1 Reibradpaarung 7](#__RefHeading___Toc17702179)

[4.2 Lagerung 8](#__RefHeading___Toc17702180)

[4.3 Welle-Nabe-Verbindungen 9](#__RefHeading___Toc17702181)

[5 Zweistufiges Reibradgetriebe Stahl – Gummi mit Lagerung und Dauerfestigkeitsnachweis 12](#__RefHeading___Toc17702182)

[5.1 Reibradpaarung 12](#__RefHeading___Toc17702183)

[5.2 Lagerung 13](#__RefHeading___Toc17702184)

[5.3 Dauerfestigkeitsnachweis der Zwischenwelle 14](#__RefHeading___Toc17702185)

[6 Anpreßkraftregelung bei Teillast 16](#__RefHeading___Toc17702186)

[7 Riementrieb, kleinstmöglicher Achsabstand II 19](#__RefHeading___Toc17702187)

[8 Minimaler Scheibendurchmesser eines Riementriebes I 21](#__RefHeading___Toc17702188)

[9 Minimaler Scheibendurchmesser eines Riementriebes II 22](#__RefHeading___Toc17702189)

[10 Riementrieb mit Vorspannung im Leertrum 23](#__RefHeading___Toc17702190)

[11 Riemenspannung durch Gewicht des Antriebsmotors II 24](#__RefHeading___Toc17702191)

[12 Brotbackmaschine 26](#__RefHeading___Toc17702192)

[13 Riementrieb, Vorspannung durch Achsabstandsänderung II 27](#__RefHeading___Toc17702193)

[13.1 Übertragbare Leistung 27](#__RefHeading___Toc17702194)

[13.2 Vorspannung 27](#__RefHeading___Toc17702195)

[14 Riementrieb mit Auflegevorspannung 28](#__RefHeading___Toc17702196)

[15 Offener Riementrieb unter Biegeeinfluss 30](#__RefHeading___Toc17702197)

[16 Zweistufiges Zahnradgetriebe II 32](#__RefHeading___Toc17702198)

[17 Zweistufiges Zahnradgetriebe IV 34](#__RefHeading___Toc17702199)

[18 Getriebe mit zwei Übersetzungsverhältnissen II 36](#__RefHeading___Toc17702200)

[18.1 Geometrie der Verzahnung 36](#__RefHeading___Toc17702201)

[18.2 Zahnradfestigkeit 37](#__RefHeading___Toc17702202)

[19 Getriebewelle Reibrad – Zahnrad 38](#__RefHeading___Toc17702203)

[19.1 Festigkeit der Welle 38](#__RefHeading___Toc17702204)

[19.2 Reibrad 39](#__RefHeading___Toc17702205)

[19.3 Welle-Nabe-Verbindung 39](#__RefHeading___Toc17702206)

[19.4 Zahnrad 39](#__RefHeading___Toc17702207)

[19.5 Lagerung 40](#__RefHeading___Toc17702208)

[20 Zahnradpaarung mit vorgegebenem Achsabstand 42](#__RefHeading___Toc17702209)

[21 Handrasenmäher 44](#__RefHeading___Toc17702210)

# Riementrieb, kleinstmöglicher Achsabstand II

Gl. 0.63

P = M1 * 1 Gl. 0.62 

M2 = M1 * i = 20,6 Nm * 3,8 = 78,5 Nm Gl. 7.2

Je kleiner der Scheibendurchmesser wird, desto größer werden die Riemenkräfte. Da die Riemenkraft aber durch die Belastbarkeit des Riemens begrenzt ist, kann der Scheibendurchmesser nicht beliebig klein werden, sondern darf einen Wert dmin nicht unterschreiten.

SZ = zul * ARiemen = 24 N/mm² * 2mm * 24mm = 1.152 N Gl. 7.29

Bei dem angestrebten möglichst kurzen Achsabstand müssen die beiden Scheiben so positioniert werden, daß sie fast einander berühren (vgl. Bild 7.20). Damit gewinnt man in Anlehnung an Gl. 7.32 für den Winkel  den folgenden Ausdruck:

d2 = 3,8 * d1

 = 180° - 2 *  = 180° - 2 * 35,7° = 108,6° Gl. 7.31

e = e0,7*1,895 = 3,769 = Gl. 7.23 

U = SZ – SL = 1.152 N – 305,7 N = 846,3 N Gl. 7.26

Gl. 7.28 

d2 = d1 * 3,8 = 48,7 mm * 3,8 = 185,0 mm

Bei diesem rechnerisch ermittelten Achsabstand würden sich die beiden Riemenscheiben genau berühren. Aus diesem Grund muß der Achsabstand geringfügig größer gewählt werden.

| M1 | Nm | 20,6 |
| --- | --- | --- |
| M2 | Nm | 78,5 |
| SZ | N | 1.152 |
| β | ° | 35,7 |
|  | ° | 108,6 |
| eµ | - | 3,769 |
| SL | N | 305,7 |
| U | N | 846,3 |
| d1 | mm | 48,7 |
| d2 | mm | 185,0 |
| a | mm | 116,8 |

# Minimaler Scheibendurchmesser eines Riementriebes I

Je kleiner der Scheibendurchmesser wird, desto größer werden die Riemenkräfte. Da die Riemenkräfte aber durch die Belastbarkeit des Riemens begrenzt sind, kann der Scheibendurchmesser nicht beliebig klein werden, sondern darf einen Wert dmin nicht unterschreiten.

SZmax = zul * ARiemen = 20 N/mm² * 3 mm * 15 mm = 900 N Gl. 7.29

Gl. 7.32, hier Aufgabenstellung: a = d2

Übersetzungsverhältnis: d2 = 2 * d1

 = 180° - 2 *  = 180° - 2 * 14,5° = 151,0° Gl. 7.31

e = e0,7*2,635 = 6,33 = Gl. 7.23 

U = SZ – SL = 900 N – 142,2 N = 757,8 N Gl. 7.26

Gl. 7.28 

d2 = d1 * 2,0 = 316,7 mm * 2,0 = 633,4 mm

| SZ | N | 900 |
| --- | --- | --- |
| β | ° | 14,5 |
|  | ° | 151,0 |
| eµ | - | 6,33 |
| SL | N | 142,2 |
| U | N | 757,8 |
| d1min | mm | 316,7 |
| d2min | mm | 633,4 |

# Minimaler Scheibendurchmesser eines Riementriebes II

Je kleiner der Scheibendurchmesser wird, desto größer werden die Riemenkräfte. Da die Riemenkräfte aber durch die Belastbarkeit des Riemens begrenzt sind, kann der Scheibendurchmesser nicht beliebig klein werden, sondern darf einen Wert dmin nicht unterschreiten.

eµ = eµ*

SZmax = zul * ARiemen = 25 N/mm² * 3 mm * 20 mm = 1500 N für alle Reibwerte Gl. 7..29

Gl. 7.23 U = SZ – SL Gl. 7.26

Gl. 7.28 

|  |  | µ = 0,5 | µ = 0,6 | µ = 0,7 |
| --- | --- | --- | --- | --- |
| eµ | - | 4,810 | 6,586 | 9,017 |
| SZ | N | 1500 | 1500 | 1500 |
| SL | N | 311,9 | 227,8 | 166,4 |
| U | N | 1188,1 | 1272,2 | 1333,6 |
| dmin | mm | 424,2 | 396,2 | 377,9 |

# Brotbackmaschine

a. Gl. 7.32

Gl. 7.31

b.

Gl. 7.27

Gl. 7.28

Gl. 7.33

Gl. 7.45

Gl. 7.39

| a | d1 | mm | 12 |
| --- | --- | --- | --- |
|  | d2 | mm | 128 |
|  | a | mm | 170 |
|  |  | ° | 140,1 |
| b | M2max | Nmm | 7,39 |
| c | LRiemen | mm | 588,7 |
|  | a | mm | 3,37 |

# Riementrieb mit Auflegevorspannung

angetriebene Scheibe d2 = 420 mm

antreibende Scheibe d1 = = 140 mm

M1 = = 50,93 Nm Gl. 0.62

Gl. 7.28  U = = 727,6 N

Gl. 7.32

Gl. 7.31

e = e0,4*2,618 = 2,860

U = SZ – SL Gl. 7.26 mit 

Gl. 7.29  bmin = = 24,9 mm

= 755 N Gl. 7.39

a = Gl. 7.45

LRiemen = Gl. 7.33

LRiemen =

LRiemen = 2.025 mm

a = = 16,3 mm

Gl. 7.36

SVTeillast = 0,625 * SVVollast = 0,625 * 755,0 N = 471,8 N

ZTeillast = 0,625 * ZVolllast = 0,625 * 15 N/mm² = 9,4 N/mm²

aTeillast = 0,625 * aVolllast = 0,625 * 16,3 mm = 10,2 mm

| Wie groß ist die Umfangskraft? | U | N | 727,6 |
| --- | --- | --- | --- |
| Wie groß sind die Zugtrumkraft und die Leertrumkraft für den Fall, dass der Riementrieb an der Rutschgrenze betrieben wird? | SZ  SL | N  N | 1.118,7  391,2 |
| Die Riemenstärke beträgt 3 mm. Wie breit muss der Riemen sein, damit die für den Riemen zulässige Zugspannung von 15 N/mm² nicht überschritten wird? (Biege- und Fliehkrafteinflüsse können vernachlässigt werden). | b | mm | 24,9 |
| Welche Vorspannkraft muss in den Riemen eingeleitet werden, damit er nicht durchrutscht? | SV | N | 755 |
| Der Elastizitätsmodul des Riemens bezüglich Zug beträgt Estat = 650 N/mm². Um welchen Betrag muss der Achsabstand vergrößert werden, damit die erforderliche Riemenvorspannung erreicht wird? | a | mm | 16,3 |
| Wie groß ist dann die Kraft auf die Welle? | FWelle | N | 1.471,8 |
| Es sollen nunmehr nur noch 5 kW Leistung übertragen werden. Auf welchen Betrag kann dann die Vorspannkraft im Riemen zurückgenommen werden, so dass gerade kein Rutschen auftritt? Wie groß ist dann die Zugspannung im Riemen? Um welchen Betrag muss dann der Achsabstand vergrößert werden, damit die erforderliche Riemenvorspannung erreicht wird? | SV  σRiemen  a | N  N/mm²  mm | 471,8  9,4  10,2 |

# Zweistufiges Zahnradgetriebe II

Gl. 7.47

z2 = z1 * i = 14 * 4,47 = 62,6 ≈ 63 (ganzzahlig gerundet)

Eingangsstufe: p = m * π = 3 mm * π = 9,425 mm Gl. 7.55

d = m * z d1 = 3 mm * 14 = 42,000 mm

d2 = 3 mm * 63 = 189,000 mm

db = d * cos α Gl. 7.49

db1 = 42,000 mm * cos 20° = 39,467 mm

db2 = 189,000 mm * cos 20° = 177,602 mm

Gl. 7.50

da = d + 2 * m Gl. 7.70

da1 = 42,000 mm + 2 * 3 mm = 48,000 mm

da2 = 189,000 mm + 2 * 3 mm = 195,000 mm

Gl. 7.67

 1

Gl. 0.63

Gl. 0.62

Gl. 7.71

F = YF*Y*YS*KA*KV*KF*KF * Gl. 7.79

F =

Endstufe: p = m * π = 5 mm * π = 15,708 mm

d = m * z d1 = 5 mm * 14 = 70,000 mm

d2 = 5 mm * 63 = 315,000 mm

db = d * cos α db1 = 70,000 mm * cos 20° = 65,778 mm

db2 = 315,000 mm * cos 20° = 296,003 mm

da = d + 2 * m da1 = 70,000 mm + 2 * 5 mm = 80,000 mm

da2 = 315,000 mm + 2 * 5 mm = 325,000 mm

Gl. 7.124

 1



F = YF*Y*YS*KA*KV*KF*KF *

F =

|  |  | |  | Eingangsstufe | | Endstufe | |
| --- | --- | --- | --- | --- | --- | --- | --- |
|  |  | |  | Ritzel  Antriebs-welle | Großrad  Zwischen-welle | Ritzel  Zwischen-welle | Großrad  Abtriebs-welle |
| Modul | | m | mm | **3** | | **5** | |
| Zahnbreite | | b | mm | **45** | | **75** | |
| Übersetzungsverhältnis | | i | - | 4,47 | | 4,47 | |
| Zähnezahl | | z | - | **14** | 63 | **14** | 63 |
| Teilung | | p | mm | 9,425 | | 15,708 | |
| Wälzkreisdurchmesser | | d | mm | 42,000 | 189,000 | 70,000 | 315,000 |
| Grundkreisdurchmesser | | db | mm | 39,467 | 177,602 | 65,778 | 296,003 |
| Achsabstand | | a | mm | 115,5 | | 192,5 | |
| Kopfkreisdurchmesser | | da | mm | 48,000 | 195,000 | 80,000 | 325,000 |
| Überdeckungsgrad | | εα | - | 1,627 | | 1,628 | |
| Tangentialkraft | | Ft | N | 10.748 | | 28.825 | |
| Zahnfußspannung | | σF | N/mm² | 350 | | 338 | |

Die Geometriedaten der Endstufe hätten auch einfach über den Dreisatz aus den Zahlenwerten der Eingangsstufe mit dem Faktor mEndstufe / mEingangsstufe = 5/3 abgeleitet werden können: Die Endstufe ist nur eine lineare Vergrößerung der Eingangsstufe. Lediglich die Berechnung der Profilüberdeckung bleibt als Verhältnismäßigkeit genau erhalten

# Zweistufiges Zahnradgetriebe IV

Gl. 7.47

z2 = z1 * i = 17 * 4,47 = 75,99 ≈ 76 (ganzzahlig gerundet)

Eingangsstufe: p = m * π = 2,5 mm * π = 7,854 mm Gl. 7.55

d = m * z d1 = 2,5 mm * 17 = 42,500 mm

d2 = 2,5 mm * 76 = 190,000 mm

db = d * cos α Gl. 7.49

db1 = 42,500 mm * cos 20° = 39,937 mm

db2 = 190,000 mm * cos 20° = 178,542 mm

Gl. 7.50

da = d + 2 * m Gl. 7.70

da1 = 42,500 mm + 2 * 2,5 mm = 47,500 mm

da2 = 190,000 mm + 2 * 2,5 mm = 195,000 mm

Gl. 7.67

 1

Gl. 0.63

Gl. 0.62

Gl. 7.71

F = YF*Y*YS*KA*KV*KF*KF * Gl. 7.79

F =

Endstufe: p = m * π = 4 mm * π = 12,566 mm

d = m * z d1 = 4 mm * 17 = 68,000 mm

d2 = 4 mm * 76 = 304,000 mm

db = d * cos α db1 = 68,000 mm * cos 20° = 63,899 mm

db2 = 304,000 mm * cos 20° = 285,667 mm

da = d + 2 * m da1 = 68,000 mm + 2 * 4 mm = 76,000 mm

da2 = 304,000 mm + 2 * 4 mm = 312,000 mm

 1



F = YF*Y*YS*KA*KV*KF*KF *

F =

|  |  | |  | Eingangsstufe | | Endstufe | |
| --- | --- | --- | --- | --- | --- | --- | --- |
|  |  | |  | Ritzel  Antriebs-welle | Großrad  Zwischen-welle | Ritzel  Zwischen-welle | Großrad  Abtriebs-welle |
| Modul | | m | mm | **2,5** | | **4** | |
| Übersetzungsverhältnis | | i | - | 4,47 | | 4,47 | |
| Zähnezahl | | z | - | **17** | 76 | **17** | 76 |
| Teilung | | p | mm | 7,854 | | 12,566 | |
| Wälzkreisdurchmesser | | d | mm | 42,500 | 190,000 | 68,000 | 304,000 |
| Grundkreisdurchmesser | | db | mm | 39,937 | 178,542 | 63,899 | 285,667 |
| Achsabstand | | a | mm | 116,250 | | 186,000 | |
| Kopfkreisdurchmesser | | da | mm | 47,500 | 195,000 | 76,000 | 312,000 |
| Überdeckungsgrad | | εα | - | 1,667 | | 1,667 | |
| Tangentialkraft | | Ft | N | 7.498 | | 20.921 | |
| Zahnfußspannung | | σF | N/mm² | 422 | | 460 | |

Die Geometriedaten der Endstufe hätten auch einfach über den Dreisatz aus den Zahlenwerten der Eingangsstufe mit dem Faktor mEndstufe / mEingangsstufe = 4 / 2,5 abgeleitet werden können: Die Endstufe ist nur eine lineare Vergrößerung der Eingangsstufe. Auch die Berechnung der Profilüberdeckung bleibt als Verhältnismäßigkeit genau erhalten.

# Getriebe mit zwei Übersetzungsverhältnissen II

## Geometrie der Verzahnung

Die kleinste Zähnezahl (18) liegt am Ritzel des rechten Zahnradpaares vor.

Zahnradpaar Übersetzung 1:4,5

z1 = 18 z2 = z1 * i = 18 * 4,5 = 81

Gl. 7.50 und d = m * z Gl. 7.55

p = m *  = 3 mm *  = 9,425 mm

d1 = m * z1 = 3 mm * 18 = 54,000 mm d2 = m * z2 = 3 mm * 81 = 243,000 mm

Kontrollrechnung:

db1 = d1 * cos  = 54,000 mm * cos 20° = 50,743 mm Gl. 7.49

db2 = d2 * cos  = 243,000 mm * cos 20° = 228,345 mm

da1 = d1 + 2 * m = 54,000 mm + 2 * 3 mm = 60,000 mm Gl. 7.70

da2 = d2 + 2 * m = 243,000 mm + 2 * 3 mm = 249,000 mm

Gl. 7.67

 1

Zahnradpaar Übersetzung 1:3,5

z1 + z2 = 18 + 81 = 99 (wie beim Übersetzungsverhältnis 1:4,5)

→ z2 = 3,5 * z1

z1 + 3,5 * z1 = 99 → und z2 = 3,5 * 22 = 77

Kontrollrechnung:

d1 = m * z1 = 3 mm * 22 = 66,000 mm d2 = m * z2 = 3 mm * 77 = 231,000 mm

db1 = d1 * cos  = 66,000 mm * cos 20° = 62,020 mm

db2 = d2 * cos  = 231,000 mm * cos 20° = 217,069 mm

da1 = d1 + 2 * m = 66,000 mm + 2 * 3 mm = 72,000 mm

da2 = d2 + 2 * m = 231,000 mm + 2 * 3 mm = 237,000 mm

 1

|  |  |  | Rad oben links | Rad unten links | Rad oben rechts | Rad unten rechts |
| --- | --- | --- | --- | --- | --- | --- |
| Zähnezahl | z | - | 22 | 77 | 18 | 81 |
| Wälzkreisdurchmesser | d | mm | 66,000 | 231,000 | 54,000 | 243,000 |
| Grundkreisdurchmesser | db | mm | 62,020 | 217,069 | 50,743 | 228,345 |
| Kopfkreisdurchmesser | da | mm | 72,000 | 237,000 | 60,000 | 249,000 |
| Profilüberdeckung | ɛ | - | 1,701 | | 1,679 | |
| Achsabstand | a | mm | 148,500 | | | |

## Zahnradfestigkeit

F = YF*Y*YS*KA*KV*KF*KF * Gl. 7.79

für linkes Zahnradpaar:

für rechtes Zahnradpaar:

Gl. 7.71

für linkes Zahnradpaar:

für rechtes Zahnradpaar:

P = M * ω Gl. 0.62 Gl. 0.63

für linkes Zahnradpaar: P = 662,4 Nm * 214,7s-1 = 142 kW

für rechtes Zahnradpaar: P = 662,7 Nm * 214,7s-1 = 142 kW

|  |  | linkes Zahnradpaar | rechtes Zahnradpaar |
| --- | --- | --- | --- |
| Antriebsmoment | Nm | 662,4 | 662,7 |
| Leistung | kW | 142 | 142 |

# Getriebewelle Reibrad – Zahnrad

Gl. 0.63

P = Mt *  Gl. 0.62 

Kräfte am Reibrad:





## Festigkeit der Welle

Spannungen:

Gl. 0.39

Gl. 0.32

Gl. 0.54

|  | statisch | dynamisch |
| --- | --- | --- |
| L [N] = 0 | ZDstat [N/mm²] = 0 | ZDdyn [N/mm²] = 0 |
| Q [N] = 2.481 | Qstat [N/mm²] = 0 | Qdyn [N/mm²] = 3,8 |
| Mb [Nm] = 78,2 | bstat [N/mm²] = 0 | bdyn [N/mm²] = 32,7 |
| Mt [Nm] = 76,4 | tstat [N/mm²] = 16,0 | tdyn [N/mm²] = 0 |
|  | vstat [N/mm²] = 27,6 | vdyn [N/mm²] = 33,3 |

Vergleichsspannungen:

Gl. 1.3

## Reibrad

Gl. 7.11

Gl. 7.14

| Wie groß ist der Ersatzkrümmungsdurchmesser? | mm | 37,5 |
| --- | --- | --- |
| Wie hoch ist die Wälzpressung? | N/mm² | 1,21 |

## Welle-Nabe-Verbindung

Klärung der Geometrie:

Gl. 6.34

Gl. 6.36

Dimensionierung nach dem zu übertragenden Moment:

Bild 6.18 linke Dreieckseite

Bild 6.18 rechte Dreieckseite

| Wie groß ist der für die Momentenübertragung maßgebende mittlere Wellendurchmesser? | dm | mm | 25,9 |
| --- | --- | --- | --- |
| Wie groß ist die erforderliche Vorspannkraft der Schraube? | FV | N | 13.172 |
| Wie groß ist die Flächenpressung am Kegelmantel? | p | N/mm² | 29,0 |

## Zahnrad

d1 = z1 * m Gl. 7.52  z2 = z1 * i = 20 * 3 = 60

d2 = z2 * m = 60 * 2,5 mm = 150 mm

db1 = d1 * cos  = 50,000 mm * cos 20° = 46,985 mm Gl. 7.49

db2 = d2 * cos  = 150,000 mm * cos 20° = 140,954 mm

da1 = d1 + 2 * m = 50,000 mm + 2 * 2,5 mm = 55,000 mm Gl. 7.70

da2 = d2 + 2 * m = 150,000 mm + 2 * 2,5 mm = 155,000 mm

df1 = d1 - 2 * m – 2 * c Gl. 7.69

df1 = 50,000 mm - 2 * 2,5 mm - 2 * 0,25 * 2,5 mm = 44,875 mm

df2 = d2 - 2 * m – 2 * c = 150,000 mm - 2 * 2 mm– 2 * 0,25 * 2 mm = 144,875 mm

p = m *  = 2,5 mm *  = 7,854 mm Gl. 7.55

Gl. 7.50

Gl. 7.67

 1

|  |  | Rad 1 | Rad 2 |
| --- | --- | --- | --- |
| Zähnezahl z | - | 20 | 60 |
| Grundkreisdurchmesser db | mm | 46,985 | 140,954 |
| Wälzkreisdurchmesser dw | mm | 50,000 | 150,000 |
| Kopfkreisdurchmesser da | mm | 55,000 | 155,000 |
| Fußkreisdurchmesser df | mm | 44,875 | 144,875 |
| Teilung | mm | 7,854 | |
| Achsabstand | mm | 100,000 | |
| Profilüberdeckung  | - | 1,671 | |

 Gl. 7.71

 Gl. 7.72

 Gl. 7.73

| Tangentialkraft | Ft | N | 3.056 |
| --- | --- | --- | --- |
| Radialkraft | Fr | N | 1.112 |
| Normalkraft | Fn | N | 3.252 |

F = YF*Y*YS*KA*KV*KF*KF * Gl. 7.79

F =

| Zahnfußspannung | F | N/mm² | 359 |
| --- | --- | --- | --- |

## Lagerung

Kraftresultierende des Wälzgetriebes Q und Kraftresultierende der Verzahnung Fn wirken genau in **gleicher** Richtung:

Vorzeichenvereinbarung: die Kraftresultierende des Wälzgetriebes Q und die Kraftresultierende der Verzahnung Fn wirkt nach unten, Flinks und Frechts wirken nach oben:

M um linkes Lager:

-Fn * (84 – 68,5) mm + Frechts * (84 - 43) mm - Q * 84 mm = 0

M um rechtes Lager:

-Flinks * (84 - 43) mm + Fn * (68,5 - 43) mm - Q * 43 mm = 0

Gl. 5.9 Gl. 5.10

linkes Lager:

rechtes Lager:

|  | | Kraftresultierende des Wälzgetriebes Q und  Kraftresultierende der Verzahnung Fn wirken genau in | | | |
| --- | --- | --- | --- | --- | --- |
|  | | **gleiche** Richtung | | **entgegengesetzte** Richtung | |
|  |  | links | rechts | links | rechts |
| FLager | N | - 579 | 6.312 | 4.625 | - 3.854 |
| Lh | h | 4.744 | 3.662 | 9,3 | 16.087 |

Kraftresultierende des Wälzgetriebes Q und Kraftresultierende der Verzahnung Fn wirken genau in **umgekehrter** Richtung:

Vorzeichenvereinbarung: Kraftresultierende des Wälzgetriebes Q wirkt nach oben, die Kraftresultierende der Verzahnung Fn wirkt nach unten, Flinks und Frechts wirken nach oben:

M um linkes Lager:

- Fn * (84 - 68,5) mm + Frechts * (84 - 43) mm + Q * 84 mm = 0

M um rechtes Lager:

-Flinks * (84 + 43) mm + Fn * (68,5 - 43) mm + Q * 43 mm = 0

linkes Lager:

rechtes Lager:
