# Supplementary material
Source: publisher site journal article supplement (https://www.degruyterbrill.com/publication/isbn/9783110692143/downloadAsset/9783110692143_Zusatzmaterial_Basiswissen.zip)
Supplement: Supplementary file 17 [file Basiswissen 1. Auflage, Lösungen Kap. 0.doc]

Basiswissen Maschinenelemente
Lösungen

von
Prof. Dr.-Ing. Hubert Hinzen

Dozent an der Fachhochschule Trier, Fachbereich Technik

Oldenbourg Verlag München Wien Vers. 1.0

Lösungen zu Kapitel 0 „Grundlagen der Festigkeitslehre“

Grundlagen der Festigkeitslehre

Spannungs-Dehnungs-Diagramm

A.0.1 Verformung und Belastbarkeit

mit

bei F = 7 kN:

aus Diagramm abgelesen: nur elastische Dehnung mit elast = 0,55 * 10-3

Lelast = elast * L0 = 0,55 * 10-3 * 200 mm = 110 µm

bei F = 14 kN:

aus Diagramm abgelesen: nur elastische Dehnung mit elast = 1,10 * 10-3

Lelast = elast * L0 = 1,10 * 10-3 * 200 mm = 220 µm

bei F = 21 kN:

- die waagerechte Linie für  = 267 N/mm² bringt man mit der Werkstoffkennlinie zum Schnitt und erhält damit den Belastungspunkt
- von diesen Belastungspunkt aus trägt man sowohl eine senkrechte Linie als auch eine Parallele zur Hook’schen Geraden an
- auf der -Achse ergibt sich zwischen dem Koordinatenursprung und der Parallelen zur Hook’schen Geraden der plastische Verformungsanteil mit plast = 2,00 * 10-3 und der elastische Verformungsanteil zwischen Hook’scher Gerade und der Senkrechten der elastische Verformungsanteil mit elast = 1,60 * 10-3 (s. auch Bild 0.6 auf S. 7)

Lelast = elast * L0 = 1,6 * 10-3 * 200 mm = 320 µm

Lplast = plast * L0 = 2,0 * 10-3 * 200 mm = 400 µm

| Zugbelastung [kN] | 7 | 14 | 21 |
| --- | --- | --- | --- |
| elast [10-3] | 0,55 | 1,1 | 1,6 |
| plast [10-3] | 0 | 0 | 2 |
| Lelast [µm] | 110 | 220 | 320 |
| Lplast [µm] | 0 | 0 | 400 |



beliebige Kombination von  und  auf der Hook’schen Geraden

| E [N/mm²] | ca. 160 000 |
| --- | --- |

abgelesen: elastmax =225 N/mm²

Fmaxelast = maxelast * A = 225 N/mm² * 78,54 mm² = 17 672 N

| Fmaxelast [N] | 17 672 |
| --- | --- |

abgelesen: B =270 N/mm²

Fmaxplast = B * A = 270 N/mm² * 78,54 mm² = 21 206 N

| Fmaxplast [N] | 21 206 |
| --- | --- |

A.0.2 Werkstoffvergleich

| Werkstoff | I | II | III |
| --- | --- | --- | --- |
| Welcher Werkstoff weist den geringsten Elastizitätsmodul auf? |  |  | X |
| Welcher Werkstoff hat die geringste Steifigkeit? |  |  | X |
| Welcher Werkstoff weist die größte Streckgrenze auf? | X |  |  |
| Welcher Werkstoff erträgt die geringste Bruchlast? |  | X |  |
| Welcher Werkstoff zeigt beim Bruch die geringste plastische Dehnung? |  |  | X |

Zugspannung

A.0.3 Zugspannung homogener Werkstoffe

a. Tabelle S. 9: St60  zul = 325 – 335 N/mm²

A =

Fzul = zul * A = 330 N/mm² * 78,54 mm² = 25 918 N

b.

Tabelle S. 9: 42CrMo4  zul = 765 N/mm²

S = = 1,84

A.0.4 Flaschenzug

1. G = m * g = 250 kg * 9,81 m/s² = 2.453 N
2. D = 5 * F = 5 * 613 N = 3.066 N
3. 
   für Stahl:
   für Aluminium:
4. 
   für Stahl:
   für Aluminium:
    

   Last unten: L0 = 5 * 12 m = 60 m
   Last auf halber Höhe: L0 = 4 * 6 m + 12 m = 36 m
   Last oben: L0 = 12 m

   für Stahl, Last unten: ΔL = 60 m * 1,429 * 10-3 = 85,7 mm
   für Stahl, Last auf halber Höhe: ΔL = 36 m * 1,429 * 10-3 = 51,4 mm
   für Stahl, Last oben: ΔL = 12 m * 1,429 * 10-3 = 17,1 mm

   für Aluminium, Last unten: ΔL = 60 m * 1,818 * 10-3 = 109,1 mm
   für Aluminium, Last auf halber Höhe: ΔL = 36 m * 1,818 * 10-3 = 65,5 mm
   für Aluminium, Last oben: ΔL = 12 m * 1,818 * 10-3 = 21,8 mm

|  |  |  | d | e | f | g |
| --- | --- | --- | --- | --- | --- | --- |
|  | zul  [N/mm²] | E  [N/mm²] | A  [mm²] | L [mm]  Last unten | L [mm]  Last halbe Höhe | L [mm]  Last oben |
| Stahl | 300 | 2,1 * 105 | 2,043 | 85,7 | 51,4 | 17,1 |
| Aluminium | 200 | 1,1 * 105 | 3,065 | 109,1 | 65,5 | 21,8 |

Biegung mit genormten Halbzeugen

A.0.5 U-Profil nach Norm

b = Mb = F * L = 300 N * 700 mm = 210 Nm

Wax nach Tabelle S. 18; Kraft wirkt in y-Richtung, Biegemoment als Kreuzprodukt von Kraft und Hebelarm wirkt in z-Richtung, deshalb Wz ansetzen

= 244,2 N/mm²

Tabelle S. 9: St52: Re = 345 N/mm² S = = 1,41

A.0.6 I-Profil

b = Mb = F * L = 4380 N * 1435 mm = 6285 Nm

Tabelle S. 9: St44: Re = 265 - 275 N/mm²

1. Wax nach Tabelle S. 17 unten; Kraft wirkt in z-Richtung, Biegemoment als Kreuzprodukt von Kraft und Hebelarm wirkt in y-Richtung, deshalb Wy ansetzen

= 114,9 N/mm²

S = = 2,35 hält stand

1. Wax nach Tabelle S. 17 unten; Kraft wirkt in y-Richtung, Biegemoment als Kreuzprodukt von Kraft und Hebelarm wirkt in z-Richtung, deshalb Wz ansetzen

= 848,2 N/mm²

S = =0,32 hält nicht stand

Biegung, Suche nach der kritischen Stelle innerhalb eines Bauteils

A.0.7 Hubvorrichtung mit starrem Ausleger

1. An der Rolle wirkt die Seilkraft mit 11 772 N sowohl nach unten als auch nach links (Reaktionskraft im Seil). Diese beiden Kräfte können in die Rollenachse parallelverschoben werden. Da diese Parallelverschiebung mit jeweils gleichem Abstand (= Hebelarm) erfolgt, heben sich die durch die Parallelverschiebung entstehenden Momente gegenseitig auf. Es ergibt sich also eine resultierende Kraft von 16 648 N, die an der Rollenachse unter einem Winkel von 45° nach links unter angreift.
2. Die graphische Auftragung wird vereinfacht, wenn man die x- und y-Komponente der an der Rolle angreifenden Kraft zunächst getrennt betrachtet und anschließend beide Biegemomentenverläufe überlagert.
3. Das größte Biegemoment tritt an der Verbindungsstelle des waagerechten mit dem linken senkrechten Balken auf.
4. Mbmax = 11772 N * (400 mm + 1200 mm) = 18,84 * 106 Nmm
5. 
   beispielsweise I 180 nach DIN 1025 T1 oder IPB 120 nach DIN 1025 T2, jeweils „hochkant“ angeordnet

Biegung mit veränderlichem Kraftangriffspunkt

A.0.8 Hubvorrichtung mit höhenverstellbarem Ausleger

a. In der waagerechten Lage des Auslegers ( = 0°) wirkt die lastbedingte Kraft am linken Ende des Balkens normal zum Balken und verursacht damit die größte Biegemomentenbelastung.

|  | [°] = 0 |
| --- | --- |

b. Das größte Biegemoment tritt am Anlenkpunkt des Hubzylinders auf.

Mbmax = 2.200 kg * 9,81 m/s² * 1.000 mm = 21,582 * 106 Nmm

|  | Mbmax[Nm] = 21.582 |
| --- | --- |



| c. | Waxmin[mm³] = 359.700 |
| --- | --- |

d. Jedes der beiden nebeneinander liegenden Profile muß also ein minimales Widerstandsmoment aufweisen. Das Profil U 200 nach DIN 1026 mit 191.000 mm³ erfüllt diese Bedingung.

|  | U 200 nach DIN 1026 |
| --- | --- |

A.0.9 Rollenlaufbahn

Kritische Laststellung

|  | x = f(a) = a/2 |
| --- | --- |

Maximaler Laufbahnabschnitt

F = m * g = 1.500 kg * 9,81 m/s² = 14.715 N; Wax = 144.000 mm³

teilt sich in der kritischen Stellung je zur Hälfte auf das linke und rechte Auflager auf

|  | amax [mm] = 5.710 |
| --- | --- |

A.0.10 Widerstandsmomente nach Grundmustertabelle, Rechteckquerschnitt

(sämtliche Ergebnisse in mm4)

|  | Voll-  querschnitt | mitteldicke Wandstärke | mitteldünne Wandstärke | dünne  Wandstärke |
| --- | --- | --- | --- | --- |
| quer | = 104.167 | = 281.662 | = 327.132 | = 1.885.417 |
| Qua-drat | = 333.293 | = 444.185 | = 866.667 | = 3.341.667 |
| hoch-kant | = 1.066.667 | = 540.047 | = 771.606 | = 4.797.917 |

(sämtliche Ergebnisse in mm3)

|  | Voll-  querschnitt | mitteldicke Wandstärke | mitteldünne Wandstärke | dünne  Wandstärke |
| --- | --- | --- | --- | --- |
| quer | = 8.333 | = 14.261 | = 16.357 | =50.278 |
| Qua-drat | = 14.906 | = 18.393 | = 28.889 | = 63.651 |
| hoch-kant | = 26.667 | = 19.638 | = 24.527 | = 71.080 |

(sämtliche Ergebnisse in N/mm2)

|  | Voll-  querschnitt | mitteldicke Wandstärke | mitteldünne Wandstärke | dünne  Wandstärke |
| --- | --- | --- | --- | --- |
| quer |  |  |  |  |
| Qua-drat |  |  |  |  |
| hoch-kant |  |  |  |  |

Gesamtzusammenstellung:

|  |  |  | Voll-querschnitt | mitteldicke Wandstärke | mitteldünne Wandstärke | dünne Wandstärke |
| --- | --- | --- | --- | --- | --- | --- |
| quer | Iaxy  Waxy  σb | mm4  mm3  N/mm2 | 104.167  8.333  1.200 | 281.662  14.261  701 | 327.132  16.357  611 | 1.885.417  50.278  199 |
| Qua-drat | Iaxy  Waxy  σb | mm4  mm3  N/mm2 | 333.293  14.906  671 | 444.185  18.393  544 | 866.667  28.889  346 | 3.341.667  63.651  157 |
| hoch-kant | Iaxy  Waxy  σb | mm4  mm3  N/mm2 | 1.066.667  26.667  375 | 540.047  19.638  509 | 771.606  24.527  408 | 4.797.917  71.080  141 |

Schubspannung

A.0.11 Querkraftschub

durch den Faktor 3 gegenüber der Streckgrenze soll das Abscheren sichergestellt werden

A.0.12 Torsionsschub

Mt = F * L = 400 N * 800 mm = 320 Nm

Wpol = = 4 743 mm³

t = = 67,5 N/mm²

Berechnung von polaren Widerstandsmomenten

A.0.13 Widerstandsmomente nach Grundmustertabelle, Kreisquerschnitt

**Biegung:**

Vollquerschnitt: Wax =

dickwandiges Rohr: Wax =

dünnwandiges Rohr: Wax =

= 50.370 mm³

**Torsion:**

Vollquerschnitt: Wpol =

dickwandiges Rohr: Wpol =

dünnwandiges Rohr: Wpol =

= 100.739 mm³

|  |  |  | Voll-querschnitt | dickwandiges  Rohr | dünnwandiges  Rohr |
| --- | --- | --- | --- | --- | --- |
| Biegung | Wax  σb | mm3  N/mm2 | 12.614  793 | 16.911  591 | 50.370  199 |
| Torsion | Wpol  τt | mm3  N/mm2 | 25.227  396 | 33.822  296 | 100.739  99 |

Die Spannungen sinken mit dünnerer Wandstärke

Die Beträge der Torsionsspannungen sind stets halb so hoch wie die der Biegespannungen
