# Supplementary material
Source: publisher site journal article supplement (https://www.degruyterbrill.com/publication/isbn/9783110692143/downloadAsset/9783110692143_Zusatzmaterial_Basiswissen.zip)
Supplement: Supplementary file 19 [file Basiswissen 1. Auflage, Lösungen Kap. 2.doc]

Basiswissen Maschinenelemente
Lösungen

von
Prof. Dr.-Ing. Hubert Hinzen

Dozent an der Fachhochschule Trier, Fachbereich Technik

Oldenbourg Verlag München Wien Vers. 1.0

Lösungen zu Kapitel 2 „Federn“

Lösungen: Federn

Ersatzfedersteifigkeiten

A.2.1 Drei Schraubendruckfedern

links: Feder 2 und Feder 3 sind parallel geschaltet:

c23 = c2 + c3 = 12 N/mm + 4 N/mm = 16 N/mm

Kombination von Feder 2 und Feder ist mit Feder 1 hintereinander geschaltet:

 cges links = 4,364 N/mm

rechts: Feder 1 und Feder 2 sind parallel geschaltet:

c12 = c1 + c2 = 6 N/mm + 12 N/mm = 18 N/mm

Kombination von Feder 1 und Feder 2 ist mit Feder 3 hintereinander geschaltet:  cges rechts = 3,273 N/mm

A.2.2 Gesamtsteifigkeit Schraubenzugfeder

1. 2 Federn parallel
2. 3 Federn parallel
3. 2 Federn hintereinander
4. 4 Federn hintereinander
5. Hintereinanderschaltung von zwei Anordnungen nach b.)
6. Hintereinanderschaltung von drei Anordnungen nach a.)

A.2.3 Beidseitige Einspannung

Druckfeder 200 mm:

Beide Federn finden genau in dem Raum zwischen der Wand und dem verschiebbaren Block Platz, reagieren aber nur bei Druckverformung mit einer Kraft. Wird der Block aus dieser Lage ausgelenkt, so wirkt jeweils nur eine Feder. Die Gesamtsteifigkeit entspricht also der Steifigkeit einer einzelnen Feder.

Zug-/Druckfeder 200 mm:

Beide Federn finden wie zuvor genau in dem Raum zwischen der Wand und dem verschiebbaren Block Platz, reagieren aber sowohl bei Zug- als auch bei Druckverformung mit einer Kraft. Beide Federn werden mit dem gleichen Federweg verformt, sie sind also in Parallelschaltung angeordnet. Wird der Block aus der Mittellage ausgelenkt, so reagieren beide Federn. Die Gesamtsteifigkeit entspricht also doppelt so hoch wie eine Einzelsteifigkeit.

Druckfeder mit 220 mm Länge:

Beide Federn müssen um jeweils 20 mm zusammengedrückt werden, um in den Zwischenraum zwischen der Wand und dem verschiebbaren Block angeordnet zu werden. Wird der Block aus der Mittellage ausgelenkt, so werden beide Federn mit dem gleichen Federweg verformt. Die Gesamtsteifigkeit entspricht also der doppelten Einzelsteifigkeit.

Die Lösung zur letzten Konstruktionsvariante kann auch folgendermaßen abgeleitet werden:

Für die Montage muß jede der beiden Federn um 20 mm zusammengedrückt werden und reagiert darauf mit einer Kraft von F = c * f = 10 N/mm * 20 mm = 200 N. Diese beiden Kräfte heben sich jedoch gegenseitig auf, so daß der Block in mittiger Lage verbleibt. Wird der Block aus dieser mittigen Lage um beispielsweise 1 mm ausgelenkt, so wird die in Auslenkungsrichtung liegende Feder um insgesamt 21 mm zusammengedrückt und entwickelt dabei eine Kraft von 210 N, die auf der anderen Seite liegende Feder wird dann nur noch um 19 mm zusammengedrückt, worauf sie mit einer Kraft von 190 N reagiert. Betrachtet man nun das Kräftegleichgewicht am Block, so müssen 210 N – 190 N = 20 N aufgebracht werden, um den zuvor angenommenen Federweg von 1 mm herbei zu führen. Die Gesamtsteifigkeit beträgt also:

|  | unverformte Federlänge | Steifigkeit einer einzelnen Feder | Steifigkeit des Gesamtsystems |
| --- | --- | --- | --- |
| Druckfeder | 200 mm | 10 N/mm | 10 N/mm |
| Zug-/Druckfeder | 200 mm | 10 N/mm | 20 N/mm |
| Druckfeder | 220 mm | 10 N/mm | 20 N/mm |

Federbauformen

Drehstabfeder

A.2.4 Variation von Steifigkeit und Belastbarkeit

Gl. 2.6 und Bild 0.21

Gl. 2.19

Gl. 2.17

b. gleiche Belastbarkeit  Mtmax bleibt erhalten

erforderlicher Durchmesser bleibt erhalten

doppelte Steifigkeit  ct wird verdoppelt

Federlänge wird halbiert

speicherbare Arbeit wird halbiert

Federmasse wird halbiert

c. doppelte Belastbarkeit  Mtmax wird verdoppelt



gleiche Steifigkeit  ct bleibt gegenüber a. erhalten



=

|  | b. gleiche Belastbarkeit doppelte Steifigkeit | a. Ausgangsfall | c. doppelte Belastbarkeit gleiche Steifigkeit |
| --- | --- | --- | --- |
| Federdurchmesser  d [mm] | 18 | 18 | 22,68 |
| Federlänge L [mm] | 141 | 282 | 710,84 |
| Federsteifigkeit ct [Nm] | 5.116 | 2.558 | 2.558 |
| Belastbarkeit Mtmax [Nm] | 733 | 733 | 1.466 |
| speicherbare  Arbeit Wmax [Nm] | 52,5 | 105 | 420 |
| Federmasse  m [g] | 281 | 562 | 2.251 |

A.2.5 Variation der Momenteneinleitungsstelle

In jedem Fall handelt es sich um die Parallelschaltung von linker und rechter Feder.

für alle Fälle gilt:

nach Bild 0.21

nach Bild 0.21

Im Fall A sind beide Teilfedern gleich.

Einzelsteifigkeit: Gl. 2.6

Gesamtsteifigkeit: cges = 2 * ceinzeln = 4.810 Nm

Belastbarkeit Einzelfeder: Mteinzeln = zul * Wpol = 540 N/mm² * 1145 mm³ = 618 Nm

Belastbarkeit Gesamtsystem: Mtges = Mtlinks + Mtrechts = 2 * 618 Nm = 1.236 Nm

Die Verformungen am Teilsystem und am Gesamtsystem sind gleich:



Für die Fälle B und C sind die beiden Teilsysteme über den gemeinsamen Verdrehwinkel gekoppelt. Nur die jeweils steifere Feder darf bis an ihre Belastbarkeitsgrenze herangeführt werden, die Belastbarkeit des jeweils anderen Teilsystems kann nicht voll ausgenutzt werden.

Fall B:

cges = clinks + crechts =3.607 Nm + 1.804 Nm = 5.411 Nm

Nur die linke (steifere) Feder ist in ihrer Belastbarkeit voll ausnutzbar:

Mtlinks = 618 Nm (wie Fall A)

Dabei erfährt die linke Feder die folgende Verformung:

Beide Teilsysteme sind über den gemeinsamen Verdrehwinkel gekoppelt. Das rechte Teilsystem erfährt dabei die folgende Belastung:

Mtrechts = crechts * B = 1.804 Nm * 0,171 = 309 Nm

Mtges = Mtlinks + Mtrechts = 618 Nm + 309 Nm = 927 Nm

Fall C:

cges = clinks + crechts =  + 1.202 Nm =  das System verformt sich nicht

Nur die linke (steifere) Feder ist in ihrer Belastbarkeit voll ausnutzbar:

Mtlinks = 618 Nm (wie Fall A)

Dabei verformt sich die linke Feder nicht:

Das rechte Teilsystem kann keine Belastung aufnehmen:

Mtrechts = crechts * B = 1.202 Nm * 0 = 0

Mtges = Mtlinks + Mtrechts = 618 Nm + 0 Nm = 618 Nm

|  | Fall A | | | Fall B | | | Fall C | | |
| --- | --- | --- | --- | --- | --- | --- | --- | --- | --- |
|  | linke Feder | rechte Feder | Gesamt-system | linke Feder | rechte Feder | Gesamt-system | linke Feder | rechte Feder | Gesamt-system |
| maximales Lastmoment Mtmax [Nm] | 618 | 618 | 1.236 | 618 | 309 | 927 | 618 | 0 | 618 |
| Torsions-steifigkeit cT [Nm] | 2.405 | 2.405 | 4.810 | 3.607 | 1.804 | 5.411 |  | 1.202 |  |
| Verdrehwinkel bei Maximallast max [°] | 14,73 | 14,73 | 14,73 | 9,82 | 9,82 | 9,82 | 0 | 0 | 0 |

A.2.6 Drei rohrförmige Federn

Sowohl bei Zug-/Druckbelastung als auch bei Torsionsbelastung liegt eine Hintereinanderschaltung von drei Federn (inneres, mittleres und äußeres Rohr) vor.

**Zug-/Druckfeder**

 Gl. 0.1

innen:

Mitte:

außen:

das äußere Rohr ist das schwächste Glied in der Kette

Steifigkeit Zug-/Druckfeder: Gl. 2.3

Gl. 2.11 cges = 162,5 N/µm

Gl. 2.15

**Torsion**

Die Torsionsbelastbarkeit muß für alle Rohre einzeln geklärt werden:

Gl. 0.36  mit Bild 0.21

innen:

Mitte:

außen:

Das innere Rohr ist das Schwachglied in der Kette

Steifigkeit Torsionsfeder: Gl. 2.6 mit Bild 0.21

Gl. 2.11 ctges = 9.418 Nm

Gl. 2.17

|  | **Zug-/Druckfeder** | **Drehstabfeder** |
| --- | --- | --- |
| Belastbarkeit inneres Rohr | Fmaxi [N] = 146.838 | Mtmaxi [Nm] = 1.054,1 |
| Belastbarkeit mittleres Rohr | Fmaxm [N] = 144.261 | Mtmaxm [Nm] = 1.617,4 |
| Belastbarkeit äußeres Rohr | Fmaxa [N] = 95.316 | Mtmaxa [Nm] = 1.466,6 |
| Gesamtbelastbarkeit | Fmaxges [N] = 95.316 | Mtmaxges [Nm] = 1.054,1 |
| Steifigkeit inneres Rohr | ci [N/µm] = 578,5 | cti [Nm] = 17.838 |
| Steifigkeit mittleres Rohr | cm [N/µm] = 568,4 | ctm [Nm] = 37.324 |
| Steifigkeit äußeres Rohr | ca [N/µm] = 375,5 | cta [Nm] = 42.874 |
| Gesamtsteifigkeit | cges [N/µm] = 162,5 | ctges [Nm] = 9.418 |
| max. speicherbare Arbeit | Wmax [Nm] = 27,95 | Wmax [Nm] = 59,0 |

Schraubenfeder als Zug-/Druckfeder

A.2.7 Schraubenzugfeder

Aus der Zeichnung lassen sich die für die Berechnung maßgebenden Daten ablesen:

d = 1 mm Dm = 18 mm i = 15

Gl. 2.23

Gl. 2.25

Gl. 2.29



Gl. 2.14





| Welche maximale Zugkraft kann in die Feder eingeleitet werden? | Fmax [N] = | 9,362 |
| --- | --- | --- |
| Wie groß ist die Steifigkeit  dieser Feder? | c [N/mm] = | 0,121 |
| Um welchen maximalen Federweg darf die Feder ausgelenkt werden? | fmax [mm] = | 77,1 |
| Wie groß ist die Arbeit, die maximal in dieser Feder gespeichert werden kann? | Wmax [Nm] = | 0,362 |
| Um welchen Federweg lenkt sich die Feder aus, wenn sie mit 6 N belastet wird? | f(6N) [mm] = | 49,6 |
| Welche Kraft stellt sich ein, wenn die Feder um 5 mm ausgelenkt wird? | F(5 mm) [N] = | 0,6 |

A.2.8 Schraubenzugfeder unter Volllast und Teillast

Aus der Zeichnung lassen sich die für die Berechnung maßgebenden Daten ablesen:

d = 3 mm Dm = 18 mm i = 10

Aufgabenteil a:

Gl. 2.23

Gl. 2.25

Gl. 2.29



Gl. 2.14

Aufgabenteil b:



Aufgabenteil c:



Aufgabenteil d:

Gl. 2.15 

Gl. 2.16 

|  | Aufgabenteil a | Aufgabenteil b | Aufgabenteil c | Aufgabenteil d |
| --- | --- | --- | --- | --- |
|  | Volllast | Teillast mit | Teillast mit | Teillast mit |
| F [N] | 266,6 | **200** | 147,6 | 243,0 |
| f [mm] | 18,1 | 13,6 | **10** | 16,5 |
| W [Nm] | 2,408 | 1,355 | 0,738 | **2,000** |

A.2.9 Federwaage



für zul = 300 N/mm²:

Annahme: K = 1,2  d = 2,535 mm

 K = 1,175  d = 2,517 mm

 K = 1,173  d = 2,516 mm

für zul = 400 N/mm²:

Annahme: K = 1,2  d = 2,304 mm

 K = 1,157  d = 2,276 mm

 K = 1,155  d = 2,274 mm

für zul = 500 N/mm²:

Annahme: K = 1,2  d = 2,138 mm

 K = 1,145  d = 2,105 mm

 K = 1,142  d = 2,104 mm

für zul = 600 N/mm²:

Annahme: K = 1,2  d = 2,012 mm

 K = 1,136  d = 1,976 mm

 K = 1,133  d = 1,974 mm

für zul = 700 N/mm²:

Annahme: K = 1,2  d = 1,912 mm

 K = 1,128  d = 1,873 mm

 K = 1,126  d = 1,871 mm

Die genaue Berechnung des Drahtdurchmessers kann zwar fertigungstechnisch kaum realisiert werden, erleichtert aber die Bewertung der Ergebnisse.

mit

|  | | a | b | c |
| --- | --- | --- | --- | --- |
| zul | K | d | iW | m |
| N/mm² | - | mm | - | g |
| 300 | 1,173 | 2,516 | 17,5 | 42,9 |
| 400 | 1,155 | 2,274 | 11,7 | 23,4 |
| 500 | 1,142 | 2,104 | 8,57 | 14,7 |
| 600 | 1,133 | 1,974 | 6,64 | 10,0 |
| 700 | 1,126 | 1,871 | 5,36 | 7,26 |

A.2.10 Schraubenzugfeder, Variation von Steifigkeit und Belastbarkeit

mF = Volumen * spezifisches Gewicht

mF = Querschnittsfläche Federdraht * Federdrahtlänge * spez. Gewicht

mF = Querschnittsfläche Federdraht *

Umfang einer Windung * Anzahl Windungen * spez. Gewicht

Fall b. und c.:

gleiche Belastbarkeit (Fmax bleibt erhalten) bedeutet, daß

- bei vorgegebenem Federdrahtdurchmesser der Windungsdurchmesser nicht verringert werden darf (b.)
- bei vorgegebenem Windungsdurchmesser der Federdrahtdurchmesser nicht verringert werden darf (c.)

 Fall b. und c. sind gleich!

cb,c = 2 * ca = 2 * 0,448 N/mm = 0,896 N/mm

die Steifigkeit wird verdoppelt durch Halbierung der Anzahl der federnden Windungen; dadurch wird die Federmasse halbiert

 durch Verdopplung der Steifigkeit

wird die speicherbare Arbeit halbiert

1. Verdoppelung der Belastbarkeit (Fmaxd = 2 * Fmaxa) bedeutet, daß bei beibehaltenem Drahtdurchmesser der Windungsdurchmesser aus Festigkeitsgründen neu dimensioniert werden muß:



K zunächst unbekannt, deshalb vorläufige Annahme K = 1,1

 K = 1,225

 K = 1,255

 K = 1,262

gerundet: Dm = 6,5 mm

 durch Verdopplung der Belastbarkeit

wird die speicherbare Arbeit vervierfacht

1. Verdoppelung der Belastbarkeit (Fmaxe = 2 * Fmaxa) bedeutet, daß bei beibehaltenem Windungsdurchmesser der Drahtdurchmesser aus Festigkeitsgründen neu dimensioniert werden muß:



K zunächst unbekannt, deshalb vorläufige Annahme K = 1,1

 K = 1,136

 K = 1,137

runden: d = 1,6 mm

 durch Verdopplung der Belastbarkeit

wird die speicherbare Arbeit vervierfacht

|  | gleiche Belastbarkeit  doppelte Steifigkeit | | Ausgangsfall | doppelte Belastbarkeit  gleiche Steifigkeit | |
| --- | --- | --- | --- | --- | --- |
|  | c. | b. | a. | d. | e. |
| Federdurchmesser  d [mm] | 1,2 | 1,2 | 1,2 | 1,2 | 1,6 |
| Windungsdurch-messer Dm [mm] | 15 | 15 | 15 | 6,5 | 15 |
| Anzahl federnde Windungen iw | 6 | 6 | 12 | 147,5 | 37,9 |
| Federsteifigkeit  c [N/mm] | 0,896 | 0,896 | 0,448 | 0,448 | 0,448 |
| Federbelastbarkeit  Fmax [N] | 24,54 | 24,54 | 24,54 | 49,08 | 49,08 |
| speicherbare Arbeit Wmax [Nm] | 0,336 | 0,336 | 0,672 | 2,688 | 2,688 |
| Federmasse  m [g] | 2,5 | 2,5 | 5,0 | 26,7 | 28,2 |

Die Federmasse steigt nicht exakt linear mit der Federarbeit, weil der Wahl’sche Faktor K bei engeren Windungen ungünstiger wird und deshalb eine größere Federmasse eingesetzt werden muß.

A.2.11 Vier schraubenförmig gewendelte Zug-/Druckfedern

Gl. 2.23

Gl. 2.25

Gl. 2.29



| Fmaxeinzeln | N | 236,7 |
| --- | --- | --- |
| ceinzeln | N/mm | 4,557 |
| fmaxeinzeln | mm | 51,94 |

Kraftangriff bei A oder E:

das System kann sich nicht verformen, bezüglich der Federn könnte sogar eine unendlich große Kraft wirken

Kraftangriff bei C:

das linke Teilsystem besteht aus den hintereinander geschalteten Federn 1 und 2

das rechte Teilsystem besteht aus den hintereinander geschalteten Federn 3 und 4

das Gesamtsystem ist eine Parallelschaltung von linkem und rechtem Teilsystem

alle Federn können sich um die maximal mögliche Auslenkung verformen und entwickeln dabei die Fmaxeinzeln; am Kraftangriffspunkt wirkt diese Kraft vom linken und rechten Teilsystem

FgesmaxC = 2 * Fmaxeinzeln = 2 * 236,7 N = 473,4 N

Kraftangriff bei B:

das linke Teilsystem besteht nur aus Feder 1

das rechte Teilsystem besteht aus den hintereinander geschalteten Federn 2, 3 und 4

das Gesamtsystem ist eine Parallelschaltung von linkem und rechtem Teilsystem

das linke Teilsystem kann um die maximal mögliche Auslenkung verformt werden und entwickelt dabei die Fmaxeinzeln; diese Verformung verteilt sich im rechten Teilsystem auf drei Federn, so daß dort nur ein Drittel der maximal möglichen Kraft wirken kann

das gleiche Ergebnis ergibt sich, wenn die Gesamtsteifigkeit an der Krafteinleitungsstelle B formuliert:

 FgesmaxB = cgesB * fmaxB = 6,076 N/mm * 51,94 mm = 315,6 N

Kraftangriff bei D:

die Verhältnisse von B kehren sich genau um

|  | A | B | C | D | E |
| --- | --- | --- | --- | --- | --- |
| cges [N/mm] |  | 6,076 | 4,557 | 6,076 |  |
| f1max [mm] | 0 | 51,94 | 51,94 | 17,31 | 0 |
| f2max [mm] | 0 | 17,31 | 51,94 | 17,31 | 0 |
| f3max [mm] | 0 | 17,31 | 51,94 | 17,31 | 0 |
| f4max [mm] | 0 | 17,31 | 51,94 | 51,94 | 0 |
| Fgesmax [N] |  | 315,5 | 473,4 | 315,6 |  |
