# Supplementary material
Source: publisher site journal article supplement (https://www.degruyterbrill.com/publication/isbn/9783110692143/downloadAsset/9783110692143_Zusatzmaterial_Basiswissen.zip)
Supplement: Supplementary file 20 [file Basiswissen 1. Auflage, Lösungen Kap. 3.doc]

Basiswissen Maschinenelemente
Lösungen

von
Prof. Dr.-Ing. Hubert Hinzen

Dozent an der Fachhochschule Trier, Fachbereich Technik

Oldenbourg Verlag München Wien Vers. 1.0

Lösungen zu Kapitel 3 „Verbindungselemente und Verbindungstechniken“

Lösungen:
Verbindungselemente und Verbindungstechniken

Nieten

A.3.1 Lastverteilung Nietverbindung

Lastverteilung

In den Fällen A, B, D und E verläuft die Wirkungslinie der angreifenden Kraft durch den Schwerpunkt der Nietverbindung. Da dabei kein Moment um den Schwerpunkt der Nietverbindung entsteht, verteilt sich die angreifende Kraft zu gleichen Teilen auf die beiden Nieten.

Im Fall C verteilt sich die angreifende Kraft zunächst einmal ebenfalls zu gleichen Teilen auf die beiden Nieten (Anteil q) in horizontaler Richtung. Zusätzlich entsteht aber eine Moment um den Schwerpunkt der Nietverbindung 20.000 N * 100 mm, welches sich auf beide Nieten in vertikaler Richtung mit jeweils 10.000 N abstützt (Anteil m). Die Vektorsumme aus den Anteilen q und m beträgt = 14.140 N.

Im Fall F verteilt sich die angreifende Kraft zunächst einmal ebenfalls zu gleichen Teilen auf die beiden Nieten (Anteil q) in vertikaler Richtung nach unten:

Fq = -10.000 N

Zusätzlich entsteht um den Schwerpunkt der Nietverbindung das Moment

M = 20.000 N * 200 mm = 4.000 Nm

Dieses Moment wird auf die beiden Nieten abgestützt:

M = 2 * Fm * 100 mm 

für Niet 1 negativ, für Niet 2 positiv

Alle Kräfte wirken in vertikaler Richtung

FNiet1 = - 10.000 N – 20.000 N = - 30.000 N

FNiet2 = - 10.000 N + 20.000 N = - 10.000 N

|  | A | B | C | D | E | F |
| --- | --- | --- | --- | --- | --- | --- |
| FNiet1 [N] | 10 000 | 10 000 | 14 140 | 10 000 | 10 000 | 30 000 |
| FNiet2 [N] | 10 000 | 10 000 | 14 140 | 10 000 | 10 000 | 10 000 |

Dimensionierung des Niets

|  [N/mm²] | 96 |
| --- | --- |
| p [N/mm²] | 100 |

A.3.2 Achshalter Güterwaggon

1. Fq = = 2200N (nur in x-Richtung)

Moment um den Schwerpunkt eingeleitet:

M = = 4928Nm

Moment um den Schwerpunkt abgestützt:

M = 4 * Fm * h

h: Abstand zwischen Schwerpunkt und Niet

aus den geometrischen Abmessungen gewinnt man:

Fm = = 7695N

für die Zerlegung von Fm in x- und y-Komponente wird der Winkel  benötigt, der sich trigonometrisch aus der Lage der Nieten ergibt:

  = 64,1°

Fmx = 7695N * cos64,1° = 3361N und Fmy = 7695N * sin64,1° = 6922N

FNiet = = 8 882 N

b. Q = = 28,2 N/mm²

c. pL = = 37,0 N/mm²

A.3.3 Verbindungslasche I-Träger

 ; (Vorzeichen laut Schema)

Moment eingeleitet (für beide Verbindungen gleich):

Moment abgestützt (für beide Verbindungen unterschiedlich):

links: Hebelarm:



jeweils senkrecht zum Hebelarm

Fmx = Fm * cos 45° = 1090 N * cos 45° = 771 N

Fmy = Fm * sin 45° = 1090 N * sin 45° = 771 N

(Vorzeichen laut Schema)

rechts: Hebelarm:



jeweils senkrecht zum Hebelarm

|  | linke Verbindung | | | rechte Verbindung | | |
| --- | --- | --- | --- | --- | --- | --- |
|  | Fq = 450  Fqx = - 450  Fqy = 0 |  | Fq = 450  Fqx = - 450  Fqy = 0 |  | Fq = 450  Fqx = 450  Fqy = 0 |  |
|  | Fm = 1090  Fmx = 771  Fmy = 771 |  | Fm = 1090  Fmx = 771  Fmy = - 771 |  | Fm = 1541  Fmx = - 1541  Fmy = 0 |  |
|  | FNiet = 835 |  | FNiet = 835 |  | FNiet = 1091 |  |
|  |  |  |  | Fq = 450  Fqx = 450  Fqy = 0 |  | Fq = 450  Fqx = 450  Fqy = 0 |
|  |  |  |  | Fm = 1541  Fmx = 0  Fmy = - 1541 |  | Fm = 1541  Fmx = 0  Fmy = 1541 |
|  |  |  |  | FNiet =1605 |  | FNiet =1605 |
|  | Fq = 450  Fqx = - 450  Fqy = 0 |  | Fq = 450  Fqx = - 450  Fqy = 0 |  | Fq = 450  Fqx = 450  Fqy = 0 |  |
|  | Fm = 1090  Fmx = - 771  Fmy = 771 |  | Fm = 1090  Fmx = - 771  Fmy = - 771 |  | Fm = 1541  Fmx = 1541  Fmy = 0 |  |
|  | FNiet = 1444 |  | FNiet = 1444 |  | FNiet = 1991 |  |

b. siehe a.

c. Schubspannung: 

Lochleibung: 

linke Verbindung: Schubspannung:

Lochleibung:

rechte Verbindung: Schubspannung:

Lochleibung:

Die Belastbarkeit der linken Verbindung wird durch Querkraftschub begrenzt, die der rechten Verbindung durch Lochleibung.

|  | dmin für linke Verbindung: 3,2 mm | dmin für rechte Verbindung: 4,2 mm |
| --- | --- | --- |

A.3.4 Lastverteilung auf zwei Nietgruppen

Die Last wird „hintereinander“ zunächst von der Nietgruppe I und dann von der Nietgruppe II übertragen. Innerhalb jeder Nietgruppe ist das Problem der Lastverteilung separat zu lösen.

Nietgruppe I:

Querkraftbedingte Belastung für den einzelnen Niet:

im Betrag und in der Richtung für alle Nieten gleich

Moment eingeleitet:

Abstände der einzelnen Nieten zum Schwerpunkt der Nietverbindung:

Abstützung des Momentes, momentenbedingte Belastung für den einzelnen Niet:

für Niet 1, 4, 5 und 8:

für Niet 2, 3, 6 und 7:

Der Winkel , der für die Zerlegung von Fm in x- und y-Komponente erforderlich ist, ergibt sich aus der Geometrie der Nietanordnung:

für Nieten 1, 4, 5 und 8:

für Nieten 2, 3, 6 und 7:

Zerlegung der momentenbedingten Kraft in in x- und y-Komponente:

für Niet 1, 4, 5 und 8:

Fmx1458 = Fm1458 * sin 1458 = 8.145 N * sin 18,43° = 2.575 N

Fmy1458 = Fm1458 * cos 1458 = 8.145 N * cos 18,43° = 7.727 N

für Niet 2, 3, 6 und 7:

Fmx2367 = Fm2367 * sin 2367 = 3.639 N * sin 45,00° = 2.573 N

Fmy2367 = Fm2367 * cos 2367 = 3.639 N * cos 45,00° = 2.573 N

|  | Niet 1: | Niet 2: | Niet 3: | Niet 4: |
| --- | --- | --- | --- | --- |
| Fqx [N]  Fqy [N]  Fmx [N]  Fmy [N] | 0  -662  2.575  7.727 | 0  -662  2.573  2.573 | 0  -662  2.573  -2.573 | 0  -662  2.575  -7.727 |
| **FNiet [N]** | 7.960 | 3.205 | 4.133 | 8.377 |
|  | Niet 5: | Niet 6: | Niet 7: | Niet 8: |
| Fqx [N]  Fqy [N]  Fmx [N]  Fmy [N] | 0  -662  -2.575  7.727 | 0  -662  -2.573  2.573 | 0  -662  -2.573  -2.573 | 0  -662  -2.575  -7.727 |
| **FNiet [N]** | 7.960 | 3.205 | 4.133 | 8.377 |

Nietgruppe II:

Querkraftbedingte Belastung für den einzelnen Niet:

im Betrag und in der Richtung für alle Nieten gleich

Moment eingeleitet:

Abstützung des Momentes, momentenbedingte Belastung für den einzelnen Niet:

für Niet 1 und 6:

für Niet 2 und 5:

für Niet 3 und 4:

|  | Niet 1: |  |  | Niet 4: |
| --- | --- | --- | --- | --- |
| Fqx [N]  Fqy [N]  Fmx [N]  Fmy [N] | 0  -883  10.852  0 |  | Fqx [N]  Fqy [N]  Fmx [N]  Fmy [N] | 0  -883  -2.170  0 |
| **FNiet [N]** | 10.888 |  | **FNiet [N]** | 2.343 |
|  | Niet 2: |  |  | Niet 5: |
| Fqx [N]  Fqy [N]  Fmx [N]  Fmy [N] | 0  -883  6.511  0 |  | Fqx [N]  Fqy [N]  Fmx [N]  Fmy [N] | 0  -883  -6.511  0 |
| **FNiet [N]** | 6.571 |  | **FNiet [N]** | 6.571 |
|  | Niet 3: |  |  | Niet 6: |
| Fqx [N]  Fqy [N]  Fmx [N]  Fmy [N] | 0  -883  2.170  0 |  | Fqx [N]  Fqy [N]  Fmx [N]  Fmy [N] | 0  -883  -10.852  0 |
| **FNiet [N]** | 2.343 |  | **FNiet [N]** | 10.888 |

Löten

A.3.5 Verlötete Rohrverbindung

1. Lötfuge nur stirnseitig



1. Lötfuge nur an der Mantelfläche

Fu: fiktive Umfangskraft an der Zylindermantelfläche

c. Stirnfläche und Mantelfläche weisen den gleichen Randfaserabstand auf, deshalb können die beiden zuvor ermittelten übertragbaren Torsionsmomente addiert werden:

Mtmax = 414,2 Nm + 1413,7 Nm = 1.827,9 Nm

1. Rechnung wie die Umfangskraft unter b., die Kraft wird lediglich nicht in Umfangs- sondern in Axialrichtung wirksam:

FL = Fumax = 56549 N

e. Der Rohrinnendruck erzeugt über dem Rohrinnendurchmesser eine Axialkraft, die sich als Längskraft wie unter d. abstützt:

A.3.5 Verlötete Rohrverbindung

**Muffe**

**Lötverbindung**

Die lastübertragende Lötfläche kann vereinfachend als Mantelfläche eines Kreiszylinders angenommen werden, die rechteckförmig abgewickelt wird: Die eine Seite des Rechtecks ist der Umfang des Kreises und die andere 45 mm – 15,5/2 mm. Ähnliche Ansätze können ebenfalls sinnvoll sein.

Daraus ergibt sich die folgende in der Lötfläche zulässige Schubkraft:

Diese Kraft kann in Längsrichtung, also als Zugkraft übertragen werden. Diese Kraft kann aber auch in Umfangsrichtung zugelassen werden, wobei das maximale Moment übertragen werden kann:

|  | Fmax [N] | Mtmax [Nm] |
| --- | --- | --- |
| Muffe | 38485 | 374 |
| Lötverbindung | 79.577 | 1.353 |

Kleben

A.3.7 Aufgeklebte Lasche

a.  = 0° weil reiner Querkraftschub ohne zusätzliche Momentenbelastung

zul =  Fmax = zul * A = 15 N/mm² * 30 mm * 40 mm = 18.000 N

b.  = 90°  Querkraftschub und Torsionsschub

und

Wpol = Ky * h * b²  Ky = 0,223

Wpol = 0,223 * 40 mm (30 mm)² = 8.028 mm³

ges = Q + t = Fmax *

- Fmax = = 2.579 N
