# Supplementary material
Source: publisher site journal article supplement (https://www.degruyterbrill.com/publication/isbn/9783110692143/downloadAsset/9783110692143_Zusatzmaterial_Basiswissen.zip)
Supplement: Supplementary file 21 [file Basiswissen 1. Auflage, Lösungen Kap. 4.doc]

Basiswissen Maschinenelemente
Lösungen

von
Prof. Dr.-Ing. Hubert Hinzen

Dozent an der Fachhochschule Trier, Fachbereich Technik

Oldenbourg Verlag München Wien Vers. 1.0

Lösungen zu Kapitel 4 „Schrauben“

Lösungen: Schrauben

Befestigungsschrauben

Vorspannen von Schraubverbindungen

A.4.1 Winkelgesteuertes Anziehen

a. für M8:

für M10:

für M12:

b.

für M8:

für M10:

für M12:

Kopfreibungsmoment: MKR = FV * µK * rK mit

für M8: MKR = 18 kN * 0,12 * 5,5 mm = 11,88 Nm

für M10: MKR = 18 kN * 0,12 * 7,00 mm = 15,12 Nm

für M12: MKR = 18 kN * 0,12 * 8,00 mm = 17,28 Nm

Mgesanz = MGewanz + MKR Mgeslös = MGewlös + MKR

c.  und 

d. Gleichung 4.30, S. 344

für M8:

für M10:

für M12:

e.

|  |  | M8 | M10 | M12 |
| --- | --- | --- | --- | --- |
| cS | [N/µm] | 96,1 | 152,2 | 221,3 |
| MGewanz | [Nm] | 12,64 | 15,67 | 18,70 |
| MGewlös | [Nm] | 5,34 | 6,91 | 8,47 |
| MKR | [Nm] | 11,88 | 15,12 | 17,28 |
| Mgesanz | [Nm] | 24,52 | 30,79 | 35,98 |
| Mgeslös | [Nm] | 17,22 | 22,03 | 25,75 |
| fSV | [µm] | 187 | 118 | 81 |
| fZV | [µm] | 28 | 28 | 28 |
|  | [°] | 62 | 35 | 22 |
| Z | [N/mm²] | 492 | 310 | 213 |
| t | [N/mm²] | 202 | 126 | 86 |
| V | [N/mm²] | 604 | 379 | 260 |
| Schraubengüte | | 8.8 | 5.8 | 4.8 |

Das winkelgesteuerte Anziehen der Schraube setzt voraus, daß der Übergang zwischen dem momentenlosen Eindrehen der Schraube und dem Anziehen mit steigendem Moment eindeutig festgestellt werden kann, so daß der Nullpunkt des Winkels  genau markiert werden kann. Dies wiederum erfordert eine optimale Oberfläche an den im Verspannungsfluß liegenden Flächen, was die Anwendungsmöglichkeit dieses Anzugsverfahrens stark einschränkt.

A.4.2 Verschraubung stromführender Leiterbahnen

Nachtrag zur Aufgabenstellung: In der dritten Zeile muß es anstatt „M12“ wie in der Zeichnung angegeben „M10“ heißen.

Aufgabenteil a

Aufgabenteil b

fV wird durch die Wärmeausdehnung der kupfernen Zwischenlage hervorgerufen:

fV = L * Cu *  = 20 mm * 16 * 10-6/°C *120°C = 38,4 µm

Der verformbare Abschnitt der Schraube besteht aus einem Schaftanteil und einem Gewindeanteil. Die Steifigkeit der Schraube müßte also als eine Hintereinanderschaltung beider Anteile betrachtet werden. Da aber die Aufteilung der Klemmlänge in diese beiden Anteile nicht bekannt ist, wird sicherheitshalber mit der höheren Steifigkeit, also mit dem Nennquerschnitt gerechnet:

AZ = 1,2 * A 

dadurch hervorgerufene zusätzliche Zugspannung:

Aufgabenteil c

fV = L * (Cu - St) *  = 20 mm * (16 – 11) * 10-6/°C *120°C = 12 µm

dadurch hervorgerufene zusätzliche Zugspannung:

|  | Aufgabenteil a | Aufgabenteil b | Aufgabenteil c |
| --- | --- | --- | --- |
| Zwischenlage | 20°C | 140°C | 140°C |
| Schraube | 20°C | 20°C | 140°C |
| Z [N/mm²] = | 594 | 594 + 211 = 805 | 594 + 66 = 660 |
| t [N/mm²] = | 241 | 241 | 241 |
| V [N/mm²] = | 726 | 906 | 781 |

Querkraftbeanspruchte Schraubverbindungen

A.4.3 Wellenflansch mit einem Teilkreis

P = M *  mit

Dieses Moment stützt sich auf 4 Schrauben mit dem Hebelarm 128/2 mm ab:



a. Gl. 3.3

Gl. 3.1

|  | Lochleibungsdruck | pL [N/mm²] | 12,2 |
| --- | --- | --- | --- |
|  | Querkraftschub | Q [N/mm²] | 27,9 |

b. Gl. 4.40

Gl. 4.12

Gl. 4.11

= MKA

Manz = MGew + MKA = 2 * 22,6 Nm = 45,2 Nm

Schema S. 148

| Vorspannkraft | FV [N] | 21.940 |
| --- | --- | --- |
| Gewindemoment | MGew [Nm] | 22,6 |
| Kopfreibungsmoment | MKA [Nm] | 22,6 |
| Schraubenanzugsmoment | Manz [Nm] | 45,2 |
| Zugspannung | Z [N/mm²] | 378 |
| Torsionsschub | t [N/mm²] | 181 |
| Vergleichsspannung | V [N/mm²] | 492 |

A.4.4 Wellenflansch mit drei Teilkreisen

a. äußerer Lochkreis:

mittlerer Lochkreis:

Die Umfangskraft am mittleren Lochkreis Fum wird **nicht** durch den Reibschluß begrenzt, sondern es kann nur soviel Kraft übertragen werden wie es die gemeinsame Verdrehung mit dem äußeren Lochkreis zuläßt

innerer Lochkreis:

MtWelle = Mta + Mtm + Mti = 576 Nm + 324 Nm + 72 Nm = 972 Nm

1. Am äußeren Lochkreis wird die übertragbare Umfangskraft durch den Reibschluß begrenzt, deshalb muß dort die Vorspannung erhalten bleiben:

FVmina = 12000 N

Für die weiter innen liegenden Lochkreise ist die Vorspannkraft unnötig hoch. Sie kann entsprechend dem Abstand zum Schwerpunkt der Schraubverbindung reduziert werden:

mittlerer Lochkreis:

innerer Lochkreis:

äußerer Lochkreis: MGew = 5,658 Nm

mittlerer Lochkreis: MGew = 4,244 Nm

innerer Lochkreis: MGew = 2,829 Nm

d.

äußerer Lochkreis:

mittlerer Lochkreis:

innerer Lochkreis:

e. Manz = 2 * MGew

|  |  |  | innerer  Lochkreis | mittlerer  Lochkreis | äußerer  Lochkreis | gesamt |
| --- | --- | --- | --- | --- | --- | --- |
| a | MtWelle | [Nm] | 72 | 324 | 576 | 972 |
| b | FVmin | [N] | 6.000 | 9.000 | 12.000 |  |
| c | MGew | [Nm] | 2,829 | 4,244 | 5,658 |  |
|  | Z | [N/mm²] | 299 | 448 | 597 |  |
|  | t | [N/mm²] | 111 | 167 | 222 |  |
| d | V | [N/mm²] | 355 | 533 | 711 |  |
|  | Schrau-bengüte |  | 6.8 | 8.8 | 10.9 |  |
| e | Manz | [Nm] | 5,658 | 8,488 | 11,316 |  |

Längskraftbeanspruchte Schraubverbindungen

A.4.5 Betriebskraft im Verspannungsschaubild

rechnerische Lösung:

Gl. 4.46

FSmax = FV + FBS = 120 kN + 20 kN = 140 kN

FRK = FSmax – FBL = 140 kN – 80 kN = 60 kN



|  | FSmax [kN] | FRK [kN] | fB [µm] |
| --- | --- | --- | --- |
| zeichnerisch | 140 | 60 | 10 |
| rechnerisch | 140 | 60 | 10 |

A.4.6 Druckbehälter statisch belastet

b. Gl. 4.25

c. z: Anzahl der Schrauben

p = 24 bar = 24 * 105 N/m² und

FRK = 0,25 * FBL =8.490 N Vorgabe der Aufgabenstellung

FSmax = FBL + FRK = 42.450 N vgl. Bild 4.21

Gl. 4.47

d. MGew = Gl. 4.12

Gl. 4.11

MGew =

Gl. 4.14

Manz = MGew + MKR = 28,47 Nm + 27,45 Nm = 55,92 Nm Gl. 4.15

e. nach Schema S. 148

V =

f. Schraubengüte 10.9  zul = 0,9 * 1.000 N/mm² = 900 N/mm²

Festigkeit ausreichend

A.4.7 Rohrleitungsflansch

In der Aufgabenstellung muß der Satz

„Es kann weiterhin angenommen werden, dass das Anzugsmoment so groß ist wie das Gewindemoment“

ersetzt werden durch

„Es kann weiterhin angenommen werden, dass das Anzugsmoment **doppelt** so groß ist wie das Gewindemoment“

Aufgabenteil a:

Kräfte für die gesamte Schraubverbindung:

Kraft für die einzelne Schraube:

FRK = 3 * FBL = 3.534N

FSmax = FRK + FBL = 3.534 N + 1.178 N = 4.721 N

Aufgabenteil b:

MKR = MGew = 3,58 Nm

Manz = MGew + MKR = 3,58 Nm + 3,58 Nm = 7,17 Nm

Aufgabenteil c:

V =

Schraubengüte 3.6 mit zul = 180 N/mm²

Aufgabenteil d:

Schraubengüte 12.9 mit zul = 1.080 N/mm²



| Aufgabenteil a | | | Aufgabenteil b | | |
| --- | --- | --- | --- | --- | --- |
| FBL | [N] | 1.178 | MGew | [Nm] | 3,58 |
| FRK | [N] | 3.534 | MKR | [Nm] | 3,58 |
| FSmax | [N] | 4.721 | Manz | [Nm] | 7,17 |
| FV | [N] | 4.319 |  |  |  |

| Aufgabenteil c | Aufgabenteil d |
| --- | --- |
| **3.6** – 4.6 – 5.6 – 5.8 – 6.8 – 8.8 – 10.9 – 12.9 | pmax [bar] = 79,5 |
