# Supplementary material
Source: publisher site journal article supplement (https://www.degruyterbrill.com/publication/isbn/9783110692143/downloadAsset/9783110692143_Zusatzmaterial_Basiswissen.zip)
Supplement: Supplementary file 23 [file Basiswissen 1. Auflage, Lösungen Kap. 6.doc]

Basiswissen Maschinenelemente
Lösungen

von
Prof. Dr.-Ing. Hubert Hinzen

Dozent an der Fachhochschule Trier, Fachbereich Technik

Oldenbourg Verlag München Wien Vers. 1.0

Lösungen zu Kapitel 6 „Welle-Nabe-Verbindungen“

Lösungen:
Welle-Nabe-Verbindungen

Formschluß

A.6.1 Vergleich formschlüssiger Welle-Nabe-Verbindungen

Paßfederverbindung:

wellenseitig: Umax = pzul * A *  = pzul * t1 * L *  = 60 N/mm² * 5 mm * 32 mm = 9,60 kN

nabenseitig: Umax = pzul * A *  = pzul * t2 * L *  = 60 N/mm² * 3,3 mm * 32 mm = 6,34 kN

Keilwellenverbindung leichte Reihe:

Keilwellenverbindung mittlere Reihe:

Keilwellenverbindung schwere Reihe:

|  | Mtmax [Nm] |
| --- | --- |
| Paßfederverbindung DIN 6885 | 126,8 |
| Keilwellenverbindung DIN ISO 14 leichte Reihe | 437,8 |
| Keilwellenverbindung DIN ISO 14 mittlere Reihe | 604,8 |
| Keilwellenverbindung DIN 5464 schwere Reihe | 756,0 |

Kraftschluß: Klemmverbindungen

Axialklemmverbindungen

A.6.2 Hilfsantrieb I

1. Bild 6.13, rechte Dreieckseite: Mtmax = µ * p * (ra² - ri²) *  *rm

schmaler Kreisring:

breiter Kreisring:

kein praktisch relevanter Unterschied der beiden Ansätze

b) Bild 6.13, untere Dreieckseite:

Axialkraft wird erzielt über einen Federvorspannweg:



(Feder muß um 3,77 mm vorgespannt werden)

axialer Überstand = 6 mm –3,77 mm = 2,23 mm

Radialklemmverbindungen

A.6.3 Schalenkupplung

Die dargestellte Schalenkupplung setzt sich aus zwei hintereinandergeschalteten radialen Klemmverbindungen zusammen: In der linken Kupplungshälfte wird das Moment von der linken Welle auf die Kupplung übertragen und in der rechten Kupplungshälfte wird das Moment von der Kupplung auf die rechte Welle übertragen.

a) Die Schraube wird auf Zug und Torsion beansprucht (vgl. S. 148):

mit

b) Mtmax = 3,14 * µ * d * i * FV

c)

| d) |  | ja | nein |
| --- | --- | --- | --- |
|  | Verwendung von Schrauben höherer Festigkeit | X |  |
|  | Verwendung einer Nabe höherer Festigkeit |  | X |
|  | Verwendung von Schrauben größeren Durchmessers | X |  |
|  | Erhöhung der Schraubenanzahl | X |  |
|  | Verwendung einer Welle höherer Festigkeit |  | X |

A.6.4 Variation der Ansätze

Sämtliche hier benutzten Gleichungen sind in Bild 6.12 zusammengestellt.

1. Dimensionierung nach der **zulässigen Pressung**:

„biegesteife“ Nabe:

Mtmax = 1,57 * L * d² * µ * pzul

Mtmax = 1,57 * mm * (50mm)² * 0,1 * 60 N/mm² = 1154 Nm

„biegeweiche“ Nabe:

Mtmax = L * d² * µ * pzul = mm * (50mm)² * 0,1 * 60 N/mm² = 735 Nm

|  |  | Annahme  „biegesteife Nabe“ | Annahme  „biegeweiche Nabe“ |
| --- | --- | --- | --- |
|  | **pmax = pzul [N/mm²]** | **60** | **60** |
|  | Mt [Nm] | 1154 | 735 |
|  | FV [kN] | 49,0 | 38,4 |

1. Dimensionierung nach dem zu **übertragenden Moment**:

„biegesteife“ Nabe:

„biegeweiche“ Nabe:

|  |  | Annahme  „biegesteife Nabe“ | Annahme  „biegeweiche Nabe“ |
| --- | --- | --- | --- |
|  | pmax [N/mm²] | 41,6 | 65,2 |
|  | **Mt [Nm]** | **800** | **800** |
|  | FV [kN] | 34,0 | 41,8 |

1. Dimensionierung nach dem zu **maximalen Schraubenvorspannkraft**:

„biegesteife“ Nabe:

Mtmax = 3,14 *µ * d * i * FV = 3,14 * 0,1 * 50mm * 1,5 * 44kN = 1037 Nm

„biegeweiche“ Nabe:

Mtmax = 2,55 *µ * d * i * FV = 2,55 * 0,1 * 50mm * 1,5 * 44 kN = 841 Nm

|  |  | Annahme  „biegesteife Nabe“ | Annahme  „biegeweiche Nabe“ |
| --- | --- | --- | --- |
|  | pmax [N/mm²] | 55,4 | 68,8 |
|  | Mt [Nm] | 1037 | 841 |
|  | **FV = FVmax [kN]** | **44** | **44** |

Kraftschluß: Zylinderpreßverband

Erforderliche Mindestpressung

A.6.5 Erforderliche Pressung bei Torsions- und Längskraftbelastung

a. Fax = 10 kN  21,8 N/mm²

b. Mt = 500 Nm  = 57,4 N/mm²

c. Fax = 10 kN und Mt = 500 Nm

 = 61,4 N/mm²

A.6.6 Erforderlicher Durchmesser bei Torsions- und Längskraftbelastung

a. Axialkraft wird formschlüssig abgestützt,

nur das Torsionsmoment belastet den Reibschluß

L = 0,9 * d

d = 46,96 mm  L = 42,27 mm

1. Axialkraft und Torsionsmoment belasten den Reibschluß

L = 0,9 * d

Auflösen der Gleichung nach d problematisch

daher Umstellung der Gleichung und Iteration;

Reibwert µ = 0,08 soll vollständig ausgenutzt werden

Iterationsanfang beispielsweise d = 47mm wie unter a.

d = 47 mm  Fres/FN = 0,125  µ = 0,08 rutscht  d vergrößern

d = 50 mm  Fres/FN = 0,108  µ = 0,08 rutscht  d vergrößern

d = 55 mm  Fres/FN = 0,086  µ = 0,08 rutscht  d vergrößern

d = 58 mm  Fres/FN = 0,076  µ = 0,08 hält  d verkleinern

d = 56 mm  Fres/FN = 0,082  µ = 0,08 rutscht  d vergrößern

d = 57 mm  Fres/FN = 0,079  µ = 0,08 hält  d verkleinern

 d = 57 mm; L = 51,3 mm, aufgerundet: L = 52 mm
