# Supplementary material
Source: publisher site journal article supplement (https://www.degruyterbrill.com/publication/isbn/9783110692143/downloadAsset/9783110692143_Zusatzmaterial_Basiswissen.zip)
Supplement: Supplementary file 26 [file Basiswissen 2. Auflage, Lösungen Kap. 1.doc]

Basiswissen Maschinenelemente
Lösungen

2. Auflage

von
Prof. Dr.-Ing. Hubert Hinzen

Hochschule Trier, Fachbereich Technik

Oldenbourg Verlag München Wien Vers. 1.0

Lösungen zu Kapitel 1 „Achsen, Wellen, Betriebsfestigkeit“

Lösungen:
Achsen, Wellen, Betriebsfestigkeit

Zusammengesetzte Spannungen

A.1.1 Transporteinrichtung mit Laufkatze

O höchste Belastung am oberen Ende des Trägers

O höchste Belastung am unteren Ende des Trägers

 das obere und untere Ende des Trägers erfahren die gleiche Belastung

Gewichtskraft: Gl. 0.1

Zugspannung: Gl. 0.20 für alle Stellungen

Biegespannung: für x = 0

für x = 200 mm

für x = 400 mm

Gesamtspannung:

Gl. 1.1 für x = 0

für x = 200 mm

für x = 400 mm

|  | für x = 0 | für x = 200 mm | für x = 400 mm |
| --- | --- | --- | --- |
| Z [N/mm²] | 12,1 | 12,1 | 12,1 |
| b [N/mm²] | 0 | 69,8 | 139,7 |
|  |  |  |  |
| ges [N/mm²] | 12,1 | 81,9 | 151,8 |

| xmax [mm] | 309 |
| --- | --- |

Quasistatische Vergleichsspannung

A.1.2 Kran mit I-Trägern

Gewichtskraft: G = m * g = 8.000 kg * 9,81 m/s² = 78.480 N

Winkel des schräg ansteigenden Seils gegenüber der Horizontalen:

Kraft am Mittelpunkt der Seilscheibe:

Fresx = G * cos  = 78.480 N * cos 14,26° = 76.062 N

Fresy = G * (1 - sin ) = 78.480 N * (1 – sin 14,26°) = 59.149 N

L = Fresx = 76.062 N

Q = Fresy = 59.149 N

Mb = Fresy * L = 59.149 N * 3.140 mm = 185.728 Nm

Gl. 1.3 und 1.4

| L [N] = 76.062  Q [N] = 59.149  Mb [Nm] =185.728 | ZD [N/mm²] = 7,1  Q [N/mm²] = 5,5  b [N/mm²] = 210,1 |
| --- | --- |
|  | v [N/mm²] = 217,4 |

A.1.3 Bohrrohr für Erdbohrungen

einwandiges Rohr:

mit Bild 0.25

Gl. 1.3

doppelwandiges Rohr:

Die Widerstandsmomente der beiden Rohre dürfen nicht addiert werden, weil ihre Randfaserabstände unterschiedlich sind. Zur Ermittlung des Gesamtwiderstandsmomentes muss zunächst das Flächenmoment berechnet werden:

Gl. 0.56

|  |  | einwandiges Rohr | doppelwandiges Rohr |  |  |
| --- | --- | --- | --- | --- | --- |
| Mt | [kNm] | 360 | 585 | [kNm] | Mt |
| FD | [kN] | 300 | 490 | [kN] | FD |
| D | [mm] | 368 | 600 | [mm] | Da |
| d | [mm] | 333 | 576 | [mm] | da |
|  |  |  | 536 | [mm] | Di |
|  |  |  | 520 | [mm] | di |
| A | [mm²] | 19,27*103 | 35,44*103 | [mm²] | A |
| Wpol | [mm³] | 3,224*106 | 9,473*106 | [mm³] | Wpol |
| D | [N/mm²] | 15,57 | 13,83 | [N/mm²] | D |
| t | [N/mm²] | 111,7 | 61,75 | [N/mm²] | t |
| V | [N/mm²] | 194,1 | 107,9 | [N/mm²] | V |

Unterscheidung statische-dynamische Spannung

A.1.4 Wagenachse

a. Biegemoment am Rad gleich null, an der Abstützung am Wagen Maximalwert, zwischen den beiden Abstützpunkten konstant

b. Mbmax = = 135,5 Nm

c.

d.

A.1.5 Belastung von Achsen und Wellen

Sämtliche im Rahmen dieser Aufgabe betrachteten Achsen und Wellen weisen den Durchmesser von 20 mm auf, so daß sowohl die Querschnittsfläche als auch das axiale und polare Widerstandsmoment vorab berechnet werden können:

nach Bild 0.19

nach Gl. 0.55 bzw. Bild 0.25

a. Stillstehende Achse

Gl. 0.39

Gl. 0.32

Gl. 1.3

|  | L [N] = 0  Q [N] = 490,5  Mb [Nm] = 24,53  Mt [Nm] = 0 | ZD [N/mm²] = 0  Q [N/mm²] = 1,6  b [N/mm²] = 31,2  t [N/mm²] = 0 |
| --- | --- | --- |
|  |  | v [N/mm²] = 31,3 |

b. Stillstehende Welle mit doppelarmigem Hebel

Torsion wird querkraft- und biegemomentenfrei eingeleitet

Gl. 0.54

|  | L [N] = 0  Q [N] = 0  Mb [Nm] = 0  Mt [Nm] = 49,0 | ZD [N/mm²] = 0  Q [N/mm²] = 0  b [N/mm²] = 0  t [N/mm²] = 31,2 |
| --- | --- | --- |
|  |  | v [N/mm²] = 54,0 |

c. Stillstehende Welle mit einarmigem Hebel

Q, Q, Mb und b wie unter a.

t wie unter b.

|  | L [N] = 0  Q [N] = 490,5  Mb [Nm] = 24,53  Mt [Nm] = 49,0 | ZD [N/mm²] = 0  Q [N/mm²] = 1,6  b [N/mm²] = 31,2  t [N/mm²] = 31,2 |
| --- | --- | --- |
|  |  | v [N/mm²] = 64,8 |

d. Drehende Welle mit einarmigem Hebel

 = 0° wie c.

 = 90° wie a.

 = 180° wie bei  = 0°

 = 270° wie bei  = 90°

|  |  = 0° |  = 90° |  = 180° |  = 270° |
| --- | --- | --- | --- | --- |
| Q [N] | 490,5 | 490,5 | 490,5 | 490,5 |
| Q [N/mm²] | 1,6 | 1,6 | 1,6 | 1,6 |
| Mb [Nm] | 24,53 | 24,53 | 24,53 | 24,53 |
| b [N/mm²] | 31,2 | 31,2 | 31,2 | 31,2 |
| Mt [Nm] | 49,0 | 0 | 49,0 | 0 |
| t [N/mm²] | 31,2 | 0 | 31,2 | 0 |
|  |  |  |  |  |
| V [N/mm²] | 64,8 | 31,3 | 64,8 | 31,3 |

e. Welle mit Zahnriemenscheibe

Q wie unter a.; Q dynamisch, weil sich die Welle unter der raumfesten Last hinwegdreht

Mb wie unter c.; b dynamisch wegen Umlaufbiegung

Mt wie unter c.; t statisch, weil von der Winkelstellung unabhängig

|  |  | statisch | dynamisch |
| --- | --- | --- | --- |
|  | L [N] = 0 | ZDstat [N/mm²] = 0 | ZDdyn [N/mm²] = 0 |
|  | Q [N] = 490,5 | Qstat [N/mm²] = 0 | Qdyn [N/mm²] = 1,6 |
|  | Mb [Nm] = 24,53 | bstat [N/mm²] = 0 | bdyn [N/mm²] = 31,2 |
|  | Mt [Nm] = 49,0 | tstat [N/mm²] = 31,2 | tdyn [N/mm²] = 0 |
|  |  | vstat [N/mm²] = 54,0 | vdyn [N/mm²] = 31,3 |

f. Senkrechte Achse mit einarmigem Hebel

Die Masse ist sowohl der Erdbeschleunigung als auch einer Zentrifugalbeschleunigung ausgesetzt:

Das Biegemoment setzt sich aus der Längskraft am Hebelarm 100 mm und der Zentrifugalkraft am Hebelarm 50 mm zusammen:

sämtliche Belastungen statisch, da Belastung und Welle stets in gleicher Phasenlage

|  |  | statisch | dynamisch |
| --- | --- | --- | --- |
|  | L [N] = 490,5 | ZDstat [N/mm²] = 1,6 | ZDdyn [N/mm²] = 0 |
|  | Q [N] = 548,3 | Qstat [N/mm²] = 1,7 | Qdyn [N/mm²] = 0 |
|  | Mb [Nm] = 76,47 | bstat [N/mm²] = 97,4 | bdyn [N/mm²] = 0 |
|  | Mt [Nm] = 0 | tstat [N/mm²] = 0 | tdyn [N/mm²] = 0 |
|  |  | vstat [N/mm²] = 99,0 | vdyn [N/mm²] = 0 |

A.1.6 Welle Kettentrieb

Gl. 0.63

→ Gl. 0.62

Kettenkräfte:

linkes Kettenrad:

rechtes Kettenrad:

Querkraftschub:

linkes Kettenrad:

rechtes Kettenrad:

Biegung:

am linken Lager: Mblinks = Qlinks * 26 mm = 678,6 N * 26 mm = 17,64 Nm

am rechten Lager: Mbrechts = Qrechts * 26 mm = 2.035,7N * 26 mm = 52,93 Nm

Torsion:

an beiden Stellen:

Vergleichsspannung:

am linken Lager statisch:

am linken Lager dynamisch:

am rechten Lager statisch:

am rechten Lager dynamisch:

| linkes Lager | statisch | dynamisch |
| --- | --- | --- |
| L [N] = 0 | ZDstat [N/mm²] = 0 | ZDdyn [N/mm²] = 0 |
| Q [N] = 678,6 | Qstat [N/mm²] = 0 | Qdyn [N/mm²] = 2,2 |
| Mb [Nm] = 17,64 | bstat [N/mm²] = 0 | bdyn [N/mm²] = 22,5 |
| Mt [Nm] = 78,13 | tstat [N/mm²] = 49,7 | tdyn [N/mm²] = 0 |
|  | vstat [N/mm²] = 86,1 | vdyn [N/mm²] = 22,8 |

| rechtes Lager | statisch | dynamisch |
| --- | --- | --- |
| L [N] = 0 | ZDstat [N/mm²] = 0 | ZDdyn [N/mm²] = 0 |
| Q [N] = 2.035,7 | Qstat [N/mm²] = 0 | Qdyn [N/mm²] = 6,5 |
| Mb [Nm] = 52,93 | bstat [N/mm²] = 0 | bdyn [N/mm²] = 67,4 |
| Mt [Nm] = 78,13 | tstat [N/mm²] = 49,7 | tdyn [N/mm²] = 0 |
|  | vstat [N/mm²] = 86,1 | vdyn [N/mm²] = 68,3 |
