# Supplementary material
Source: publisher site journal article supplement (https://www.degruyterbrill.com/publication/isbn/9783110692143/downloadAsset/9783110692143_Zusatzmaterial_Basiswissen.zip)
Supplement: Supplementary file 29 [file Basiswissen 2. Auflage, Lösungen Kap. 4.doc]

Basiswissen Maschinenelemente
Lösungen

2. Auflage

von
Prof. Dr.-Ing. Hubert Hinzen

Hochschule Trier, Fachbereich Technik

Oldenbourg Verlag München Wien Vers. 1.0

Lösungen zu Kapitel 4 „Schrauben“

Lösungen: Schrauben

Befestigungsschrauben

Vorspannen von Schraubverbindungen

A.4.1 Winkelgesteuertes Anziehen

a. Gl. 4.24

für M8:

für M10:

für M12:

b. Gl. 4.12 und 4.13

Gl. 4.11

für M8:

für M10:

für M12:

MKR = FV * µK * rK mit Gl. 4.14

für M8: MKR = 18 kN * 0,12 * 5,5 mm = 11,88 Nm

für M10: MKR = 18 kN * 0,12 * 7,00 mm = 15,12 Nm

für M12: MKR = 18 kN * 0,12 * 8,00 mm = 17,28 Nm

Mgesanz = MGewanz + MKR Mgeslös = MGewlös + MKR

c.  Gl. 4.29

 Gl. 4.30

d. Gl. 4.28

für M8:

für M10:

für M12:

e.

|  |  | M8 | M10 | M12 |
| --- | --- | --- | --- | --- |
| cS | [N/µm] | 96,1 | 152,2 | 221,3 |
| MGewanz | [Nm] | 12,64 | 15,67 | 18,70 |
| MGewlös | [Nm] | 5,34 | 6,91 | 8,47 |
| MKR | [Nm] | 11,88 | 15,12 | 17,28 |
| Mgesanz | [Nm] | 24,52 | 30,79 | 35,98 |
| Mgeslös | [Nm] | 17,22 | 22,03 | 25,75 |
| fSV | [µm] | 187 | 118 | 81 |
| fZV | [µm] | 28 | 28 | 28 |
|  | [°] | 62 | 35 | 22 |
| Z | [N/mm²] | 492 | 310 | 213 |
| t | [N/mm²] | 202 | 126 | 86 |
| V | [N/mm²] | 604 | 379 | 260 |

Das winkelgesteuerte Anziehen der Schraube setzt voraus, daß der Übergang zwischen dem momentenlosen Eindrehen der Schraube und dem Anziehen mit steigendem Moment eindeutig festgestellt werden kann, so daß der Nullpunkt des Winkels  genau markiert werden kann. Dies wiederum erfordert eine optimale Oberfläche an den im Verspannungsfluss liegenden Flächen, was die Anwendungsmöglichkeit dieses Anzugsverfahrens stark einschränkt.

A.4.2 Verschraubung stromführender Leiterbahnen

Aufgabenteil a

Gl. 4.17

Gl. 4.11

Gl. 4.14

Aufgabenteil b

Gl. 4.36

fV wird durch die Wärmeausdehnung der kupfernen Zwischenlage hervorgerufen:

fV = L * Cu *  = 20 mm * 16 * 10-6/°C *120°C = 38,4 µm Gl. 4.37

Der verformbare Abschnitt der Schraube besteht aus einem Schaftanteil und einem Gewindeanteil. Die Steifigkeit der Schraube müßte also als eine Hintereinanderschaltung beider Anteile betrachtet werden. Da aber die Aufteilung der Klemmlänge in diese beiden Anteile nicht bekannt ist, wird sicherheitshalber mit der höheren Steifigkeit, also mit dem Nennquerschnitt gerechnet:

Gl. 4.24

AZ = 1,2 * A 

dadurch hervorgerufene zusätzliche Zugspannung:

Aufgabenteil c

fV = L * (Cu - St) *  = 20 mm * (16 – 11) * 10-6/°C *120°C = 12 µm

dadurch hervorgerufene zusätzliche Zugspannung:

|  | Aufgabenteil a | Aufgabenteil b | Aufgabenteil c |
| --- | --- | --- | --- |
| Zwischenlage | 20°C | 140°C | 140°C |
| Schraube | 20°C | 20°C | 140°C |
| Z [N/mm²] = | 594 | 594 + 211 = 805 | 594 + 66 = 660 |
| t [N/mm²] = | 241 | 241 | 241 |
| V [N/mm²] = | 726 | 906 | 781 |

Querkraftbeanspruchte Schraubverbindungen

A.4.3 Wellenflansch mit einem Teilkreis

P = M *  Gl. 0.62 mit Gl. 0.63

Dieses Moment stützt sich auf 4 Schrauben mit dem Hebelarm 128/2 mm ab:



a. Gl. 3.3

Gl. 3.1

|  | Lochleibungsdruck | pL [N/mm²] | 12,2 |
| --- | --- | --- | --- |
|  | Querkraftschub | Q [N/mm²] | 27,9 |

b. Gl. 4.39

Gl. 4.12

Gl. 4.11

= MKA

Manz = MGew + MKA = 2 * 22,6 Nm = 45,2 Nm

Schema S. 165

| Vorspannkraft | FV [N] | 21.940 |
| --- | --- | --- |
| Gewindemoment | MGew [Nm] | 22,6 |
| Kopfreibungsmoment | MKA [Nm] | 22,6 |
| Schraubenanzugsmoment | Manz [Nm] | 45,2 |
| Zugspannung | Z [N/mm²] | 378 |
| Torsionsschub | t [N/mm²] | 181 |
| Vergleichsspannung | V [N/mm²] | 492 |

A.4.4 Wellenflansch mit drei Teilkreisen

a. äußerer Lochkreis:

mittlerer Lochkreis:

Die Umfangskraft am mittleren Lochkreis Fum wird **nicht** durch den Reibschluß begrenzt, sondern es kann nur soviel Kraft übertragen werden wie es die gemeinsame Verdrehung mit dem äußeren Lochkreis zuläßt

innerer Lochkreis:

MtWelle = Mta + Mtm + Mti = 576 Nm + 324 Nm + 72 Nm = 972 Nm

1. Am äußeren Lochkreis wird die übertragbare Umfangskraft durch den Reibschluß begrenzt, deshalb muß dort die Vorspannung erhalten bleiben:

FVmina = 12000 N

Für die weiter innen liegenden Lochkreise ist die Vorspannkraft unnötig hoch. Sie kann entsprechend dem Abstand zum Schwerpunkt der Schraubverbindung reduziert werden:

mittlerer Lochkreis:

innerer Lochkreis:

äußerer Lochkreis: MGew = 5,658 Nm

mittlerer Lochkreis: MGew = 4,244 Nm

innerer Lochkreis: MGew = 2,829 Nm

d.

äußerer Lochkreis:

mittlerer Lochkreis:

innerer Lochkreis:

e. Manz = 2 * MGew

|  |  |  | innerer  Lochkreis | mittlerer  Lochkreis | äußerer  Lochkreis | gesamt |
| --- | --- | --- | --- | --- | --- | --- |
| a | MtWelle | [Nm] | 72 | 324 | 576 | 972 |
| b | FVmin | [N] | 6.000 | 9.000 | 12.000 |  |
| c | MGew | [Nm] | 2,829 | 4,244 | 5,658 |  |
|  | Z | [N/mm²] | 299 | 448 | 597 |  |
|  | t | [N/mm²] | 111 | 167 | 222 |  |
| d | V | [N/mm²] | 355 | 533 | 711 |  |
|  | Schrau-bengüte |  | 6.8 | 8.8 | 10.9 |  |
| e | Manz | [Nm] | 5,658 | 8,488 | 11,316 |  |

Längskraftbeanspruchte Schraubverbindungen

A.4.5 Betriebskraft im Verspannungsschaubild

rechnerische Lösung:

Gl. 4.44

FSmax = FV + FBS = 120 kN + 20 kN = 140 kN

FRK = FSmax – FBL = 140 kN – 80 kN = 60 kN



|  | FSmax [kN] | FRK [kN] | fB [µm] |
| --- | --- | --- | --- |
| zeichnerisch | 140 | 60 | 10 |
| rechnerisch | 140 | 60 | 10 |

A.4.6 Druckbehälter

Gl. 4.24

z: Anzahl der Schrauben

p = 24 bar = 24 * 105 N/m² und

FRK = 0,25 * FBL =8.490 N Vorgabe der Aufgabenstellung

FSmax = FBL + FRK = 42.450 N vgl. Bild 4.17

Gl. 4.45

MGew = Gl. 4.12

Gl. 4.11

MGew =

Gl. 4.14

Manz = MGew + MKR = 28,47 Nm + 27,45 Nm = 55,92 Nm Gl. 4.15

nach Schema S. 148

V =

Schraubengüte 10.9  zul = 0,9 * 1.000 N/mm² = 900 N/mm²

Festigkeit ausreichend

| Berechnen Sie die Steifigkeit der Schraube! | cS | N/µm | 687 |
| --- | --- | --- | --- |
| Wie groß ist die Betriebskraft für jede einzelne Schraube? | FBL | N | 33.960 |
| Welche Restklemmkraft übt die einzelne Schraube aus? | FRK | N | 8.490 |
| Welche maximale Kraft erfährt die einzelne Schraube? | FSmax | N | 42.450 |
| Mit welcher Kraft muss jede Schraube vorgespannt werden? | FV | N | 32.960 |
| Welches Moment ist im Gewinde aufzubringen? | MGew | Nm | 28,47 |
| Welches Kopfreibungsmoment wird wirksam? | MKR | Nm | 27,45 |
| Mit welchem Moment muss die Schraube angezogen werden? | Manz | Nm | 55,92 |
| Wie groß sind die Zugspannung in der Schraube? | Z | N/mm² | 732 |
| Welche Torsionsspannung entsteht im Gewinde? | t | N/mm² | 229 |
| Welche Vergleichsspannung belastet die Schraube? | V | N/mm² | 833 |
| Ist die Festigkeit der Schraube ausreichend? |  |  | X ja  O nein |

A.4.7 Rohrleitungsflansch

Gl. 4.15 (laut Aufgabenstellung)

Gl. 4.12

Gl. 4.11

FRK = FBL (laut Aufgabenstellung)

FSmax = FRK + FBL = 2 * N = 8.678 N

V =

Schraubengüte 5.6 mit zul = 300 N/mm²

| Welches Moment wird im Gewinde wirksam? | | MGew | Nm | 6 |
| --- | --- | --- | --- | --- |
| Welches Kopfreibungsmoment tritt auf? | | MKR | Nm | 6 |
| Mit welcher Kraft wird jede Schraube vorgespannt? | | FV | N |  |
| Wie groß ist die Betriebskraft für jede einzelne Schraube? | | FBL | N |  |
| Welche Restklemmkraft übt die einzelne Schraube aus? | | FRK | N |  |
| Welche maximale Kraft erfährt die einzelne Schraube? | | FSmax | N | 8.667 |
| Welcher maximale Druck darf in der Rohrleitung wirksam werden? | | pmax | bar |  |
| Wie groß sind die Zugspannung in der Schraube? | | Z | N/mm² | 237,1 |
| Welche Torsionsspannung entsteht im Gewinde? | | t | N/mm² | 96.0 |
| Welche Vergleichsspannung belastet die Schraube? | | V | N/mm² | 289.6 |
| Welche Schraubengüte ist erforderlich? | 3.6 – 4.6 – **5.6** – 5.8 – 6.8 – 8.8 – 10.9 – 12.9 | | | |
