# Supplementary material
Source: publisher site journal article supplement (https://www.degruyterbrill.com/publication/isbn/9783110692143/downloadAsset/9783110692143_Zusatzmaterial_Basiswissen.zip)
Supplement: Supplementary file 30 [file Basiswissen 2. Auflage, Lösungen Kap. 5.doc]

Basiswissen Maschinenelemente
Lösungen

2. Auflage

von
Prof. Dr.-Ing. Hubert Hinzen

Hochschule Trier, Fachbereich Technik

Oldenbourg Verlag München Wien Vers. 1.0

Lösungen zu Kapitel 5 „Lagerungen“

Lösungen: Lagerungen

Lager mit Festkörperreibung

Bolzen

A.5.1 Bolzen

Biegung:

Lasche schwenkt (quasistatisch):

Lasche dreht (wechselnd):

Querkraftschub:

 Fmax = A * zul =

Lasche schwenkt (quasistatisch):

Lasche dreht (wechselnd):

Pressung Gleitbuchse:

Gl. 5.1

Fmax = pzul * d * s =

|  | Fmax [N]  wenn die Lasche schwenkt | Fmax [N]  wenn sich die Lasche dreht |
| --- | --- | --- |
| aufgrund der Biegung von Stift/Bolzen | 6.773 | 3.079 |
| aufgrund des Querkraftschubes im Stift/Bolzen | 43.103 | 21.551 |
| aufgrund der Pressung in der Gleitbuchse | 5.824 | 5.824 |
|  |  |  |
| insgesamt übertragbar | 5.824 | 3.079 |

|  | Lasche schwenkt | | | Lasche dreht sich | | |
| --- | --- | --- | --- | --- | --- | --- |
|  | Fmax  wird größer | Fmax  bleibt gleich | Fmax  wird kleiner | Fmax  wird größer | Fmax  bleibt gleich | Fmax  wird kleiner |
| Durchmesser von Stift/Bolzen  wird geringfügig vergrößert | X |  |  | X |  |  |
| Länge der Gleitbuchse  wird geringfügig vergrößert | X |  |  |  |  | X |
| Distanzhülse  wird geringfügig verlängert |  | X |  |  |  | X |

A.5.2 Kranlaufrad

Biegung:

Gl. 5.2

Biegeschwellfestigkeit σbzul entsprechend Tabelle 5.2

Querkraftschub:

in Anlehnung an Gl. 3.2

Fmax = 2 * A * zul = 2 *

zulässiger Querkraftschub τzul entsprechend Tabelle 5.2

Pressung Gleitbuchse (besteht aus zwei Teilen, die jeweils von rechts und links eingepresst werden):

Gl. 5.1

zulässige Pressung pGzul entsprechend Tabelle 5.1

Pressung Festsitz:

Gl. 5.1

|  | Fmax [N] |
| --- | --- |
| aufgrund der Biegung Bolzens | 59.007 |
| aufgrund des Querkraftschubes im Bolzen | 282.743 |
| aufgrund der Pressung der Gleitbuchse | 86.400 |
| aufgrund der Pressung des Festsitzes | 189.000 |
|  |  |
| insgesamt übertragbar | 59.007 |

- Der Durchmesser des Bolzens wird geringfügig vergrößert: Die Biegebelastbarkeit wird erhöht und damit das schwächste Glied in der Kette gestärkt.
- Die Gleitbuchse wird zu beiden Seiten hin geringfügig verlängert: Der Biegehebelarm wird vergrößert und damit das schwächste Glied in der Kette geschwächt.
- Der Festsitz des Bolzens wird zu beiden Seiten hin verlängert: Der Biegehebelarm wird vergrößert und damit das schwächste Glied in der Kette geschwächt.
- Die zulässige Flächenpressung am Festsitz wird erhöht: Die Belastbarkeit des Festsitzes wird zwar erhöht, aber damit wird das Schwachglied in der Kette nicht beeinflusst.
- Die zulässige Flächenpressung am Gleitsitz wird erhöht: Die Belastbarkeit des Gleitsitzes wird zwar erhöht, aber damit wird das Schwachglied in der Kette nicht beeinflusst.

|  | Fmax  wird größer | Fmax  bleibt gleich | Fmax  wird kleiner |
| --- | --- | --- | --- |
| Der Durchmesser des Bolzens wird geringfügig vergrößert | X |  |  |
| Die Gleitbuchse wird zu beiden Seiten hin geringfügig verlängert |  |  | X |
| Der Festsitz des Bolzens wird zu beiden Seiten hin verlängert |  |  | X |
| Die zulässige Flächenpressung am Festsitz wird erhöht |  | X |  |
| Die zulässige Flächenpressung am Gleitsitz wird erhöht |  | X |  |

Wälzlager

Konstante Lagerlast

A.5.3 Belastbarkeit und Gebrauchsdauer Wälzlager

erster Aufgabenteil: statisch beanspruchtes Lager:

 Gl. 5.7

nicht umlaufendes Lager: fS = 0,5 ... 1,0 S. 31 unten



keine besonderen Ansprüche: fS = 1,0 ... 1,5



hohe Ansprüche: fS = 1,5 ... 2,5



|  | Frmax [N] |
| --- | --- |
| nicht umläuft, sondern Schwenkbewegungen ausführt | 33.200-16.600 |
| langsam umläuft und an die Laufruhe keine besonderen Ansprüche gestellt wird | 16.600-11.067 |
| langsam umläuft und an die Laufruhe hohe Ansprüche gestellt wird | 11.067-6.640 |

zweiter Aufgabenteil: dynamisch beanspruchtes Lager:

Gl. 5.9 und Gl. 5.10

für 1.000 N und 1.000 min-1:

|  | Fr = 1.000 N | Fr = 2.000 N | Fr = 4.000 N |
| --- | --- | --- | --- |
| n = 1.000 min-1 | 159.933 h = 18,5 Jahre | 19.983 h = 2,28 Jahre | 2.500 h = 104 Tage |
| n = 2.000 min-1 | 79.967 h = 9,25 Jahre | 9.992 h = 1,14 Jahre | 1.250 h = 52 Tage |
| n = 4.000 min-1 | 39.983 h = 4,635 Jahre | 4.996 h = 208 Tage | 625 h = 26 Tage |

A.5.4 Motorradvorderradlagerung

Faktor 1/2 berücksichtigt die Verteilung der Gesamtlast auf das Vorderrad

weiterer Faktor 1/2 berücksichtigt, daß die Vorderradlast auf zwei Lager gleichmäßig verteilt

Raddurchmesser DRad = 18“ + 2 * 2,75“ = 25,4 mm * (18 + 2 * 2,75) = 596,9 mm

Anzahl der Rad- und damit Lagerumdrehungen für 100.000 km

= = 53,327 * 106

 L10 = 53,327

Gl. 5.9 

| Wie groß ist die Kraft, die auf ein einzelnes Lager wirkt? | N | 822 |
| --- | --- | --- |
| Wie groß ist der effektive Raddurchmesser auf der Lauffläche des Reifens? | mm | 596,9 |
| Wie viele Umdrehungen erfährt das Lager im Laufe seiner Gebrauchsdauer? | - | 53,327*106 |
| Wie groß ist der Lebensdauerkennwert L10? | - | 53,327 |
| Welche dynamische Tragzahl ist erforderlich? | N | 3.094 |

A.5.5 Seilscheibenlagerung

Lagerlast:

Faktor wegen Umschlingungswinkel 180°; Faktor ½ wegen Lastverteilung auf zwei Lager

Anzahl der Überrollungen pro Hubvorgang:

Faktor 2 wegen Auf- und Abfahrt unter Last

Anzahl der Überrollungen pro Jahr:

Gl. 5.9 (entspricht 2,326 * 106 Überrollungen)

Lebensdauer in Jahren:

| Wie groß ist die äquivalente Lagerlast für das einzelne Lager? | P [N] | 12.000 |
| --- | --- | --- |
| Wie groß ist die Anzahl der Überrollungen pro Hubvorgang? |  | 8,132 |
| Wie groß ist die Anzahl der Überrollungen pro Jahr? |  | 626.000 |
| Wie groß ist der Lebensdauerkennwert L10? |  | 2,326 |
| Wie viele Jahre wird das Lager der Belastung standhalten? | a [-] | 3,7 |

Zeitlich veränderliche Betriebsgrößen

A.5.6 Fahrstuhl

Gl. 5.12

Gl. 5.13

Pm = 738 N

Lh = = 7.300 h

Gl. 5.10  = 1.051,2

Gl. 5.9 

erforderliche Tragzahl: C = 7.504 N

A.5.18 Schiffsdrucklager

Der Propeller befindet sich auf der linken Seite und ruft eine nach rechts gerichtete Axialkraft hervor, die vorteilhafterweise im Axialkegelrollenlager abgestützt wird. Eine umgekehrt gerichtete Axialkraft (Rückwärtsfahrt) würde ungünstigerweise im Pendelrollenlager übertragen werden müssen.

Axialschub Normallast

Axialschub Volllast

Gl. 5.12

Gl. 5.13

Gl. 5.9

Gl. 5.10

|  |  | Normallast | Volllast |
| --- | --- | --- | --- |
| Zeitanteil | % | 50 | 50 |
| Drehzahl | min-1 | 425 | 575 |
| Leistung | kW | 296 | 354 |
| Axialschub | kN | 79,92 | 95,58 |
| mittlere Drehzahl nm | min-1 | 500 | |
| mittlere Axialbelastung Pm | kN | 89,69 | |
| L10 | - | 1.472 | |
| Lh | h | 49.050 | |

A.5.8 Seilscheibe Fördertechnik

Faktor ½, weil die Gesamtbelastung auf zwei Lager abgestützt wird

1. Maximallast:

Fymax = 0 Fymax = [(30.000 + 10.000) kg * (1 + cos 40°) + 7.500 kg] * 9,81 m/s²

= 383.285 N

Fxmax = 0 Fxmax = (30.000 + 10.000) kg * sin 40° * 9,81 m/s² = 126.115 N

Fmax = = 403.500 N

Minimallast:

Fymin = 0 Fymin = [30.000 kg * (1 + cos 40°) + 7.500 kg] * 9,81 m/s² = 296.661 N

Fxmin = 0 Fxmin = 30.000 kg * sin 40° * 9,81 m/s² = 94.586 N

Fmin = = 311.375 N

1. Gl. 5.14
2. Anzahl der Überrollungen für einen Fördervorgang =

Anzahl der Überrollungen für 50 000 Fördervorgänge = 20,21 * 50.000 = 1.010.508

L10 = 1,010508

Gl. 5.9 

erforderliche Tragzahl C = 365 kN

A.5.9 Hakenflasche

1. maximale Gewichtskraft FG = 10.000 kg * 9,81 m/s² = 98.100 N = P0

für fS = 1 sind P0 und die erforderliche statische Tragzahl gleich: C0 = 98,1 kN

z.B. Lager 51112 mit C0= 122 kN

1. Gesamtbelastung verteilt sich gleichmäßig auf 2 Rollen mit je 2 Lagern

Fr = = 24.525 N

äquivalente Lagerlast:

für *n* = const. Gl. 5.14

volle Seillänge: L = 4 * 10 m = 40 m

Über die in der Prinzipdarstellung links skizzierte Seilrolle wird die Hubhöhe von 10 m abgewickelt, über die obere linke Rolle die doppelte Hubhöhe (2 * 10 m), über die rechte Rolle der Hakenflasche die dreifache Hubhöhe (3 * 10 m) und über die rechte obere Rolle die vierfache Hubhöhe (4 * 10 m).

Bei jedem Hubvorgang werden über die schneller drehende Rolle der Hakenflasche 30 m Seillänge abgerollt

Anzahl der Überrollungen pro Hubvorgang

Faktor 2 wegen Auf- und Abbewegung

Gesamtanzahl der Überrollungen 86,8 * 25.000 = 2.170.295  L10 = 2,170

erforderliche Tragzahl:

Gl. 5.9 

z.B. Lager 6011-RS1 mit C = 29,6 kN
