# Supplementary material
Source: publisher site journal article supplement (https://www.degruyterbrill.com/publication/isbn/9783110692143/downloadAsset/9783110692143_Zusatzmaterial_Basiswissen.zip)
Supplement: Supplementary file 31 [file Basiswissen 2. Auflage, Lösungen Kap. 6.doc]

Basiswissen Maschinenelemente
Lösungen

2. Auflage

von
Prof. Dr.-Ing. Hubert Hinzen

Hochschule Trier, Fachbereich Technik

Oldenbourg Verlag München Wien Vers. 1.0

Lösungen zu Kapitel 6 „Welle-Nabe-Verbindungen“

Lösungen:
Welle-Nabe-Verbindungen

Formschluß

A.6.1 Vergleich formschlüssiger Welle-Nabe-Verbindungen

Paßfederverbindung:

wellenseitig: Umax = pzul * A *  = pzul * t1 * L *  = 60 N/mm² * 5 mm * 32 mm = 9,60 kN

nabenseitig: Umax = pzul * A *  = pzul * t2 * L *  = 60 N/mm² * 3,3 mm * 32 mm = 6,34 kN

Keilwellenverbindung leichte Reihe:

Keilwellenverbindung mittlere Reihe:

Keilwellenverbindung schwere Reihe:

|  | Mtmax [Nm] |
| --- | --- |
| Paßfederverbindung DIN 6885 | 126,8 |
| Keilwellenverbindung DIN ISO 14 leichte Reihe | 437,8 |
| Keilwellenverbindung DIN ISO 14 mittlere Reihe | 604,8 |
| Keilwellenverbindung DIN 5464 schwere Reihe | 756,0 |

Kraftschluß: Klemmverbindungen

Axialklemmverbindungen

A.6.2 Miniflex

Gl. 0.63

P = Mt * ω Gl. 0.62 →

Gl. 6.14

Mtmax = µ * Fax * rm Gl. 6.13

Gl. 6.10

Gl. 4.11

Gl. 4.12

entweder (Annahme "schmaler Kreisring")

MKR = FV * µK * rKR = Gl. 4.14

oder (Annahme "breiter Kreisring")

MKR = FV * µK * rm =

Mges = MGew + MKR = 69,49 Nmm + 69,58 Nm = 139,07 Nm

| Welches Torsionsmoment ist zu übertragen? | | Mt | Nmm | 69,45 |
| --- | --- | --- | --- | --- |
| Welcher Hebelarm ist für die Momentenübertragung zwischen Werkzeug und Flansch maßgebend? | | rm | mm | 2,23 |
| Welche Axialkraft muss für die Momentenübertragung zwischen Werkzeug und Flansch aufgebracht werden? | | Fax | N | 260,0 |
| Welche Flächenpressung entsteht zwischen Werkzeug und Flansch? | | p | N/mm² | 16,55 |
| Welches Gewindemoment muss durch an der Schraube aufgebracht werden, um den Reibschluss des axialen Klemmverbandes sicher zu stellen? | | MGew | Nmm | 69,49 |
| Mit welchem Gesamtmoment muss angezogen werden? | | Mges | Nmm | 139,07 |
| Das Anzugsmoment der Schraube wird durch Arretieren des Werkzeugschafts abgestützt. Ist es auch möglich, das Moment durch Blockieren der Trennscheibe (also noch vor dem Einführen des Werkzeugschafts in das Spannzeug der Bohrmaschine) abzustützen? Begründen Sie Ihre Aussage durch Ankreuzen. | X ja  O nein  weil X MGewinde < MFlansch-Schleifscheibe  weil O MGewinde ≥ MFlansch-Schleifscheibe | | | |

Ist MGew größer oder kleiner als MFlansch-Schleifscheibe?

Gl. 4.12

Gl. 4.14

Die beiden Momente sind fast identisch. Es ist also mehr eine Frage des Zufalls, ob eine Montage durch Blockieren der Trennscheibe möglich ist.

A.6.3 Kreissägenblatt

Gl. 0.63

P = Mt * ω Gl. 0.62 →

Gl. 6.14

Mtmax = µ * Fax * rm Gl. 6.13

Gl. 6.10

Gl. 4.11

Gl. 4.12

MKR = FV * µK * rK = Gl. 4.14

Mges = MGew + MKR = 27,96 Nm + 26,98 Nm = 54,94 Nm

| Welches Torsionsmoment ist zu übertragen? | | | Mt | Nm | 45,27 |  |
| --- | --- | --- | --- | --- | --- | --- |
| Welcher Hebelarm ist für die Momentenübertragung maßgebend? | | | rm | mm | 17,62 |  |
| Welche Axialkraft muss durch die Schraube aufgebracht werden? | | | Fax | N | 32.117 |  |
| Welche Flächenpressung entsteht zwischen Flansch und Sägeblatt? | | | p | N/mm² | 58,4 |  |
| Welches Gewindemoment ist erforderlich? | | | MGew | Nm | 27,96 |  |
| Mit welchem Gesamtmoment muss angezogen werden? | | | Mges | Nm | 54,94 |  |
| Wie hoch ist die Zugspannung in der Schraube? | | | σZ | N/mm² | 554 |  |
| Wie hoch ist der Torsionsschub in der Schraube? | | | τt | N/mm² | 224 |  |
| Welche Vergleichsspannung liegt in der Schraube vor? | | | σV | N/mm² | 676 |  |
| Das Anzugsmoment der Schraube muss in der Welle abgestützt werden. Ist es auch möglich, stattdessen nur das Sägeblatt zu blockieren? Begründen Sie Ihre Aussage durch Ankreuzen. |  ja  O nein | weil O Mgesanz < MWNV  weil  MGew < MWNV  weil O MKopfreibung < MWNV  weil O Mgesanz ≥ MWNV  weil O MGew ≥ MWNV  weil O MKopfreibung ≥ MWNV | | | | |

Radialklemmverbindungen

A.6.4 Schalenkupplung

Die dargestellte Schalenkupplung setzt sich aus zwei hintereinandergeschalteten radialen Klemmverbindungen zusammen: In der linken Kupplungshälfte wird das Moment von der linken Welle auf die Kupplung übertragen und in der rechten Kupplungshälfte wird das Moment von der Kupplung auf die rechte Welle übertragen.

a) Die Schraube wird auf Zug und Torsion beansprucht:

mit

b) Mtmax = 3,14 * µ * d * i * FV

c)

| d) |  | ja | nein |
| --- | --- | --- | --- |
|  | Verwendung von Schrauben höherer Festigkeit | X |  |
|  | Verwendung einer Nabe höherer Festigkeit |  | X |
|  | Verwendung von Schrauben größeren Durchmessers | X |  |
|  | Erhöhung der Schraubenanzahl | X |  |
|  | Verwendung einer Welle höherer Festigkeit |  | X |

A.6.5 Variation der Ansätze

Sämtliche hier benutzten Gleichungen sind in Bild 6.12 zusammengestellt.

1. Dimensionierung nach der **zulässigen Pressung**:

„biegesteife“ Nabe:

Mtmax = 1,57 * L * d² * µ * pzul

Mtmax = 1,57 * mm * (50mm)² * 0,1 * 60 N/mm² = 1154 Nm

„biegeweiche“ Nabe:

Mtmax = L * d² * µ * pzul = mm * (50mm)² * 0,1 * 60 N/mm² = 735 Nm

|  |  | Annahme  „biegesteife Nabe“ | Annahme  „biegeweiche Nabe“ |
| --- | --- | --- | --- |
|  | **pmax = pzul [N/mm²]** | **60** | **60** |
|  | Mt [Nm] | 1154 | 735 |
|  | FV [kN] | 49,0 | 38,4 |

1. Dimensionierung nach dem zu **übertragenden Moment**:

„biegesteife“ Nabe:

„biegeweiche“ Nabe:

|  |  | Annahme  „biegesteife Nabe“ | Annahme  „biegeweiche Nabe“ |
| --- | --- | --- | --- |
|  | pmax [N/mm²] | 41,6 | 65,2 |
|  | **Mt [Nm]** | **800** | **800** |
|  | FV [kN] | 34,0 | 41,8 |

1. Dimensionierung nach dem zu **maximalen Schraubenvorspannkraft**:

„biegesteife“ Nabe:

Mtmax = 3,14 *µ * d * i * FV = 3,14 * 0,1 * 50mm * 1,5 * 44kN = 1037 Nm

„biegeweiche“ Nabe:

Mtmax = 2,55 *µ * d * i * FV = 2,55 * 0,1 * 50mm * 1,5 * 44 kN = 841 Nm

|  |  | Annahme  „biegesteife Nabe“ | Annahme  „biegeweiche Nabe“ |
| --- | --- | --- | --- |
|  | pmax [N/mm²] | 55,4 | 68,8 |
|  | Mt [Nm] | 1037 | 841 |
|  | **FV = FVmax [kN]** | **44** | **44** |

Kraftschluß: Zylinderpreßverband

Erforderliche Mindestpressung

A.6.6 Erforderliche Pressung bei Torsions- und Längskraftbelastung

Gl. 6.33

Fax = 10 kN  21,8 N/mm²

Mt = 500 Nm  = 57,4 N/mm²

Fax = 10 kN und Mt = 500 Nm

 = 61,4 N/mm²

| Welche Pressung ist erforderlich, wenn eine Axialkraft *Fax* = 10 kN übertragen werden soll? | p | N/mm² | 21,8 |
| --- | --- | --- | --- |
| Welche Pressung ist erforderlich, wenn ein Torsionsmoment *Mt* = 500 Nm übertragen werden soll? | p | N/mm² | 57,4 |
| Welche Pressung ist erforderlich, wenn sowohl die o.a. Axialkraft *Fax* als auch das Torsionsmoment *Mt* gleichzeitig übertragen werden sollen? | p | N/mm² | 61,4 |

A.6.7 Erforderlicher Durchmesser bei Torsions- und Längskraftbelastung

a. Axialkraft wird formschlüssig abgestützt,

nur das Torsionsmoment belastet den Reibschluß

Gl. 6.31 L = 0,9 * d

d = 46,96 mm  L = 42,27 mm

1. Axialkraft und Torsionsmoment belasten den Reibschluß

L = 0,9 * d

Auflösen der Gleichung nach d problematisch

daher Umstellung der Gleichung und Iteration;

Reibwert µ = 0,08 soll vollständig ausgenutzt werden

Iterationsanfang beispielsweise d = 47mm wie unter a.

d = 47 mm  Fres/FN = 0,125  µ = 0,08 rutscht  d vergrößern

d = 50 mm  Fres/FN = 0,108  µ = 0,08 rutscht  d vergrößern

d = 55 mm  Fres/FN = 0,086  µ = 0,08 rutscht  d vergrößern

d = 58 mm  Fres/FN = 0,076  µ = 0,08 hält  d verkleinern

d = 56 mm  Fres/FN = 0,082  µ = 0,08 rutscht  d vergrößern

d = 57 mm  Fres/FN = 0,079  µ = 0,08 hält  d verkleinern

 d = 57 mm; L = 51,3 mm, aufgerundet: L = 52 mm

| Bestimmen Sie den erforderlichen Fügedurchmesser der Verbindung, wenn die Axialkraft so eingeleitet wird wie in der Skizze dargestellt. | d | mm | 46,96 |
| --- | --- | --- | --- |
| Bestimmen Sie den erforderlichen Fügedurchmesser für den Fall, dass die Axialkraft in umgekehrter Richtung eingeleitet wird. Hinweis: Die Berechnung vereinfacht sich, wenn Sie iterativ vorgehen. | d | mm | 57 |
