# Supplementary material
Source: publisher site journal article supplement (https://www.degruyterbrill.com/publication/isbn/9783110692143/downloadAsset/9783110692143_Zusatzmaterial_Basiswissen.zip)
Supplement: Supplementary file 32 [file Basiswissen 2. Auflage, Lösungen Kap. 7.doc]

Basiswissen Maschinenelemente
Lösungen

2. Auflage

von
Prof. Dr.-Ing. Hubert Hinzen

Hochschule Trier, Fachbereich Technik

Oldenbourg Verlag München Wien Vers. 1.0

Lösungen zu Kapitel 7 „Grundsätzliche Bauformen gleichförmig übersetzender Getriebe“

Lösungen: Grundlegende Bauformen gleichförmig übersetzender Getriebe

A.7.1 Gegenüberstellung formschlüssiges – reibschlüssiges Getriebe

|  | Reib-schluß | Form-schluß |
| --- | --- | --- |
| Kurzzeitige Überlast kann ggf. durch Gleitschlupf schadlos aufgenommen werden | X |  |
| Hohe radiale Belastung der Räder zur Sicherstellung der Momentenübertragung erforderlich | X |  |
| Übersetzungsverhältnis nur in diskreten Stufen, nicht aber stufenlos möglich |  | X |
| Einfache Übertragungskinematik: Hebelarme des Übersetzungs-verhältnisses als Radius der Räder konstruktiv vorhanden | X |  |
| In gewissen Grenzen jedes beliebige Übersetzungsverhältnis realisierbar, je nach Bauart auch stufenlos | X |  |
| Schlupfbehaftete, nicht exakt reproduzierbare, nicht exakt winkelgetreue Übertragung der Drehbewegung | X |  |
| Komplizierte Übertragungskinematik: Die Hebelarme des Übersetzungsverhältnisses sind konstruktiv **nicht** vorhanden. |  | X |
| Hohe Belastung von Wellen und Lager, aus diesem Grund raum- und gewichtsbeanspruchende Bauweise | X |  |
| Reproduzierbare, winkelgetreue Übertragung der Drehbewegung, kein Schlupf |  | X |

Reibradgetriebe

A.7.2 Reibradgetriebe Gummi - Stahl

zulässige Wälzpressung kzul

nan = 100 min-1: Gl. 0.63

Tabelle 7.4

nan = 200 min-1:

nan = 400 min-1:

Ersatzkrümmungsdurchmesser d0

i = 100:200  Gl. 7.11

i = 100:400 

i = 100:800 

Erforderliche Scheibenbreite L





 Gl. 7.14

|  |  | i = 100:200 | i = 100:400 | i = 100:800 |
| --- | --- | --- | --- | --- |
|  | kzul [N/mm²] | d0 = 66,7 mm | d0 = 80,0 mm | d0 = 88,9 mm |
| nan = 100 min-1 | 0,480 | L = 15,6 mm | L = 13,0 mm | L = 11,7 mm |
| nan = 200 min-1 | 0,464 | L = 16,2 mm | L = 13,5 mm | L = 12,1 mm |
| nan = 400 min-1 | 0,276 | L = 27,2 mm | L = 22,6 mm | L = 20,4 mm |

A.7.3 Wälzgetriebe mit Kettenabtrieb

Gl. 7.11

nZW = 900 min-1: Gl. 0.63

Tabelle 7.4





nZW = 1.800 min-1:





| Drehzahl Zwischenwelle nZW | min-1 | 900 | 1.800 |
| --- | --- | --- | --- |
| Ersatzkrümmungsdurchmesser d0 | mm | 94,9 | 94,9 |
| zulässige Wälzpressung kzul | N/mm² | 0,0766 | 0,0455 |
| zulässige Normalkraft FN | N | 261,7 | 155,6 |
| übertragbare Umfangskraft FU | N | 157,0 | 93,4 |
| zulässiges Moment M Zwischenwelle | Nm | 19,23 | 11,4 |
| übertragbare Leistung P | W | 1.813 | 2.156 |

A.7.4 Zweistufiges Wälzgetriebe Stahl/Gummi

Winkelgeschwindigkeit Zwischenwelle:

Geschwindigkeit im Wälzkontakt:

linke Stufe:

 Tabelle 7.4

rechte Stufe:

 Tabelle 7.4

linke Stufe: Gl. 7.11

rechte Stufe:

Gl. 7.14 

linke Stufe:

rechte Stufe:



linke Stufe:

rechte Stufe:

linke Stufe:

rechte Stufe:

|  |  | linke Stufe | rechte Stufe |
| --- | --- | --- | --- |
| Umfangsgeschwindigkeit v | m/s | 1,963 | 0,785 |
| zulässige Wälzpressung kzul | N/mm² | 0,289 | 0,480 |
| Ersatzkrümmungsdurchmesser d0 | mm | 60,6 | 73,0 |
| zulässige Normalkraft Fn | N | 560,4 | 1401,6 |
| übertragbare Umfangskraft Ft | N | 392,3 | 981,1 |
| zulässiges Moment Zwischenwelle | Nm | 49,0 | 49,0 |
| übertragbare Leistung P | W | 770,6 | 770,6 |

Das Getriebe ist perfekt abgestimmt: Die linke und die rechte Stufe können die gleiche maximale Leistung übertragen.

A.7.5 Reibradgetriebe mit Wälzlagerung

**Dimensionierung der Reibräder**

sowohl für Stahl/Stahl als auch Stahl/Gummi:

Gl. 7.11



zulässige Belastung Stahl – Stahl:

Gl. 7.13

zulässige Belastung Stahl – Gummi für 1 m/s  v  30 m/s:

Gl. 7.14

 FNmax = kzul * d0 * L = 0,246 N/mm² * 78,3 mm * 32 mm = 617,5 N

übertragbare Umfangskraft: FUmax = µ * FNmax

für Stahl – Stahl: FUmax = 0,03 * 14.412 N = 432,4 N

für Stahl – Gummi: FUmax = 0,7 * 617,5 N = 432,3 N

übertragbares Antriebsmoment: =

übertragbare Leistung: Pmax = M1max * 1 = 24,21 Nm * 43,43 s-1 = 1,05 kW

Kraftresultierende im Wälzkontakt:

für Stahl – Stahl:

für Stahl – Gummi:

|  |  | Stahl – Stahl | Stahl – Gummi |
| --- | --- | --- | --- |
| Ersatzkrümmungsdurchmesser d0 | mm | 78,3 | |
| Umfangsgeschwindigkeit v | m/s | 2,432 | |
| zulässige Belastung Hz zul bzw. kzul | N/mm² | 650 | 0,246 |
| zulässige Normalkraft FN | N | 14.412 | 617,5 |
| übertragbare Umfangskraft FU | N | 432,4 | 432,4 |
| zulässiges Antriebsmoment M1 | Nm | 24,21 | 24,21 |
| übertragbare Leistung P | kW | 1,05 | 1,05 |
| Kraftresultierende im Wälzkontakt Fres | N | 14.418 | 753,8 |

**Dimensionierung der Wälzlagerung**

Getriebe Stahl – Stahl:

Lagerbelastung bei Volllast:

Lagerbelastung bei halber Last:

Bei Teillast werden die Lager so gut wie nicht entlastet, weil die dominante Normalkraftbelastung in voller Größe erhalten bleibt

für n = const. Gl. 5.14

=

Getriebe Stahl – Gummi:

Lagerbelastung bei Volllast:

Lagerbelastung bei halber Last:

Bei Teillast werden die Lager deutlich entlastet

= Gl. 5.14

Gl. 5.11 

Antriebswelle:

Abtriebswelle:



Stahl – Stahl Antriebswelle:

Stahl – Stahl Abtriebswelle:

Stahl – Gummi Antriebswelle:

Stahl – Gummi Abtriebswelle:

|  | |  | Stahl – Stahl | | Stahl – Gummi | |
| --- | --- | --- | --- | --- | --- | --- |
|  | | | Antriebs-welle | Abtriebs-welle | Antriebs-welle | Abtriebs-welle |
| Drehzahl | min-1 | | 414,7 | 178,2 | 414,7 | 178,2 |
| Lagerbelastung bei Volllast FVL | N | | 7.209 | | 376,9 | |
| Lagerbelastung bei Teillast FTL | N | | 7.207 | | 327,1 | |
| mittlere Belastung Pm | N | | 7.207 | | 338,3 | |
| L10 | - | | 199,1 | 85,54 | 199,1 | 85,54 |
| erforderliche Tragzahl | N | | 42.080 | 31.755 | 1.975 | 1.491 |

Riemengetriebe

A.7.6 Treibscheibe Förderkorb

mit Nutzlast: Zugtrum (höhere Belastung) rechts:

SZ = 5.000 kg * 9,81 m/s²

Leertrum (geringere Belastung) links:

SL = 4.500 kg * 9,81 m/s²

linke Seite von Gl. 7.20

ohne Nutzlast: Zugtrum (höhere Belastung) links:

SZ = 4.500 kg * 9,81 m/s²

Leertrum (geringere Belastung) rechts:

SL = 4.000 kg * 9,81 m/s²

linke Seite von Gl. 7.20

|  |  | mit Nutzlast | ohne Nutzlast |
| --- | --- | --- | --- |
|  |  | 1,111 | 1,125 |

a.  = (nur rechte Scheibe)

e = = 1,1162 rechte Seite von Gl. 7.20

1.  = 2 * (beide Scheiben)

e = = 1,246 rechte Seite von Gl. 7.20

1. Umschlingungswinkel nur an der linken Scheibe:  = 

Berechnung wie b.

1.  = (nur rechte Scheibe)

µeff = = 0,271 s. auch Gl. 7.23 = = 1,529

|  | a | | b | | c | | d | |
| --- | --- | --- | --- | --- | --- | --- | --- | --- |
|  | mit  Nutz-  last | ohne  Nutz-  last | mit  Nutz-  last | ohne  Nutz-  last | mit  Nutz-  last | ohne  Nutz-  last | mit  Nutz-  last | ohne  Nutz-  last |
| Last übertragbar | X |  | X | X | X | X | X | X |
| Seiltrieb rutscht durch |  | X |  |  |  |  |  |  |

A.7.7 Leertrumvorspannung, Übersetzung 1:1

a. SZmax = zul * A = 25 N/mm² * 3 mm * 26 mm = 1.950 N Gl. 7.26

eµ = e0,6 *  = 6,586  Gl. 7.20

U = SZ – SL = 1.950 N – 296 N = 1.654 N Gl. 7.23

Gl. 0.63

P = M *  = 236 Nm * 5,027 s-1 = 1.189 W Gl. 0.62

1. SL = 296 N bleibt nach Aufgabenstellung erhalten (Leertrumvorspannung)

M = 0,505 * 236 Nm = 119 Nm

U = 0,505 * 1.654 N = 834 N

SZ = SL + U = 296 N + 834 N = 1.131 N

1. Lösung 1:

Leistung, Moment und Umfangskraft bleiben gegenüber b. erhalten, die Vorspannung wird aber so weit reduziert, daß der Riementrieb an der Rutschgrenze betrieben wird:

eµ = e0,6 *  = 6,586 = Gl. 7.26

U = 834,6 N = SZ – SL = Gl. 7.29

SL = SZ – U = 984,0 N – 834,6 N = 149,4 N

Lösung 2:

Da der Riemen wieder an der Rutschgrenze betrieben wird können sämtliche Ergebnisse aus a. mit dem Faktor 0,505 multipliziert werden.

|  |  | Belastbarkeit  des Riementriebes voll ausgenutzt | Antriebsmotor  600 W  Vorspannkraft wie bei Volllast | Antriebsmotor  600 W  Vorspannkraft minimiert |
| --- | --- | --- | --- | --- |
| Zugtrumkraft SZ | [N] | 1.950 | 1.131 | 984 |
| Leertrumkraft SL | [N] | 296 | 296 | 149 |
| Umfangskraft U | [N] | 1.654 | 834 | 834 |
| Moment M | [Nm] | 236 | 119 | 119 |
| Leistung P | [W] | 1.189 | **600** | **600** |

A.7.8 Zugtrumvorspannung

Gl. 7.29

 = 180° - 2 *  = 180° - 2 * 35,0° = 110,0° Gl. 7.28

Gl. 7.20

Gl. 0.63

P = M1 * 1 

Gl. 7.25

Gl. 7.23

Die Kraft auf die Welle ist für beide Riemenscheiben gleich. Für die antreibende Scheibe ergibt sich:

Gl. 7.33

SV = SZ = 1.717 N

Gl. 7.26 

 SV8kW = 0,667 * 1.717 N = 1.144,7 N

b8kW = 0,667 * 31,8 mm = 21,2 mm

Gl. 7.30

LRiemen = 1.625,8 mm

| Wie groß ist die Zugtrumkraft, wenn der Riementrieb an der Rutschgrenze betrieben wird? | SZ | N | 1.717 |
| --- | --- | --- | --- |
| Wie groß ist dann die Leertrumkraft? | SL | N | 448 |
| Wie groß ist die Radialkraft auf die Antriebswelle? | FWelle | N | 1.917 |
| Wie groß ist die Radialkraft auf die Abtriebswelle? | FWelle | N | 1.917 |
| Wie groß muss die durch die Spannrolle in den Riemen eingeleitete Vorspannkraft sein? | SV 12kW | N | 1.717 |
| Wie breit muss der Riemen mindestens sein? | b12kW | mm | 31,8 |
| Die Antriebsleistung wird unter Beibehaltung der Drehzahl auf 8 kW reduziert. Wie groß muss dann die in den Riemen eingeleitete Vorspannung sein? | SV 8kW | N | 1.145 |
| Wie breit muss der Riemen mindestens sein, wenn die Vorspannung entsprechend angepasst wird? | b8kW | mm | 21,2 |
| Wie lang ist der Riemen? | LRiemen | mm | 1.626 |

A.7.9 Minimaler Scheibendurchmesser eines Riementriebes

Je kleiner der Scheibendurchmesser wird, desto größer werden die Riemenkräfte. Da die Riemenkräfte aber durch die Belastbarkeit des Riemens begrenzt sind, kann der Scheibendurchmesser nicht beliebig klein werden, sondern darf einen Wert dmin nicht unterschreiten.

eµ = eµ* i = 1: 1  Umschlingungswinkel an beiden Scheiben 180°

SZmax = zul * ARiemen = 20 N/mm² * 2 mm * 12 mm = 480 N für alle Reibwerte Gl. 7.26

Gl. 7.20 

U = SZ – SL Gl. 7.23

Gl. 0.63

 Gl. 0.62

Gl. 7.35 

|  |  | µ = 0,5 | µ = 0,6 | µ = 0,7 | µ = 0,8 |
| --- | --- | --- | --- | --- | --- |
| eµ | [-] | 4,81 | 6,59 | 9,02 | 12,35 |
| SZ | [N] | 480 | 480 | 480 | 480 |
| SL | [N] | 99,8 | 72,8 | 53,2 | 38,9 |
| U | [N] | 380,2 | 407,2 | 426,8 | 441,1 |
| dmin | [mm] | 83,7 | 78,2 | 74,6 | 72,2 |

A.7.10 Riementrieb, kleinstmöglicher Achsabstand

Je kleiner der Scheibendurchmesser wird, desto größer werden die Riemenkräfte. Da die Riemenkraft aber durch die Belastbarkeit des Riemens begrenzt ist, kann der Scheibendurchmesser nicht beliebig klein werden, sondern darf einen Wert dmin nicht unterschreiten.

SZ = zul * ARiemen = 24 N/mm² * 3 mm * 50 mm = 3.600 N Gl. 7.26

Bei dem angestrebten möglichst kurzen Achsabstand müssen die beiden Scheiben so positioniert werden, daß sie fast einander berühren (vgl. Bild 7.19). Damit gewinnt man in Anlehnung an Gl. 7.29 für den Winkel  den folgenden Ausdruck:

d2 = 2,8 * d1

 = 180° - 2 *  = 180° - 2 * 28,27° = 123,45° Gl. 7.28

e = e0,45*2,155 = 2,636 = Gl. 7.20 

U = SZ – SL = 3.600 N – 1.365,3 N = 2.234,7 N Gl. 7.23

Gl. 7.25 

d2 = d1 * 2,8 = 225,5mm * 2,8 = 631,5 mm

Tatsächlich muß der Achsabstand geringfügig vergrößert werden, damit sich die Räder einander nicht berühren. Dadurch wird der Umschlingswinkel  geringfügig größer und dadurch die Rutschsicherheit größer.

| SZ | [N] | 3.600 | β | [°] | 28,27 | d1 | [mm] | 225,5 |
| --- | --- | --- | --- | --- | --- | --- | --- | --- |
| SL | [N] | 1.365,3 |  | [°] | 123,45 | d2 | [mm] | 631,5 |
| U | [N] | 2.234,7 | eµ | [-] | 2,636 | a | [mm] | 428,5 |

A.7.11 Riementrieb, Variation von Vorspannung und Moment

eµ = e0,65 *  = 7,706

Szul = zul * AR = 20 N/mm² * 28 mm * 3 mm = 1.680 N

| eµ | 7,706 | Szul [N] | 1.680 |
| --- | --- | --- | --- |

M = 77,7 Nm:



SL = 48 N SZ = SL + U = 48 N + 1.295 N = 1.343 N < Szul = 1.680 N

 Festigkeitsgrenze nicht ausgenutzt

>  Rutschgrenze überschritten

SL = 218 N SZ = SL + U = 218 N + 1.295 N = 1.513 N < Szul = 1.680 N

 Festigkeitsgrenze nicht ausgenutzt

<  Rutschgrenze nicht ausgenutzt

SL = 388 N SZ = SL + U = 388 N + 1.295 N = 1.683 N > Szul = 1.680 N

 Festigkeitsgrenze überschritten

<  Rutschgrenze nicht ausgenutzt

M = 87,7 Nm:



SL = 48 N SZ = SL + U = 48 N + 1.462 N = 1.510 N < Szul = 1.680 N

 Festigkeitsgrenze nicht ausgenutzt

>  Rutschgrenze überschritten

SL = 218 N SZ = SL + U = 218 N + 1.462 N = 1.680 N = Szul = 1.680 N

 Festigkeitsgrenze genau ausgenutzt

 Rutschgrenze genau ausgenutzt

SL = 388 N SZ = SL + U = 388 N + 1.462 N = 1.850 N  Szul = 1.680 N

 Festigkeitsgrenze überschritten

<  Rutschgrenze nicht ausgenutzt

M = 97,7 Nm:



SL = 48 N SZ = SL + U = 48 N + 1.628 N = 1.676 N  Szul = 1.680 N

 Festigkeitsgrenze nicht ausgenutzt

  Rutschgrenze überschritten

SL = 218 N SZ = SL + U = 218 N + 1.628 N = 1.846 N  Szul = 1680 N

 Festigkeitsgrenze überschritten

  Rutschgrenze überschritten

SL = 388 N SZ = SL + U = 388 N + 1.628 N = 2.016 N  Szul = 1680 N

 Festigkeitsgrenze überschritten

<  Rutschgrenze nicht ausgenutzt

|  | M = 77,7 Nm | M = 87,7 Nm | M = 97,7 Nm |
| --- | --- | --- | --- |
| SL = 48 N | Rutschgrenze  O nicht ausgenutzt  O genau ausgenutzt   überschritten  Festigkeitsgrenze   nicht ausgenutzt  O genau ausgenutzt  O überschritten | Rutschgrenze  O nicht ausgenutzt  O genau ausgenutzt   überschritten  Festigkeitsgrenze   nicht ausgenutzt  O genau ausgenutzt  O überschritten | Rutschgrenze  O nicht ausgenutzt  O genau ausgenutzt   überschritten  Festigkeitsgrenze   nicht ausgenutzt  O ausgenutzt  O überschritten |
| SL = 218 N | Rutschgrenze   nicht ausgenutzt  O genau ausgenutzt  O überschritten  Festigkeitsgrenze   nicht ausgenutzt  O genau ausgenutzt  O überschritten | Rutschgrenze  O nicht ausgenutzt   genau ausgenutzt  O überschritten  Festigkeitsgrenze  O nicht ausgenutzt   genau ausgenutzt  O überschritten | Rutschgrenze  O nicht ausgenutzt  O genau ausgenutzt   überschritten  Festigkeitsgrenze  O nicht ausgenutzt  O genau ausgenutzt   überschritten |
| SL = 388 N | Rutschgrenze   nicht ausgenutzt  O ausgenutzt  O überschritten  Festigkeitsgrenze  O nicht ausgenutzt  O ausgenutzt   überschritten | Rutschgrenze   nicht ausgenutzt  O ausgenutzt  O überschritten  Festigkeitsgrenze  O nicht ausgenutzt  O ausgenutzt   überschritten | Rutschgrenze   nicht ausgenutzt  O ausgenutzt  O überschritten  Festigkeitsgrenze  O nicht ausgenutzt  O ausgenutzt   überschritten |

A.7.12 Bandschleifer

M = = 2,82 Nm

aus Gl. 7.25

 = 180° - 7° = 173° e = e0,5*3,02 = 4,549

Gl. 7.20

SZ – SL = U 

= 31,8 N

SV = SL = 31,8 N; FFeder = SV * (1 + cos 7°) = 63,36 N

Gl. 2.26

zunächst Annahme: K = 1,200



Gl. 2.24





 d  2 mm nach Vorgabe der Aufgabenstellung gerundet

Forderung der Aufgabenstellung

Gl. 2.33

| Welches Moment wird von der Antriebswalze auf das Schleifband übertragen? | M | Nm | 2,82 |
| --- | --- | --- | --- |
| Berechnen Sie die Zugtrumkraft im Schleifband! | SZ | N | 144,5 |
| Wie groß ist die Leertrumkraft? | SL | N | 31,8 |
| Welche Kraft muss in die Feder eingeleitet werden, um den Vorspannungszustand sicher zu stellen? | FFeder | N | 63,36 |
| Wie groß ist der erforderliche Drahtdurchmesser? | d | mm | 2 |
| Wie viele federnde Windungen müssen vorgesehen werden, wenn der mit einem Hebelmechanismus eingebrachte Vorspannweg 4 mm beträgt? | iw | - | 8,83 |

Zahnradgetriebe

A.7.13 Überdeckungsgrad Evolventenverzahnung

Gl. 7.38

Gl. 7.35  dw2 = 2,5 * dw1

dw2 = 2,5 * dw1 = 285,71 mm

Festlegung vorläufig, weil ganzzahlig sein muß

m = 1 mm

Gl. 7.43

Gl. 7.35

dw1 = m * z1 = 114 mm dw2 = m * z2 = 286 mm

db1 = dw1 * cos  = 114 mm * cos 20° = 107,125 mm Gl. 7.37

db2 = dw2 * cos  = 286 mm * cos 20° = 268,752 mm

Kontrolle:

da1 = dw1 + 2 * m = 114 mm + 2 * 1 mm = 116 mm Gl. 7.58

da2 = dw2 + 2 * m = 286 mm + 2 * 1 mm = 288 mm

df1 = dw1 - 2 * m = 114 mm - 2 * 1 mm = 112 mm Gl. 7.57

df2 = dw2 - 2 * m = 286 mm - 2 * 1 mm = 284 mm

p = m *  = 1 mm *  = 3,1416 mm Gl. 7.43

Gl. 7.55

 1

m = 2 mm

dw1 = m * z1 = 2 mm * 57 = 114 mm dw2 = m * z2 = 2 mm * 143 = 286 mm

Grundkreisdurchmesser wie bei m = 1 mm

da1 = dw1 + 2 * m = 114 mm + 2 * 2 mm = 118 mm

da2 = dw2 + 2 * m = 286 mm + 2 * 2 mm = 290 mm

df1 = dw1 - 2 * m = 114 mm - 2 * 2 mm = 110 mm

df2 = dw2 - 2 * m = 286 mm - 2 * 2 mm = 282 mm

p = m *  = 2 mm *  = 6,283 mm

 1

m = 4 mm

dw1 = m * z1 = 4 mm * 29 = 116 mm dw2 = m * z2 = 4 mm * 71 = 284 mm

db1 = dw1 * cos  = 116 mm * cos 20° = 109,004 mm

db2 = dw2 * cos  = 284 mm * cos 20° = 266,873 mm

da1 = dw1 + 2 * m = 116 mm + 2 * 4 mm = 124 mm

da2 = dw2 + 2 * m = 284 mm + 2 * 4 mm = 292 mm

df1 = dw1 - 2 * m = 116 mm - 2 * 4 mm = 108 mm

df2 = dw2 - 2 * m = 284 mm - 2 * 4 mm = 276 mm

p = m *  = 4 mm *  = 12,566 mm

 1

m = 6 mm

dw1 = m * z1 = 6 mm * 19 = 114 mm dw2 = m * z2 = 6 mm * 48 = 288 mm

db1 = dw1 * cos  = 114 mm * cos 20° = 107,125 mm

db2 = dw2 * cos  = 288 mm * cos 20° = 270,631 mm

da1 = dw1 + 2 * m = 114 mm + 2 * 6 mm = 126 mm

da2 = dw2 + 2 * m = 288 mm + 2 * 6 mm = 300 mm

df1 = dw1 - 2 * m = 114 mm - 2 * 6 mm = 102 mm

df2 = dw2 - 2 * m = 288 mm - 2 * 6 mm = 276 mm

p = m *  = 6 mm *  = 18,850 mm

 1

|  | m = 1 mm | m = 2 mm | m = 4 mm | m = 6 mm |
| --- | --- | --- | --- | --- |
| Zähnezahl des antreibenden Rades z1 | 114 | 57 | 29 | 19 |
| Zähnezahl des angetrieben Rades z2 | 286 | 143 | 71 | 48 |
| tatsächliches Übersetzungs-  verhältnis itats | 2,509 | 2,509 | 2,448 | 2,526 |
| prozentuale Abweichung vom vorgege-benen Übersetzungsverhältnis i [%] | 0,351 | 0,351 | 2,07 | 1,05 |
| Wälzkreisdurchmesser des  antreibenden Rades dw1 [mm] | 114 | 114 | 116 | 114 |
| Wälzkreisdurchmesser des  angetriebenen Rades dw2 [mm] | 286 | 286 | 284 | 288 |
| tatsächlicher Achsabstand atats [mm] | 200 | 200 | 200 | 201 |
| Grundkreisdurchmesser des  antreibenden Rades db1 [mm] | 107,125 | 107,125 | 109,004 | 107,125 |
| Grundkreisdurchmesser des  angetriebenen Rades db2 [mm] | 268,752 | 268,752 | 266,873 | 270,631 |
| Kopfkreisdurchmesser des  antreibenden Rades da1 [mm] | 116 | 118 | 124 | 126 |
| Kopfkreisdurchmesser des  angetriebenen Rades da2 [mm] | 288 | 290 | 292 | 300 |
| Fußkreisdurchmesser des  antreibenden Rades df1 [mm] | 112 | 110 | 108 | 102 |
| Fußkreisdurchmesser des  angetriebenen Rades df2 [mm] | 284 | 282 | 276 | 276 |
| Teilung p [mm] | 3,1416 | 6,283 | 12,566 | 18,850 |
| Überdeckungsgrad  | 1,899 | 1,832 | 1,728 | 1,646 |

A.7.14 Beanspruchung von Zahnfuß und Zahnflanke

M1 = = 167,8 Nm d1 = m * z1 = 3 mm * 20 = 60 mm

 Ft = = 5.592 N

F = mit Gl. 7.67

Hz = Gl. 7.71 i = = 1,9

Hz = = 1.344 N/mm²

| Wie groß wird die Spannung im Zahnfuß? | N/mm² | 456 |
| --- | --- | --- |
| Welche Zahnflankenpressung entsteht bei dieser Belastung? | N/mm² | 1.344 |

A.7.15 Übertragbare Leistung Zahnradpaarung

Modul 1,25 mm

Gl. 7.38 d = m * z Gl. 7.43

 z2 = z1 * i

z2 = z1 * i = 32 * 3,2 = 102,40  102 (ganzzahlig gerundet)

d = m * z d1 = 1,25 mm 32 = 40,000 mm d2 = 1,25 mm * 102 = 127,500 mm

b = 25 * m = 25 * 1,25 mm = 31,25 mm

F = YF*Y*YS*KA*KV*KF*KF * mit Gl. 7.67

Modul 1,50 mm

(ganzzahlig gerundet)

z2 = z1 * i = 27 * 3,2 = 86,40  86 (ganzzahlig gerundet)

d = m * z d1 = 1,50 mm 27 = 40,500 mm d2 = 1,50 mm * 86 = 129,000 mm

b = 25 * m = 25 * 1,50 mm = 37,500 mm

Modul 2,00 mm

z2 = z1 * i = 20 * 3,2 = 64,00

d = m * z d1 = 2,00 mm 20 = 40,000 mm d2 = 2,00 mm * 64 = 128,000 mm

b = 25 * m = 25 * 2,00 mm = 50,00 mm

Modul 2,5 mm

z2 = z1 * i = 16 * 3,2 = 51,2  51 (ganzzahlig gerundet)

d = m * z d1 = 2,5 mm 16 = 40,000 mm d2 = 2,5 mm * 51 = 127,500 mm

b = 25 * m = 25 * 2,50 mm = 62,50 mm

| Modul m | mm | 1,25 | 1,50 | 2,00 | 2,50 |
| --- | --- | --- | --- | --- | --- |
| Zähnezahl z1 | - | 32 | 27 | 20 | 16 |
| Zähnezahl z2 | - | 102 | 86 | 64 | 51 |
| Wälzkreisdurchmesser d1 | mm | 40,000 | 40,500 | 40,000 | 40,000 |
| Wälzkreisdurchmesser d2 | mm | 127,500 | 129,000 | 128,000 | 127,500 |
| tatsächlicher Achsabstand atats | mm | 83,75 | 84,75 | 84,000 | 83,75 |
| Zahnbreite b | mm | 31,25 | 37,50 | 50,00 | 62,50 |
| zulässige Tangentialkraft Ft | N | 3.374 | 4.858 | 8.636 | 13.494 |
| Antriebsmoment M1 | Nm | 67,6 | 98,37 | 172,73 | 269,89 |
| Leistung P | kW | 19,78 | 28,84 | 50,64 | 79,13 |

A.7.16 Erforderliche Zahnbreite

provisorisch, weil andererseits dw1 = m * z1 sein muss

m = 2,5 mm

z2 = z1 * i = 22 * 3,8 = 83,6  84

dw1 = m * z1 = 2,5 mm * 22 = 55 mm dw2 = m * z2 = 2,5 mm * 84 = 210 mm

p =  * m =  * 2,5 mm = 7,854 mm



F =  FP 

P = 20 kW

P = 30 kW

m = 3 mm

z2 = z1 * i = 18 * 3,8 = 68,4  68

dw1 = m * z1 = 3 mm * 18 = 54 mm dw2 = m * z2 = 3 mm * 68 = 204 mm

p =  * m =  * 3 mm = 9,425 mm

P = 20 kW

P = 30 kW

m = 4 mm

z2 = z1 * i = 14 * 3,8 = 53,2  53

dw1 = m * z1 = 4 mm * 14 = 56 mm dw2 = m * z2 = 4 mm * 53 = 212 mm

p =  * m =  * 4 mm = 12,566 mm



F =  FP 

P = 20 kW

P = 30 kW

m = 5 mm

Die Zähnezahl des Ritzels liegt unterhalb der Mindestzähnezahl

|  | m = 2,5mm | m = 3 mm | m = 4 mm | m = 5 mm |
| --- | --- | --- | --- | --- |
| Zähnezahl antreibendes Rades z1 | 22 | 18 | 14 | 11 |
| Zähnezahl angetriebenes Rades z2 | 84 | 68 | 53 |  |
| Unterschnitt? | O ja  nein | O ja  nein | O ja  nein |  ja O nein |
| tats. Übersetzungsverhältnis itats | 3,818 | 3,778 | 3,786 |  |
| i [%] | 0,474 | 0,579 | 0,368 |  |
| Wälzkreisdurchmesser dw1 [mm] | 55,000 | 54,000 | 56,000 |  |
| Wälzkreisdurchmesser dw2 [mm] | 210,000 | 204,000 | 212,000 |  |
| tats. Achsabstand atats [mm] | 132,500 | 129,000 | 134,000 |  |
| a [mm] | 0,500 | 3,000 | 2,000 |  |
| Teilung p [mm] | 7,854 | 9,425 | 12,566 |  |
| min. Zahnbreite b [mm] bei 20 kW | 13,228 | 11,228 | 8,120 |  |
| min. Zahnbreite b [mm] bei 30 kW | 19,843 | 16,842 | 12,180 |  |

A.7.17 Zweistufiges Zahnradgetriebe

 z2 = z1 * i = 17 * 4,47 = 75,99 ≈ 76 (ganzzahlig gerundet)

Eingangsstufe: p = m * π = 2,5 mm * π = 7,854 mm

d = m * z d1 = 2,5 mm * 17 = 42,500 mm

d2 = 2,5 mm * 76 = 190,000 mm

db = d * cos α db1 = 42,500 mm * cos 20° = 39,937 mm

db2 = 190,000 mm * cos 20° = 178,542 mm

da = d + 2 * m da1 = 42,500 mm + 2 * 2,5 mm = 47,500 mm

da2 = 190,000 mm + 2 * 2,5 mm = 195,000 mm

Gl. 7.55

 1



F = YF*Y*YS*KA*KV*KF*KF * Gl. 7.67

F =

Endstufe: p = m * π = 4 mm * π = 12,566 mm

d = m * z d1 = 4 mm * 17 = 68,000 mm

d2 = 4 mm * 76 = 304,000 mm

db = d * cos α db1 = 68,000 mm * cos 20° = 63,899 mm

db2 = 304,000 mm * cos 20° = 285,667 mm

da = d + 2 * m da1 = 68,000 mm + 2 * 4 mm = 76,000 mm

da2 = 304,000 mm + 2 * 4 mm = 312,000 mm

 1



F = YF*Y*YS*KA*KV*KF*KF *

F =

|  |  | |  | Eingangsstufe | | Endstufe | |
| --- | --- | --- | --- | --- | --- | --- | --- |
|  |  | |  | Ritzel  Antriebs-welle | Großrad  Zwischen-welle | Ritzel  Zwischen-welle | Großrad  Abtriebs-welle |
| Modul | | m | mm | **2,5** | | **4** | |
| Übersetzungsverhältnis | | i | - | 4,47 | | 4,47 | |
| Zähnezahl | | z | - | **17** | 76 | **17** | 76 |
| Teilung | | p | mm | 7,854 | | 12,566 | |
| Wälzkreisdurchmesser | | d | mm | 42,500 | 190,000 | 68,000 | 304,000 |
| Grundkreisdurchmesser | | db | mm | 39,937 | 178,542 | 63,899 | 285,667 |
| Achsabstand | | a | mm | 116,250 | | 186,000 | |
| Kopfkreisdurchmesser | | da | mm | 47,500 | 195,000 | 76,000 | 312,000 |
| Überdeckungsgrad | | εα | - | 1,667 | | 1,667 | |
| Tangentialkraft | | Ft | N | 7.498 | | 20.921 | |
| Zahnfußspannung | | σF | N/mm² | 422 | | 460 | |

Die Geometriedaten der Endstufe hätten auch einfach über den Dreisatz aus den Zahlenwerten der Eingangsstufe mit dem Faktor mEndstufe / mEingangsstufe = 4 / 2,5 abgeleitet werden können: Die Endstufe ist nur eine lineare Vergrößerung der Eingangsstufe. Auch die Berechnung der Profilüberdeckung bleibt als Verhältnismäßigkeit genau erhalten.

A.7.18 Getriebe mit zwei Übersetzungsverhältnisse

**Verzahnungsgeometrie**

Zahnradpaar Übersetzung 1:2

z1 = 17 z2 = z1 * i = 17 * 2 = 34

p = m *  = 1,5 mm *  = 4,712 mm

d1 = m * z1 = 1,5 mm * 17 = 25,500 mm d2 = m * z2 = 1,5 mm * 34 = 51,000 mm

Kontrollrechnung:

db1 = d1 * cos  = 25,500 mm * cos 20° = 23,962 mm

db2 = d2 * cos  = 51,000 mm * cos 20° = 47,924 mm

| Übersetzung ins Langsame |  |  | Rad 1 | Rad 2 |
| --- | --- | --- | --- | --- |
| Zähnezahl | z |  | 17 | 34 |
| Teilung | p | [mm] | 4,712 | |
| Wälzkreisdurchmesser | d | [mm] | 25,500 | 51,000 |
| Grundkreisdurchmesser | db | [mm] | 23,962 | 47,924 |
| Achsabstand | a | [mm] | 38,250 | |

Zahnradpaar Übersetzung 1:1

i = 1:1  z1 = z2 = z

Achsabstand wie zuvor

nicht realisierbar, weil Zähnezahl eine natürliche Zahl sein muß

deshalb: z1 = 25 z2 = 26 (oder umgekehrt)

oder: Summe der Zähnezahlen bleibt erhalten

i = 1:2 zges = z1 + z2 = 17 + 34 = 51

i = 1:1 zges = 51 = z1 + z2 = 25 + 26

d1 = m * z1 = 1,5 mm * 25 = 37,500 mm

d2 = m * z2 = 1,5 mm * 26 = 39,000 mm

db1 = d1 * cos  = 37,500 mm * cos 20° = 35,238 mm

db2 = d2 * cos  = 39,000 mm * cos 20° = 36,648 mm

| Übersetzung 1:1 |  |  | Rad 1 | Rad 2 |
| --- | --- | --- | --- | --- |
| Zähnezahl | z |  | 25 | 26 |
| Teilung | p | [mm] | 4,712 | |
| Wälzkreisdurchmesser | d | [mm] | 37,500 | 39,000 |
| Grundkreisdurchmesser | db | [mm] | 35,238 | 36,648 |
| Achsabstand | a | [mm] | 38,250 | |

**Zahnbreite**



Zahnfußspannung bei Übersetzungsverhältnis 1:1

F = YF*Y*YS*KA*KV*KF*KF

Zahnfußspannung bei Übersetzungsverhältnis 1:2

F = YF*Y*YS*KA*KV*KF*KF

|  | 1:1 | 1:2 |
| --- | --- | --- |
| minimale Zahnbreite b [mm] | 14,4 | 21,2 |
