# Supplementary material
Source: publisher site journal article supplement (https://www.degruyterbrill.com/publication/isbn/9783110692143/downloadAsset/9783110692143_Zusatzmaterial_Basiswissen.zip)
Supplement: Supplementary file 33 [file Basiswissen 3. Auflage, Lösungen Kap. 0.doc]

Basiswissen Maschinenelemente
Lösungen

3. Auflage

von
Prof. Dr.-Ing. Hubert Hinzen

Hochschule Trier, Fachbereich Technik

Oldenbourg Verlag München Wien Vers. 1.0

Lösungen zu Kapitel 0 „Grundlagen der Mechanik“

Grundlagen der Mechanik

A.0.1 Schiefe Ebene

Gl. 0.1

→

→

| Wie groß ist die Gewichtskraft? | FG | N | 1.177 |
| --- | --- | --- | --- |
| Wie groß ist die Normalkraft, mit der die Walze senkrecht auf die schiefe Ebene drückt? | FN | N | 1.106 |
| Wie groß ist die Hangabtriebskraft? | FH | N | 403 |

A.0.2 Gleichgewicht mit drei Seilkräften

Gl. 0.1

Am Knotenpunkt der drei Seile wird das (zweidimensionale) Gleichgewicht aller angreifenden Kräfte formuliert. Dazu wird formal sowohl das Gleichgewicht in x-Richtung als auch in y-Richtung aufgestellt:

∑Fx = 0:

∑Fy = 0:

Damit entsteht ein System von zwei Gleichungen mit zwei Unbekannten. Die erste Gleichung lässt sich nach S2 auflösen:

Setzt man diesen Ausdruck in die zweite Gleichung ein, so erhält man eine Gleichung mit einer Unbekannten:

Mit diesem Ergebnis wird die Gleichung für S2 wieder aufgegriffen:

Die Aufgabe fragt nach den gleichgewichthaltenden Massen:

→ Gl. 0.1

| m1 | kg | 8,45 | m2 | kg | 10,0 |
| --- | --- | --- | --- | --- | --- |

A.0.3 Öse an der Decke

Zur Ermittlung der Längskraft wird das Gleichgewicht in y-Richtung aufgestellt:

Zur Ermittlung der Querkraft wird das Gleichgewicht in x-Richtung aufgestellt:

Das Moment ergibt sich aus Querkraft und deren Hebelarm:

für h = 100 mm: Gl. 0.9

für h = 200 mm:

| Wie groß ist ... |  | h = 100mm | h = 200mm |
| --- | --- | --- | --- |
| ... die Längskraft in der Öse? | N | 645 | 645 |
| ... die Querkraft in der Öse? | N | 37,9 | 37,9 |
| ... das Biegemoment an der Einspannstelle der Öse? | Nm | 3,79 | 7,58 |

A.0.4 Steg

Gl. 0.1

Für x= 0 wird die gesamte Gewichtskraft am uferseitigen Gelenk übertragen und die Stütze wird nicht belastet

Für x= 3.550 mm wird die gesamte Gewichtskraft als Druckkraft an der Stütze übertragen und das uferseitigen Gelenk bleibt lastfrei.

Für x= 1.750 mm teilt sich die Gewichtskraft wegen der Symmetrie der Abstützung je zur Hälfte auf das uferseitige Gelenk und die Stütze auf.

Für x= 5.325 mm werden die Auflagerkräfte in dem einen Gelenk durch das Momentengleichgewicht am anderen Gelenk bestimmt:

ΣMGelenk Ufer = 0:

ΣMGelenk Stütze = 0:

| x | mm | 0 | 1.775 | 3.550 | 5.325 |
| --- | --- | --- | --- | --- | --- |
| FGelenk Ufer | N | 784,8 | 392,4 | 0 | 392,4 |
| FGelenk Stütze |  | 0 | 392,4 | 784,8 | 1.177,2 |

A.0.5 Spannungs-Dehnungs-Diagramm

mit Gl. 0.20

bei F = 5 kN:

Bei dieser Spannung treten nur elastische Verformungen auf, deshalb ist die Verformung vorteilhafterweise im linken Diagramm abzulesen: elast = 0,65 * 10-3

Lelast = elast * L0 = 0,65 * 10-3 * 150 mm = 0,096 mm Gl. 0.21

bei F = 10 kN:

ebenfalls aus linken Diagramm abgelesen: nur elastische Dehnung mit elast = 1,30 * 10-3

Lelast = elast * L0 = 1,30 * 10-3 * 150 mm = 0,195 mm

bei F = 20 kN:

- Da die Verformung im teilplastischen Bereich liegt, muß im rechten Diagramm abgelesen werden.
- Die waagerechte Linie für  = 556 N/mm² wird mit der Werkstoffkennlinie zum Schnitt gebracht, wodurch der aktuelle Belastungspunkt entsteht.
- Von diesen Belastungspunkt aus trägt man sowohl eine senkrechte Linie nach unten als auch eine Parallele zur Hook’schen Geraden an.
- Auf der -Achse lässt sich nun eine Gesamtdehnung von ca. ges = 13 * 10-3 ablesen. Dabei ergibt sich zwischen dem Koordinatenursprung und der Parallelen zur Hook’schen Geraden der plastische Verformungsanteil mit plast = 10,5 * 10-3 und der elastische Verformungsanteil zwischen Hook’scher Gerade und der Senkrechten der elastische Verformungsanteil mit elast = 2,5 * 10-3 (s. auch Bild 0.6 auf S. 7)

Lelast = elast * L0 = 2,5 * 10-3 * 150 mm = 0,375 mm

Lplast = plast * L0 = 10,5 * 10-3 * 150 mm = 1,575 mm

| Zugkraft | kN | 5 | 10 | 20 |
| --- | --- | --- | --- | --- |
| Zugspannung | N/mm² | 139 | 278 | 556 |
| elast | 10-3 | 0,65 | 1,30 | 2,50 |
| plast | 10-3 | 0 | 0 | 10,50 |
| Lelast | mm | 0,097 | 0,195 | 0,375 |
| Lplast | mm | 0 | 0 | 1,575 |

 Gl. 0.22

Es können beliebige Kombinationen von  und  auf der Hook’schen Geraden eingesetzt werden. Die Kombination für die Zugkraft von 10 kN ist vorteilhaft, weil sie eine größere Ablesegenauigkeit erlaubt als die von 5 kN.

| E [N/mm²] | ca. 214.000 |
| --- | --- |

Belastbarkeit, wenn plastische Verformung ausgeschlossen werden soll:

abgelesen: elastmax = 350 N/mm²

Fmaxelast = maxelast * A = 350 N/mm² * 36 mm² = 12.600 N

Belastbarkeit, wenn plastische Verformung zugelassen wird:

abgelesen: B = 700 N/mm²

Fmaxplast = B * A = 700 N/mm² * 36 mm² = 25.200 N

| Wie groß ist die maximale Kraft Fmax, die diese Werkstoffprobe aufnehmen kann, wenn | |
| --- | --- |
| eine plastische Verformung ausgeschlossen werden soll? | eine plastische Verformung zugelassen wird? |
| Fmaxelast [N] 12.600 | Fmaxplast [N] 25.200 |

A.0.6 Werkstoffvergleich im Spannungs-Dehnungs-Diagramm

| Ordnen Sie die Werkstoffe nach ... | C 45 | S 235 | GG 20 | Keramik | Glas |
| --- | --- | --- | --- | --- | --- |
| ... dem Elastizitätsmodul! | 2/3 | 2/3 | 4 | 1 | 5 |
| ... der Steifigkeit! | 2/3 | 2/3 | 4 | 1 | 5 |
| ... der Streckgrenze! | 2 | 3 | 4 | 1 | 5 |
| ... der Bruchlast! | 2 | 3 | 4 | 1 | 5 |
| ... der maximalen elastischen Dehnung! | 3 | 4 | 2 | 5 | 1 |
| ... der maximalen plastischen Dehnung! | 2 | 1 | 3 | 4/5 | 4/5 |

A.0.7 Zugspannung homogener Werkstoffe

Tabelle 0.2: E335  zul = 325 – 335 N/mm²

A =

Fzul = zul * A = 330 N/mm² * 78,54 mm² = 25.918 N Gl. 0.20

| Eine runde, stabförmige Probe mit 10 mm Durchmesser wird aus E335 (früher St60) gefertigt. Mit welcher Kraft darf sie in Längsrichtung maximal belastet werden, wenn eine plastische Verformung in jedem Fall ausgeschlossen werden soll? | F | N | 25.918 |
| --- | --- | --- | --- |
| Eine quadratische, stabförmige Probe mit 12 mm Kantenlänge besteht aus dem Werkstoff 42CrMo4 und wird mit einer Kraft von 60 kN in Längsrichtung belastet. Wie groß ist die Sicherheit? | S | - | 1,84 |

Tabelle 0.2: 42CrMo4  zul = 765 N/mm²

S = = 1,84 Gl. 0.24

A.0.8 Seilaufhängung

σ = E * ɛ → Gl. 0.22

Stahl:

Kupfer:

Aluminium

Das Kupferseil hat die geringste zulässige Verformung und beschränkt damit die Belastbarkeit der gesamten Anordnung

∆L = L * ɛ = 2.000 mm * 2,400 * 10-3 = 4,800 mm Gl. 0.21

Alle Seile sind über eine gemeinsame Verformung (sowohl relativ als auch absolut) gekoppelt. Nur das Kupferseil wird mit seiner zulässigen Spannung belastet.

σ = E * ɛ Gl. 0.22

Stahl:

Kupfer

Aluminium:

→ S = σ * A Gl. 0.20

Stahl: SSt = σSt * ASt = 504 N * 10 mm² = 5.040 N

Kupfer: SCu = σCu * ACu = 300 N * 20 mm² = 6.000 N

Aluminium: SAlu = σAlu * AAlu = 173 N * 30 mm² = 5.190 N

G = 2 * (SSt + SCu) + SAlu = 2 * (5.040 N + 6.000 N) + 5.190 N = 27.270 N

|  |  |  | Seil 1 | Seil 2 | Seil 3 | Seil 4 | Seil 5 |
| --- | --- | --- | --- | --- | --- | --- | --- |
| Werkstoff |  |  | Stahl | Kupfer | Alu | Kupfer | Stahl |
| zul. Spannung | σzul | N/mm² | 700 | 300 | 200 | 300 | 700 |
| Elastizitätsmodul | E | 105 N/mm² | 2,1 | 1,25 | 0,72 | 1,25 | 2,1 |
| Querschnittsfläche | A | mm² | 10 | 20 | 30 | 20 | 10 |
| relative Verformung |  | 10−3 | 2,400 | 2,400 | 2,400 | 2,400 | 2,400 |
| tatsächliche Spannung | σtats | N/mm² | 501 | 300 | 173 | 300 | 501 |
| absolute Verformung | L | mm | 4,800 | 4,800 | 4,800 | 4,800 | 4,800 |
| Seilkraft | S | N | 5.040 | 6.000 | 5.184 | 6.000 | 5.040 |
| Gesamtbelastung | G | N | 27.270 | | | | |

A.0.9 Flaschenzug

G = m * g = 1.250 kg * 9,81 m/s² = 12.262 N Gl. 0.1

Gleichgewicht an der sog. Unterflasche: Die nach unten gerichtete Gewichtskraft hält vier nach oben gerichteten, untereinander gleich großen Seilkräften das Gleichgewicht:

Gleichgewicht an der sog. Oberflasche: Die nach oben gerichtete Kraft an der Deckenverschraubung hält fünf nach unten gerichteten, untereinander gleich großen Seilkräften das Gleichgewicht:

D = 5 * S = 5 * 3.066 N = 15.328 N

| Wie groß ist die Gewichtskraft? | G | N | 12.262 |
| --- | --- | --- | --- |
| Wie groß ist die Seilkraft, die vom Bediener am freien Seilende aufgebracht werden muss, um das System im Gleichgewicht zu halten? | F | N | 3.066 |
| Wie groß ist die Kraft, mit der der Flaschenzug die Decke belastet? | D | N | 15.328 |

Gl. 0.20 

für Stahl:
für Aluminium:

Gl. 0.22 
für Stahl:

für Aluminium:

Gl. 0.21 

Last unten: L0 = 5 * 12 m = 60 m

Last auf halber Höhe: L0 = 4 * 6 m + 12 m = 36 m

Last oben: L0 = 12 m

für Stahl, Last unten: ΔL = 60 m * 1,429 * 10-3 = 85,7 mm

für Stahl, Last auf halber Höhe: ΔL = 36 m * 1,429 * 10-3 = 51,4 mm

für Stahl, Last oben: ΔL = 12 m * 1,429 * 10-3 = 17,1 mm

für Aluminium, Last unten: ΔL = 60 m * 2,857 * 10-3 = 171,4 mm

für Aluminium, Last auf halber Höhe: ΔL = 36 m * 2,857 * 10-3 = 102,9 mm

für Aluminium, Last oben: ΔL = 12 m * 2,857 * 10-3 = 34,3 mm

|  |  |  | Stahl | Alu |
| --- | --- | --- | --- | --- |
|  | zul | N/mm² | 300 | 200 |
|  | E | N/mm² | 2,1 · 105 | 0,7 · 105 |
| Wie groß muss der metallische Querschnitt im Seil sein, wenn die zulässige Spannung vollständig ausgenutzt werden soll? | A | mm² | 10,220 | 15.330 |
| Das Seil wird mit dem minimal möglichen Querschnitt ausgeführt. Wie groß ist die relative elastische Dehnung, die das Seil bei Aufbringung dieser Last erfährt? | ε | 10-3 | 1,429 | 2,857 |
| Diese Längenänderung soll durch den Bediener am freien Seilende durch zusätzliches Einziehen des Seils ausgeglichen werden. Wie groß ist dieser Seileinzug, wenn sich die Last auf Bodenniveau befindet? | L  Last unten | mm | 85,7 | 171,4 |
| Wie groß ist dieser zusätzliche Seileinzug, wenn sich die Last auf halber Höhe befindet, der Bediener aber nach wie vor auf dem Boden steht? | L  Last halbe Höhe | mm | 51,4 | 102,9 |
| Wie groß ist dieser zusätzliche Seileinzug, wenn sich die Last in höchstmöglicher Stellung befindet? | L  Last oben | mm | 17,1 | 34,3 |

A.0.10 U-Profil nach Norm

Gl. 0.31

Mb = F * L = 300 N * 700 mm = 210 Nm Gl. 0.9

Wax nach Tabelle Bild 0.17; Kraft wirkt in y-Richtung, Biegemoment als Kreuzprodukt von Kraft und Hebelarm wirkt in z-Richtung, deshalb Wz ansetzen

Tabelle 0.2: S335: Re = 345 N/mm² S = Gl. 0.33

Last hätte im theoretischen Grenzfall um 41 % gesteigert werden können, ohne das Bauteil zu gefährden.

| Wie groß ist die größte auftretende Biegespannung? | σb |  | 244 |
| --- | --- | --- | --- |
| Wie groß ist die Sicherheit bezüglich dieser Biegespannung, wenn der Werkstoff S335 (früher St52-3, Werkstoff-Nr. 1.0570) verwendet wird? | S | - | 1,41 |

A.0.11 I-Profil nach Norm

b = Gl. 0.31

Mb = F * L = 4.380 N * 1.435 mm = 6.285 Nm Gl. 0.9

Tabelle 0.2: S275: Re = 265 - 275 N/mm²

Kraftangriffsrichtung a:

Wax nach Tabelle Bild 0.15; Kraft wirkt in z-Richtung, Biegemoment als Kreuzprodukt von Kraft und Hebelarm wirkt in y-Richtung, deshalb Wy ansetzen

hält stand Gl. 0.33

Last hätte im theoretischen Grenzfall auf 235 % (also auf 4.380 N * 2,34 = 10.249 N) gesteigert werden können, ohne das Bauteil zu gefährden.

|  | | | Kraftangriffsrichtung | |
| --- | --- | --- | --- | --- |
|  |  |  | a | b |
| Wie groß ist das größte auftretende Biegemoment | Mbmax | Nm | 6.285 | 6.285 |
| Wie groß ist die größte auftretende Biegespannung? | σb |  | 115 | 848 |
| Wie groß ist die Sicherheit bezüglich dieser Biegespannung, | S | - | 2,35 | 0,32 |
| Hält das Bauteil dieser Belastung stand? |  |  | **** ja  O nein | O ja  **** nein |

Kraftangriffsrichtung b:

Wax nach Tabelle Bild 0.15; Kraft wirkt in y-Richtung, Biegemoment als Kreuzprodukt von Kraft und Hebelarm wirkt in z-Richtung, deshalb Wz ansetzen

hält nicht stand

Last hätte im theoretischen Grenzfall auf 32 % gesenkt werden müssen, um das Bauteil nicht zu gefährden.

A.0.12 Hubvorrichtung mit starrem Ausleger

An der Rolle wirkt die Seilkraft mit 11.772 N sowohl nach unten als auch nach links (Reaktionskraft im Seil). Diese beiden Kräfte können in die Rollenachse parallelverschoben werden. Da diese Parallelverschiebung mit jeweils gleichem Abstand (= Hebelarm) erfolgt, heben sich die durch die Parallelverschiebung entstehenden Momente gegenseitig auf. Es ergibt sich also eine resultierende Kraft von 16.648 N, die an der Rollenachse unter einem Winkel von 45° nach links unter angreift.

Die graphische Auftragung wird vereinfacht, wenn man die x- und y-Komponente der an der Rolle angreifenden Kraft zunächst getrennt betrachtet und anschließend beide Biegemomentenverläufe überlagert.

Das größte Biegemoment tritt an der Verbindungsstelle des waagerechten mit dem linken senkrechten Balken auf.

Mbmax = 11.772 N * (400 mm + 1.200 mm) = 18,84 * 106 Nmm Gl. 0.9

 Gl. 0.31

beispielsweise I 180 nach DIN 1025 T1 oder IPB 120 nach DIN 1025 T2, jeweils „hochkant“ angeordnet

| Berechnen Sie das größte Biegemoment! | Mbmax | Nm | | 18.840 |
| --- | --- | --- | --- | --- |
| Die zulässige Biegespannung beträgt bzul = 150 N/mm². Welches minimale Widerstandsmoment ist erforderlich, um die Belastrung aufzunehmen? | Waxmin | 103 mm3 | | 125,6 |
| Wählen Sie durch Ankreuzen ein genormtes, „hochkant“ angeordnetes I-Profil aus, welches das vorliegende Biegemoment aufnehmen kann. | entweder  DIN 1025 T1  O I 160  **** I 180  O I 200 | | oder  DIN 1025 T2  O I 100  **** I 120  O I 140 | |

A.0.13 Hubvorrichtung mit höhenverstellbarem Ausleger

In der waagerechten Lage des Auslegers ( = 0°) wirkt die lastbedingte Kraft am linken Ende des Balkens normal zum Balken und verursacht damit die größte Biegemomentenbelastung.

Das größte Biegemoment tritt am Anlenkpunkt des Hubzylinders auf.

Mbmax = 2.200 kg * 9,81 m/s² * 1.000 mm = 21,582 * 106 Nmm Gl. 0.9

Gl. 0.31 

Jedes der beiden nebeneinander liegenden Profile muß also ein minimales Widerstandsmoment aufweisen. Das Profil U 200 nach DIN 1026 mit 191.000 mm³ erfüllt diese Bedingung.

| In welcher Stellung  erfährt der Ausleger seine höchste Biegebeanspruchung? |  | ° | 0 |
| --- | --- | --- | --- |
| Wie groß ist in dieser Stellung das größte auf den Ausleger wirkende Biegemoment? | Mbmax | Nm | 21.582 |
| Welches Widerstandsmoment müssen dann beide U-Träger gemeinsam mindestens aufweisen? | Waxmin | mm³ | 359.700 |
| Welcher normgerechte U-Stahl (Kurzzeichen) muss dann verwendet werden? | - | - | U 200 |

A.0.14 Rollenlaufbahn

F = m * g = 1.500 kg * 9,81 m/s² = 14.715 N; Gl. 0.9

teilt sich in der kritischen Stellung je zur Hälfte auf das linke und rechte Auflager auf

Wax = 144.000 mm³ Bild 0.16

| Welche Stellung der Katze x ist für die Belastung des horizontalen Trägers (Pos. 1) kritisch? Geben Sie x in Funktion der noch nicht berechneten Länge a an. | x = f(a) | - |  |
| --- | --- | --- | --- |
| Wie weit dürfen die Befestigungspunkte des horizontalen Trägers (Pos. 1) für einen Laufbahnabschnitt amax maximal auseinander liegen? | amax | mm | 5.710 |

A.0.15 Widerstandsmomente nach Grundmustertabelle, Rechteckquerschnitt

(sämtliche Ergebnisse in mm4) Tabelle Bild 0.19

|  | Voll-  querschnitt | mitteldicke Wandstärke | mitteldünne Wandstärke | dünne  Wandstärke |
| --- | --- | --- | --- | --- |
| quer | = 104.167 | = 281.662 | = 327.132 | = 1.885.417 |
| Qua-drat | = 333.293 | = 444.185 | = 866.667 | = 3.341.667 |
| hoch-kant | = 1.066.667 | = 540.047 | = 771.606 | = 4.797.917 |

(sämtliche Ergebnisse in mm3) Gl. 0.31

|  | Voll-  querschnitt | mitteldicke Wandstärke | mitteldünne Wandstärke | dünne  Wandstärke |
| --- | --- | --- | --- | --- |
| quer | = 8.333 | = 14.261 | = 16.357 | =50.278 |
| Qua-drat | = 14.906 | = 18.393 | = 28.889 | = 63.651 |
| hoch-kant | = 26.667 | = 19.638 | = 24.527 | = 71.080 |

(sämtliche Ergebnisse in N/mm2) Gl. 0.31

|  | Voll-  querschnitt | mitteldicke Wandstärke | mitteldünne Wandstärke | dünne  Wandstärke |
| --- | --- | --- | --- | --- |
| quer |  |  |  |  |
| Qua-drat |  |  |  |  |
| hoch-kant |  |  |  |  |

Gesamtzusammenstellung:

|  |  |  | Voll-querschnitt | mitteldicke Wandstärke | mitteldünne Wandstärke | dünne Wandstärke |
| --- | --- | --- | --- | --- | --- | --- |
| quer | Iaxy  Waxy  σb | mm4  mm3  N/mm2 | 104.167  8.333  1.200 | 281.662  14.261  701 | 327.132  16.357  611 | 1.885.417  50.278  199 |
| Qua-drat | Iaxy  Waxy  σb | mm4  mm3  N/mm2 | 333.293  14.906  671 | 444.185  18.393  544 | 866.667  28.889  346 | 3.341.667  63.651  157 |
| hoch-kant | Iaxy  Waxy  σb | mm4  mm3  N/mm2 | 1.066.667  26.667  375 | 540.047  19.638  509 | 771.606  24.527  408 | 4.797.917  71.080  141 |

A.0.16 Lochzange für Leder

Gl. 0.39 →

Die Schubfläche ist die Mantelfläche der ausgestanzten Ronde.

Hebelgesetz:

|  | Lochdurchmesser | mm | 2,0 | 2,5 | 3,0 | 3,5 | 4,0 |
| --- | --- | --- | --- | --- | --- | --- | --- |
| a | Stanzkraft | N | 226 | 283 | 339 | 396 | 452 |
| b | Handkraft | N | 47 | 59 | 70 | 82 | 94 |

A.0.17 Kreuzförmiger Schraubschlüssel

**Torsion:**

Gl. 0.55 oder Bild 0.25

Gl. 0.54

**Biegung:**

Gl. 0.9

Bild 0.19

Gl. 0.31

| Welches **Torsions**moment kann maximal in Verlängerung der Schraubenachse auftreten? | | Nm | 520 |
| --- | --- | --- | --- |
| Wie groß ist das polare Widerstandsmoment des auf Torsion belasteten Abschnitts? | | mm³ | 3.068 |
| Wie hoch ist die maximale Torsionsspannung? | | N/mm² | 169,5 |
| Wie groß ist das **Biege**moment an der festigkeitsmäßig kritischen Stelle des querstehenden Hebelarmes? | | Nm | 210 |
| Wie groß ist das axiale Widerstandsmoment an dieser Stelle? | | mm³ | 1.534 |
| Wie groß ist die maximale Biegespannung? | | N/mm² | 136,9 |
| An welcher Stelle wird der Schraubschlüssel bei Überlast versagen, wenn bedacht wird, dass bei den hier verwendeten Werkstoffen die zulässige Schubspannung in aller Regel geringer ist als die zulässige Biegespannung? | **** in der Verlängerung  der Schraubenachse  O am Querhebel | | |

A.0.18 Widerstandsmomente nach Grundmustertabelle, Kreisquerschnitt

**Biegung:**

Vollquerschnitt: Wax = Bild 0.19

Gl. 0.31

dickwandiges Rohr: Wax =

dünnwandiges Rohr: Wax =

= 50.370 mm³

**Torsion:**

Vollquerschnitt: Wpol = Bild 0.25

Gl. 0.54

dickwandiges Rohr: Wpol =

dünnwandiges Rohr: Wpol =

= 100.739 mm³

|  |  |  | Voll-querschnitt | dickwandiges  Rohr | dünnwandiges  Rohr |
| --- | --- | --- | --- | --- | --- |
| Biegung | Wax  σb | mm3  N/mm2 | 12.614  793 | 16.911  591 | 50.370  199 |
| Torsion | Wt  τt | mm3  N/mm2 | 25.227  396 | 33.822  296 | 100.739  99 |

Die Spannungen sinken mit dünnerer Wandstärke

Die Beträge der Torsionsspannungen sind stets halb so hoch wie die der Biegespannungen
