# Supplementary material
Source: publisher site journal article supplement (https://www.degruyterbrill.com/publication/isbn/9783110692143/downloadAsset/9783110692143_Zusatzmaterial_Basiswissen.zip)
Supplement: Supplementary file 34 [file Basiswissen 3. Auflage, Lösungen Kap. 1,.doc]

Basiswissen Maschinenelemente
Lösungen

3. Auflage

von
Prof. Dr.-Ing. Hubert Hinzen

Hochschule Trier, Fachbereich Technik

Oldenbourg Verlag München Wien Vers. 1.0

Lösungen zu Kapitel 1 „Achsen, Wellen, Betriebsfestigkeit“

Lösungen:
Achsen, Wellen, Betriebsfestigkeit

Zusammengesetzte Spannungen

A.1.1 Transporteinrichtung mit Laufkatze

O höchste Belastung am oberen Ende des Trägers

O höchste Belastung am unteren Ende des Trägers

**** das obere und untere Ende des Trägers erfahren die gleiche Belastung

Gewichtskraft: Gl. 0.1

Zugspannung: Gl. 0.20 für alle Stellungen

Biegespannung: Gl. 0.31 für x = 0

für x = 200 mm

für x = 400 mm

Gesamtspannung:

Gl. 1.1 für x = 0

für x = 200 mm

für x = 400 mm

|  |  | für x = 0 | für x = 200 mm | für x = 400 mm |
| --- | --- | --- | --- | --- |
| Z | N/mm² | 12,1 | 12,1 | 12,1 |
| b | N/mm² | 0 | 69,8 | 139,7 |
|  |  |  |  |  |
| ges | N/mm² | 12,1 | 81,9 | 151,8 |

| xmax | mm | 309 |
| --- | --- | --- |

Quasistatische Vergleichsspannung

A.1.2 Kran mit I-Trägern

Gewichtskraft: G = m * g = 8.000 kg * 9,81 m/s² = 78.480 N

Winkel des schräg ansteigenden Seils gegenüber der Horizontalen:

Kraft am Mittelpunkt der Seilscheibe:

Fresx = G * cos  = 78.480 N * cos 14,26° = 76.062 N

Fresy = G * (1 - sin ) = 78.480 N * (1 – sin 14,26°) = 59.149 N

L = Fresx = 76.062 N

Q = Fresy = 59.149 N

Mb = Fresy * L = 59.149 N * 3.140 mm = 185.728 Nm

Gl. 1.3 und 1.4

| L [N] = 76.062  Q [N] = 59.149  Mb [Nm] =185.728 | ZD [N/mm²] = 7,1  Q [N/mm²] = 5,5  b [N/mm²] = 210,1 |
| --- | --- |
|  | v [N/mm²] = 217,4 |

A.1.3 Bohrrohr für Erdbohrungen

einwandiges Rohr:

mit Bild 0.25

Gl. 0.20

Gl. 0.54

Gl. 1.3

doppelwandiges Rohr:

Die Widerstandsmomente der beiden Rohre dürfen nicht addiert werden, weil ihre Randfaserabstände unterschiedlich sind. Zur Ermittlung des Gesamtwiderstandsmomentes muss zunächst das Flächenmoment berechnet werden:

Gl. 0.56

|  |  | einwandiges Rohr | doppelwandiges Rohr |  |  |
| --- | --- | --- | --- | --- | --- |
| Mt | kNm | 360 | 585 | kNm | Mt |
| FD | kN | 300 | 490 | kN | FD |
| D | mm | 368 | 600 | mm | Da |
| d | mm | 333 | 576 | mm | da |
|  |  |  | 536 | mm | Di |
|  |  |  | 520 | mm | di |
| A | mm² | 19,27*103 | 35,44*103 | mm² | A |
| Wpol | mm³ | 3,224*106 | 9,473*106 | mm³ | Wpol |
| D | N/mm² | 15,57 | 13,83 | N/mm² | D |
| t | N/mm² | 111,7 | 61,75 | N/mm² | t |
| V | N/mm² | 194,1 | 107,9 | N/mm² | V |

A.1.4 Steinschleuder

| Mit welcher Gesamtkraft kann der abzuschießende Körper maximal nach hinten gezogen werden, wenn im Gummizug eine Spannung von 30 N/mm² nicht überschritten werden darf? | N | 259,2 |
| --- | --- | --- |

Stelle 1 (Handgriff):

Gl. 0.9

Gl. 0.39

Gl. 0.31

Gl. 1.3

Stelle 2 (Gabel):

|  | L | Q | Mb | Mt | σZD | τQ | σb | τt | σV |
| --- | --- | --- | --- | --- | --- | --- | --- | --- | --- |
| Stelle | N | N | Nm | Nm |  |  |  |  |  |
| 1 Handgriff | 0 | 259,2 | 22,55 | 0 | 0 | 0,83 | 28,71 | 0 | 28,74 |
| 2 Gabel | 0 | 129,6 | 3,89 | 10,37 | 0 | 0,84 | 14,43 | 19,24 | 37,66 |

Unterscheidung statische-dynamische Spannung

A.1.5 Wagenachse

a. Biegemoment am Rad gleich null, an der Abstützung am Wagen Maximalwert, zwischen den beiden Abstützpunkten konstant

b. Mbmax = = 135,5 Nm

c. 

in diesem Fall Biegung als statische Belastung mit σzul = 120 N/mm²

d. in diesem Fall Umlaufbiegung, d.h. wechselnde Belastung mit σzul = 60 N/mm²

A.1.6 Belastung einer Achse in Abhängigkeit von der Lagerung

→

Variante 1:

→

Variante 2:

→

Variante 3:

→

Variante 4:

→

|  | statisch? dynamisch? | Mbzul [Nm] | Fzul [N] |
| --- | --- | --- | --- |
| Variante 1 | **** O | 78,54 | 785 |
| Variante 2 | O **** | 54,98 | 1.100 |
| Variante 3 | **** O | 78,54 | 1.570 |
| Variante 4 | O **** | 54,98 | 550 |

A.1.7 Belastung von Achsen und Wellen

Sämtliche im Rahmen dieser Aufgabe betrachteten Achsen und Wellen weisen den Durchmesser von 20 mm auf, so daß sowohl die Querschnittsfläche als auch das axiale und polare Widerstandsmoment vorab berechnet werden können:

Bild 0.19

Gl. 0.55 bzw. Bild 0.25

a. Stillstehende Achse

Gl. 0.39

Gl. 0.32

Gl. 1.3

|  | L [N] = 0  Q [N] = 490,5  Mb [Nm] = 24,53  Mt [Nm] = 0 | ZD [N/mm²] = 0  Q [N/mm²] = 1,6  b [N/mm²] = 31,2  t [N/mm²] = 0 |
| --- | --- | --- |
|  |  | v [N/mm²] = 31,3 |

b. Stillstehende Welle mit doppelarmigem Hebel

Torsion wird querkraft- und biegemomentenfrei eingeleitet

Gl. 0.54

|  | L [N] = 0  Q [N] = 0  Mb [Nm] = 0  Mt [Nm] = 49,0 | ZD [N/mm²] = 0  Q [N/mm²] = 0  b [N/mm²] = 0  t [N/mm²] = 31,2 |
| --- | --- | --- |
|  |  | v [N/mm²] = 54,0 |

c. Stillstehende Welle mit einarmigem Hebel

Q, Q, Mb und b wie unter a.

t wie unter b.

|  | L [N] = 0  Q [N] = 490,5  Mb [Nm] = 24,53  Mt [Nm] = 49,0 | ZD [N/mm²] = 0  Q [N/mm²] = 1,6  b [N/mm²] = 31,2  t [N/mm²] = 31,2 |
| --- | --- | --- |
|  |  | v [N/mm²] = 64,8 |

d. Drehende Welle mit einarmigem Hebel

 = 0° wie c.

 = 90° wie a.

 = 180° wie bei  = 0°

 = 270° wie bei  = 90°

|  |  |  = 0° |  = 90° |  = 180° |  = 270° |
| --- | --- | --- | --- | --- | --- |
|  | Q [N] | 490,5 | 490,5 | 490,5 | 490,5 |
|  | Q [N/mm²] | 1,6 | 1,6 | 1,6 | 1,6 |
|  | Mb [Nm] | 24,53 | 24,53 | 24,53 | 24,53 |
|  | b [N/mm²] | 31,2 | 31,2 | 31,2 | 31,2 |
|  | Mt [Nm] | 49,0 | 0 | 49,0 | 0 |
|  | t [N/mm²] | 31,2 | 0 | 31,2 | 0 |
|  |  |  |  |  |  |
|  | V [N/mm²] | 64,8 | 31,3 | 64,8 | 31,3 |

e. Welle mit Zahnriemenscheibe

Q wie unter a.; Q dynamisch, weil sich die Welle unter der raumfesten Last hinwegdreht

Mb wie unter c.; b dynamisch wegen Umlaufbiegung

Mt wie unter c.; t statisch, weil von der Winkelstellung unabhängig

|  |  | statisch | dynamisch |
| --- | --- | --- | --- |
|  | L [N] = 0 | ZDstat [N/mm²] = 0 | ZDdyn [N/mm²] = 0 |
|  | Q [N] = 490,5 | Qstat [N/mm²] = 0 | Qdyn [N/mm²] = 1,6 |
|  | Mb [Nm] = 24,53 | bstat [N/mm²] = 0 | bdyn [N/mm²] = 31,2 |
|  | Mt [Nm] = 49,0 | tstat [N/mm²] = 31,2 | tdyn [N/mm²] = 0 |
|  |  | vstat [N/mm²] = 54,0 | vdyn [N/mm²] = 31,3 |

f. Senkrechte Achse mit einarmigem Hebel

Die Masse ist sowohl der Erdbeschleunigung als auch einer Zentrifugalbeschleunigung ausgesetzt:

Das Biegemoment setzt sich aus der Längskraft am Hebelarm 100 mm und der Zentrifugalkraft am Hebelarm 50 mm zusammen:

sämtliche Belastungen statisch, da Belastung und Welle stets in gleicher Phasenlage

|  |  | statisch | dynamisch |
| --- | --- | --- | --- |
|  | L [N] = 490,5 | ZDstat [N/mm²] = 1,6 | ZDdyn [N/mm²] = 0 |
|  | Q [N] = 548,3 | Qstat [N/mm²] = 1,7 | Qdyn [N/mm²] = 0 |
|  | Mb [Nm] = 76,47 | bstat [N/mm²] = 97,4 | bdyn [N/mm²] = 0 |
|  | Mt [Nm] = 0 | tstat [N/mm²] = 0 | tdyn [N/mm²] = 0 |
|  |  | vstat [N/mm²] = 99,0 | vdyn [N/mm²] = 0 |

A.1.8 Welle Kettentrieb

Gl. 0.63

→ Gl. 0.62

Kettenkräfte:

linkes Kettenrad:

rechtes Kettenrad:

Querkraftschub:

linkes Kettenrad:

rechtes Kettenrad:

Biegung:

am linken Lager: Mblinks = Qlinks * 26 mm = 678,6 N * 26 mm = 17,64 Nm

am rechten Lager: Mbrechts = Qrechts * 26 mm = 2.035,7N * 26 mm = 52,93 Nm

Torsion:

an beiden Stellen:

Vergleichsspannung:

am linken Lager statisch:

am linken Lager dynamisch:

am rechten Lager statisch:

am rechten Lager dynamisch:

| linkes Lager | statisch | dynamisch |
| --- | --- | --- |
| L [N] = 0 | ZDstat [N/mm²] = 0 | ZDdyn [N/mm²] = 0 |
| Q [N] = 678,6 | Qstat [N/mm²] = 0 | Qdyn [N/mm²] = 2,2 |
| Mb [Nm] = 17,64 | bstat [N/mm²] = 0 | bdyn [N/mm²] = 22,5 |
| Mt [Nm] = 78,13 | tstat [N/mm²] = 49,7 | tdyn [N/mm²] = 0 |
|  | vstat [N/mm²] = 86,1 | vdyn [N/mm²] = 22,8 |

| rechtes Lager | statisch | dynamisch |
| --- | --- | --- |
| L [N] = 0 | ZDstat [N/mm²] = 0 | ZDdyn [N/mm²] = 0 |
| Q [N] = 2.035,7 | Qstat [N/mm²] = 0 | Qdyn [N/mm²] = 6,5 |
| Mb [Nm] = 52,93 | bstat [N/mm²] = 0 | bdyn [N/mm²] = 67,4 |
| Mt [Nm] = 78,13 | tstat [N/mm²] = 49,7 | tdyn [N/mm²] = 0 |
|  | vstat [N/mm²] = 86,1 | vdyn [N/mm²] = 68,3 |

A.1.9 Smith-Diagramm

Definitionen: Gl. 1.5



σdyn = σo – σstat =150 N/mm² - 100 N/mm² = 50 N/mm²

einzeichnen des Lastpunktes mit σstat = 100 N/mm² und σdyn = 50 N/mm²

**standardisierte Werkstoffprobe:**

Werkstoff C35 (Tab. 1.2):

bS = 450 N/mm² bSch = 450 N/mm² bW = 300 N/mm²

Gl. 1.14

Gl. 1.15

Gl. 1.17

Gl. 1.16

**erste Verkleinerung:**

Werkstoffprobe mit  50 mm: bG = 0,805 Bild 1.15

bS‘ = bG * bS = 0,805 * 450 N/mm² = 362 N/mm² Gl. 1.6

bSch‘ = bG * bSch = 0,805 * 450 N/mm² = 362 N/mm² Gl. 1.7

bW‘ = bG * bW = 0,805 * 300 N/mm² = 241 N/mm² Gl. 1.8

**zweite Verkleinerung:**

Werkstoffprobe mit  50 mm und bO = 0,8 sowie k = 2,5:

bS‘ bleibt erhalten, weil ohne dynamischen Anteil

GAK = * AK‘ Gl. 1.11

GAK = * 180 (aus Diagramm abgelesen) = 58

GbW = * bW‘ = * 241 = 78 Gl. 1.10

| Wie groß ist die Sicherheit gegenüber Dauerbruch für eine standardisierte Werkstoffprobe? |  10 mm  bO = 1  k = 1 | SI = 4,00  SII = 5,40  SIII = 3,00 |
| --- | --- | --- |
| Wie groß sind die Sicherheiten, wenn eine Probe von 50 mm Durchmesser untersucht wird? |  50 mm  bO = 1  k = 1 | SI = 3,20  SII = 4,40  SIII = 2,41 |
| Wie groß sind die Sicherheiten, wenn eine Probe von 50 mm Durchmesser untersucht wird und wenn eine reale Oberfläche und eine Kerbwirkung angenommen werden? |  50 mm  bO = 0,8  k = 2,5 | SI = 2,20  SII = 1,40  SIII = 1,30 |

A.1.10 Dauerfestigkeitsnachweis Kettenradwelle

Gl. 0.63

Gl. 0.62

|  | statisch | dynamisch |
| --- | --- | --- |
| L [N] = 0 | ZDstat [N/mm²] = 0 | ZDdyn [N/mm²] = 0 |
| Q [N] = 600 | Qstat [N/mm²] = 0 | Qdyn [N/mm²] = 4,5 |
| Mb [Nm] = 9,00 | bstat [N/mm²] = 0 | bdyn [N/mm²] = 41,7 |
| Mt [Nm] = 24,25 | tstat [N/mm²] = 56,2 | tdyn [N/mm²] = 0 |
|  | vstat [N/mm²] = 97,4 | vdyn [N/mm²] = 42,0 |

Werkstoff C22 bS = 410 N/mm² bSch = 350 N/mm² bw = 250 N/mm²

erste Verkleinerung: 13 mm  bG = 0,98 Bild 1.15

bS‘ = bG * bS = 0,98 * 410 N/mm² = 402 N/mm² Gl. 1.6

bSch‘ = bG * bSch = 0,98 * 350 N/mm² = 343 N/mm² Gl. 1.7

bW‘ = bG * bW = 0,98 * 250 N/mm² = 245 N/mm² Gl. 1.8

zweite Verkleinerung: Aufgabenstellung: bO = 0,89; k = 1,6

GbW = * bW‘ = * 245 N/mm² = 136 N/mm² Gl. 1.10

GAK = * AK‘ = * 125 N/mm²(abgelesen) = 70 N/mm² Gl. 1.11

bS‘ ist von der zweiten Verkleinerung nicht betroffen, da rein statischer Anteil

| bw | 250 | bSch | 350 | bS | 410 |
| --- | --- | --- | --- | --- | --- |
| bW‘ | 245 | bSch‘ | 343 | bS‘ | 402 |
| GbW | 136 | AK‘ | 125 | GAK | 70 |

Die Welle ist dauerfest, da der Lastpunkt innerhalb des erlaubten Gebietes liegt.

Bei Überlast steigen statischer und dynamischer Anteil in gleicher Weise (Fall III).

| Welche Sicherheit muss ermittelt werden? | O statische Belastung steigt, dynamische Belastung bleibt konstant  O statische Belastung bleibt konstant, dynamische Belastung steigt  **** statische und dynamische Belastung steigen |
| --- | --- |

Gl. 1.17

aus Diagramm abgelesen: = 285 N/mm²

Gl. 1.16

Dauerfest übertragbare Leistung PDauer = 457 W * 2,04 = 932 W

| Wie groß ist die Sicherheit gegenüber Dauerbruch? | - | 2,04 |
| --- | --- | --- |
| Welche maximale Leistung kann unter Beibehaltung der Drehzahl dauerfest übertragen werden? | W | 932 |

A.1.11 Dauerfestigkeitsnachweis Getriebewelle Zahnrad - Reibrad

Gl. 0.63

Gl. 0.62

|  | statisch | dynamisch |
| --- | --- | --- |
| L [N] = 0 | ZDstat [N/mm²] = 0 | ZDdyn [N/mm²] = 0 |
| Q [N] = 2.899 | Qstat [N/mm²] = 0 | Qdyn [N/mm²] = 4,8 |
| Mb [Nm] = 111,6 | bstat [N/mm²] = 0 | bdyn [N/mm²] = 51,8 |
| Mt [Nm] = 119,4 | tstat [N/mm²] = 27,7 | tdyn [N/mm²] = 0 |
|  | vstat [N/mm²] = 48,0 | vdyn [N/mm²] = 52,4 |

Tabelle 1.2:

Werkstoff C22 bS = 410 N/mm² bSch = 350 N/mm² bw = 250 N/mm²

erste Verkleinerung: 28 mm  bG = 0,89 Bild 1.15

bS‘ = bG * bS = 0,89 * 410 N/mm² = 365 N/mm² Gl. 1.6

bSch‘ = bG * bSch = 0,89 * 350 N/mm² = 311 N/mm² Gl. 1.7

bW‘ = bG * bW = 0,89 * 250 N/mm² = 222 N/mm² Gl. 1.8

zweite Verkleinerung: Aufgabenstellung: bO = 0,85; k = 1,8

GbW = * bW‘ = * 222 N/mm² = 105 N/mm² Gl. 1.10

GAK = * AK‘ = * 118 N/mm²(abgelesen) = 56 N/mm² Gl. 1.11

bS‘ ist von der zweiten Verkleinerung nicht betroffen, da rein statischer Anteil

| bw | 250 | bSch | 350 | bS | 410 |
| --- | --- | --- | --- | --- | --- |
| bW‘ | 222 | bSch‘ | 311 | bS‘ | 365 |
| GbW | 105 | AK‘ | 118 | GAK | 56 |

Die Welle ist dauerfest, da der Lastpunkt innerhalb des erlaubten Gebietes liegt.

Bei Überlast steigen statischer und dynamischer Anteil in gleicher Weise (Fall III).

| Welche Sicherheit muss ermittelt werden? | O statische Belastung steigt, dynamische Belastung bleibt konstant  O statische Belastung bleibt konstant, dynamische Belastung steigt  **** statische und dynamische Belastung steigen |
| --- | --- |

aus Diagramm abgelesen: = 168 N/mm²

Gl. 1.17

Gl. 1.16

Dauerfest übertragbare Leistung PDauer = 10,0 kW * 1,67 = 16,7 kW

| Wie groß ist die Sicherheit gegenüber Dauerbruch? | - | 1,67 |
| --- | --- | --- |
| Welche maximale Leistung kann unter Beibehaltung der Drehzahl dauerfest übertragen werden? | kW | 16,7 |

A.1.12 Trommelwelle Haushaltswaschmaschine

Zentrifugalkraft der Masse der Wäsche:

FZt = mW * r * ² = 6,5 kg * 0,13 m * (62,8s-1)² = 3.335,9 N

Mbstat = FZt * 0,21 m = 3.335,9 N * 0,210 m = 700,5 Nm

(wirkt statisch, da sich Welle und Belastung phasengleich drehen)

Gewichtsbelastung von Trommel und Wäsche:

G = (mTr + mW) * g = (5,5 kg + 6,5 kg) * 9,81 m/s² = 117,7 N

Mbdyn = G * 0,21 m = 117,7 N * 0,21 m = 24,7 Nm

Den Unterschied zwischen statischer und dynamischer Belastung der Welle wird deutlich, wenn man die Waschmaschine (zumindest gedanklich) auf die Rückwand legt: Dann wirkt die Schwerkraft in axialer Richtung, kann also keine Biegung verursachen. Es bleibt nur die Zentrifugalkraft übrig, die zwar von außen als dynamische Unwucht wahrgenommen wird, für die Welle aber eine statische Biegebelastung darstellt. Wird nach dieser Betrachtung die Waschmaschine wieder auf die Füße gestellt, dann wirkt zusätzlich die für die Welle dynamische Biegung, die sowohl von der Trommel als auch von der darin befindlichen Wäsche verursacht wird.

Wax =

bstat = = 111,5 N/mm²

bdyn = = 3,9 N/mm²

Tabelle 1.2: C45

bS = 530 N/mm² bSch = 530 N/mm² bw = 350 N/mm²


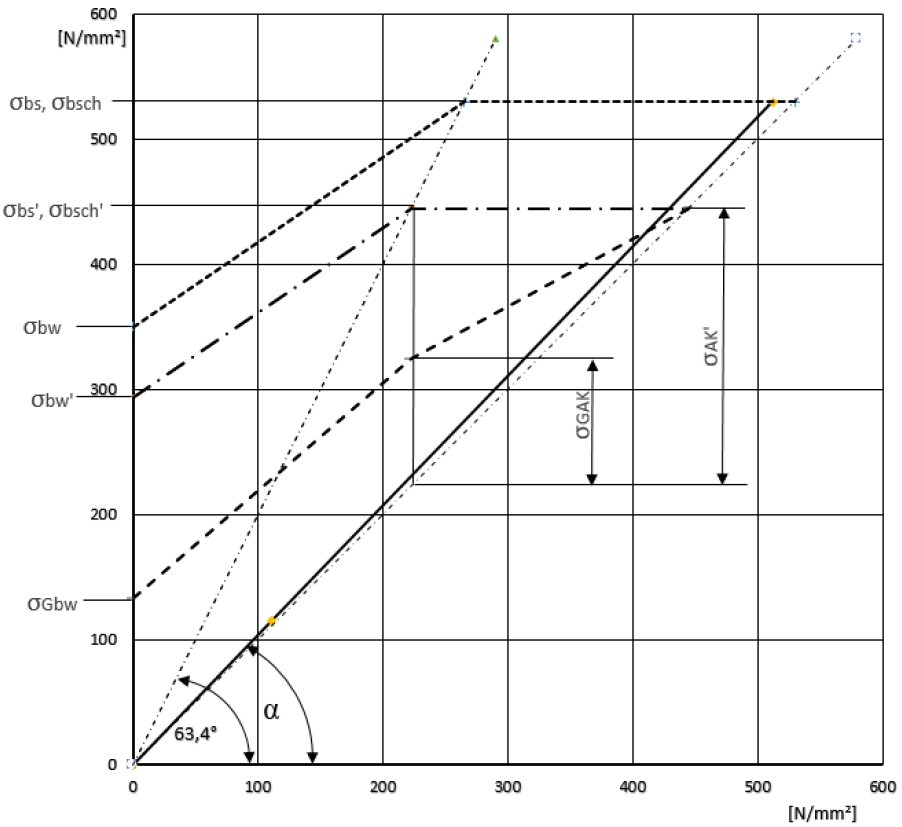


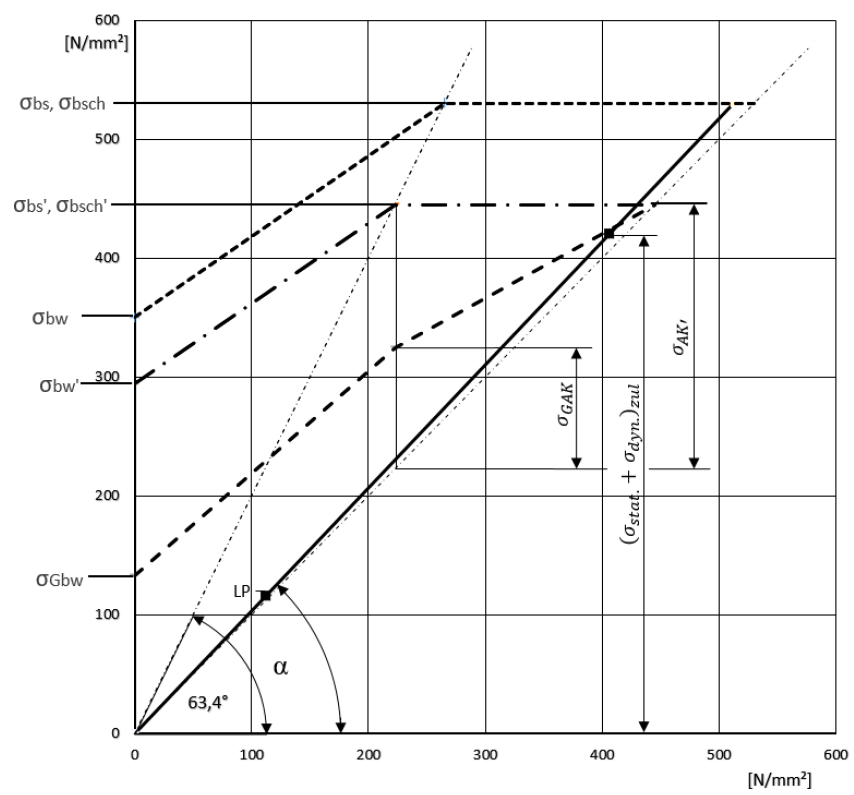


erste Verkleinerung: 40 mm  bG = 0,84 Bild 1.15

bS‘ = bG * bS = 0,84 * 530 N/mm² = 445 N/mm² Gl. 1.6

bSch‘ = bG * bSch = 0,84 * 530 N/mm² = 445 N/mm² Gl. 1.7

bW‘ = bG * bW = 0,84 * 350 N/mm² = 294 N/mm² Gl. 1.8

zweite Verkleinerung (Bild 1.18):

Rm = 700 – 850 N/mm², geschlichtet  bO = 0,86

Aufgabenstellung: k = 1,9

GbW = * bW‘ = * 294 N/mm² = 133 N/mm² Gl. 1.10

GAK = * AK‘ = * 222 N/mm²(abgelesen) = 100 N/mm² Gl. 1.11

bS‘ ist von der zweiten Verkleinerung nicht betroffen, da rein statischer Anteil

Einfüllen einer größeren Wäschemenge:

dynamische Belastung steigt, statische Belastung steigt (Fall III):

Gl. 1.17

= 420 N/mm² (aus Diagramm abgelesen)

Gl. 1.16

überhöhte Schleuderdrehzahl:

dynamische Belastung bleibt erhalten, statische Belastung steigt (Fall I):

statzul = 424 N/mm² (aus Diagramm abgelesen)

Gl. 1.14

| Berechnen Sie das Biegemomente in [Nm], welche die Welle ...  ... statisch belastet  ... und dynamisch belastet. | 700,5  24,7 |
| --- | --- |
| Berechnen Sie die an dieser Stelle vorliegende  ... statische Spannung in [N/mm²]  ... und dynamische Spannung in [N/mm²]! | 111,5  3,9 |
| Wie groß ist die Sicherheit gegen Dauerbruch, wenn eine Überlastung durch ... ... das Einfüllen einer größeren Wäschemenge herbeigeführt wird?  ... eine überhöhte Schleuderdrehzahl herbeigeführt wird? | 3,64  3,80 |
