# Supplementary material
Source: publisher site journal article supplement (https://www.degruyterbrill.com/publication/isbn/9783110692143/downloadAsset/9783110692143_Zusatzmaterial_Basiswissen.zip)
Supplement: Supplementary file 35 [file Basiswissen 3. Auflage, Lösungen Kap. 2.doc]

Basiswissen Maschinenelemente
Lösungen

3. Auflage

von
Prof. Dr.-Ing. Hubert Hinzen

Hochschule Trier, Fachbereich Technik

Oldenbourg Verlag München Wien Vers. 1.0

Lösungen zu Kapitel 2 „Federn“

Lösungen: Federn

Ersatzfedersteifigkeiten

A.2.1 Drei Schraubendruckfedern

links: Feder 2 und Feder 3 sind parallel geschaltet:

c23 = c2 + c3 = 12 N/mm + 4 N/mm = 16 N/mm Gl. 2.10

Kombination von Feder 2 und Feder ist mit Feder 1 hintereinander geschaltet:

Gl. 2.11

cges links = 4,364 N/mm

rechts: Feder 1 und Feder 2 sind parallel geschaltet:

c12 = c1 + c2 = 6 N/mm + 12 N/mm = 18 N/mm

Kombination von Feder 1 und Feder 2 ist mit Feder 3 hintereinander geschaltet:  cges rechts = 3,273 N/mm

A.2.2 Beidseitige Einspannung

Druckfeder 200 mm:

Beide Federn finden genau in dem Raum zwischen der Wand und dem verschiebbaren Block Platz, reagieren aber nur bei Druckverformung mit einer Kraft. Wird der Block aus dieser Lage ausgelenkt, so wirkt jeweils nur eine Feder. Die Gesamtsteifigkeit entspricht also der Steifigkeit einer einzelnen Feder.

Zug-/Druckfeder 200 mm:

Beide Federn finden wie zuvor genau in dem Raum zwischen der Wand und dem verschiebbaren Block Platz, reagieren aber sowohl bei Zug- als auch bei Druckverformung mit einer Kraft. Beide Federn werden mit dem gleichen Federweg verformt, sie sind also in Parallelschaltung angeordnet. Wird der Block aus der Mittellage ausgelenkt, so reagieren beide Federn. Die Gesamtsteifigkeit entspricht also doppelt so hoch wie eine Einzelsteifigkeit.

Druckfeder mit 220 mm Länge:

Beide Federn müssen um jeweils 20 mm zusammengedrückt werden, um in den Zwischenraum zwischen der Wand und dem verschiebbaren Block angeordnet zu werden. Wird der Block aus der Mittellage ausgelenkt, so werden beide Federn mit dem gleichen Federweg verformt. Die Gesamtsteifigkeit entspricht also der doppelten Einzelsteifigkeit.

Die Lösung zur letzten Konstruktionsvariante kann auch folgendermaßen abgeleitet werden:

Für die Montage muß jede der beiden Federn um 20 mm zusammengedrückt werden und reagiert darauf mit einer Kraft von F = c * f = 10 N/mm * 20 mm = 200 N. Diese beiden Kräfte heben sich jedoch gegenseitig auf, so daß der Block in mittiger Lage verbleibt. Wird der Block aus dieser mittigen Lage um beispielsweise 1 mm ausgelenkt, so wird die in Auslenkungsrichtung liegende Feder um insgesamt 21 mm zusammengedrückt und entwickelt dabei eine Kraft von 210 N, die auf der anderen Seite liegende Feder wird dann nur noch um 19 mm zusammengedrückt, worauf sie mit einer Kraft von 190 N reagiert. Betrachtet man nun das Kräftegleichgewicht am Block, so müssen 210 N – 190 N = 20 N aufgebracht werden, um den zuvor angenommenen Federweg von 1 mm herbei zu führen. Die Gesamtsteifigkeit beträgt also:

|  | unverformte Federlänge | Steifigkeit einer einzelnen Feder | Steifigkeit des Gesamtsystems |
| --- | --- | --- | --- |
| Druckfeder | 200 mm | 10 N/mm | 10 N/mm |
| Zug-/Druckfeder | 200 mm | 10 N/mm | 20 N/mm |
| Druckfeder | 220 mm | 10 N/mm | 20 N/mm |

A.2.3 Gesamtsteifigkeit Schraubenzugfeder

1. 2 Federn parallel
2. 3 Federn parallel
3. 2 Federn hintereinander
4. 4 Federn hintereinander
5. Hintereinanderschaltung von zwei Anordnungen nach b.)
6. Hintereinanderschaltung von drei Anordnungen nach a.)

Federbauformen

Drehstabfeder

A.2.4 Drehstabfeder, Variation von Steifigkeit und Belastbarkeit

Gl. 2.6 und Bild 0.25

Gl. 0.54 und Bild 0.25

Gl. 2.16

b. gleiche Belastbarkeit  Mtmax bleibt erhalten

erforderlicher Durchmesser bleibt erhalten

doppelte Steifigkeit  ct wird verdoppelt

Federlänge wird halbiert

speicherbare Arbeit wird halbiert

Federmasse wird halbiert

c. doppelte Belastbarkeit  Mtmax wird verdoppelt



gleiche Steifigkeit  ct bleibt gegenüber a. erhalten



=

|  | b. gleiche Belastbarkeit doppelte Steifigkeit | a. Ausgangsfall | c. doppelte Belastbarkeit gleiche Steifigkeit |
| --- | --- | --- | --- |
| Federdurchmesser  d [mm] | 18 | 18 | 22,68 |
| Federlänge L [mm] | 141 | 282 | 710,84 |
| Federsteifigkeit ct [Nm] | 5.116 | 2.558 | 2.558 |
| Belastbarkeit Mtmax [Nm] | 733 | 733 | 1.466 |
| speicherbare  Arbeit Wmax [Nm] | 52,5 | 105 | 420 |
| Federmasse  m [g] | 281 | 562 | 2.251 |

A.2.5 Variation der Momenteneinleitungsstelle

In jedem Fall handelt es sich um die Parallelschaltung von linker und rechter Feder.

für alle Fälle gilt:

Bild 0.25

Bild 0.25

Im Fall A sind beide Teilfedern gleich.

Einzelsteifigkeit: Gl. 2.6

Gesamtsteifigkeit: cges = 2 * ceinzeln = 4.810 Nm

Belastbarkeit Einzelfeder: Mteinzeln = zul * Wpol = 540 N/mm² * 1145 mm³ = 618 Nm

Belastbarkeit Gesamtsystem: Mtges = Mtlinks + Mtrechts = 2 * 618 Nm = 1.236 Nm

Die Verformungen am Teilsystem und am Gesamtsystem sind gleich:



Für die Fälle B und C sind die beiden Teilsysteme über den gemeinsamen Verdrehwinkel gekoppelt. Nur die jeweils steifere Feder darf bis an ihre Belastbarkeitsgrenze herangeführt werden, die Belastbarkeit des jeweils anderen Teilsystems kann nicht voll ausgenutzt werden.

Fall B:

cges = clinks + crechts =3.607 Nm + 1.804 Nm = 5.411 Nm

Nur die linke (steifere) Feder ist in ihrer Belastbarkeit voll ausnutzbar:

Mtlinks = 618 Nm (wie Fall A)

Dabei erfährt die linke Feder die folgende Verformung:

Beide Teilsysteme sind über den gemeinsamen Verdrehwinkel gekoppelt. Das rechte Teilsystem erfährt dabei die folgende Belastung:

Mtrechts = crechts * B = 1.804 Nm * 0,171 = 309 Nm

Mtges = Mtlinks + Mtrechts = 618 Nm + 309 Nm = 927 Nm

Fall C:

cges = clinks + crechts =  + 1.202 Nm =  das System verformt sich nicht

Nur die linke (steifere) Feder ist in ihrer Belastbarkeit voll ausnutzbar:

Mtlinks = 618 Nm (wie Fall A)

Dabei verformt sich die linke Feder nicht:

Das rechte Teilsystem kann keine Belastung aufnehmen:

Mtrechts = crechts * B = 1.202 Nm * 0 = 0

Mtges = Mtlinks + Mtrechts = 618 Nm + 0 Nm = 618 Nm

|  | Fall A | | | Fall B | | | Fall C | | |
| --- | --- | --- | --- | --- | --- | --- | --- | --- | --- |
|  | linke Feder | rechte Feder | Gesamt-system | linke Feder | rechte Feder | Gesamt-system | linke Feder | rechte Feder | Gesamt-system |
| maximales Lastmoment Mtmax [Nm] | 618 | 618 | 1.236 | 618 | 309 | 927 | 618 | 0 | 618 |
| Torsions-steifigkeit cT [Nm] | 2.405 | 2.405 | 4.810 | 3.607 | 1.804 | 5.411 |  | 1.202 |  |
| Verdrehwin-kel max [°] bei Maximallast | 14,73 | 14,73 | 14,73 | 9,82 | 9,82 | 9,82 | 0 | 0 | 0 |

A.2.6 Drei rohrförmige Federn

Sowohl bei Zug-/Druckbelastung als auch bei Torsionsbelastung liegt eine Hintereinanderschaltung von drei Federn (inneres, mittleres und äußeres Rohr) vor.

Zug-/Druckfeder

Die Druckbelastbarkeit hängt vom inneren Rohr ab, weil dort die kleinste Querschnittsfläche vorliegt:

Gl. 0.20

Steifigkeit Zug-/Druckfeder: Gl. 2.3

cges = 111,6 N/µm Gl. 2.11

Gl. 2.14

Torsion

Die Torsionsbelastbarkeit hängt vom inneren Rohr ab, weil dort das kleinste polare Widerstandsmoment vorliegt:

Gl. 0.54

Bild 0.25

Steifigkeit Torsionsfeder: Gl. 2.6

Bild 0.25

ctges = 5.107 Nm Gl. 2.11

Gl. 2.16

|  | Zug-/Druckfeder | Drehstabfeder |
| --- | --- | --- |
| Belastbarkeit | Fmax [N] = 146.838 | Mtmax [Nm] = 1.054,1 |
| Steifigkeit inneres Rohr | ci [N/µm] = 250,7 | cti [Nm] = 7.730 |
| Steifigkeit mittleres Rohr | cm [N/µm] = 356,2 | ctm [Nm] = 21.909 |
| Steifigkeit äußeres Rohr | ca [N/µm] = 461,8 | cta [Nm] = 48.040 |
| Gesamtsteifigkeit | cges [N/µm] = 111,6 | ctges [Nm] = 5.107 |
| max. speicherbare Arbeit | Wmax [Nm] = 96,6 | Wmax [Nm] = 108,8 |

A.2.7 Drehstabfeder und rohrförmige Feder

Drehstabfeder:

Gl. 0.54 mit Bild 0.25

Gl. 2.6 mit Bild 0.25

Gl. 2.16

Rohrfeder:

|  |  |  | Drehstabfeder | Rohrfeder | Gesamtsystem |
| --- | --- | --- | --- | --- | --- |
| zul. Schubspannung | zul | N/mm² | 720 | 580 |  |
| Belastbarkeit | Mtmax | Nm | 477,1 | 384,4 | 384,4 |
| Steifigkeit | ct | Nm | 1.739,5 | 4.070 | 1.219 |
| speicherbare Arbeit | Wmax | Nm | 65,43 | 18,15 | 60,63 |

Beide Federn sind hintereinander geschaltet. Die Gesamtbelastbarkeit richtet sich nach dem schwächsten Glied der Kette.

→

(geringer als die Arbeitspeicherfähigkeit der Drehstabfeder einzeln!)

Schraubenfeder als Zug-/Druckfeder

A.2.8 Schraubenzugfeder

Aus der Zeichnung lassen sich die für die Berechnung maßgebenden Daten ablesen:

d = 1 mm Dm = 18 mm i = 15

Gl. 2.24

Gl. 2.26

Gl. 2.31



Gl. 2.13

| Welche maximale Zugkraft kann in die Feder eingeleitet werden? | Fmax | N | 9,362 |
| --- | --- | --- | --- |
| Wie groß ist die Steifigkeit dieser Feder? | c | N/mm | 0,121 |
| Um welchen maximalen Federweg darf die Feder ausgelenkt werden? | fmax | mm | 77,1 |
| Wie groß ist die Arbeit, die maximal in dieser Feder gespeichert werden kann? | Wmax | Nm | 0,362 |

A.2.9 Schraubenzugfeder unter Volllast und Teillast

Aus der Zeichnung lassen sich die für die Berechnung maßgebenden Daten ablesen:

d = 3 mm Dm = 18 mm i = 10

Aufgabenteil a:

Gl. 2.24

Gl. 2.26

Gl. 2.31



Gl. 2.13

Aufgabenteil b:



Aufgabenteil c:



Aufgabenteil d:

Gl. 2.14 

Gl. 2.15 

|  |  | Aufgabenteil a | Aufgabenteil b | Aufgabenteil c | Aufgabenteil d |
| --- | --- | --- | --- | --- | --- |
|  |  | Volllast | Teillast mit | Teillast mit | Teillast mit |
| F | N | 266,6 | **200** | 147,6 | 243,0 |
| f | mm | 18,1 | 13,6 | **10** | 16,5 |
| W | Nm | 2,408 | 1,355 | 0,738 | **2,000** |

A.2.10 Federwaage

Gl. 2.27

Gl. 2.24

für zul = 300 N/mm²:

Annahme: K = 1,2  d = 2,535 mm

 K = 1,175  d = 2,517 mm

 K = 1,173  d = 2,516 mm

für zul = 400 N/mm²:

Annahme: K = 1,2  d = 2,304 mm

 K = 1,157  d = 2,276 mm

 K = 1,155  d = 2,274 mm

für zul = 500 N/mm²:

Annahme: K = 1,2  d = 2,138 mm

 K = 1,145  d = 2,105 mm

 K = 1,142  d = 2,104 mm

für zul = 600 N/mm²:

Annahme: K = 1,2  d = 2,012 mm

 K = 1,136  d = 1,976 mm

 K = 1,133  d = 1,974 mm

für zul = 700 N/mm²:

Annahme: K = 1,2  d = 1,912 mm

 K = 1,128  d = 1,873 mm

 K = 1,126  d = 1,871 mm

Die genaue Berechnung des Drahtdurchmessers kann zwar fertigungstechnisch kaum realisiert werden, erleichtert aber die Bewertung der Ergebnisse.

mit Gl. 2.33

|  | | a | b | c |
| --- | --- | --- | --- | --- |
| zul | K | d | iW | m |
| N/mm² | - | mm | - | g |
| 300 | 1,173 | 2,516 | 17,5 | 42,9 |
| 400 | 1,155 | 2,274 | 11,7 | 23,4 |
| 500 | 1,142 | 2,104 | 8,57 | 14,7 |
| 600 | 1,133 | 1,974 | 6,64 | 10,0 |
| 700 | 1,126 | 1,871 | 5,36 | 7,26 |

A.2.11 Schraubenzugfeder, Variation von Steifigkeit und Belastbarkeit

1. Gl. 2.31

Gl. 2.24

Gl. 2.26

Gl. 2.14

mF = Volumen * spezifisches Gewicht

mF = Querschnittfläche Federdraht * Federdrahtlänge * spez. Gewicht

mF = Querschnittfläche Federdraht *

Umfang einer Windung * Anzahl Windungen * spez. Gewicht

Fall b. und c.:

gleiche Belastbarkeit (Fmax bleibt erhalten) bedeutet, daß

- bei vorgegebenem Federdrahtdurchmesser der Windungsdurchmesser nicht verringert werden darf (b.)
- bei vorgegebenem Windungsdurchmesser der Federdrahtdurchmesser nicht verringert werden darf (c.)

 Fall b. und c. sind gleich!

cb,c = 2 * ca = 2 * 0,448 N/mm = 0,896 N/mm

die Steifigkeit wird verdoppelt durch Halbierung der Anzahl der federnden Windungen; dadurch wird die Federmasse halbiert

 durch Verdopplung der Steifigkeit

wird die speicherbare Arbeit halbiert

1. Verdoppelung der Belastbarkeit (Fmaxd = 2 * Fmaxa) bedeutet, daß bei beibehaltenem Drahtdurchmesser der Windungsdurchmesser aus Festigkeitsgründen neu dimensioniert werden muß:



K zunächst unbekannt, deshalb vorläufige Annahme K = 1,1

 K = 1,225

 K = 1,255

 K = 1,262

gerundet: Dm = 6,5 mm

 durch Verdopplung der Belastbarkeit

wird die speicherbare Arbeit vervierfacht

1. Verdoppelung der Belastbarkeit (Fmaxe = 2 * Fmaxa) bedeutet, daß bei beibehaltenem Windungsdurchmesser der Drahtdurchmesser aus Festigkeitsgründen neu dimensioniert werden muß:



K zunächst unbekannt, deshalb vorläufige Annahme K = 1,1

 K = 1,136

 K = 1,137

runden: d = 1,6 mm

 durch Verdopplung der Belastbarkeit

wird die speicherbare Arbeit vervierfacht

|  | gleiche Belastbarkeit  doppelte Steifigkeit | | Ausgangsfall | doppelte Belastbarkeit  gleiche Steifigkeit | |
| --- | --- | --- | --- | --- | --- |
|  | c. | b. | a. | d. | e. |
| Federdurchmesser  d [mm] | 1,2 | 1,2 | 1,2 | 1,2 | 1,6 |
| Windungsdurch-messer Dm [mm] | 15 | 15 | 15 | 6,5 | 15 |
| Anzahl federnde Windungen iw | 6 | 6 | 12 | 147,5 | 37,9 |
| Federsteifigkeit  c [N/mm] | 0,896 | 0,896 | 0,448 | 0,448 | 0,448 |
| Federbelastbarkeit  Fmax [N] | 24,54 | 24,54 | 24,54 | 49,08 | 49,08 |
| speicherbare Arbeit Wmax [Nm] | 0,336 | 0,336 | 0,672 | 2,688 | 2,688 |
| Federmasse  m [g] | 2,5 | 2,5 | 5,0 | 26,7 | 28,2 |

Die Federmasse steigt nicht exakt linear mit der Federarbeit, weil der Wahl’sche Faktor K bei engeren Windungen ungünstiger wird und deshalb eine größere Federmasse eingesetzt werden muß.

A.2.12 Vier schraubenförmig gewendelte Zug-/Druckfedern

Gl. 2.24

Gl. 2.26

Gl. 2.33



| Wie groß ist die Belastbarkeit dieser einzelnen Feder? | Fmaxeinzeln | N | 236,7 |
| --- | --- | --- | --- |
| Wie groß ist die Steifigkeit dieser einzelnen Feder? | ceinzeln | N/mm | 4,557 |
| Welcher Federweg stellt sich bei maximaler Belastung ein? | fmaxeinzeln | mm | 51,94 |

Kraftangriff bei A oder E:

das System kann sich nicht verformen, bezüglich der Federn könnte sogar eine unendlich große Kraft wirken

Kraftangriff bei C:

das linke Teilsystem besteht aus den hintereinander geschalteten Federn 1 und 2

das rechte Teilsystem besteht aus den hintereinander geschalteten Federn 3 und 4

das Gesamtsystem ist eine Parallelschaltung von linkem und rechtem Teilsystem

alle Federn können sich um die maximal mögliche Auslenkung verformen und entwickeln dabei die Fmaxeinzeln; am Kraftangriffspunkt wirkt diese Kraft vom linken und rechten Teilsystem

FgesmaxC = 2 * Fmaxeinzeln = 2 * 236,7 N = 473,4 N

Kraftangriff bei B:

das linke Teilsystem besteht nur aus Feder 1

das rechte Teilsystem besteht aus den hintereinander geschalteten Federn 2, 3 und 4

das Gesamtsystem ist eine Parallelschaltung von linkem und rechtem Teilsystem

das linke Teilsystem kann um die maximal mögliche Auslenkung verformt werden und entwickelt dabei die Fmaxeinzeln; diese Verformung verteilt sich im rechten Teilsystem auf drei Federn, so daß dort nur ein Drittel der maximal möglichen Kraft wirken kann

das gleiche Ergebnis ergibt sich, wenn die Gesamtsteifigkeit an der Krafteinleitungsstelle B formuliert:

 FgesmaxB = cgesB * fmaxB = 6,076 N/mm * 51,94 mm = 315,6 N

Kraftangriff bei D:

die Verhältnisse von B kehren sich genau um

|  |  | A | B | C | D | E |
| --- | --- | --- | --- | --- | --- | --- |
| cges | N/mm |  | 6,076 | 4,557 | 6,076 |  |
| f1max | mm | 0 | 51,94 | 51,94 | 17,31 | 0 |
| f2max | mm | 0 | 17,31 | 51,94 | 17,31 | 0 |
| f3max | mm | 0 | 17,31 | 51,94 | 17,31 | 0 |
| f4max | mm | 0 | 17,31 | 51,94 | 51,94 | 0 |
| Fgesmax | N |  | 315,5 | 473,4 | 315,6 |  |

A.2.13 Zugstabfeder und schraubenförmig gewendelte Zugfeder

Zugstabfeder:

Gl. 0.20 →

Gl. 2.19

Schraubenförmig gewendelte Feder:

Gl. 2.24

Gl. 2.23

mit Dm = 10 * d:

Gl. 2.33

| Zugstabfeder | | schraubenförmig gewendelte Feder | |
| --- | --- | --- | --- |
| Wie groß muss der Stabdurchmesser d [mm] mindestens sein? | 4,26 | Wie groß muss der Drahtdurchmesser d [mm] mindestens sein, wenn ein Windungsverhältnis Dm/d = 10 ausgeführt wird? | 24,52 |
| Welche Länge L [mm] muss die Feder dann aufweisen? | 150.000 | Wie viele federnde Windungen muss die Feder dann aufweisen? | 12,57 |
| Wie groß ist die Federmasse [kg]? | 16,76 | Wie groß ist die Federmasse [kg]? | 35,86 |

Trotz gleicher Belastbarkeit und Steifigkeit ist die Zugstabfeder zwar viel leichter als die schraubenförmig gewendelte Feder, aber wegen ihrer Länge von 150 m ist sie kaum einsetzbar.

A.2.14 Leiterprüfung

Widerstandsmoment im geschwächten Bereich:

Bild 0.19

Last verteilt sich auf zwei Leiterholme

Flächenmoment im ungeschwächten Querschnitt

Bild 0.19

Gl. 2.7

| Wie groß ist das Widerstandsmoment eines einzelnen Leiterholms im Bereich der Querbohrung, die die Leitersprosse aufnimmt? | mm3 | 7.681 |
| --- | --- | --- |
| Wie groß ist das maximale Biegemoment, welches in der Leiter durch die Prüflast hervorgerufen wird? | Nm | 604,3 |
| Wie groß ist die maximale Biegespannung, die sich bei der Prüfbelastung in den Leiterholmen einstellt, wenn angenommen wird, dass die Leiter im Bereich der Querbohrungen in ihrer Festigkeit gefährdet ist? |  | 39,4 |
| Wie groß ist das Flächenmoment eines einzelnen Leiterholms im ungeschwächten Querschnitt? | mm4 | 224.590 |
| Wie groß ist die Durchbiegung der Leiter an der Stelle der Lasteinleitung, wenn vereinfachend angenommen werden kann, das die Leiterholme im Wesentlichen aus ungeschwächtem Querschnitt bestehen? | mm | 96,7 |

A.2.15 Zimmermännssäge

Gl. 0.31 und und Gl. 0.36 bzw. Bild 0.19

→

Der Faktor 2 muss eingeführt werden, weil sich sowohl das Sägeblatt als auch die Gewindespindel mit ihre jeweiligen Zugkraft am Druckstab abstützen.

| Mit welchem maximalen Biegemoment können die senkrechten Schenkel belastet werden, wenn deren Werkstofffestigkeit vollständig ausgenutzt werden soll? | Nm | 235,2 |
| --- | --- | --- |
| Welche maximale Zugkraft kann daraufhin in das Sägeblatt eingeleitet werden? | N | 1.176 |
| Welche Druckkraft erfährt dabei der mittlere Druckstab? | N | 2.353 |

Sägeblatt:

Gl. 2.3

Gewindespindel:

→

Druckstab:

→

„halber“ Schenkel:

Gl. 2.7

|  |  | Federweg einzeln am Objekt | dadurch bedingter Verstellweg an der Flügelmutter |
| --- | --- | --- | --- |
| Sägeblatt | µm | 426 | 426 |
| Gewindespindel | µm | 88 | 88 |
| Druckstab | µm | 153 | 306 |
| „halber“ seitlicher Schenkel als Modellfall des „einseitig eingespannten Biegebalkens“ | µm | 4.978 | 19.911 |
| Summe | µm |  | 20.731 |

Die Verformungen von Sägeblatt und Gewindestange gehen unverändert in die Gesamtverformung ein. Die Zusammendrückung des Druckstabes zählt doppelt, da sie sich mit doppeltem Hebelarm auf die Gewindestange überträgt. Die Verformung des Biegebalkens tritt vierfach in Hintereinanderschaltung auf. Die Verformung der Biegebalken ist dominant.

| Bei jeder Umdrehung der Flügelmutter wird ein Axialweg von 1,25 mm Axialweg zurück gelegt. Wie viele Umdrehungen müssen dann an der Flügelmutter von der ersten Festkörperberührung bis zum endgültigen Vorspannungszustand ausgeführt werden? | - | 16,58 |
| --- | --- | --- |
