# Supplementary material
Source: publisher site journal article supplement (https://www.degruyterbrill.com/publication/isbn/9783110692143/downloadAsset/9783110692143_Zusatzmaterial_Basiswissen.zip)
Supplement: Supplementary file 37 [file Basiswissen 3. Auflage, Lösungen Kap. 4,.doc]

Basiswissen Maschinenelemente
Lösungen

3. Auflage

von
Prof. Dr.-Ing. Hubert Hinzen

Hochschule Trier, Fachbereich Technik

Oldenbourg Verlag München Wien Vers. 1.0

Lösungen zu Kapitel 4 „Schrauben“

Lösungen: Schrauben

Befestigungsschrauben

Vorspannen von Schraubverbindungen

A.4.1 Winkelgesteuertes Anziehen

a. Gl. 4.24 bzw. Gl. 2.3

für M8:

für M10:

für M12:

b. Gl. 4.9 und 4.12

Gl. 4.11

für M8:

für M10:

für M12:

MKR = FV * µK * rK mit Gl. 4.14

für M8: MKR = 18 kN * 0,12 * 5,5 mm = 11,88 Nm

für M10: MKR = 18 kN * 0,12 * 7,00 mm = 15,12 Nm

für M12: MKR = 18 kN * 0,12 * 8,00 mm = 17,28 Nm

Mgesanz = MGewanz + MKR Mgeslös = MGewlös + MKR

c.  Gl. 4.29

 Gl. 4.30

d. Gl. 4.28

für M8:

für M10:

für M12:

e.

|  |  | M8 | M10 | M12 |
| --- | --- | --- | --- | --- |
| cS | N/µm | 96,1 | 152,2 | 221,3 |
| MGewanz | Nm | 12,64 | 15,67 | 18,70 |
| MGewlös | Nm | 5,34 | 6,91 | 8,47 |
| MKR | Nm | 11,88 | 15,12 | 17,28 |
| Mgesanz | Nm | 24,52 | 30,79 | 35,98 |
| Mgeslös | Nm | 17,22 | 22,03 | 25,75 |
| fSV | µm | 187 | 118 | 81 |
| fZV | µm | 28 | 28 | 28 |
|  | ° | 62 | 35 | 22 |
| Z | N/mm² | 492 | 310 | 213 |
| t | N/mm² | 202 | 126 | 86 |
| V | N/mm² | 604 | 379 | 260 |

Das winkelgesteuerte Anziehen der Schraube setzt voraus, daß der Übergang zwischen dem momentenlosen Eindrehen der Schraube und dem Anziehen mit steigendem Moment eindeutig festgestellt werden kann, so daß der Nullpunkt des Winkels  genau markiert werden kann. Dies wiederum erfordert eine optimale Oberfläche an den im Verspannungsfluss liegenden Flächen, was die Anwendungsmöglichkeit dieses Anzugsverfahrens stark einschränkt.

A.4.2 Verschraubung stromführender Leiterbahnen

Aufgabenteil a

Gl. 4.17

Gl. 4.11

Gl. 4.14

Schema zu Beginn von Kap. 4.3

Aufgabenteil b

Gl. 4.36

fV wird durch die Wärmeausdehnung der kupfernen Zwischenlage hervorgerufen:

fV = L * Cu *  = 20 mm * 16 * 10-6/°C *120°C = 38,4 µm Gl. 4.37

Der verformbare Abschnitt der Schraube besteht aus einem Schaftanteil und einem Gewindeanteil. Die Steifigkeit der Schraube müßte also als eine Hintereinanderschaltung beider Anteile betrachtet werden. Da aber die Aufteilung der Klemmlänge in diese beiden Anteile nicht bekannt ist, wird sicherheitshalber mit der höheren Steifigkeit, also mit dem Nennquerschnitt gerechnet:

Gl. 4.24

AZ = 1,2 * A 

dadurch hervorgerufene zusätzliche Zugspannung:

Aufgabenteil c

fV = L * (Cu - St) *  = 20 mm * (16 – 11) * 10-6/°C *120°C = 12 µm

dadurch hervorgerufene zusätzliche Zugspannung:

|  | Aufgabenteil a | Aufgabenteil b | Aufgabenteil c |
| --- | --- | --- | --- |
| Zwischenlage | 20°C | 140°C | 140°C |
| Schraube | 20°C | 20°C | 140°C |
| Z [N/mm²] = | 594 | 594 + 211 = 805 | 594 + 66 = 660 |
| t [N/mm²] = | 241 | 241 | 241 |
| V [N/mm²] = | 726 | 906 | 781 |

Querkraftbeanspruchte Schraubverbindungen

A.4.3 Wellenflansch mit einem Teilkreis

P = M *  mit Gl. 0.63

Gl. 0.62

Dieses Moment stützt sich auf 6 Schrauben mit dem Hebelarm 128/2 mm ab:



a. Gl. 4.38 bzw. Gl. 3.3

Gl. 4.38 bzw. Gl. 3.1

|  | Lochleibungsdruck | pL | N/mm² | 5,6 |
| --- | --- | --- | --- | --- |
|  | Querkraftschub | Q | N/mm² | 7,5 |

b. Gl. 4.39

Gl. 4.12

Gl. 4.11

MKA = 0,8 * MGew = 0,8 * 14,4 Nm = 11,5 Nm

Manz = MGew + MKA = 14,4 Nm + 11,5 Nm = 25,9 Nm Gl. 4.15

| Mit welcher Vorspannkraft muss jede einzelne der Schrauben angezogen werden? | FV | N | 16.576 |
| --- | --- | --- | --- |
| Wie groß ist das Gewindemoment? | MGew | Nm | 14,4 |
| Wie groß ist das Kopfreibungsmoment? | MKR | Nm | 11,5 |
| Wie groß ist das Schraubenanzugsmoment Manz? | Manz | Nm | 25,9 |
| Welche Zugspannung Z liegt vor? | Z | N/mm² | 286 |
| Wie groß ist der Torsionsschub? | t | N/mm² | 116 |
| Welche Vergleichsspannung ergibt sich? | V | N/mm² | 348 |

A.4.4 Wellenflansch mit drei Teilkreisen

a. äußerer Lochkreis:

mittlerer Lochkreis:

Die Umfangskraft am mittleren Lochkreis Fum wird **nicht** durch den Reibschluß begrenzt, sondern es kann nur soviel Kraft übertragen werden wie es die gemeinsame Verdrehung mit dem äußeren Lochkreis zulässt

innerer Lochkreis:

MtWelle = Mta + Mtm + Mti = 461 Nm + 259 Nm + 58 Nm = 778 Nm Gl. 4.15

1. Am äußeren Lochkreis wird die übertragbare Umfangskraft durch den Reibschluß begrenzt, deshalb muss dort die Vorspannung erhalten bleiben:

FVmina = 12.000 N

Für die weiter innen liegenden Lochkreise ist die Vorspannkraft unnötig hoch. Sie kann entsprechend dem Abstand zum Schwerpunkt der Schraubverbindung reduziert werden:

mittlerer Lochkreis:

innerer Lochkreis:

c. Gl. 4.11

Gl. 4.12

äußerer Lochkreis: MGew = 6,42 Nm

mittlerer Lochkreis: MGew = 4,81 Nm

innerer Lochkreis: MGew = 3,21 Nm

d.

äußerer Lochkreis:

mittlerer Lochkreis:

innerer Lochkreis:

e. Manz = 2 * MGew

|  |  |  | innerer  Lochkreis | mittlerer  Lochkreis | äußerer  Lochkreis | gesamt |
| --- | --- | --- | --- | --- | --- | --- |
| a | MtWelle | Nm | 58 | 259 | 461 | 778 |
| b | FVmin | N | 6.000 | 9.000 | 12.000 |  |
| c | MGew | Nm | 3,21 | 4,81 | 6,42 |  |
|  | Z | N/mm² | 299 | 448 | 597 |  |
|  | t | N/mm² | 126 | 189 | 252 |  |
| d | V | N/mm² | 370 | 555 | 740 |  |
|  | Schrau-bengüte |  | 6.8 | 8.8 | 10.9 |  |
| e | Manz | Nm | 6,42 | 9,62 | 12,84 |  |

Längskraftbeanspruchte Schraubverbindungen

A.4.5 Betriebskraft im Verspannungsschaubild

rechnerische Lösung:

Gl. 4.43

FSmax = FV + FBS = 120 kN + 20 kN = 140 kN Gl. 4.44

FRK = FSmax – FBL = 140 kN – 80 kN = 60 kN



|  | FSmax [kN] | FRK [kN] | fB [µm] |
| --- | --- | --- | --- |
| zeichnerisch | 140 | 60 | 10 |
| rechnerisch | 140 | 60 | 10 |

A.4.6 Druckbehälter

Gl. 4.24

z: Anzahl der Schrauben

p = 24 bar = 24 * 105 N/m² und

FRK = 0,25 * FBL =8.490 N Vorgabe der Aufgabenstellung

FSmax = FBL + FRK = 42.450 N vgl. Bild 4.17

Gl. 4.45

MGew = Gl. 4.12

Gl. 4.11

MGew =

Gl. 4.14

Manz = MGew + MKR = 28,47 Nm + 27,45 Nm = 55,92 Nm Gl. 4.15

nach Schema S. 148

V =

Schraubengüte 10.9  zul = 0,9 * 1.000 N/mm² = 900 N/mm²

Festigkeit ausreichend

| Berechnen Sie die Steifigkeit der Schraube! | cS | N/µm | 687 |
| --- | --- | --- | --- |
| Wie groß ist die Betriebskraft für jede einzelne Schraube? | FBL | N | 33.960 |
| Welche Restklemmkraft übt die einzelne Schraube aus? | FRK | N | 8.490 |
| Welche maximale Kraft erfährt die einzelne Schraube? | FSmax | N | 42.450 |
| Mit welcher Kraft muss jede Schraube vorgespannt werden? | FV | N | 32.960 |
| Welches Moment ist im Gewinde aufzubringen? | MGew | Nm | 28,47 |
| Welches Kopfreibungsmoment wird wirksam? | MKR | Nm | 27,45 |
| Mit welchem Moment muss die Schraube angezogen werden? | Manz | Nm | 55,92 |
| Wie groß sind die Zugspannung in der Schraube? | Z | N/mm² | 732 |
| Welche Torsionsspannung entsteht im Gewinde? | t | N/mm² | 229 |
| Welche Vergleichsspannung belastet die Schraube? | V | N/mm² | 833 |
| Ist die Festigkeit der Schraube ausreichend? |  |  | **** ja  O nein |

A.4.7 Rohrleitungsflansch

Gl. 4.15 (laut Aufgabenstellung)

Gl. 4.12

Gl. 4.11

FRK = FBL (laut Aufgabenstellung)

FSmax = FRK + FBL = 2 * N = 8.678 N

V =

Schraubengüte 5.6 mit zul = 300 N/mm²

| Welches Moment wird im Gewinde wirksam? | | MGew | Nm | 6 |
| --- | --- | --- | --- | --- |
| Welches Kopfreibungsmoment tritt auf? | | MKR | Nm | 6 |
| Mit welcher Kraft wird jede Schraube vorgespannt? | | FV | N |  |
| Wie groß ist die Betriebskraft für jede einzelne Schraube? | | FBL | N |  |
| Welche Restklemmkraft übt die einzelne Schraube aus? | | FRK | N |  |
| Welche maximale Kraft erfährt die einzelne Schraube? | | FSmax | N | 8.667 |
| Welcher maximale Druck darf in der Rohrleitung wirksam werden? | | pmax | bar |  |
| Wie groß ist die Zugspannung in der Schraube? | | Z | N/mm² | 237,1 |
| Welche Torsionsspannung entsteht im Gewinde? | | t | N/mm² | 96.0 |
| Welche Vergleichsspannung belastet die Schraube? | | V | N/mm² | 289.6 |
| Welche Schraubengüte ist erforderlich? | 3.6 – 4.6 – **5.6** – 5.8 – 6.8 – 8.8 – 10.9 – 12.9 | | | |

A.4.8 Druckbehälter statisch und dynamisch belastet

z: Anzahl der Schrauben

p = 18 bar = 18 * 105 N/m² und

FRK = 2 * FBL = 28.510 N Forderung der Aufgabenstellung

FSmax = FBL + FRK = 42.765 N s. auch Bild 4.30

Konstruktionsvariante A wird mit einem statischen Druck von 18 bar belastet

Gl. 4.24

Je nach Annahme, wie sich die federnde Schraubenlänge auf Schaft- und Gewindeanteil aufteilt, ergeben sich andere Zahlenwerte. Die Annahme, daß die gesamte Klemmlänge nur aus Schaft besteht, ergibt die höchste Steifigkeit und man befindet sich auf der „sicheren Seite“.

ΔFBZ nach Gl. 4.46

FSmin = FSmax = 42.765 N Betriebskraft statisch

Konstruktionsvariante A wird mit einem Druck belastet, der zwischen 0 und 18 bar pulsiert

wie zuvor

wie zuvor

FSmin = FSmax = 42.765 N

Schema nach Bild 4.19

Konstruktionsvariante B wird mit einem Druck belastet, der zwischen 0 und 18 bar pulsiert

FSmin = FSmax = 42.765 N

Konstruktionsvariante C wird mit einem Druck belastet, der zwischen 0 und 18 bar pulsiert

Gl. 4.50  cSH = 438 N/µm

FSmin = FSmax = 42.765 N

|  |  | Variante A statischer  Druck 18 bar | Variante A dynamischer Druck zwischen 0 und 18 bar  pulsierend | Variante B dynamischer Druck zwischen 0 und 18 bar  pulsierend | Variante C dynamischer Druck zwischen 0 und 18 bar pulsierend |
| --- | --- | --- | --- | --- | --- |
| cZ | N/µm | 1200 | 1200 | 1200 | 1200 |
| cS bzw. cSH | N/µm | 990 | 990 | 687 | 438 |
| FBL | N | 14.255 | 14.255 | 14.255 | 14.255 |
| FRK | N | 28.510 | 28.510 | 28.510 | 28.510 |
| FV | N | 36.321 | 36.321 | 37.575 | 38.935 |
| FSmax | N | 42.765 | 42.765 | 42.765 | 42.765 |
| FSmin | N | 42.765 | 36.321 | 37.575 | 38.953 |
| FSstat | N | 42.765 | 39.543 | 40.170 | 40.859 |
| FSdyn | N | 0 | 3.222 | 2.595 | 1.906 |
| Zstat | N/mm² | 507 | 469 | 693 | 485 |
| Zdyn | N/mm² | 0 | 38 | 45 | 23 |

Sowohl bei Konstruktionsvariante B als auch bei C wird die dynamische Schraubenkraft FSdyn gegenüber A kleiner, weil die Schraubensteifigkeit herabgesetzt worden ist.

- Bei B wird die Steifigkeit unvorteilhafterweise durch Verringerung der Querschnittsfläche reduziert, so dass die dynamische Zugspannung in der Schraube dennoch ansteigt.
- Konstruktionsvariante C hingegen behält die Querschnittsfläche bei und reduziert die Steifigkeit durch eine größere Schraubenlänge und durch Hintereinanderschaltung mit einer Hülse, was zu einem deutlichen Absinken der dynamischen Zugspannung führt.

A.4.9 Amboss

a. Durch den Schlag wird eine nach unten gerichtete, also negative Betriebskraft eingeleitet. Die maximale Schraubenkraft FSmax entspricht dann der Vorspannkraft FV und die minimale Betriebskraft FSmin ist die Restklemmkraft, die dann nicht an der Trennfuge zwischen Amboss und Unterlage (also bei cZ), sondern am Schraubenkopf (also bei cS) auftritt.

Bild 4.18

FSmax = FV = 140 kN FSmin = FRK = 105 kN

b.

c.

MKR = FV * µK * rK = 140kN * 0,125 * 19,5 mm = 341Nm

Mges = MGew + MKR = 360 Nm + 341 Nm = 701 Nm

d.

| a | Skizzieren Sie das Verspannungsschaubild. Kennzeichnen und berechnen Sie  die Betriebskraft FBL,  die Restklemmkraft FRK,  die Vorspannkraft FV,  die maximale Schraubenkraft FSmax  und die minimale Schraubenkraft FSmin! | kN  kN  kN  kN  kN | 105  105  140  140  105 |
| --- | --- | --- | --- |
| b. | Wie groß ist die in der Schraube wirkende  statische Kraft FSstat  und die dynamische Kraft FSdyn? | kN  kN | 122,5  17,5 |
| c. | Berechnen Sie das Gewindemoment MGew,  das Kopfreibungsmoment MKR  und das Anzugsmoment Manz! | Nm  Nm  Nm | 360  314  701 |
| d. | Wie groß ist die statische Vergleichsspannung σVstat  und die dynamische Vergleichsspannung σVdyn der Schraube? | N/mm²  N/mm² | 275  31 |

A.4.10 Pufferbefestigungsschraube

FSmin = FRK = 140 kN

FSmax = FV = 166,9 kN

Manz =

Manz = 429,4 Nm + 494,4 Nm = 923,8 Nm

FSstat = = 153,45 kN FSdyn = = 13,45 kN

| die Betriebskraft | FBL | N | 87.500 |
| --- | --- | --- | --- |
| die minimale Schraubenkraft | FSmin | N | 140.000 |
| die Schraubensteifigkeit | cS | N/µm | 906,2 |
| die Ersatzfläche für die Zwischenlagensteifigkeit | Aers | mm² | 1.261 |
| die Zwischenlagensteifigkeit | cZ | N/µm | 2.037 |
| die Vorspannkraft | FV | N | 166.900 |
| die maximale Schraubenkraft | FSmax | N | 166.900 |
| das Gewindemoment beim Anziehen | MGewanz | Nm | 429,4 |
| das Kopfreibungsmoment | MKR | Nm | 494,4 |
| das Schraubenanzugsmoment | Manz | Nm | 923,8 |
| die statische Schraubenkraft | FSstat | N | 153.450 |
| die dynamische Schraubenkraft | FSdyn | N | 13.450 |
| die statische Vergleichsspannung in der Schraube | σVstat | N/mm² | 337,7 |
| die dynamische Vergleichsspannung in der Schraube | σVdyn | N/mm² | 24,0 |

A.4.11 Verschraubung mit Titanhülse

Gl. 4.24

cKopf = cMutter =

cHülse =

cPlatte St =

cPlatte Al =

| cSchaft | cGewinde | cKopf | cMutter | cHülse | cPlatteSt | cPlatteAl |
| --- | --- | --- | --- | --- | --- | --- |
| 4.222 | 634 | 5.278 | 5.278 | 783 | 5.059 | 2.526 |

Gl. 4.50

 cS = 265 N/µm

 cZ = 3.370 N/µm

 = = = 0,073 Gl. 4.45

| cS | cZ |  |
| --- | --- | --- |
| 265 | 3.370 | 0,073 |
