# Supplementary material
Source: publisher site journal article supplement (https://www.degruyterbrill.com/publication/isbn/9783110692143/downloadAsset/9783110692143_Zusatzmaterial_Basiswissen.zip)
Supplement: Supplementary file 39 [file Basiswissen 3. Auflage, Lösungen Kap. 6,.doc]

Basiswissen Maschinenelemente
Lösungen

3. Auflage

von
Prof. Dr.-Ing. Hubert Hinzen

Hochschule Trier, Fachbereich Technik

Oldenbourg Verlag München Wien Vers. 1.0

Lösungen zu Kapitel 6 „Welle-Nabe-Verbindungen“

Lösungen:
Welle-Nabe-Verbindungen

Formschluß

A.6.1 Vergleich formschlüssiger Welle-Nabe-Verbindungen

Paßfederverbindung:

wellenseitig: Umax = pzul * A *  = pzul * t1 * L *  = 60 N/mm² * 7 mm * 40 mm = 16,80 kN

nabenseitig: Umax = pzul * A *  = pzul * t2 * L *  = 60 N/mm² * 4,4 mm * 40 mm = 10,56 kN

Keilwellenverbindung leichte Reihe:

Keilwellenverbindung mittlere Reihe:

Keilwellenverbindung schwere Reihe:

|  | Passfeder  DIN 6885 | Keilwelle  DIN ISO 14  leichte Reihe | Keilwelle  DIN ISO 14  mittlere Reihe | Keilwelle  DIN 5464  schwere Reihe |
| --- | --- | --- | --- | --- |
| Mtmax [Nm] | 316,8 | 1.188 | 1.613 | 2.295 |

Kraftschluß: Klemmverbindungen

Axialklemmverbindungen

A.6.2 Miniflex

Gl. 0.63

P = Mt * ω Gl. 0.62 →

Gl. 6.14

Mtmax = µ * Fax * rm Gl. 6.13

Gl. 6.10

Gl. 4.11

Gl. 4.12

entweder (Annahme „schmaler Kreisring“)

MKR = FV * µK * rKR = Gl. 4.14

oder (Annahme „breiter Kreisring“)

MKR = FV * µK * rm =

Mges = MGew + MKR = 69,49 Nmm + 69,58 Nm = 139,07 Nm Gl. 4.15

| Welches Torsionsmoment ist zu übertragen? | Mt | Nmm | 69,45 |
| --- | --- | --- | --- |
| Welcher Hebelarm ist für die Momentenübertragung zwischen Werkzeug und Flansch maßgebend? | rm | mm | 2,23 |
| Welche Axialkraft muss für die Momentenübertragung zwischen Werkzeug und Flansch aufgebracht werden? | Fax | N | 260,0 |
| Welche Flächenpressung entsteht zwischen Werkzeug und Flansch? | p | N/mm² | 16,55 |
| Welches Gewindemoment muss durch an der Schraube aufgebracht werden, um den Reibschluss des axialen Klemmverbandes sicher zu stellen? | MGew | Nmm | 69,49 |
| Mit welchem Gesamtmoment muss angezogen werden? | Mges | Nmm | 139,07 |

A.6.3 Kreissägenblatt

Gl. 0.63

P = Mt * ω Gl. 0.62 →

Gl. 6.14

Mtmax = µ * Fax * rm Gl. 6.13

Gl. 6.10

Gl. 4.11

Gl. 4.12

MKR = FV * µK * rK = Gl. 4.14

Mges = MGew + MKR = 27,96 Nm + 26,98 Nm = 54,94 Nm

| Welches Torsionsmoment ist zu übertragen? | | | Mt | Nm | 45,27 |  |
| --- | --- | --- | --- | --- | --- | --- |
| Welcher Hebelarm ist für die Momentenübertragung maßgebend? | | | rm | mm | 17,62 |  |
| Welche Axialkraft muss durch die Schraube aufgebracht werden? | | | Fax | N | 32.117 |  |
| Welche Flächenpressung entsteht zwischen Flansch und Sägeblatt? | | | p | N/mm² | 58,4 |  |
| Welches Gewindemoment ist erforderlich? | | | MGew | Nm | 27,96 |  |
| Mit welchem Gesamtmoment muss angezogen werden? | | | Mges | Nm | 54,94 |  |
| Wie hoch ist die Zugspannung in der Schraube? | | | σZ | N/mm² | 554 |  |
| Wie hoch ist der Torsionsschub in der Schraube? | | | τt | N/mm² | 224 |  |
| Welche Vergleichsspannung liegt in der Schraube vor? | | | σV | N/mm² | 676 |  |
| Das Anzugsmoment der Schraube kann in der Welle abgestützt werden. Ist es auch möglich, stattdessen nur das Sägeblatt zu blockieren? Begründen Sie Ihre Aussage durch Ankreuzen. | **** ja  O nein | weil O Mgesanz < MWNV  weil **** MGew < MWNV  weil O MKopfreibung < MWNV  weil O Mgesanz ≥ MWNV  weil O MGew ≥ MWNV  weil O MKopfreibung ≥ MWNV | | | | |

Radialklemmverbindungen

A.6.4 Schalenkupplung

Die dargestellte Schalenkupplung setzt sich aus zwei hintereinandergeschalteten radialen Klemmverbindungen zusammen: In der linken Kupplungshälfte wird das Moment von der linken Welle auf die Kupplung übertragen und in der rechten Kupplungshälfte wird das Moment von der Kupplung auf die rechte Welle übertragen.

Bild 6.12 links

Bild 6.12 unten

| Welches maximale Moment kann übertragen werden, wenn die Verbindung nach der zulässigen Vorspannkraft der Schrauben dimensioniert wird? | Mmax | Nm | 668 |
| --- | --- | --- | --- |
| Welche Flächenpressung tritt dann zwischen Welle und Nabe auf? | p |  | 23,1 |

Es kann eine Flächenpressung zwischen Welle und Nabe von p = 60 N/mm² zugelassen werden. Kreuzen Sie in der folgenden Rubrik an, welche Maßnahme zur Erhöhung des übertragbaren Momentes sinnvoll ist.

|  | ja | nein |
| --- | --- | --- |
| Verwendung von Schrauben höherer Festigkeit | X |  |
| Verwendung einer Nabe höherer Festigkeit |  | X |
| Verwendung von Schrauben größeren Durchmessers | X |  |
| Erhöhung der Schraubenanzahl | X |  |
| Verwendung einer Welle höherer Festigkeit |  | X |

A.6.5 Variation der Ansätze

Sämtliche Gleichungen sind in Bild 6.12 zusammengestellt.

1. Dimensionierung nach der **zulässigen Pressung**:

„biegesteife“ Nabe:

Mtmax = 1,57 * L * d² * µ * pzul

Mtmax = 1,57 * mm * (50mm)² * 0,1 * 60 N/mm² = 1154 Nm

„biegeweiche“ Nabe:

Mtmax = L * d² * µ * pzul = mm * (50mm)² * 0,1 * 60 N/mm² = 735 Nm

|  |  |  | Annahme  „biegesteife Nabe“ | Annahme  „biegeweiche Nabe“ |
| --- | --- | --- | --- | --- |
|  | pmax = pzul | N/mm² | **60** | **60** |
|  | Mt | Nm | 1154 | 735 |
|  | FV | kN | 49,0 | 38,4 |

1. Dimensionierung nach dem zu **übertragenden Moment**:

„biegesteife“ Nabe:

„biegeweiche“ Nabe:

|  |  |  | Annahme  „biegesteife Nabe“ | Annahme  „biegeweiche Nabe“ |
| --- | --- | --- | --- | --- |
|  | pmax | N/mm² | 23,4 | 36,7 |
|  | Mt | Nm | **450** | **450** |
|  | FV | kN | 19,1 | 23,5 |

1. Dimensionierung nach dem zu **maximalen Schraubenvorspannkraft**:

„biegesteife“ Nabe:

Mtmax = 3,14 *µ * d * i * FV = 3,14 * 0,1 * 50mm * 1,5 * 32kN = 754 Nm

„biegeweiche“ Nabe:

Mtmax = 2,55 *µ * d * i * FV = 2,55 * 0,1 * 50mm * 1,5 * 32kN = 612 Nm

|  |  |  | Annahme  „biegesteife Nabe“ | Annahme  „biegeweiche Nabe“ |
| --- | --- | --- | --- | --- |
|  | pmax | N/mm² | 40,3 | 50,0 |
|  | Mt | Nm | 754 | 612 |
|  | FV = FVmax | kN | **32** | **32** |

Die Schwachstelle der Konstruktion sind die Schrauben

Kraftschluß: Zylinderpreßverband

Erforderliche Mindestpressung

A.6.6 Erforderliche Pressung bei Torsions- und Längskraftbelastung

Gl. 6.33

Fax = 10 kN  21,8 N/mm²

Mt = 500 Nm  = 57,4 N/mm²

Fax = 10 kN und Mt = 500 Nm

 = 61,4 N/mm²

| Welche Pressung ist erforderlich, wenn eine Axialkraft Fax = 10 kN übertragen werden soll? | p | N/mm² | 21,8 |
| --- | --- | --- | --- |
| Welche Pressung ist erforderlich, wenn ein Torsionsmoment Mt = 500 Nm übertragen werden soll? | p | N/mm² | 57,4 |
| Welche Pressung ist erforderlich, wenn sowohl die o.a. Axialkraft Fax als auch das Torsionsmoment Mt gleichzeitig übertragen werden sollen? | p | N/mm² | 61,4 |

A.6.7 Erforderlicher Durchmesser bei Torsions- und Längskraftbelastung

a. Axialkraft wird formschlüssig abgestützt,

nur das Torsionsmoment belastet den Reibschluß

Gl. 6.31 L = 0,9 * d

d = 46,96 mm  L = 42,27 mm

1. Axialkraft und Torsionsmoment belasten den Reibschluß

L = 0,9 * d

Auflösen der Gleichung nach d problematisch

daher Umstellung der Gleichung und Iteration;

Reibwert µ = 0,08 soll vollständig ausgenutzt werden

Iterationsanfang beispielsweise d = 47mm wie unter a.

d = 47 mm  Fres/FN = 0,125  µ = 0,08 rutscht  d vergrößern

d = 50 mm  Fres/FN = 0,108  µ = 0,08 rutscht  d vergrößern

d = 55 mm  Fres/FN = 0,086  µ = 0,08 rutscht  d vergrößern

d = 58 mm  Fres/FN = 0,076  µ = 0,08 hält  d verkleinern

d = 56 mm  Fres/FN = 0,082  µ = 0,08 rutscht  d vergrößern

d = 57 mm  Fres/FN = 0,079  µ = 0,08 hält  d verkleinern

 d = 57 mm; L = 51,3 mm, aufgerundet: L = 52 mm

| Bestimmen Sie den erforderlichen Fügedurchmesser der Verbindung, wenn die Axialkraft so eingeleitet wird wie in der Skizze dargestellt. | d | mm | 46,96 |
| --- | --- | --- | --- |
| Bestimmen Sie den erforderlichen Fügedurchmesser für den Fall, dass die Axialkraft in umgekehrter Richtung eingeleitet wird. Hinweis: Die Berechnung vereinfacht sich, wenn Sie iterativ vorgehen. | d | mm | 57 |

A.6.8 Kegelpressverband I

Kegel 1:20 →  = 2,87° Gl. 6.35 oder Tab. 6.5

Gl. 6.34

Gl. 6.36

Bild 6.18 rechts

Bild 6.18 unten

Gl. 4.11

Gl. 4.12

Manz = MGewanz + MKR = 135,3 Nm

| Wie groß ist der für die Dimensionierung entscheidende Durchmesser? | dm | mm | 49 |
| --- | --- | --- | --- |
| Welches maximale Torsionsmoment ist übertragbar, wenn die Flächenpressung zwischen Welle und Nabe vollständig ausgenutzt wird? | Mtmax | Nm | 905 |
| Wie groß ist die axiale Kraft, die zur Montage der Verbindung aufgebracht werden muss? | Faxanz | N | 46.153 |
| Wie groß ist die axiale Kraft, die zum Lösen der Verbindung aufgebracht werden muss? | Faxlös | N | - 27.714 |
| Ist für den Lösevorgang eine irgendwie geartete Abziehvorrichtung erforderlich? |  |  | **** ja  O nein |
| Wie groß ist das Schraubenmoment bei der Montage der Verbindung, wenn ein normgerechtes Gewinde M20 verwendet wird? | Manz | Nm | 135 |

A.6.9 Kegelpressverband II

C = 1:20   = 2°52‘  /2 = 1,433° Gl. 6.35 oder Tab. 6.5

Bild 6.18 links

Bild 6.18 rechts

Gl. 4.12

laut Aufgabenstellung

| Wie groß ist die Einpresskraft der Verbindung? | Faxanz | N | 28.125 |
| --- | --- | --- | --- |
| Wie groß ist die Lösekraft der Verbindung? | Faxlös | N | -16.875 |
| Welche Flächenpressung tritt an der Trennfläche zwischen Nabe und Welle auf? | p | N/mm² | 59,7 |
| Welches Gewindemoment ist erforderlich? | MGew | Nm | 45,11 |
| Mit welchem Gesamtmoment muss angezogen werden? | Mges | Nm | 81,2 |
| Wie hoch ist die Zugspannung in der Schraube? | σZ | N/mm² | 179 |
| Wie hoch ist der Torsionsschub in der Schraube? | τt | N/mm² | 82 |
| Welche Vergleichsspannung liegt in der Schraube vor? | σV | N/mm² | 228 |

| Das Schraubenmoment bei der Montage kann in jedem Fall durch Blockieren der Welle abgestützt werden. Montagetechnisch wäre es jedoch einfacher, das Schraubenmoment auch durch Festsetzen der Nabe abstützen. Ist die möglich? Nur eine der folgenden Aussagen trifft zu.  O ja, weil das Anzugsmoment der Schraube kleiner ist als das Moment der Welle-Nabe-Verbindung  **** ja, weil das Gewindemoment der Schraube kleiner ist als das Moment der Welle-Nabe-Verbindung  O ja, weil das Kopfreibungsmoment der Schraube kleiner ist als das Moment der Welle-Nabe-Verbindung  O nein, weil das Anzugsmoment der Schraube größer ist als das Moment der Welle-Nabe-Verbindung  O nein, weil das Gewindemoment der Schraube größer ist als das Moment der Welle-Nabe-Verbindung  O nein, weil das Kopfreibungsmoment der Schraube größer ist als das Moment der Welle-Nabe-Verbindung |
| --- |

A.6.10 Kegelpressverband, Gegenüberstellung der Festigkeitskriterien

Kegel 1:15  dm = 30 mm Tabelle 6.5

Dimensionierung nach Pressung:

Bild 8.18 rechts

Bild 6.18 unten

Dimensionierung nach dem zu übertragenden Moment:

Bild 6.18 rechts

Bild 6.18 links

Dimensionierung nach der Axialkraft:

Bild 6.18 unten

Bild 6.18 links

Bild 6.18 links

|  |  | I | II | III |
| --- | --- | --- | --- | --- |
| p | N/mm² | **60** | 58,9 | 66,9 |
| Mtmax | Nm | 285,0 | **280** | 317,8 |
| Fax | N | 26.906 | 26.433 | **30.000** |

weitere Lösungsmöglichkeit:

Die oben ausgenutzten Zusammenhänge sind alle linear. Wenn die Spalte I vollständig berechnet ist, dann können alle anderen Spalten nach Dreisatz ergänzt werden, z.B. Spalte II:

pII = pI * 0,982 = 60 N/mm² * 0,982 = 58,9 N/mm²

FaxII = FaxI * 0,982 = 26.906 N * 0,982 = 26.433 N
